# Supplementary material for: Chemo- and regioselective ring-opening of donor–acceptor oxiranes with N-heteroaromatics
Source: Royal Society of Chemistry journal article supplement (doi:10.1039/d1cc00600b), 2021-01-01
Supplement: d1cc00600b1.pdf [file d1cc00600b1.pdf]

## Supporting Information:

### Chemo- and Regioselective Ring-opening of Donor-Acceptor Oxiranes with *N*-Heteroaromatics

Ji-Wei Sang, Ming-Sheng Xie,\* Man-Man Wang, Gui-Rong Qu, and Hai-Ming Guo\*

NMPA Key Laboratory for Research and Evaluation of Innovative Drug, Key Laboratory of Green Chemical Media and Reactions, Ministry of Education, Collaborative Innovation Center of Henan Province for Green Manufacturing of Fine Chemicals, School of Chemistry and Chemical Engineering, Henan Normal University, Xinxiang, Henan 453007, China.

*E-mail: xiemingsheng@htu.edu.cn; ghm@htu.edu.cn*

#### Contents

|                                                                          |      |
|--------------------------------------------------------------------------|------|
| 1. General information .....                                             | S2   |
| 2. Synthesis of starting materials .....                                 | S3   |
| 3. General procedure for the ring-opening reaction.....                  | S6   |
| 4. Optimization of reaction conditions for the asymmetric catalysis..... | S8   |
| 5. Experimental procedure for the transformations of the product .....   | S10  |
| 6. The X-ray crystallographic data.....                                  | S13  |
| 7. Results for deuterium labeling experiment .....                       | S20  |
| 8. Optimization of the reaction conditions.....                          | S21  |
| 9. Hammett plot analysis.....                                            | S23  |
| 10. Kinetic experiments .....                                            | S27  |
| 11. Electronic conductivity experiments.....                             | S34  |
| 12. Conversion of <b>4a</b> to <b>3a</b> .....                           | S35  |
| 13. Unsuccessful substrates .....                                        | S36  |
| 14. Characterization data of new compounds .....                         | S37  |
| 15. NMR spectra .....                                                    | S85  |
| 16. Crude <sup>1</sup> H NMR data.....                                   | S145 |
| 17. Reference .....                                                      | S162 |

## 1. General information

<sup>1</sup>H NMR spectra were recorded on Bruker Avance III HD 600 or Avance 400 MHz spectrometer. Chemical shifts are recorded in ppm relative to tetramethylsilane and with the solvent resonance as the internal standard. Data are reported as follows: chemical shift, multiplicity (s = singlet, d = doublet, t = triplet, q = quartet, dd = doublet of doublets, dq = doublet of quartets, dt = doublet of triplets, td = triplet of doublets, m = multiplet), coupling constants (Hz), integration. <sup>13</sup>C NMR data were collected on Bruker Avance III HD 150 or Avance 100 MHz spectrometer. Enantiomer excesses were determined by chiral HPLC analysis on Chiralcel IF/IA in comparison with the authentic racemates. Chiral HPLC analysis recorded on Thermo scientific Dionex Ultimate 3000 and Agilent Technologies 1260 Infinity. HRMS were recorded on an ABI/Sciex QStar Mass Spectrometer (ESI). Single crystal X-ray crystallography data were obtained on Supernova Atlas S2 CCD detector. IR were detected by Bruker Tensor II 400F. The electronic conductivity was determined by SevenCompact S230. Other solvents used for work-up and purification purposes were purchased in technical grade quality and distilled by rotary evaporator before use.

## 2. Synthesis of starting materials

### 1) Synthesis of oxiranes:<sup>1,2</sup>

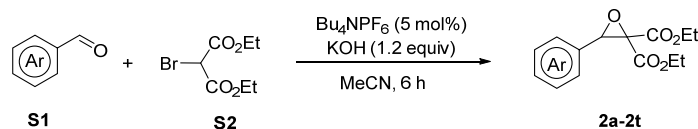

The solution of aldehyde (1.0 mmol), diethyl 2-bromomalonate (239.1 mg, 1.0 mmol, 1.0 equiv),  $\text{Bu}_4\text{NPF}_6$  (19.4 mg, 0.05 mmol, 5 mol%) in  $\text{CH}_3\text{CN}$  (3 mL) was stirred for 30 min. Then the powdered KOH (67.3 mg, 1.2 mmol, 1.2 equiv) was added. After the mixture was stirred at ambient temperature for 6 h, the solvent was removed under reduced pressure. Subsequently, water (5 mL) and  $\text{Et}_2\text{O}$  (10 mL) were added into the residue respectively. The organic layer was separated and the aqueous layer was extracted with  $\text{Et}_2\text{O}$  (3×5 mL). The combined organic layers were washed with water (3×5 mL) and dried over anhydrous  $\text{Mg}_2\text{SO}_4$ . After filtration and removal of the solvents, the resulted residue was purified by silica gel column chromatography using Pet/EtOAc system (Pet/EtOAc, 100/1 to 50/1, v/v) to afford oxiranes **2a-2t** (50-88% yields).

### 2) Synthesis of dimethyl 3-phenyloxirane-2,2-dicarboxylate and aryl oxiranyl diketones:<sup>3</sup>

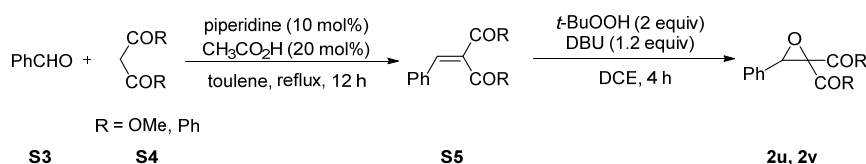

To a round bottom flask connected to a Dean-Stark apparatus, benzaldehyde (11.0 mmol), **S4** (10.0 mmol), acetic acid glacial (2.0 mmol), pyrrole (1.0 mmol) and toluene (20 mL) were added respectively. The mixture was heated at reflux until the starting materials were consumed as indicated by TLC analysis. After being cooled down to room temperature, the reaction mixture was concentrated under reduced pressure. The crude product was purified by silica gel chromatography to afford alkene **S5** in 85% and 86% yields, respectively. To a well-stirred solution of alkene (11 mmol) in DCE which was cooled in an ice bath were added *t*-BuOOH (2 equiv) and DBU (1.2 equiv). The reaction mixture was further stirred for 4 h. After removing the solvent DCE, the crude product was purified by silica gel column chromatography using Pet/EtOAc system (Pet/EtOAc, 100/1 to 10/1, v/v) and dried under vacuum, the pure products were obtained **2u** and **2v** (50 and 82% yields).

### 3) Synthesis of chiral oxirane **2v**.<sup>4</sup>

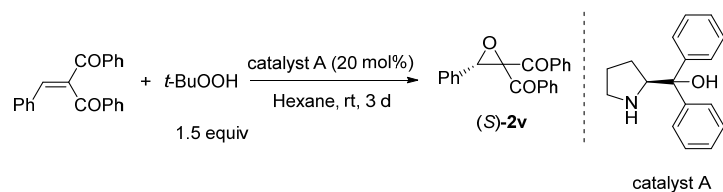

**2v**, 86% yield and 75% ee. By recrystallized from cyclohexane and ethyl acetate at 0 °C, its optical purity was enriched to 96% ee. The ee value was determined by HPLC, CHIRALCEL IF, n-hexane/2-propanol = 90/10, flow rate = 0.6 mL/min,  $\lambda$  = 256 nm, retention time: 14.92 min (minor), 15.97 min (major).

**Figure S1.** HPLC spectra of racemic **2v**

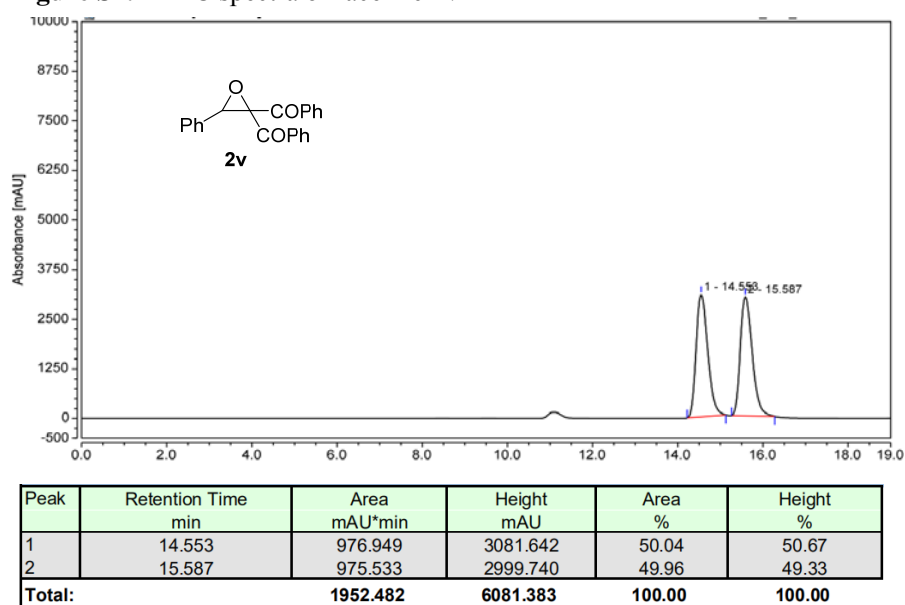

HPLC spectra of (S)-**2v**

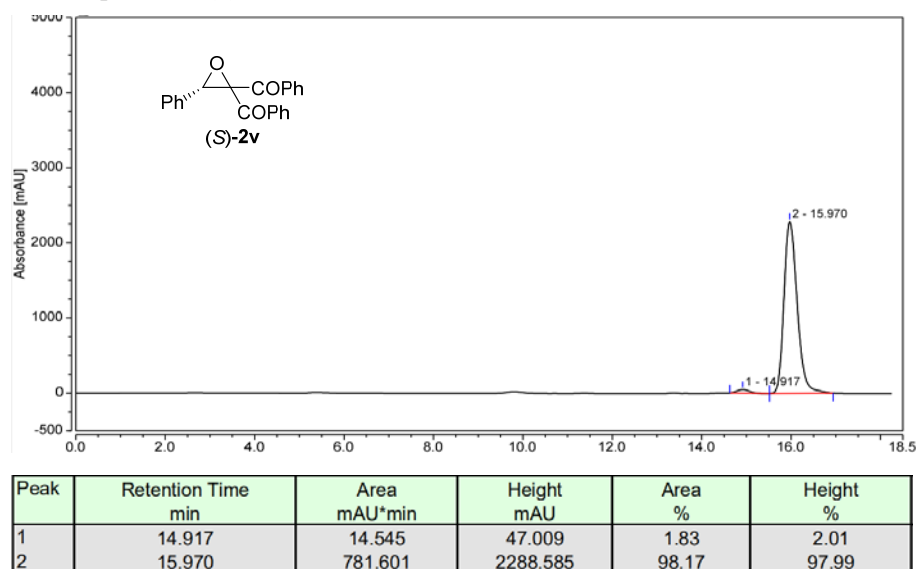

#### 4) The asymmetric reaction of chiral oxirane **2v** and **1a**.

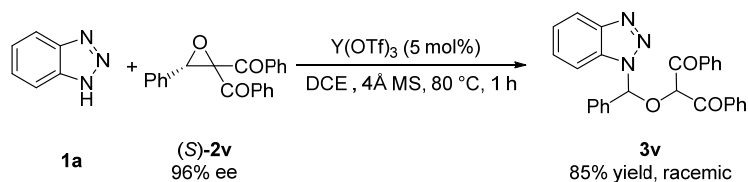

**3v**, 85% yield. The ee value was determined by HPLC, CHIRALCEL IA, n-hexane/2-propanol = 70/30, flow rate = 1.0 mL/min,  $\lambda$  = 256 nm, retention time: 9.57 min (minor), 21.79 min (major).

**Figure S2.** HPLC spectra of racemic **3v**

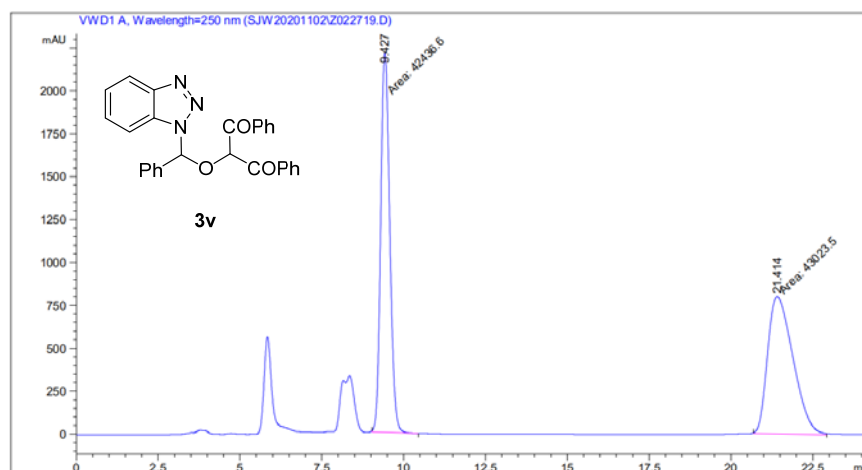

| Peak # | RetTime [min] | Type | Width [min] | Area [mAU*s] | Height [mAU] | Area %  |
|--------|---------------|------|-------------|--------------|--------------|---------|
| 1      | 9.427         | MM   | 0.3196      | 4.24366e4    | 2212.86621   | 49.6566 |
| 2      | 21.414        | MM   | 0.8973      | 4.30235e4    | 799.09314    | 50.3434 |

HPLC spectra of **3v** after asymmetric reaction

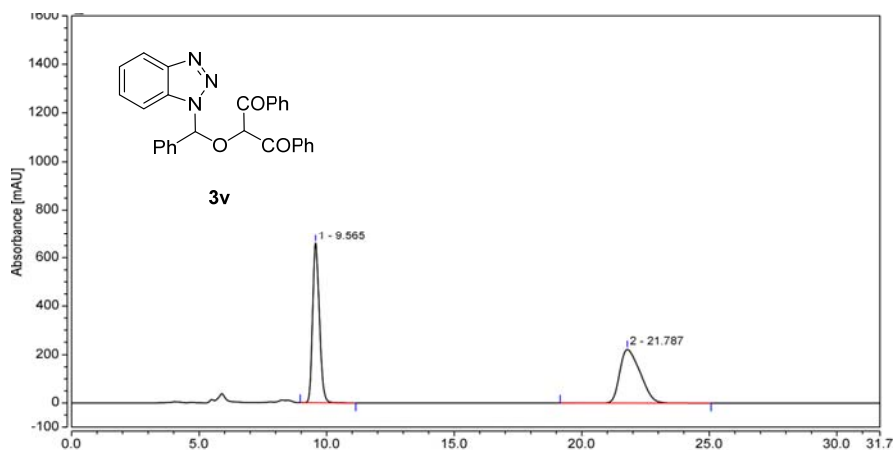

| Peak          | Retention Time min | Area mAU*min   | Height mAU     | Area %        | Height %      |
|---------------|--------------------|----------------|----------------|---------------|---------------|
| 1             | 9.565              | 203.540        | 659.581        | 49.79         | 74.80         |
| 2             | 21.787             | 205.250        | 222.268        | 50.21         | 25.20         |
| <b>Total:</b> |                    | <b>408.791</b> | <b>881.849</b> | <b>100.00</b> | <b>100.00</b> |

### 3. General procedure for the ring-opening reaction

#### 1) Procedure A:

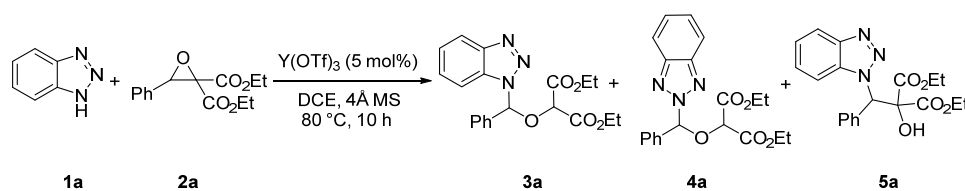

The reaction was performed in a 15 mL pressure tube, and phenyl oxiranyl dicarboxylate **2a** (26.4 mg, 0.1 mmol, 1.0 equiv) was dissolved in DCE (2 mL). Benzotriazole **1a** (12 mg, 0.1 mmol), Y(OTf)<sub>3</sub> (2.7 mg, 0.005 mmol, 5 mol%), and activated 4Å molecular sieve (30 mg) were added respectively and the tube was sealed. The reaction mixture was stirred at 80 °C for 10 h (oil bath as the heat source). Upon completion, the reaction mixture was then purified by preparative thin layer chromatography using Pet/EtOAc system (Pet/EtOAc, 4/1, v/v) to give product **3a** as a colorless solid (36.1 mg, 94% yield). The ratio of isomers and chemoselectivity was determined by <sup>1</sup>H NMR analysis of the crude reaction mixture (**3a**:**4a**:**5a** = 96:4:0). Unless otherwise noted, **3b-3v** were synthesized in the same reaction conditions.

#### 2) Gram-scale synthesis of **3a**.

The reaction was performed in a 250 mL pressure tube, and phenyl oxiranyl dicarboxylate **2a** (1.32 g, 5.0 mmol, 1.0 equiv) was dissolved in DCE (100 mL). Benzotriazole **1a** (600 mg, 5.0 mmol), Y(OTf)<sub>3</sub> (135 mg, 0.25 mmol, 5 mol%), and activated 4Å molecular sieve (1.5 g) were added respectively and the tube was sealed. The reaction mixture was stirred at 80 °C for 10 h (oil bath as the heat source). Upon completion, the reaction mixture was then purified by preparative thin layer chromatography using Pet/EtOAc system (Pet/EtOAc, 4/1, v/v) to give product **3a** as a colorless solid (1.65 g, 86% yield). The ratio of isomers and chemoselectivity was determined by <sup>1</sup>H NMR analysis of the crude reaction mixture (**3a**:**4a**:**5a** = 96:4:0).

### 3) General procedure for the catalytic asymmetric reaction

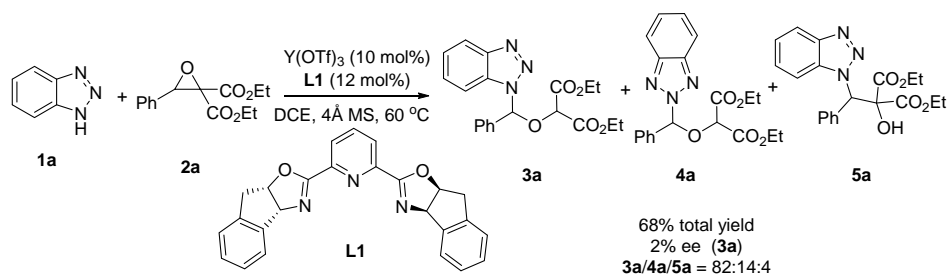

To a Schlenk tube equipped with a magnetic stir bar were added  $Y(OTf)_3$  (5.4 mg, 0.01 mmol, 10 mol%), phenyl oxiranyl dicarboxylate **2a** (26.4 mg, 0.1 mmol, 1.0 equiv), **L** (8.4 mg, 0.012mmol, 12 mol%), 4Å MS (30 mg) and 1.0 mL of DCE. The mixture was stirred at 30 °C for 1 h. Benzotriazole **1a** (12 mg, 0.1 mmol) was then added into the tube. After being stirred at 60 °C for 24h. Upon completion, the reaction mixture was then purified by preparative thin layer chromatography using Pet/EtOAc system (Pet/EtOAc, 4/1, v/v) to give product **3a** (2% ee), **3a/4a/5a** = 82:14:4.

## 4. Optimization of reaction conditions for the asymmetric catalysis

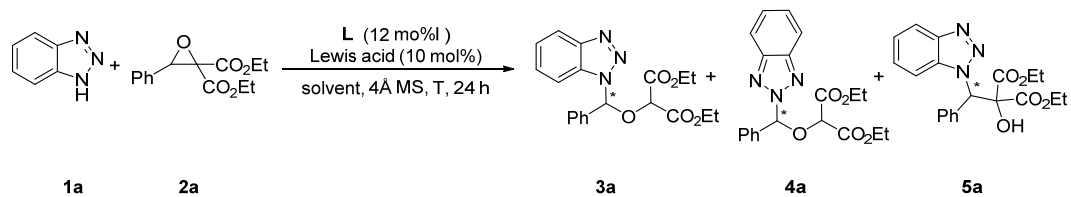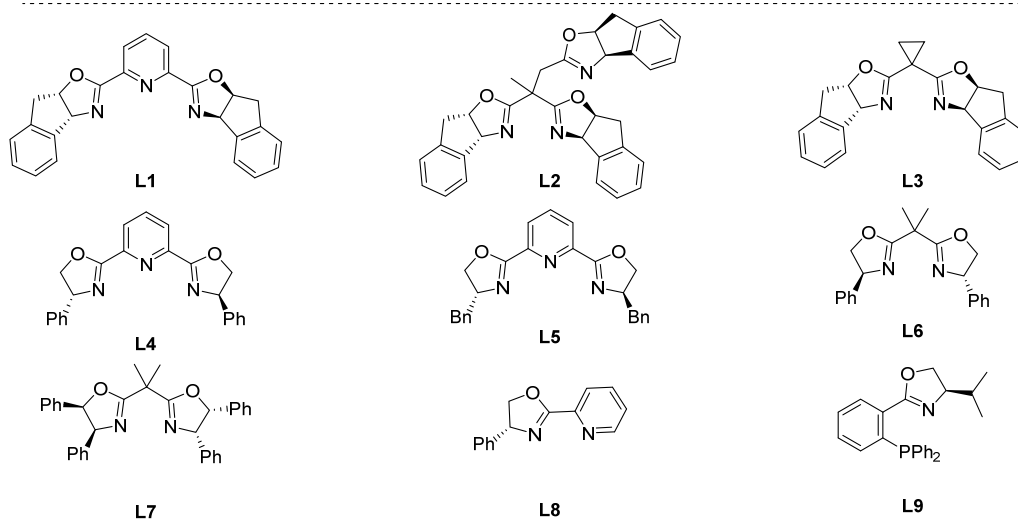

| entry <sup>a</sup> | catalyst                                              | solvent | L         | T<br>(°C) | yield (%) <sup>b</sup> | ratio <sup>c</sup> | ee (%) <sup>d</sup> |
|--------------------|-------------------------------------------------------|---------|-----------|-----------|------------------------|--------------------|---------------------|
|                    |                                                       |         |           |           |                        | 3a/4a/5a           | 3a                  |
| 1                  | Ni(ClO <sub>4</sub> ) <sub>2</sub> ·6H <sub>2</sub> O | DCE     | <b>L1</b> | 30        | NR                     | -                  | -                   |
| 2                  | Sc(OTf) <sub>3</sub>                                  | DCE     | <b>L1</b> | 30        | NR                     | -                  | -                   |
| 3                  | Yb(OTf) <sub>3</sub>                                  | DCE     | <b>L1</b> | 30        | NR                     | -                  | -                   |
| 4                  | Gd(OTf) <sub>3</sub>                                  | DCE     | <b>L1</b> | 30        | 35                     | 92/3/5             | 1                   |
| 5                  | Y(OTf) <sub>3</sub>                                   | DCE     | <b>L1</b> | 30        | 49                     | 86/4/10            | 2                   |
| 6                  | Y(OTf) <sub>3</sub>                                   | DCE     | <b>L2</b> | 30        | NR                     | -                  | -                   |
| 7                  | Y(OTf) <sub>3</sub>                                   | DCE     | <b>L3</b> | 30        | NR                     | -                  | -                   |
| 8                  | Y(OTf) <sub>3</sub>                                   | DCE     | <b>L4</b> | 30        | NR                     | -                  | -                   |
| 9                  | Y(OTf) <sub>3</sub>                                   | DCE     | <b>L5</b> | 30        | NR                     | -                  | -                   |
| 10                 | Y(OTf) <sub>3</sub>                                   | DCE     | <b>L6</b> | 30        | NR                     | -                  | -                   |
| 11                 | Y(OTf) <sub>3</sub>                                   | DCE     | <b>L7</b> | 30        | NR                     | -                  | -                   |
| 12                 | Y(OTf) <sub>3</sub>                                   | DCE     | <b>L8</b> | 30        | NR                     | -                  | -                   |



|    |                     |         |           |    |    |          |   |
|----|---------------------|---------|-----------|----|----|----------|---|
| 13 | Y(OTf) <sub>3</sub> | DCE     | <b>L9</b> | 30 | NR | -        | - |
| 14 | Y(OTf) <sub>3</sub> | DCE     | <b>L1</b> | 60 | 68 | 82/14/4  | 2 |
| 15 | Y(OTf) <sub>3</sub> | DCE     | <b>L1</b> | 80 | 91 | 89/11/0  | 1 |
| 16 | Y(OTf) <sub>3</sub> | DCM     | <b>L1</b> | 30 | 35 | 62/30/8  | 0 |
| 17 | Y(OTf) <sub>3</sub> | Toulene | <b>L1</b> | 30 | 19 | 25/25/50 | 0 |

<sup>a</sup>Reaction conditions: **1a** (0.1 mmol), **2a** (0.1 mmol), Lewis acids (10 mol%), **L** (12 mol%), 4Å MS (30 mg) for 24 h. <sup>b</sup>The total yield was determined by <sup>1</sup>H NMR using CH<sub>2</sub>Br<sub>2</sub> as an internal standard. <sup>c</sup>The ratio was determined by <sup>1</sup>H NMR analysis of the crude product. <sup>d</sup>Determined by chair HPLC analysis.

**Figure S3.** HPLC spectra of **3a**

The ee value was determined by HPLC, CHIRALCEL IA, n-hexane/2-propanol = 80/20, flow rate = 0.8 mL/min, λ = 256 nm, retention time: 13.22 min (minor), 14.65 min (major).

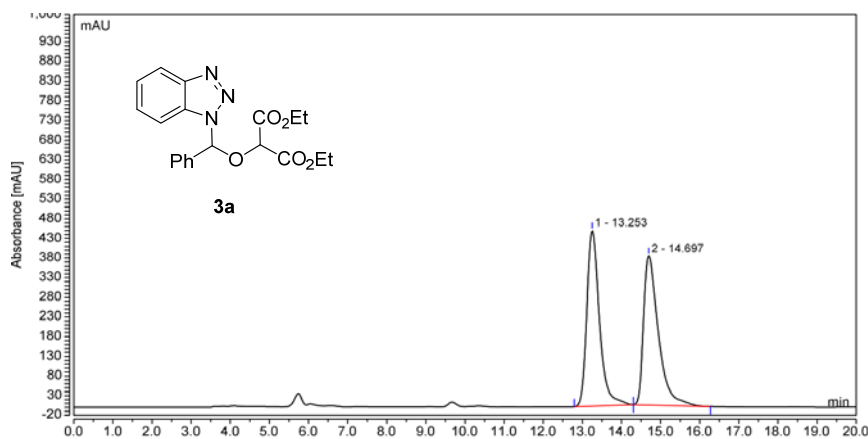

| Peak          | Retention Time<br>min | Area<br>mAU*min | Height<br>mAU  | Area<br>%     | Height<br>%   |
|---------------|-----------------------|-----------------|----------------|---------------|---------------|
| 1             | 13.253                | 167.384         | 447.394        | 50.03         | 54.04         |
| 2             | 14.697                | 167.173         | 380.551        | 49.97         | 45.96         |
| <b>Total:</b> |                       | <b>334.557</b>  | <b>827.945</b> | <b>100.00</b> | <b>100.00</b> |

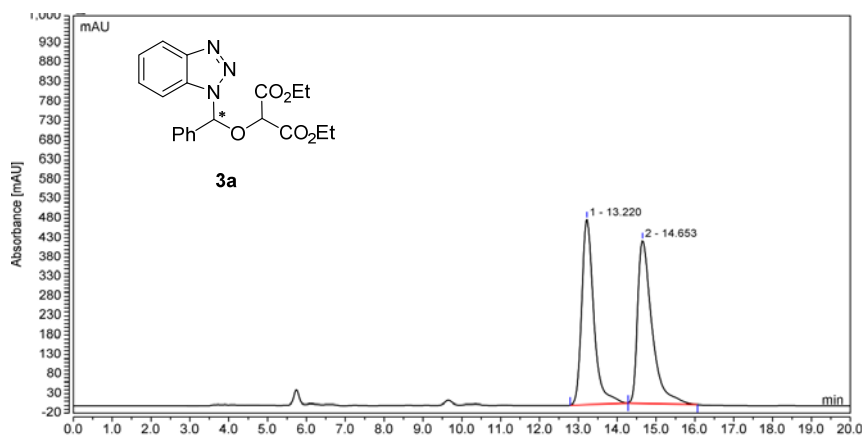

| Peak          | Retention Time<br>min | Area<br>mAU*min | Height<br>mAU  | Area<br>%     | Height<br>%   |
|---------------|-----------------------|-----------------|----------------|---------------|---------------|
| 1             | 13.220                | 171.182         | 474.847        | 48.83         | 53.17         |
| 2             | 14.653                | 179.365         | 418.227        | 51.17         | 46.83         |
| <b>Total:</b> |                       | <b>350.547</b>  | <b>893.074</b> | <b>100.00</b> | <b>100.00</b> |

## 5. Experimental procedure for the transformations of the product

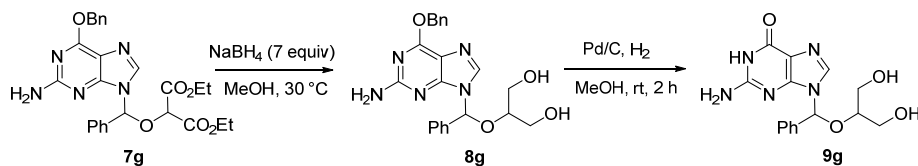

To a stirred solution of **7g** (50.5 mg, 0.1 mmol) in MeOH (2 mL), NaBH<sub>4</sub> (27 mg, 0.7 mmol, 7.0 equiv) was added. Then the reaction was performed at 30 °C for 0.5 h. The mixture was quenched with saturated NH<sub>4</sub>Cl solution (1 mL), extracted with ethyl acetate (3×5 mL). The organic layers were combined and dried over anhydrous Mg<sub>2</sub>SO<sub>4</sub>. After filtration and removal of the solvents, the crude product was purified by silica gel column chromatography using DCM/MeOH system (DCM/MeOH, 10/1, v/v) to afford compound **8g** (38.3 mg, 91% yield).

A mixture of **8g** (42.1 mg, 0.1 mmol) and 10% Pd/C (8.5 mg) in methanol (2 mL) was stirred at room temperature under H<sub>2</sub> for 2 h. The reaction mixture was filtered over celite, and the filtrate was concentrated in vacuo. The crude product was purified by silica gel column chromatography using DCM/MeOH system (DCM/MeOH, 2/1, v/v) to afford compound **9g** (30.8 mg, 93% yield).

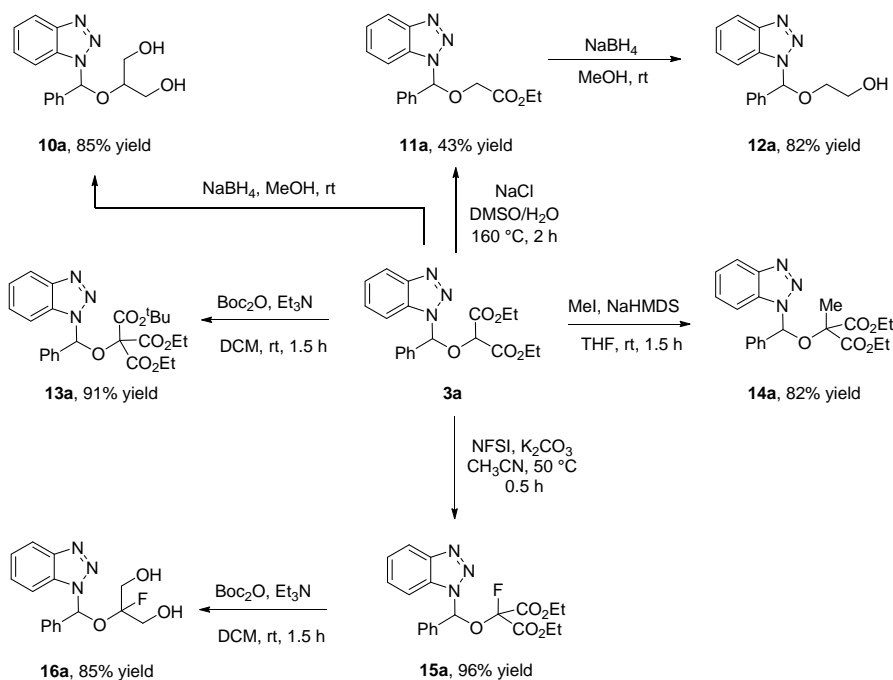

To a stirred solution of **3a** (38.3 mg, 0.1 mmol) in MeOH (1 mL), NaBH<sub>4</sub> (18.9 mg, 0.5 mmol, 5.0 equiv) was added. Then the reaction was performed at room temperature for 0.5 h. The mixture was quenched with saturated NH<sub>4</sub>Cl solution (1 mL), and extracted with ethyl acetate (3×5 mL). The organic layers were combined and dried over anhydrous Mg<sub>2</sub>SO<sub>4</sub>. After filtration

and removal of the solvents, the crude product was purified by silica gel column chromatography using Pet/EtOAc system (Pet/EtOAc, 1/1, v/v) to afford compound **10a** (25.4 mg, 85% yield).

To the solution of **3a** (191.5 mg, 0.5 mmol, 1.0 equiv) in DMSO (1 mL, 0.5 M) was added NaCl (44.5 mg, 1.05 mmol, 2.1 equiv) and H<sub>2</sub>O (10  $\mu$ L, 0.55 mmol, 1.1 equiv). The reaction was allowed to stir at 160 °C for 2 h (oil bath as the heat source) and then quenched with EtOAc/H<sub>2</sub>O, extracted with EtOAc, dried with Na<sub>2</sub>SO<sub>4</sub>, filtered, and concentrated in vacuo. This crude mixture was then immediately purified by flash chromatography on silica gel (Pet/EtOAc, 4/1, v/v) to afford the product **11a** (65.9 mg, 43% yield).

To a stirred solution of **11a** (62.2 mg, 0.2 mmol) in MeOH (2 mL), NaBH<sub>4</sub> (37.8 mg, 1.0 mmol, 5.0 equiv) was added. Then the reaction was performed at room temperature for 0.5 h. The mixture was quenched with saturated NH<sub>4</sub>Cl solution (2 mL), and extracted with ethyl acetate (3 $\times$ 10 mL). The organic layers were combined and dried over anhydrous Mg<sub>2</sub>SO<sub>4</sub>. After filtration and removal of the solvents, the crude product was purified by silica gel column chromatography (Pet/EtOAc, 2/1, v/v) to afford compound **12a** (44.1 mg, 82% yield).

To a solution of adduct **3a** (38.3 mg, 0.1 mmol, 1.0 equiv) in DCM (1.0 mL) was added 4-dimethylaminopyridine (1.8 mg, 0.015 mmol, 0.15 equiv), triethylamine (20.9  $\mu$ L, 0.15 mmol, 1.5 equiv) and di-*tert*-butyl dicarbonate (34.4  $\mu$ L, 0.015 mmol, 1.5 equiv) at room temperature. The mixture was allowed to stir at ambient temperature for 1.5 h. Purification by flash chromatography (Pet/EtOAc, 4/1, v/v) furnished the corresponding product **13a** in 44.0 mg (91% yield).

To a solution of adduct **3a** (38.3 mg, 0.1 mmol, 1.0 equiv) in THF (1.0 mL) was added sodium bis(trimethylsilyl)amide (0.6 M in toluene, 360  $\mu$ L, 0.22 mmol, 1.1 equiv), methyl iodide (9.5  $\mu$ L, 0.15 mmol, 1.5 equiv) was then added. After stirring at room temperature for 1.5 h, the crude compound was purified by column chromatography on silica gel (Pet/EtOAc, 4/1, v/v), affording the desired compound **14a** (32.6 mg, 82% yield).

To a solution of adduct **3a** (38.3 mg, 0.1 mmol, 1.0 equiv) in MeCN (1.0 mL) was added K<sub>2</sub>CO<sub>3</sub> (15.2 mg, 0.11 mmol, 1.1 equiv), NFSI (35 mg, 0.11 mmol, 1.1 equiv) was then added. After stirring at 50 °C 0.5 h, the crude compound was purified by column chromatography on silica gel (Pet/EtOAc, 4/1, v/v), affording the desired compound **15a** (38.5 mg, 96% yield).

To a stirred solution of **15a** (40.1 mg, 0.1 mmol) in MeOH (1 mL), NaBH<sub>4</sub> (18.9 mg, 0.5 mmol, 5.0 equiv) was added. Then the reaction was performed at room temperature for 0.5 h. The

mixture was quenched with saturated  $\text{NH}_4\text{Cl}$  solution (1 mL), and extracted with ethyl acetate (3×5 mL). The organic layers were combined and dried over anhydrous  $\text{Mg}_2\text{SO}_4$ . After filtration and removal of the solvents, the crude product was purified by silica gel column chromatography using Pet/EtOAc system (Pet/EtOAc, 1/1, v/v) to afford compound **16a** (27.0 mg, 85% yield).

## 6. The X-ray crystallographic data

**Figure S4.** X-ray crystal structure of **3a** (The crystal was obtained by slow evaporation of **3a** in a mixture of Et<sub>2</sub>O). (CCDC 2018326):

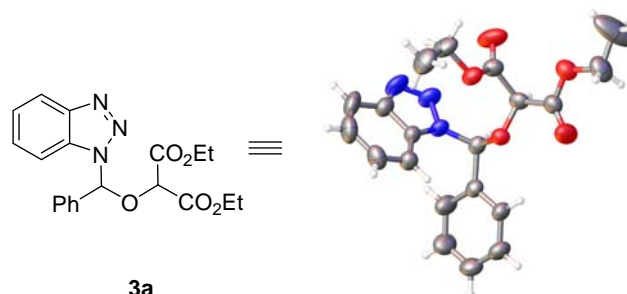

**Table S1 Crystal data and structure refinement for 3a.**

|                                    |                                                               |
|------------------------------------|---------------------------------------------------------------|
| Identification code                | <b>3a</b>                                                     |
| Empirical formula                  | C <sub>20</sub> H <sub>21</sub> N <sub>3</sub> O <sub>5</sub> |
| Formula weight                     | 383.40                                                        |
| Temperature/K                      | 293.50(10)                                                    |
| Crystal system                     | monoclinic                                                    |
| Space group                        | P2 <sub>1</sub> /c                                            |
| a/Å                                | 9.4068(5)                                                     |
| b/Å                                | 21.5669(9)                                                    |
| c/Å                                | 9.8567(6)                                                     |
| α/°                                | 90                                                            |
| β/°                                | 94.988(5)                                                     |
| γ/°                                | 90                                                            |
| Volume/Å <sup>3</sup>              | 1992.11(18)                                                   |
| Z                                  | 4                                                             |
| ρ <sub>calc</sub> /cm <sup>3</sup> | 1.278                                                         |
| μ/mm <sup>-1</sup>                 | 0.093                                                         |
| F(000)                             | 808.0                                                         |
| Crystal size/mm <sup>3</sup>       | 0.12 × 0.1 × 0.08                                             |
| Radiation                          | Mo Kα (λ = 0.71073)                                           |
| 2θ range for data collection/      | 6.874 to 58.084                                               |
| Index ranges                       | -12 ≤ h ≤ 11, -25 ≤ k ≤ 28, -11 ≤ l ≤ 13                      |
| Reflections collected              | 12787                                                         |
| Independent reflections            | 4606 [R <sub>int</sub> = 0.0275, R <sub>sigma</sub> = 0.0367] |
| Data/restraints/parameters         | 4606/0/255                                                    |
| Goodness-of-fit on F <sup>2</sup>  | 1.026                                                         |
| Final R indexes [I ≥ 2σ (I)]       | R <sub>1</sub> = 0.0607, wR <sub>2</sub> = 0.1341             |
| Final R indexes [all data]         | R <sub>1</sub> = 0.0940, wR <sub>2</sub> = 0.1536             |

Largest diff. peak/hole / e Å<sup>-3</sup> 0.26/-0.30

**Figure S5.** X-ray crystal structure of **5a** (The crystal was obtained by slow evaporation of **5a** in a mixture of Et<sub>2</sub>O). (CCDC 2018327):

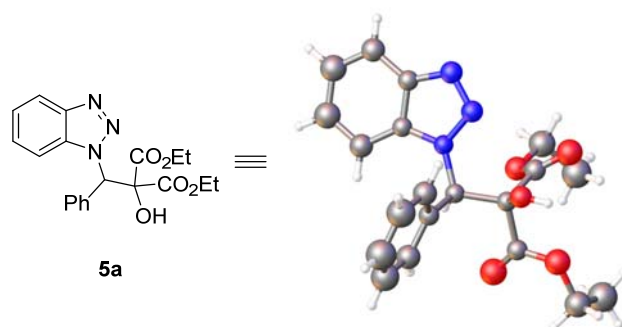

**Table S2 Crystal data and structure refinement for 5a.**

|                                             |                                                               |
|---------------------------------------------|---------------------------------------------------------------|
| Identification code                         | <b>5a</b>                                                     |
| Empirical formula                           | C <sub>20</sub> H <sub>21</sub> N <sub>3</sub> O <sub>5</sub> |
| Formula weight                              | 383.40                                                        |
| Temperature/K                               | 292.8(4)                                                      |
| Crystal system                              | monoclinic                                                    |
| Space group                                 | P2 <sub>1</sub> /n                                            |
| a/Å                                         | 8.3393(2)                                                     |
| b/Å                                         | 21.3081(6)                                                    |
| c/Å                                         | 11.1096(4)                                                    |
| α/°                                         | 90                                                            |
| β/°                                         | 100.128(3)                                                    |
| γ/°                                         | 90                                                            |
| Volume/Å <sup>3</sup>                       | 1943.35(10)                                                   |
| Z                                           | 4                                                             |
| ρ <sub>calc</sub> /cm <sup>3</sup>          | 1.310                                                         |
| μ/mm <sup>-1</sup>                          | 0.793                                                         |
| F(000)                                      | 808.0                                                         |
| Crystal size/mm <sup>3</sup>                | 0.13 × 0.11 × 0.09                                            |
| Radiation                                   | Cu Kα (λ = 1.54184)                                           |
| 2θ range for data collection/               | 8.3 to 142.94                                                 |
| Index ranges                                | -10 ≤ h ≤ 7, -25 ≤ k ≤ 26, -13 ≤ l ≤ 12                       |
| Reflections collected                       | 9682                                                          |
| Independent reflections                     | 3721 [R <sub>int</sub> = 0.0285, R <sub>sigma</sub> = 0.0305] |
| Data/restraints/parameters                  | 3721/0/259                                                    |
| Goodness-of-fit on F <sup>2</sup>           | 1.055                                                         |
| Final R indexes [I ≥ 2σ (I)]                | R <sub>1</sub> = 0.0557, wR <sub>2</sub> = 0.1330             |
| Final R indexes [all data]                  | R <sub>1</sub> = 0.0661, wR <sub>2</sub> = 0.1388             |
| Largest diff. peak/hole / e Å <sup>-3</sup> | 0.36/-0.20                                                    |

**Figure S6.** X-ray crystal structure of **3j** (The crystal was obtained by slow evaporation of **3j** in a mixture of Et<sub>2</sub>O). (CCDC 2027379):

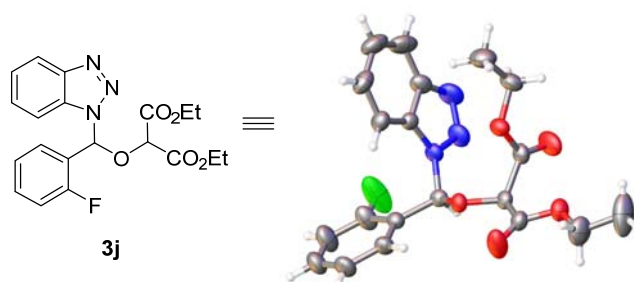

**Table S3 Crystal data and structure refinement for 3j.**

|                                             |                                                                |
|---------------------------------------------|----------------------------------------------------------------|
| Identification code                         | <b>3j</b>                                                      |
| Empirical formula                           | C <sub>20</sub> H <sub>20</sub> FN <sub>3</sub> O <sub>5</sub> |
| Formula weight                              | 401.39                                                         |
| Temperature/K                               | 295.75(10)                                                     |
| Crystal system                              | monoclinic                                                     |
| Space group                                 | P2 <sub>1</sub> /c                                             |
| a/Å                                         | 9.5126(2)                                                      |
| b/Å                                         | 21.7936(4)                                                     |
| c/Å                                         | 9.7318(3)                                                      |
| α/°                                         | 90                                                             |
| β/°                                         | 95.480(2)                                                      |
| γ/°                                         | 90                                                             |
| Volume/Å <sup>3</sup>                       | 2008.32(8)                                                     |
| Z                                           | 4                                                              |
| ρ <sub>calc</sub> /cm <sup>3</sup>          | 1.328                                                          |
| μ/mm <sup>-1</sup>                          | 0.866                                                          |
| F(000)                                      | 840.0                                                          |
| Crystal size/mm <sup>3</sup>                | 0.12 × 0.1 × 0.08                                              |
| Radiation                                   | Cu Kα (λ = 1.54184)                                            |
| 2θ range for data collection/               | 8.114 to 142.848                                               |
| Index ranges                                | -11 ≤ h ≤ 9, -26 ≤ k ≤ 16, -11 ≤ l ≤ 10                        |
| Reflections collected                       | 8495                                                           |
| Independent reflections                     | 3811 [R <sub>int</sub> = 0.0243, R <sub>sigma</sub> = 0.0321]  |
| Data/restraints/parameters                  | 3811/0/264                                                     |
| Goodness-of-fit on F <sup>2</sup>           | 1.105                                                          |
| Final R indexes [I ≥ 2σ (I)]                | R <sub>1</sub> = 0.0570, wR <sub>2</sub> = 0.1406              |
| Final R indexes [all data]                  | R <sub>1</sub> = 0.0662, wR <sub>2</sub> = 0.1492              |
| Largest diff. peak/hole / e Å <sup>-3</sup> | 0.35/-0.43                                                     |

**Figure S7.** X-ray crystal structure of **3t** (The crystal was obtained by slow evaporation of **3t** in a mixture of Et<sub>2</sub>O). (CCDC 2018328):

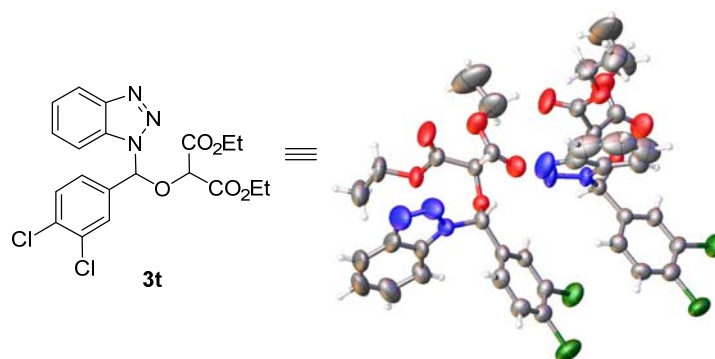

**Table S4 Crystal data and structure refinement for 3t.**

|                                             |                                                                               |
|---------------------------------------------|-------------------------------------------------------------------------------|
| Identification code                         | <b>3t</b>                                                                     |
| Empirical formula                           | C <sub>20</sub> H <sub>19</sub> Cl <sub>2</sub> N <sub>3</sub> O <sub>5</sub> |
| Formula weight                              | 452.28                                                                        |
| Temperature/K                               | 295.28(11)                                                                    |
| Crystal system                              | orthorhombic                                                                  |
| Space group                                 | P2 <sub>1</sub> 2 <sub>1</sub> 2 <sub>1</sub>                                 |
| a/Å                                         | 14.9392(5)                                                                    |
| b/Å                                         | 15.2205(4)                                                                    |
| c/Å                                         | 19.0810(5)                                                                    |
| α/°                                         | 90                                                                            |
| β/°                                         | 90                                                                            |
| γ/°                                         | 90                                                                            |
| Volume/Å <sup>3</sup>                       | 4338.7(2)                                                                     |
| Z                                           | 8                                                                             |
| ρ <sub>calc</sub> /cm <sup>3</sup>          | 1.385                                                                         |
| μ/mm <sup>-1</sup>                          | 3.011                                                                         |
| F(000)                                      | 1872.0                                                                        |
| Crystal size/mm <sup>3</sup>                | 0.13 × 0.1 × 0.09                                                             |
| Radiation                                   | Cu Kα (λ = 1.54184)                                                           |
| 2θ range for data collection/               | 7.43 to 143.072                                                               |
| Index ranges                                | -18 ≤ h ≤ 18, -12 ≤ k ≤ 18, -13 ≤ l ≤ 23                                      |
| Reflections collected                       | 13129                                                                         |
| Independent reflections                     | 7494 [R <sub>int</sub> = 0.0404, R <sub>sigma</sub> = 0.0550]                 |
| Data/restraints/parameters                  | 7494/2/544                                                                    |
| Goodness-of-fit on F <sup>2</sup>           | 1.029                                                                         |
| Final R indexes [I >= 2σ (I)]               | R <sub>1</sub> = 0.0769, wR <sub>2</sub> = 0.2086                             |
| Final R indexes [all data]                  | R <sub>1</sub> = 0.0861, wR <sub>2</sub> = 0.2268                             |
| Largest diff. peak/hole / e Å <sup>-3</sup> | 0.42/-0.48                                                                    |
| Flack parameter                             | 0.44(2)                                                                       |



**Figure S8.** X-ray crystal structure of **3w** (The crystal was obtained by slow evaporation of **3w** in a mixture of Et<sub>2</sub>O). (CCDC 2018329):

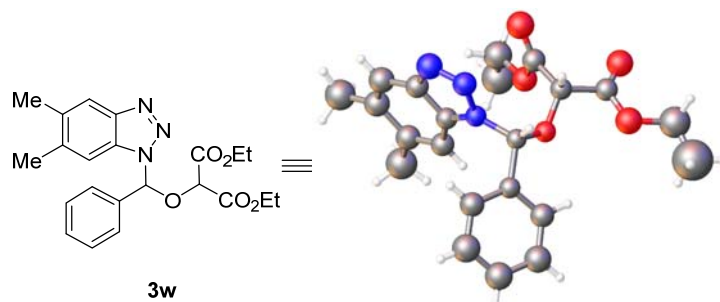

**Table S5 Crystal data and structure refinement for 3w.**

|                                             |                                                               |
|---------------------------------------------|---------------------------------------------------------------|
| Identification code                         | <b>3w</b>                                                     |
| Empirical formula                           | C <sub>22</sub> H <sub>25</sub> N <sub>3</sub> O <sub>5</sub> |
| Formula weight                              | 411.45                                                        |
| Temperature/K                               | 290(4)                                                        |
| Crystal system                              | triclinic                                                     |
| Space group                                 | P-1                                                           |
| a/Å                                         | 9.5779(5)                                                     |
| b/Å                                         | 11.3128(7)                                                    |
| c/Å                                         | 11.8490(8)                                                    |
| α/°                                         | 61.499(7)                                                     |
| β/°                                         | 78.529(5)                                                     |
| γ/°                                         | 86.047(5)                                                     |
| Volume/Å <sup>3</sup>                       | 1105.24(13)                                                   |
| Z                                           | 2                                                             |
| ρ <sub>calc</sub> /cm <sup>3</sup>          | 1.236                                                         |
| μ/mm <sup>-1</sup>                          | 0.730                                                         |
| F(000)                                      | 436.0                                                         |
| Crystal size/mm <sup>3</sup>                | 0.13 × 0.12 × 0.11                                            |
| Radiation                                   | Cu Kα (λ = 1.54184)                                           |
| 2θ range for data collection/               | 8.648 to 142.958                                              |
| Index ranges                                | -9 ≤ h ≤ 11, -11 ≤ k ≤ 13, -14 ≤ l ≤ 14                       |
| Reflections collected                       | 8787                                                          |
| Independent reflections                     | 4210 [R <sub>int</sub> = 0.0193, R <sub>sigma</sub> = 0.0229] |
| Data/restraints/parameters                  | 4210/8/276                                                    |
| Goodness-of-fit on F <sup>2</sup>           | 1.048                                                         |
| Final R indexes [I >= 2σ (I)]               | R <sub>1</sub> = 0.0619, wR <sub>2</sub> = 0.1864             |
| Final R indexes [all data]                  | R <sub>1</sub> = 0.0668, wR <sub>2</sub> = 0.1923             |
| Largest diff. peak/hole / e Å <sup>-3</sup> | 0.44/-0.48                                                    |

**Figure S9.** X-ray crystal structure of **7a** (The crystal was obtained by slow evaporation of **7a** in a mixture of MeOH). (CCDC 2040250):

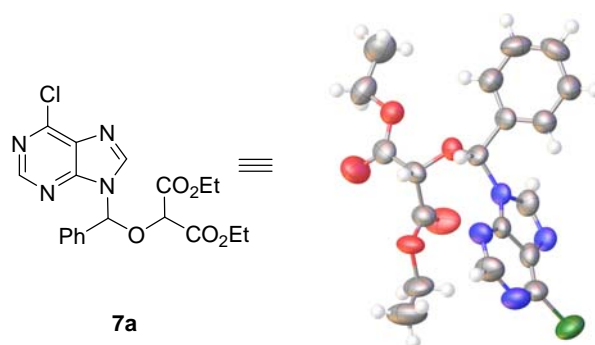

**Table S6 Crystal data and structure refinement for 7a.**

|                                             |                                                                 |
|---------------------------------------------|-----------------------------------------------------------------|
| Identification code                         | <b>7a</b>                                                       |
| Empirical formula                           | C <sub>19</sub> H <sub>19</sub> ClN <sub>4</sub> O <sub>5</sub> |
| Formula weight                              | 418.83                                                          |
| Temperature/K                               | 149.99(10)                                                      |
| Crystal system                              | triclinic                                                       |
| Space group                                 | P-1                                                             |
| a/Å                                         | 11.8048(9)                                                      |
| b/Å                                         | 15.1785(10)                                                     |
| c/Å                                         | 16.7524(12)                                                     |
| α/°                                         | 89.985(6)                                                       |
| β/°                                         | 87.821(6)                                                       |
| γ/°                                         | 80.497(6)                                                       |
| Volume/Å <sup>3</sup>                       | 2958.3(4)                                                       |
| Z                                           | 6                                                               |
| ρ <sub>calc</sub> /cm <sup>3</sup>          | 1.411                                                           |
| μ/mm <sup>-1</sup>                          | 0.233                                                           |
| F(000)                                      | 1308.0                                                          |
| Crystal size/mm <sup>3</sup>                | 0.13 × 0.12 × 0.1                                               |
| Radiation                                   | Mo Kα (λ = 0.71073)                                             |
| 2θ range for data collection/               | 4.064 to 50                                                     |
| Index ranges                                | -13 ≤ h ≤ 14, -15 ≤ k ≤ 18, -17 ≤ l ≤ 19                        |
| Reflections collected                       | 23126                                                           |
| Independent reflections                     | 10386 [R <sub>int</sub> = 0.0531, R <sub>sigma</sub> = 0.0762]  |
| Data/restraints/parameters                  | 10386/26/821                                                    |
| Goodness-of-fit on F <sup>2</sup>           | 1.051                                                           |
| Final R indexes [I ≥ 2σ (I)]                | R <sub>1</sub> = 0.0752, wR <sub>2</sub> = 0.1823               |
| Final R indexes [all data]                  | R <sub>1</sub> = 0.0985, wR <sub>2</sub> = 0.2015               |
| Largest diff. peak/hole / e Å <sup>-3</sup> | 0.68/-0.51                                                      |

**Figure S10.** X-ray crystal structure of **7j** (The crystal was obtained by slow evaporation of **7j** in a mixture of Et<sub>2</sub>O). (CCDC 2038626):

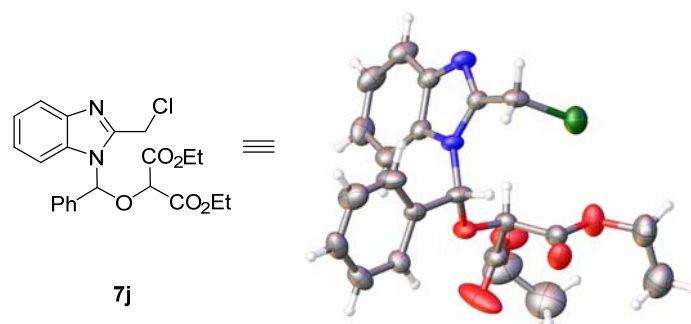

**Table S7 Crystal data and structure refinement for 7j.**

|                                             |                                                                 |
|---------------------------------------------|-----------------------------------------------------------------|
| Identification code                         | <b>7j</b>                                                       |
| Empirical formula                           | C <sub>22</sub> H <sub>23</sub> ClN <sub>2</sub> O <sub>5</sub> |
| Formula weight                              | 430.87                                                          |
| Temperature/K                               | 149.98(10)                                                      |
| Crystal system                              | monoclinic                                                      |
| Space group                                 | P2 <sub>1</sub> /c                                              |
| a/Å                                         | 15.756(4)                                                       |
| b/Å                                         | 14.590(3)                                                       |
| c/Å                                         | 9.628(2)                                                        |
| α/°                                         | 90                                                              |
| β/°                                         | 103.67(2)                                                       |
| γ/°                                         | 90                                                              |
| Volume/Å <sup>3</sup>                       | 2150.5(9)                                                       |
| Z                                           | 4                                                               |
| ρ <sub>calc</sub> /cm <sup>3</sup>          | 1.331                                                           |
| μ/mm <sup>-1</sup>                          | 0.213                                                           |
| F(000)                                      | 904.0                                                           |
| Crystal size/mm <sup>3</sup>                | 0.13 × 0.12 × 0.1                                               |
| Radiation                                   | Mo Kα (λ = 0.71073)                                             |
| 2θ range for data collection/               | 5.172 to 50                                                     |
| Index ranges                                | -18 ≤ h ≤ 16, -17 ≤ k ≤ 13, -11 ≤ l ≤ 11                        |
| Reflections collected                       | 8937                                                            |
| Independent reflections                     | 3783 [R <sub>int</sub> = 0.0935, R <sub>sigma</sub> = 0.1431]   |
| Data/restraints/parameters                  | 3783/0/273                                                      |
| Goodness-of-fit on F <sup>2</sup>           | 1.018                                                           |
| Final R indexes [I ≥ 2σ (I)]                | R <sub>1</sub> = 0.0789, wR <sub>2</sub> = 0.1861               |
| Final R indexes [all data]                  | R <sub>1</sub> = 0.1496, wR <sub>2</sub> = 0.2389               |
| Largest diff. peak/hole / e Å <sup>-3</sup> | 0.43/-0.36                                                      |

## 7. Results for deuterium labeling experiment<sup>5</sup>

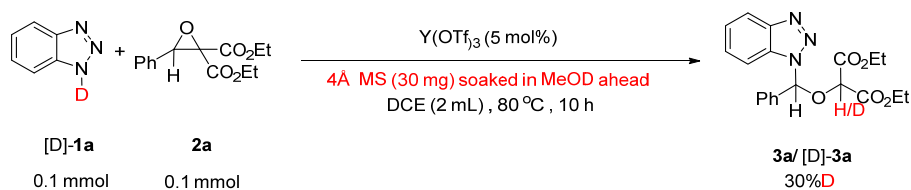

### <sup>1</sup>H NMR spectra of isotopic labeling experiments of the crude product 3a/[D]-3a

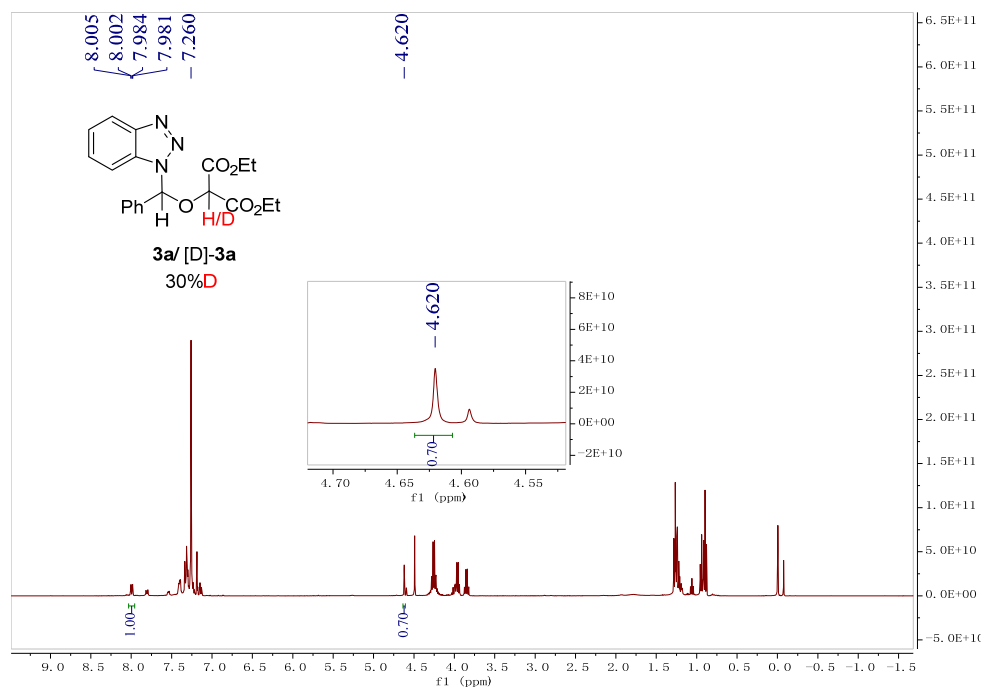

### <sup>1</sup>H NMR spectra of isotopic labeling experiments under standard conditions of the crude product 3a/[D]-3a

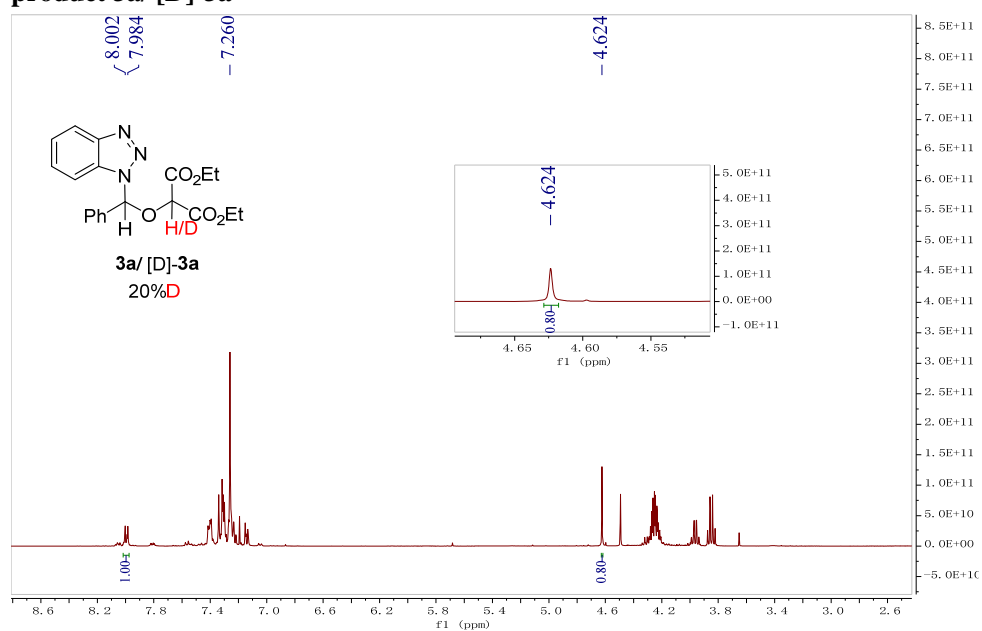

## 8. Optimization of the reaction conditions

**Table S8: Optimization of Lewis acid<sup>a</sup>**

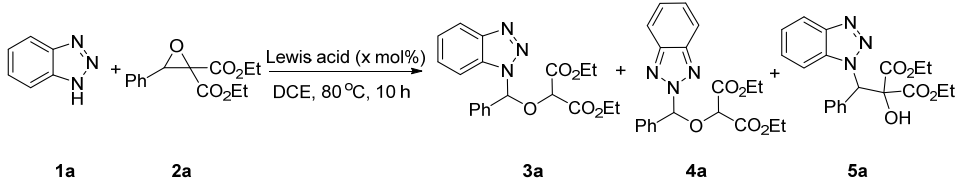

| entry          | Lewis acid                                            | x  | yield (%) <sup>b</sup><br>(3a+4a+5a) | ratio <sup>c</sup><br>(3a/4a/5a) |
|----------------|-------------------------------------------------------|----|--------------------------------------|----------------------------------|
| 1              | -                                                     | -  | NR                                   | -                                |
| 2              | Cu(OTf) <sub>2</sub>                                  | 5  | trace                                | -                                |
| 3 <sup>d</sup> | AlCl <sub>3</sub>                                     | 5  | trace                                | -                                |
| 4 <sup>d</sup> | BF <sub>3</sub> ·Et <sub>2</sub> O                    | 5  | NR                                   | -                                |
| 5 <sup>d</sup> | MgI <sub>2</sub>                                      | 5  | NR                                   | -                                |
| 6              | Ni(ClO <sub>4</sub> ) <sub>2</sub> ·6H <sub>2</sub> O | 5  | trace                                | -                                |
| 7              | Gd(OTf) <sub>3</sub>                                  | 5  | 60                                   | 67:23:10                         |
| 8              | Sc(OTf) <sub>3</sub>                                  | 5  | 33                                   | 82:11:7                          |
| 9              | Y(OTf) <sub>3</sub>                                   | 5  | 99                                   | 96:4:0                           |
| 10             | Y(OTf) <sub>3</sub>                                   | 3  | 36                                   | 67:28:5                          |
| 11             | Y(OTf) <sub>3</sub>                                   | 7  | 93                                   | 92:4:4                           |
| 12             | Y(OTf) <sub>3</sub>                                   | 10 | 88                                   | 95:4:1                           |

<sup>a</sup>Reaction conditions: **1a** (0.1 mmol), **2a** (0.1 mmol), Lewis acid (x mol%), 4Å MS (30 mg) and DCE (2 mL) at 80 °C for 10 h in the pressure tube. <sup>b</sup>The yield was determined by <sup>1</sup>H NMR using CH<sub>2</sub>Br<sub>2</sub> as an internal standard. <sup>c</sup>The ratio was determined by <sup>1</sup>H NMR analysis of the crude product. <sup>d</sup>Solvent was toluene.

**Table S9: Optimization of temperatures<sup>a</sup>**

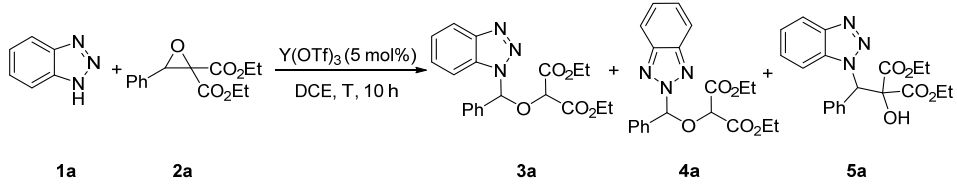

| entry | T (°C) | yield (%) <sup>b</sup><br>(3a+4a+5a) | ratio <sup>c</sup><br>(3a/4a/5a) |
|-------|--------|--------------------------------------|----------------------------------|
| 1     | rt     | trace                                | -                                |
| 2     | 40     | 32                                   | 56:33:11                         |
| 3     | 50     | 36                                   | 56:33:11                         |
| 4     | 60     | 60                                   | 64:29:7                          |

|   |    |    |         |
|---|----|----|---------|
| 5 | 70 | 93 | 87:13:0 |
| 6 | 80 | 99 | 96:4:0  |

<sup>a</sup>Reaction conditions: **1a** (0.1 mmol), **2a** (0.1 mmol), Y(OTf)<sub>3</sub> (5 mol%), 4Å MS (30 mg) and DCE (2 mL) for 10 h in the pressure tube. <sup>b</sup>The yield was determined by <sup>1</sup>H NMR using CH<sub>2</sub>Br<sub>2</sub> as an internal standard. <sup>c</sup>The ratio was determined by <sup>1</sup>H NMR analysis of the crude product.

**Table S10: Optimization of solvents<sup>a</sup>**

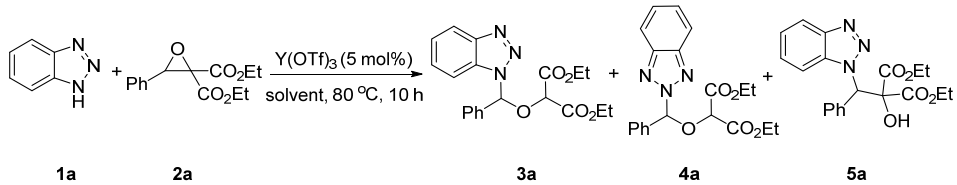

| entry | solvent           | volume (mL) | yield (%) <sup>b</sup> | ratio <sup>c</sup>  |
|-------|-------------------|-------------|------------------------|---------------------|
|       |                   |             | ( <b>3a+4a+5a</b> )    | ( <b>3a/4a/5a</b> ) |
| 1     | Et <sub>2</sub> O | 2           | NR                     | -                   |
| 2     | THF               | 2           | trace                  | -                   |
| 3     | toluene           | 2           | 40                     | 50:35:15            |
| 4     | CHCl <sub>3</sub> | 2           | 24                     | 40:40:20            |
| 5     | DCM               | 2           | 84                     | 75:24:2             |
| 6     | DCE               | 2           | 99                     | 96:4:0              |
| 7     | DCE               | 1           | 68                     | 70:22:8             |
| 8     | DCE               | 0.5         | 66                     | 65:25:10            |

<sup>a</sup>Reaction conditions: **1a** (0.1 mmol), **2a** (0.1 mmol), Y(OTf)<sub>3</sub> (5 mol%), 4Å MS (30 mg) and solvent at 80 °C for 10 h in the pressure tube. <sup>b</sup>The yield was determined by <sup>1</sup>H NMR using CH<sub>2</sub>Br<sub>2</sub> as an internal standard. <sup>c</sup>The ratio was determined by <sup>1</sup>H NMR analysis of the crude product.

**Table S11: Optimizations of molecular sieve<sup>a</sup>**

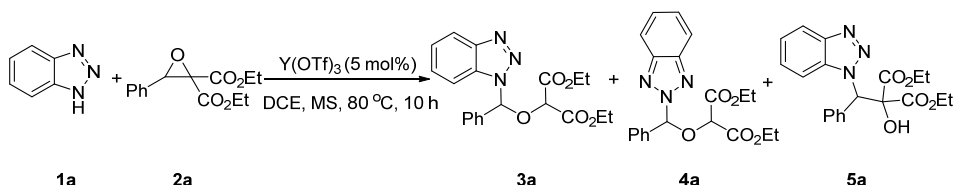

| entry | MS | H <sub>2</sub> O | yield (%) <sup>b</sup> | ratio <sup>c</sup>  |
|-------|----|------------------|------------------------|---------------------|
|       |    |                  | ( <b>3a+4a+5a</b> )    | ( <b>3a/4a/5a</b> ) |
| 1     | 3Å | -                | 83                     | 75:23:2             |
| 2     | 4Å | -                | 99                     | 96:4:0              |
| 3     | 4Å | 10 μL            | 11                     | 65:16:19            |
| 4     | 5Å | -                | 43                     | 50:36:14            |
| 5     | -  | -                | NR                     | -                   |

<sup>a</sup>Reaction conditions: **1a** (0.1 mmol), **2a** (0.1 mmol), Y(OTf)<sub>3</sub> (5 mol%), MS (30 mg) and DCE (2 mL) at 80 °C for 10 h in the pressure tube. <sup>b</sup>The yield was determined by <sup>1</sup>H NMR using CH<sub>2</sub>Br<sub>2</sub> as an internal standard. <sup>c</sup>The ratio was determined by <sup>1</sup>H NMR analysis of the crude product.

## 9. Hammett plot analysis

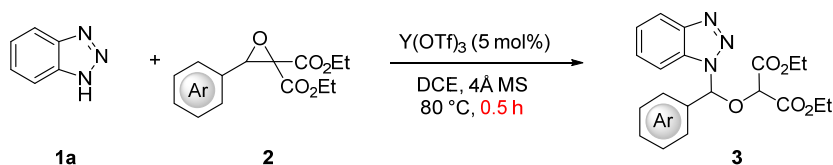

The reaction was performed in a 15 mL pressure tube, aryl oxiranyl dicarboxylates **2** (0.1 mmol, 1.0 equiv) were dissolved in DCE (2 mL), benzotriazole **1a** (12 mg, 0.1 mmol), Y(OTf)<sub>3</sub> (2.7 mg, 0.005 mmol, 5 mol%), and activated 4Å molecular sieve (30 mg) were added respectively and the tube was sealed. The reaction mixture was stirred at 80 °C for 0.5 h. The yields were determined by <sup>1</sup>H NMR using CH<sub>2</sub>Br<sub>2</sub> as an internal standard.

**Table S12: Hammett study of relative initial rates of *para*-substituent**

| entry | substituent               | yield (%) | $\sigma$ | $\log(Y_x/Y_H)$ |
|-------|---------------------------|-----------|----------|-----------------|
| 1     | <i>p</i> -CH <sub>3</sub> | 78        | -0.170   | 0.494           |
| 2     | H                         | 25        | 0        | 0               |
| 3     | <i>p</i> -Cl              | 12        | 0.227    | -0.319          |
| 4     | <i>p</i> -I               | 4         | 0.276    | -0.796          |

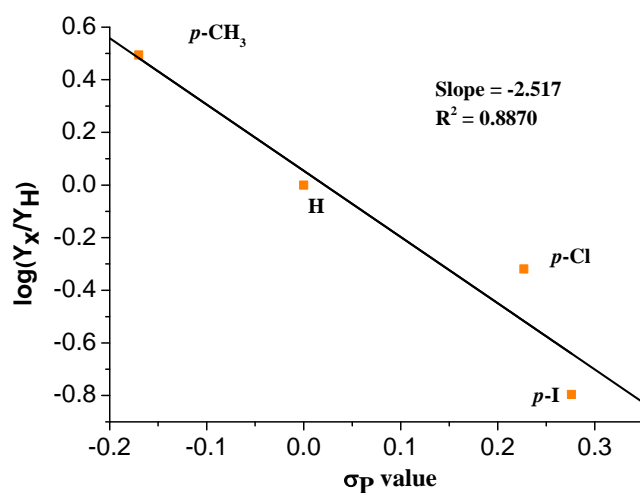

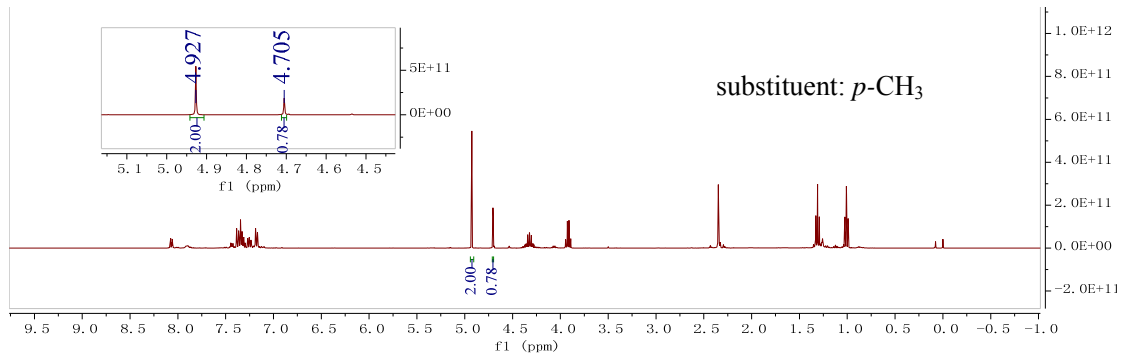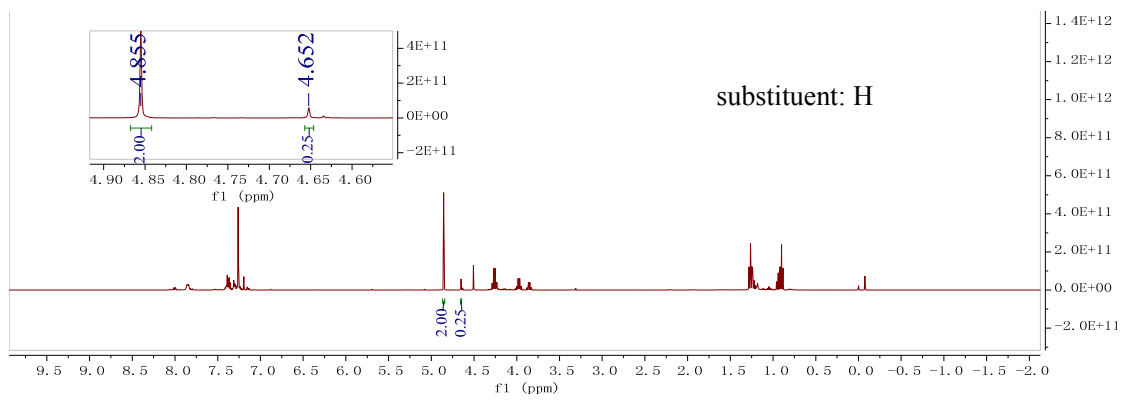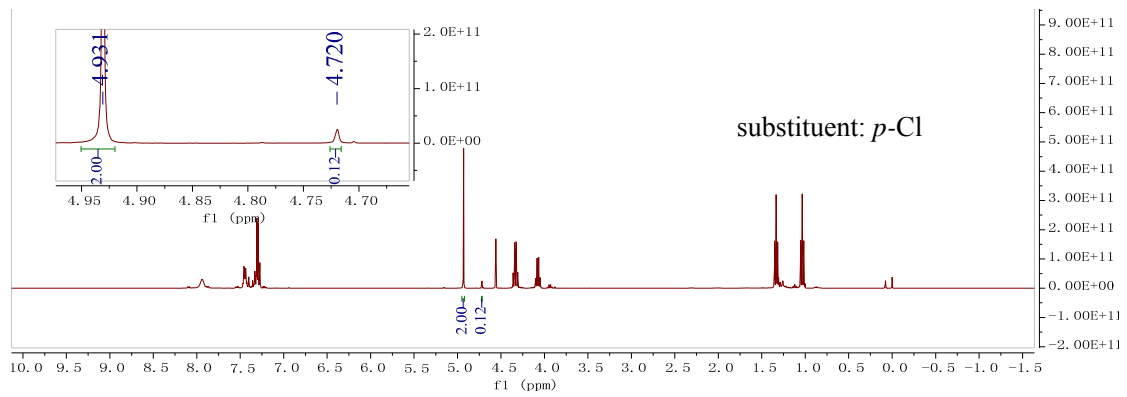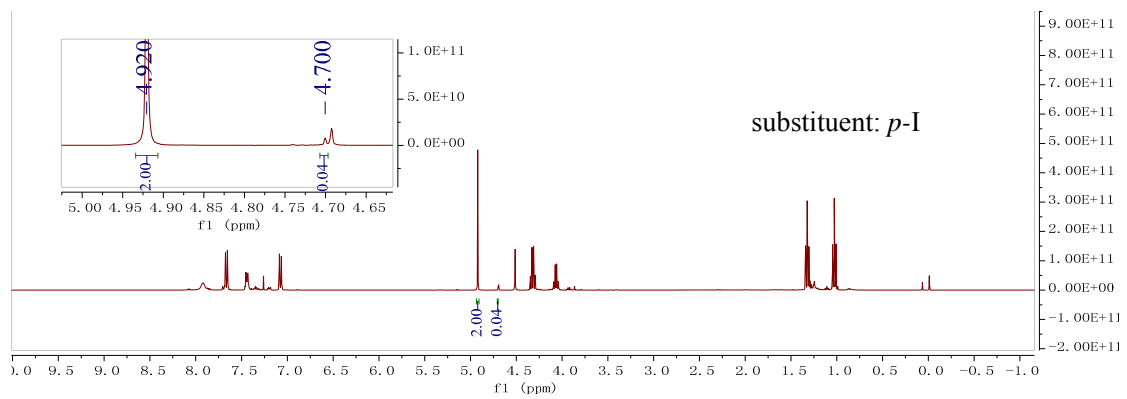



**Table S13: The Hammett study of relative initial rates of *meta*-substituent**

| entry | substituent               | yield (%) | $\sigma$ | $\log(Y_x/Y_H)$ |
|-------|---------------------------|-----------|----------|-----------------|
| 1     | <i>m</i> -CH <sub>3</sub> | 41        | -0.069   | 0.215           |
| 2     | H                         | 25        | 0        | 0               |
| 3     | <i>m</i> -F               | 2         | 0.337    | -1.097          |
| 4     | <i>m</i> -Br              | 2         | 0.391    | -1.097          |

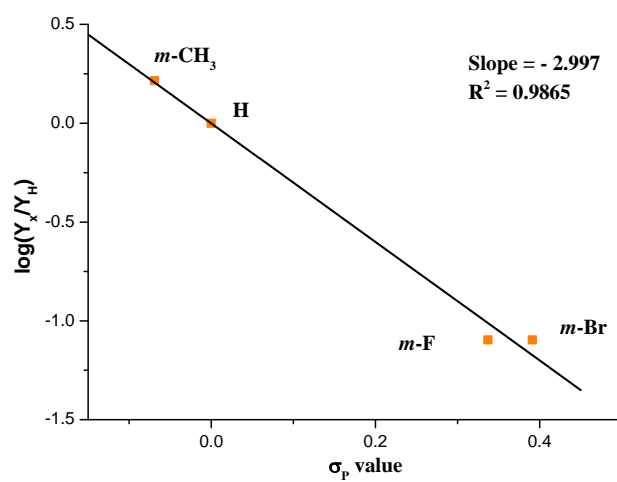

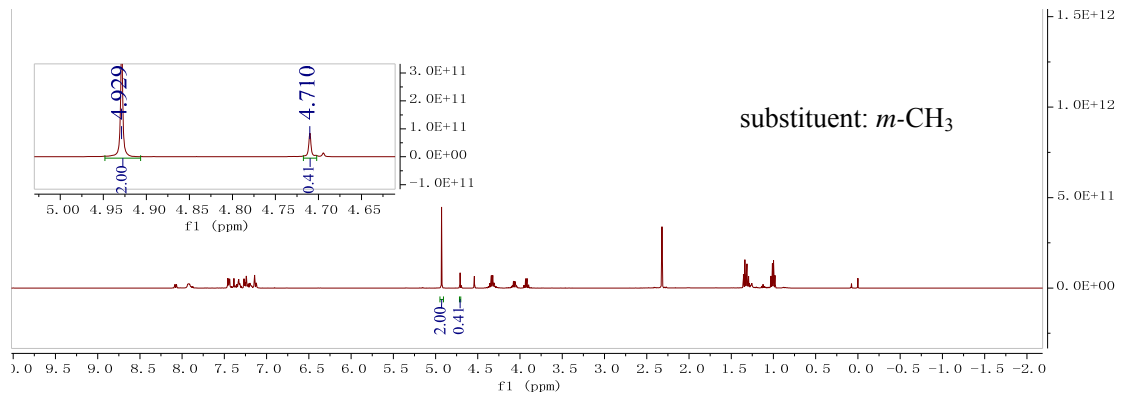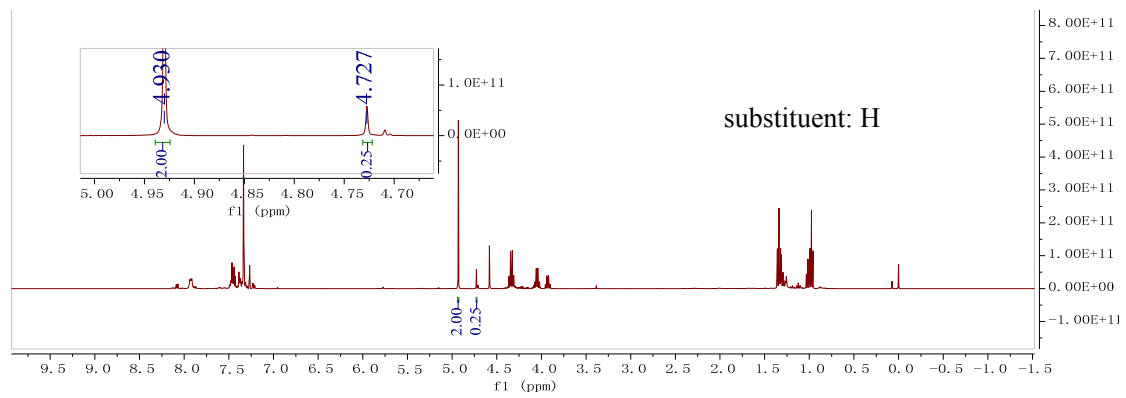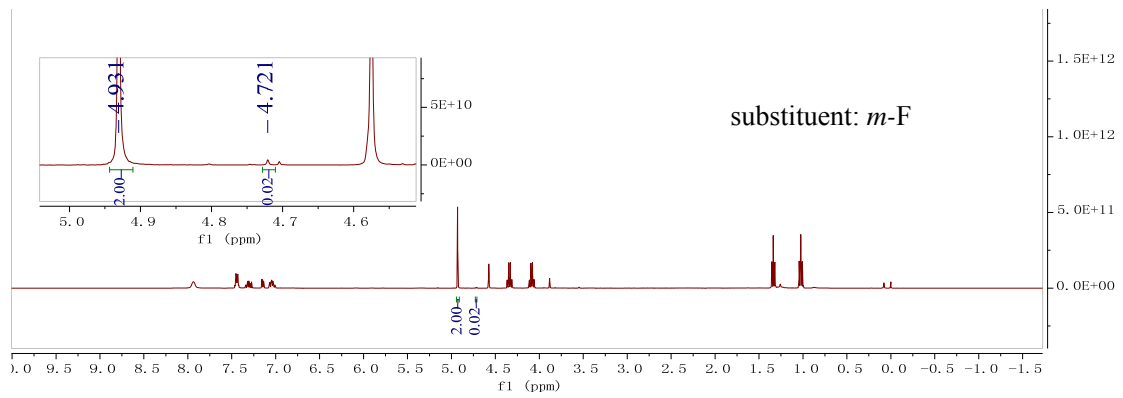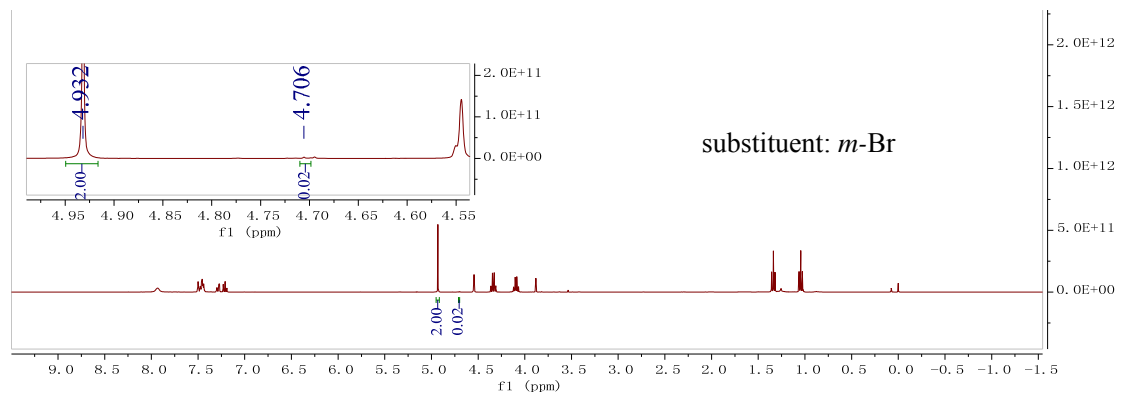

## 10. Kinetic experiments

### 1) Order in **1a**

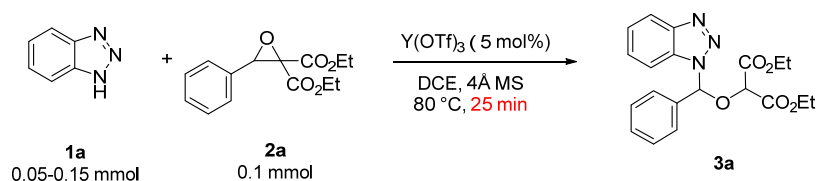

The reaction was performed in a 15 mL pressure tube, **2a** (0.1 mmol, 1.0 equiv) were dissolved in DCE (2 mL), benzotriazole **1a** (6-18 mg, 0.05-0.15 mmol),  $Y(OTf)_3$  (2.7 mg, 0.005 mmol, 5 mol%), and activated 4Å molecular sieve (30 mg) were added respectively and the tube was sealed. The reaction mixture was stirred at 80 °C for 25 min. The yields were determined by  $^1H$  NMR using  $CH_2Br_2$  as an internal standard.

| entry | <b>1a</b> (mmol) | yield (%) |
|-------|------------------|-----------|
| 1     | 0                | 0         |
| 2     | 0.05             | 20        |
| 3     | 0.075            | 20        |
| 4     | 0.1              | 20        |
| 5     | 0.125            | 20        |
| 6     | 0.15             | 20        |

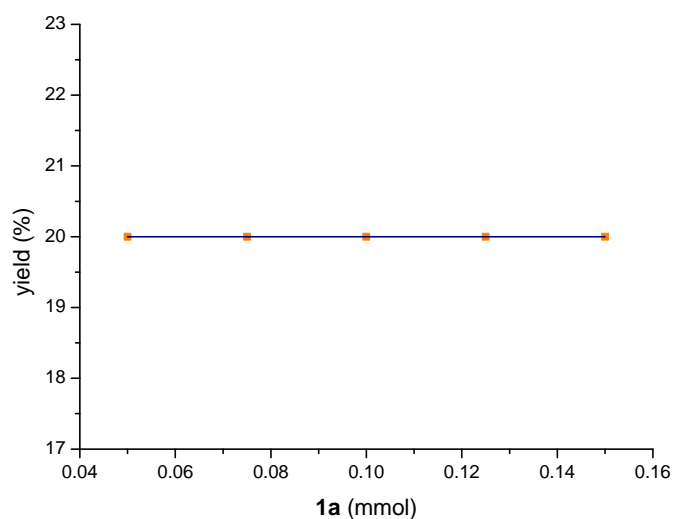

**Figure S11.** Plot of initial rates versus concentration of **1a**.

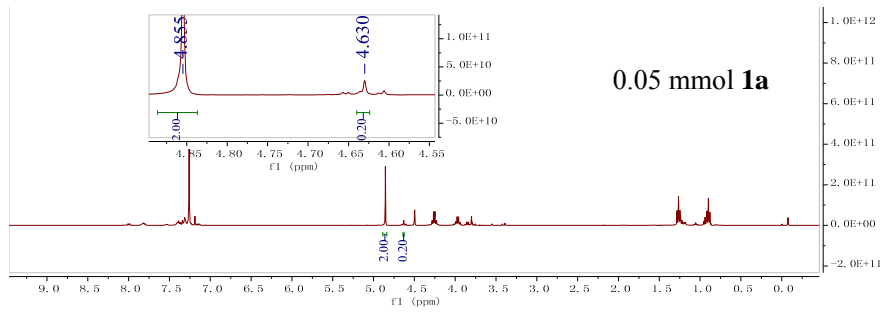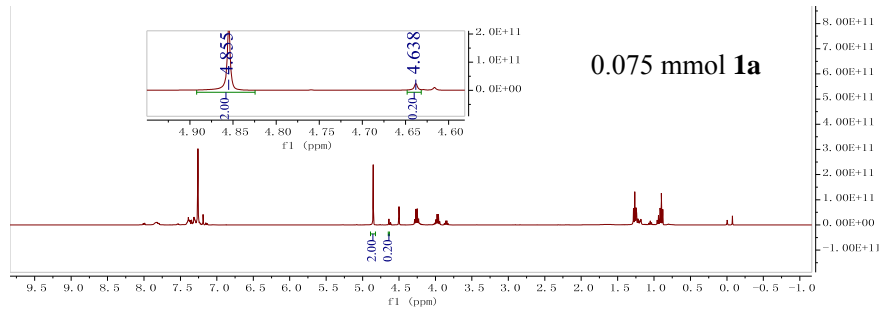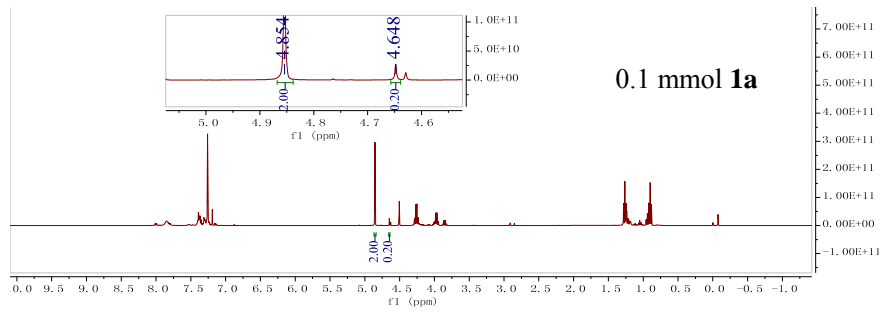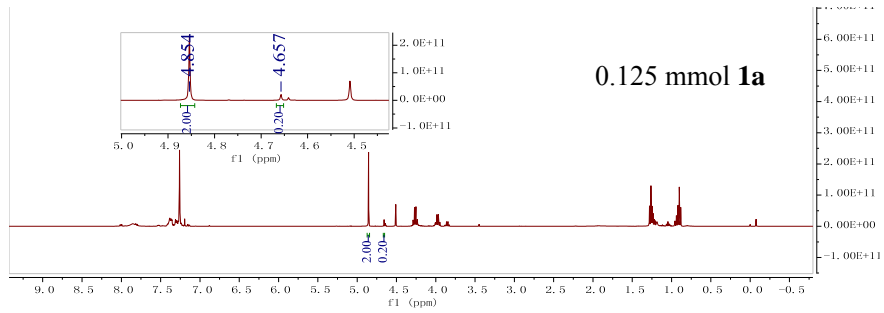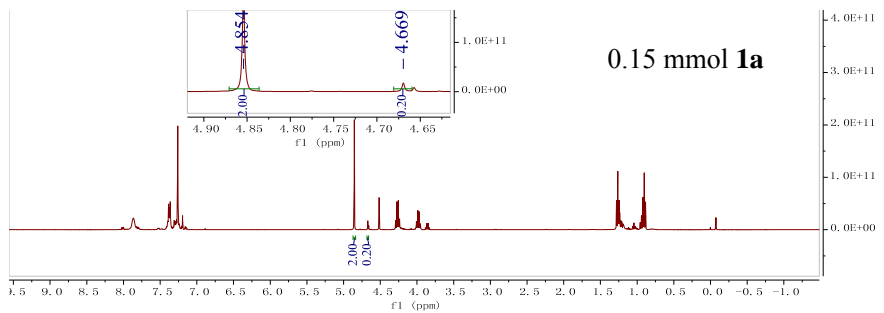

## 2) Order in **2a**

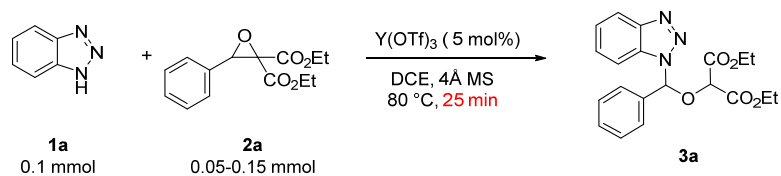

The reaction was performed in a 15 mL pressure tube, **2a** (13.2-39.6mg, 0.05-0.15 mmol) were dissolved in DCE (2 mL), benzotriazole **1a** (12 mg, 0.1 mmol), Y(OTf)<sub>3</sub> (2.7 mg, 0.005 mmol, 5 mol%), and activated 4Å molecular sieve (30 mg) were added respectively and the tube was sealed. The reaction mixture was stirred at 80 °C for 25 min. The yields were determined by <sup>1</sup>H NMR using CH<sub>2</sub>Br<sub>2</sub> as an internal standard.

| entry | <b>2a</b> (mmol) | yield (%) |
|-------|------------------|-----------|
| 1     | 0                | 0         |
| 2     | 0.05             | 12        |
| 3     | 0.075            | 15        |
| 4     | 0.1              | 20        |
| 5     | 0.125            | 25        |
| 6     | 0.15             | 26        |

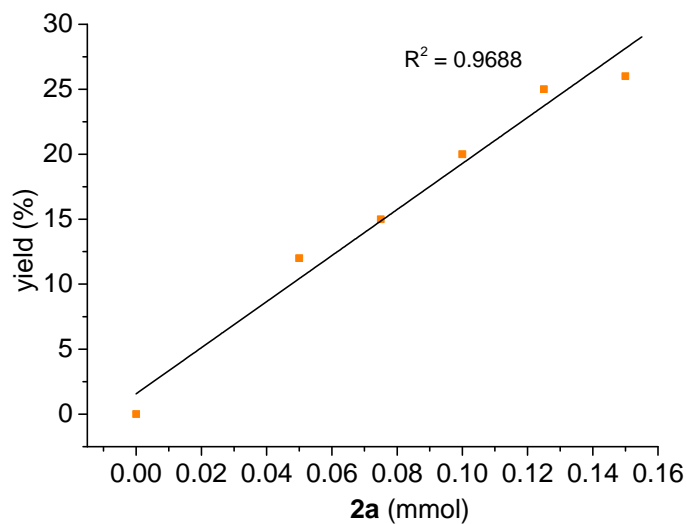

**Figure S12.** Plot of initial rates versus concentration of **2a**.

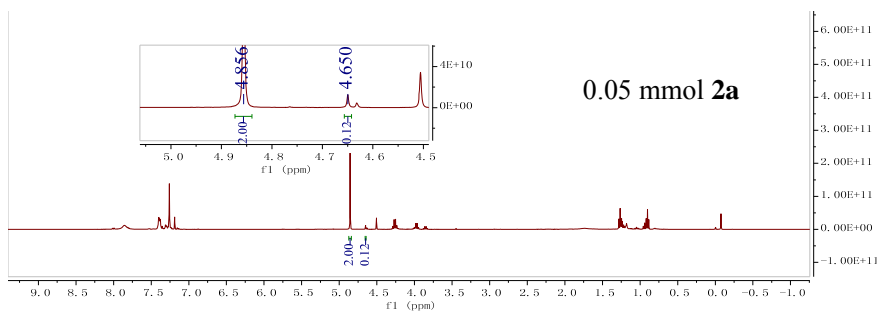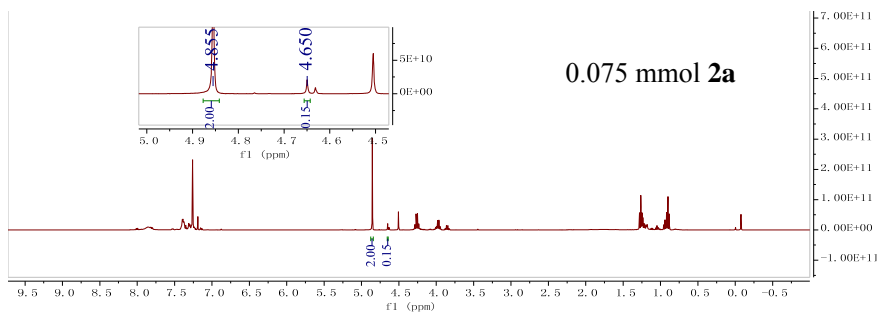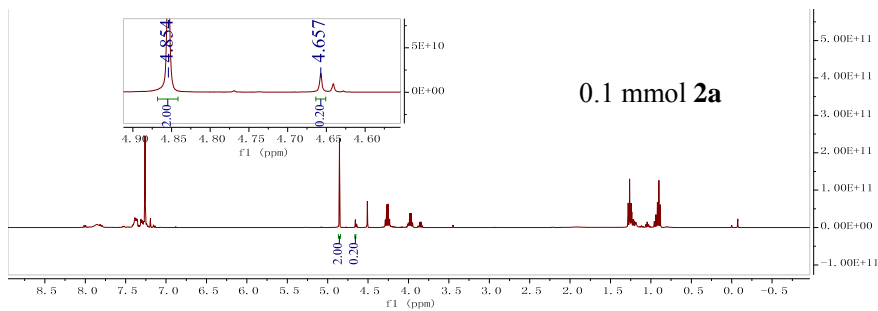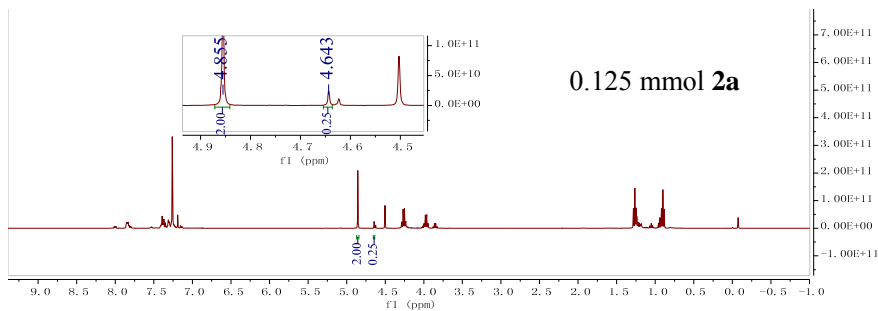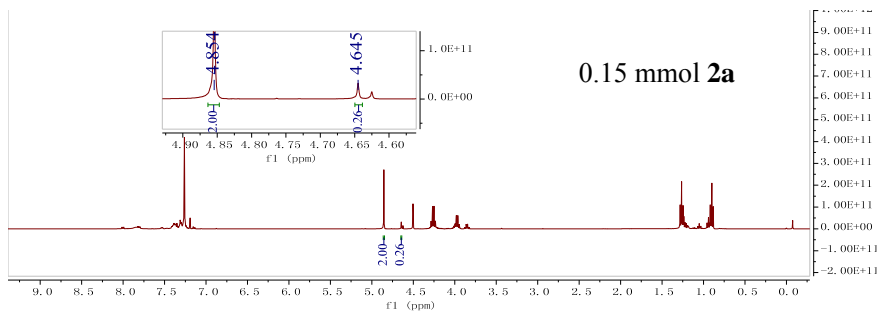

### 3) Order in $Y(OTf)_3$

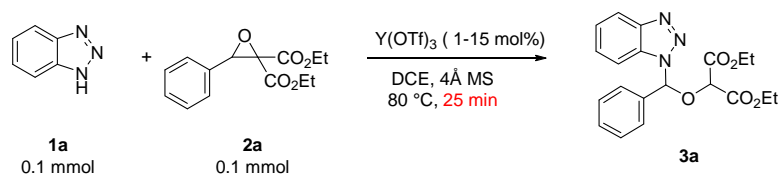

The reaction was performed in a 15 mL pressure tube, **2a** (0.1 mmol) were dissolved in DCE (2 mL), benzotriazole **1a** (12 mg, 0.1 mmol),  $Y(OTf)_3$  (0.54-8.1 mg, 1-15 mol%), and activated 4Å molecular sieve (30 mg) were added respectively and the tube was sealed. The reaction mixture was stirred at 80 °C for 25 min. The yields were determined by  $^1H$  NMR using  $CH_2Br_2$  as an internal standard.

| entry | $Y(OTf)_3$ (mol%) | yield (%) |
|-------|-------------------|-----------|
| 1     | 0                 | 0         |
| 2     | 1                 | 4         |
| 3     | 2.5               | 10        |
| 4     | 3                 | 13        |
| 5     | 4                 | 18        |
| 6     | 5                 | 20        |
| 7     | 7.5               | 32        |
| 8     | 10                | 39        |
| 9     | 12.5              | 46        |
| 10    | 15                | 53        |

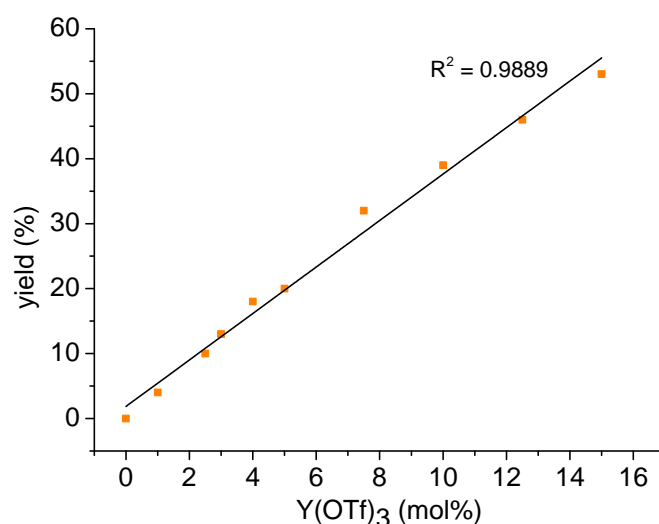

**Figure S13.** Plot of initial rates versus concentration of  $Y(OTf)_3$ .

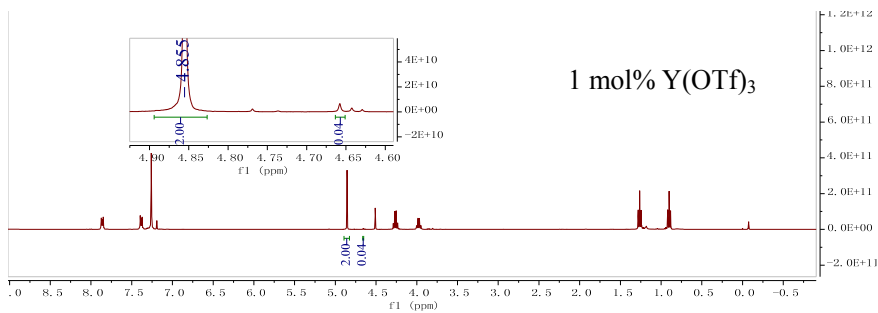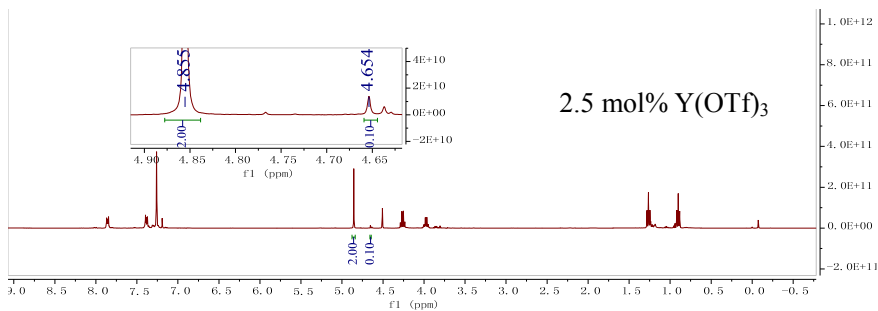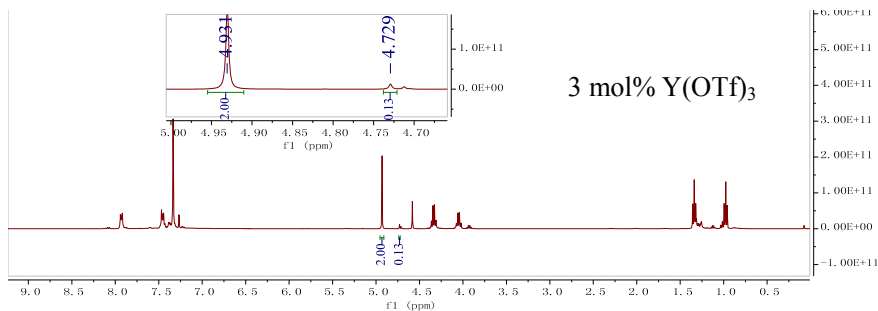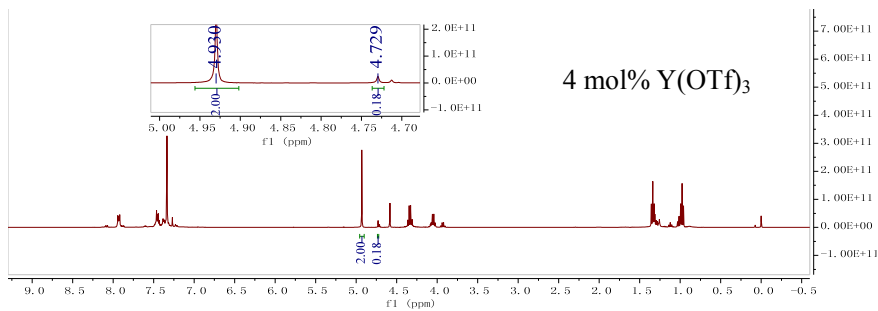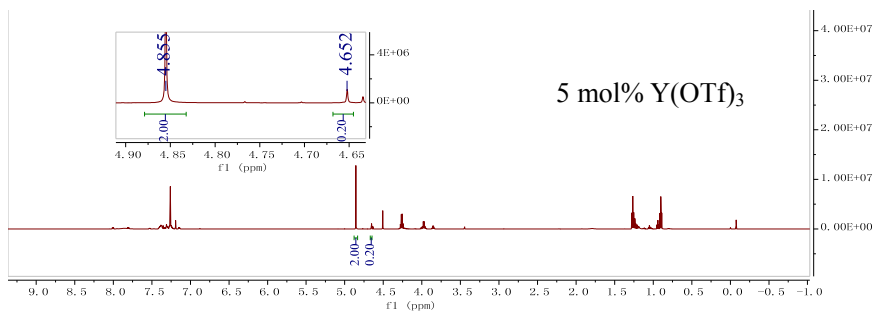



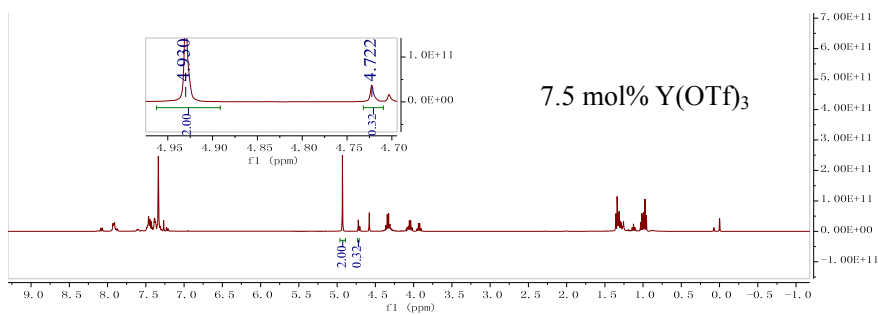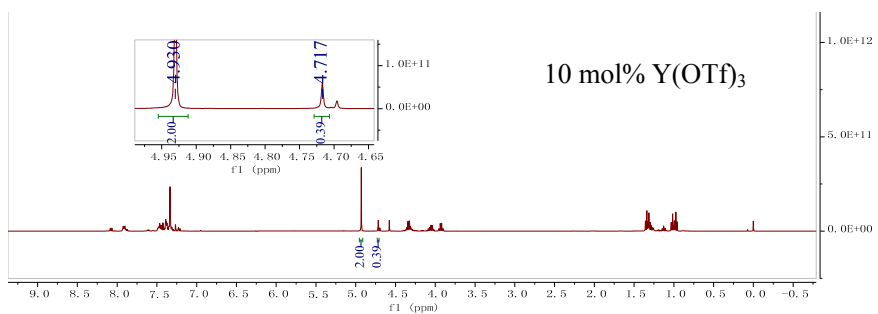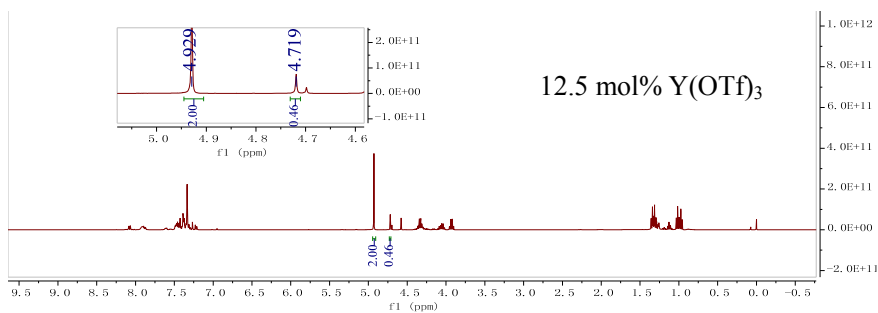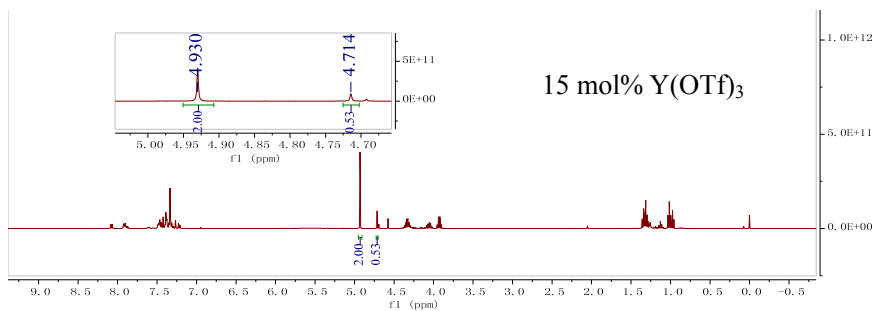

## 11. Electronic conductivity experiments

The electronic conductivity of the mixture of D-A oxirane **2a** with Y(OTf)<sub>3</sub> (Figure S14) and Sc(OTf)<sub>3</sub> (Figure S15) were tracked in the reaction. The test temperature is 40 °C, the solvent is DCE. Plot the measured data and find the linear intersection point is the conductivity.

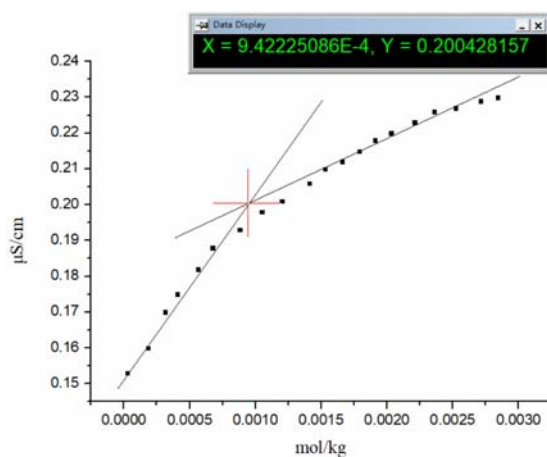

Figure S14

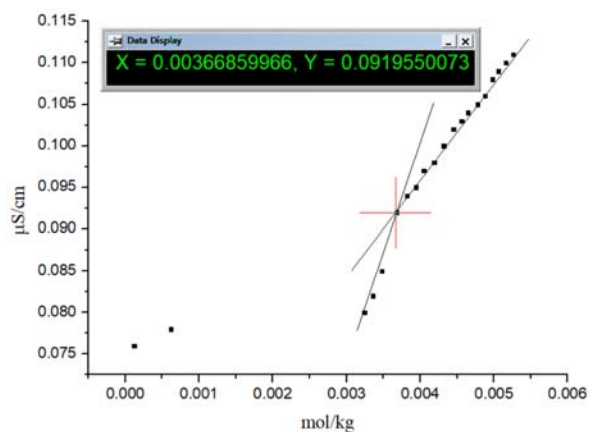

Figure S15

| entry | catalyst             | T (°C) | solvent | concentration (mol·kg <sup>-1</sup> ) | conductivity (μS·cm <sup>-1</sup> ) |
|-------|----------------------|--------|---------|---------------------------------------|-------------------------------------|
| 1     | Y(OTf) <sub>3</sub>  | 40     | DCE     | 0.077                                 | 0.200                               |
| 2     | Sc(OTf) <sub>3</sub> | 40     | DCE     | 0.00368                               | 0.092                               |

## 12. Conversion of 4a to 3a

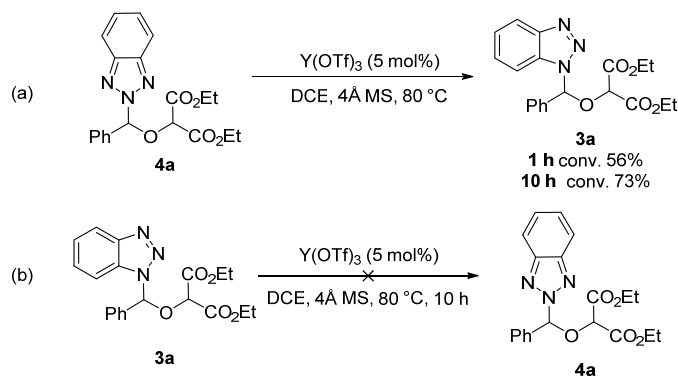

The reaction was performed in a 15 mL pressure tube, **3a** or **4a** (0.05mmol) were dissolved in DCE (1 mL), Y(OTf)<sub>3</sub> (1.4 mg, 5 mol%), and activated 4Å molecular sieve (15 mg) were added respectively and the tube was sealed. The reaction mixture was stirred at 80 °C. The conversion rates were determined by <sup>1</sup>H NMR using CH<sub>2</sub>Br<sub>2</sub> as an internal standard.

(a) When *N*<sup>2</sup> alkylated product **4a** was treated with Y(OTf)<sub>3</sub> in DCE with 4Å MS at 80 °C for 1 h, the *N*<sup>1</sup> alkylated product **3a** was detected in 56% conversion. When the reaction was prolonged to 10 h, *N*<sup>1</sup> alkylated product **3a** was observed with 73% conversion.

(b) By contrast, when *N*<sup>1</sup> alkylated product **3a** was treated with Y(OTf)<sub>3</sub> in DCE with 4Å MS at 80 °C for 10 h, the *N*<sup>2</sup> alkylated product **4a** could not be detected.

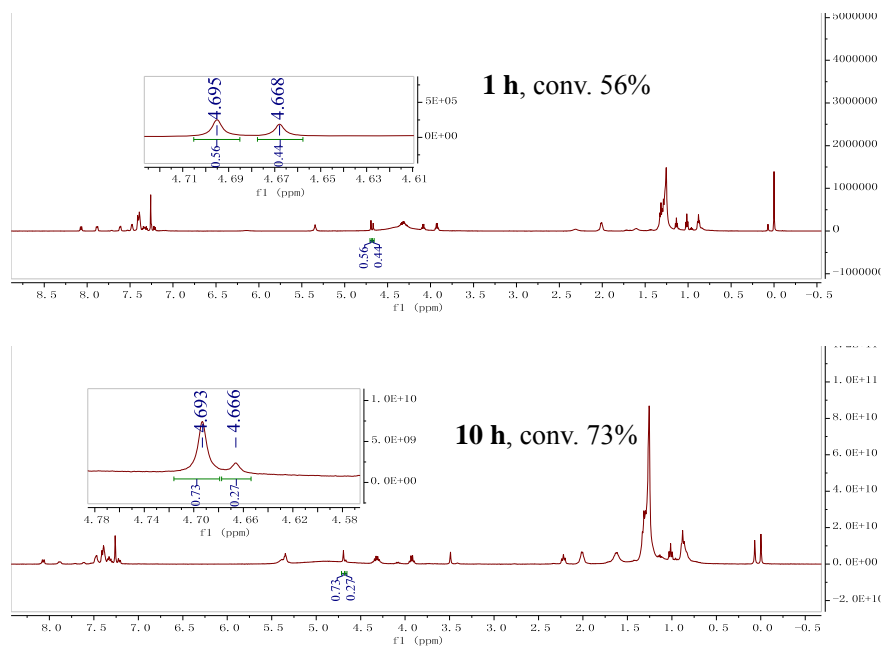

### 13. Unsuccessful substrates

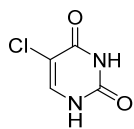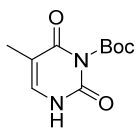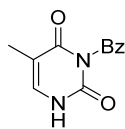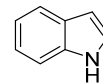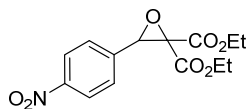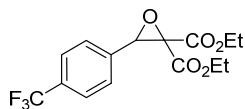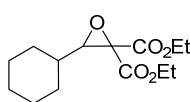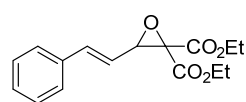

## 14. Characterization data of new compounds

### Diethyl 2-((1*H*-benzo[*d*][1,2,3]triazol-1-yl)(phenyl)methoxy)malonate (**3a**)

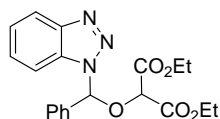

**3a**

Prepared according to general procedure A using phenyl oxiranyl dicarboxylate **2a** (26.4 mg, 0.1 mmol, 1.0 equiv), benzotriazole **1a** (12 mg, 0.1 mmol), Y(OTf)<sub>3</sub> (2.7 mg, 0.005 mmol, 5 mol%), and activated 4Å molecular sieve (30 mg) in DCE (2 mL) at 80 °C for 10 h. Purification by preparative thin layer chromatography using Pet/EtOAc system (Pet/EtOAc, 4/1, v/v) to give product **3a** as a colorless solid (36.1 mg, 94% yield).

**m.p.** : 74.5 - 79.6 °C.

**R<sub>f</sub>** = 0.56 (Pet/EtOAc, 4/1, v/v).

**<sup>1</sup>H NMR** (400 MHz, CDCl<sub>3</sub>) δ 8.08 - 8.05 (m, 1H), 7.49 - 7.46 (m, 2H), 7.41 (s, 1H), 7.40 - 7.36 (m, 3H), 7.34 - 7.29 (m, 2H), 7.22 - 7.20 (m, 1H), 4.70 (s, 1H), 4.37 - 4.28 (m, 2H), 3.92 (q, *J* = 7.2 Hz, 2H), 1.31 (t, *J* = 7.2 Hz, 3H), 1.01 (t, *J* = 7.2 Hz, 3H).

**<sup>13</sup>C NMR** (100 MHz, CDCl<sub>3</sub>) δ 165.9, 164.9, 147.2, 134.8, 131.4, 129.6, 128.8, 128.0, 126.3, 124.6, 120.1, 112.1, 89.3, 76.4, 62.6, 62.2, 14.2, 13.7.

**HRMS** (ESI) *m/z*: [M + Na]<sup>+</sup> Calcd for C<sub>20</sub>H<sub>21</sub>N<sub>3</sub>NaO<sub>5</sub> 406.1373; Found 406.1373.

**IR**(neat): 2988, 1740, 1613, 1500, 1450, 1250, 1017, 734.

**Crude <sup>1</sup>H NMR** Ratio of *N*<sup>1</sup>/*N*<sup>2</sup> = 96:4

**Diethyl 2-((2*H*-benzo[*d*][1,2,3]triazol-2-yl)(phenyl)methoxy)malonate (**4a**)**

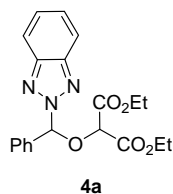

Prepared according to general procedure A using phenyl oxiranyl dicarboxylate **2a** (132 mg, 0.5 mmol, 1.0 equiv), benzotriazole **1a** (60 mg, 1 mmol), Y(OTf)<sub>3</sub> (13.5 mg, 0.05 mmol, 5 mol%), and activated 4Å molecular sieve (150 mg) in DCM (10 mL) at 80 °C for 10 h. Purification by preparative thin layer chromatography using Pet/EtOAc system (Pet/EtOAc, 4/1, v/v) to give product **4a** as a thick colorless oil (38.3 mg, 20% yield).

**R<sub>f</sub>** = 0.59 (Pet/EtOAc, 4/1, v/v).

**<sup>1</sup>H NMR** (400 MHz, CDCl<sub>3</sub>) δ 7.82 - 7.79 (m, 2H), 7.55 - 7.53 (m, 2H), 7.34 - 7.30 (m, 5H), 7.18 (s, 1H), 4.60 (s, 1H), 4.26 - 4.16 (m, 2H), 4.00 (q, *J* = 7.2 Hz, 2H), 1.20 (t, *J* = 7.2 Hz, 3H), 1.05 (t, *J* = 7.2 Hz, 3H).

**<sup>13</sup>C NMR** (100 MHz, CDCl<sub>3</sub>) δ 165.8, 164.8, 144.7, 135.1, 129.8, 128.6, 127.3, 126.9, 118.8, 93.8, 76.7, 62.6, 62.3, 14.1, 13.9.

**HRMS** (ESI) *m/z*: [M + Na]<sup>+</sup> Calcd for C<sub>20</sub>H<sub>21</sub>N<sub>3</sub>NaO<sub>5</sub> 406.1373; Found 406.1373.

**IR**(neat): 2985, 1740, 1498, 1450, 1240, 1110, 852.

**Diethyl 2-((1*H*-benzo[*d*][1,2,3]triazol-1-yl)(phenyl)methyl)-2-hydroxymalonate (5a)**

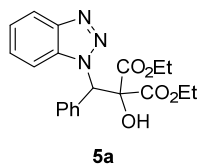

Prepared according to general procedure A using phenyl oxiranyl dicarboxylate **2a** (264 mg, 1 mmol, 1.0 equiv), benzotriazole **1a** (120 mg, 1 mmol), Y(OTf)<sub>3</sub> (27 mg, 0.05 mmol, 5 mol%), and activated 4Å molecular sieve (300 mg) in DCM (20 mL) at room temperature for 24 h. Purification by preparative thin layer chromatography using Pet/EtOAc system (Pet/EtOAc, 3/1, v/v) to give product **5a** as a colorless solid (42.1 mg, 11% yield).

**m.p.** : 76.8 - 82.1 °C.

**R<sub>f</sub>** = 0.42 (Pet/EtOAc, 4/1, v/v).

**<sup>1</sup>H NMR** (400 MHz, CDCl<sub>3</sub>) δ 8.01 - 7.99 (m, 1H), 7.55 - 7.53 (m, 2H), 7.34 - 7.29 (m, 6H), 6.93 (s, 1H), 4.80 (s, 1H), 4.18 (dq, *J* = 7.2, 29.6 Hz, 4H), 1.17 (t, *J* = 7.2 Hz, 3H), 1.10 (t, *J* = 7.2 Hz, 3H).

**<sup>13</sup>C NMR** (100 MHz, CDCl<sub>3</sub>) δ 168.2, 167.2, 145.9, 133.3, 133.2, 129.3, 129.2, 128.7, 127.8, 124.3, 120.0, 111.2, 82.6, 65.9, 63.8, 63.3, 13.9, 13.8.

**HRMS** (ESI) *m/z*: [M + Na]<sup>+</sup> Calcd for C<sub>20</sub>H<sub>21</sub>N<sub>3</sub>NaO<sub>5</sub> 406.1373; Found 406.1375.

**IR**(neat): 3360, 2920, 1740, 1629, 1494, 1453, 1260, 1030, 744.

**Diethyl 2-((1*H*-benzo[*d*][1,2,3]triazol-1-yl)(*o*-tolyl)methoxy)malonate (**3b**)**

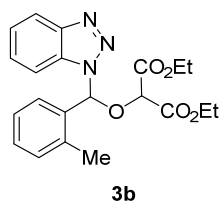

Prepared according to general procedure A using aryl oxiranyl dicarboxylate **2b** (27.8 mg, 0.1 mmol, 1.0 equiv), benzotriazole **1a** (12 mg, 0.1 mmol), Y(OTf)<sub>3</sub> (2.7 mg, 0.005 mmol, 5 mol%), and activated 4Å molecular sieve (30 mg) in DCE (2 mL) at 80 °C for 10 h. Purification by preparative thin layer chromatography using Pet/EtOAc system (Pet/EtOAc, 3/1, v/v) to give product **3b** as a colorless solid (33.4 mg, 84% yield).

**m.p.** : 65.6 - 70.3 °C.

**R<sub>f</sub>** = 0.50 (Pet/EtOAc, 4/1, v/v).

**<sup>1</sup>H NMR** (400 MHz, CDCl<sub>3</sub>) δ 8.21 (d, *J* = 8.0 Hz, 1H), 8.03 (d, *J* = 8.0 Hz, 1H), 7.44 (s, 1H), 7.42 - 7.25 (m, 4H), 7.12 - 7.09 (m, 2H), 4.81 (s, 1H), 4.35 - 4.27 (m, 2H), 3.92 (q, *J* = 7.2 Hz, 2H), 1.93 (s, 3H), 1.30 (t, *J* = 7.2 Hz, 3H), 1.02 (t, *J* = 7.2 Hz, 3H).

**<sup>13</sup>C NMR** (150 MHz, CDCl<sub>3</sub>) δ 165.8, 165.1, 147.0, 136.2, 132.4, 131.5, 131.3, 129.8, 128.0, 126.7, 126.3, 124.5, 120.1, 111.7, 87.2, 76.4, 62.6, 62.2, 19.0, 14.2, 13.8.

**HRMS** (ESI) *m/z*: [M + Na]<sup>+</sup> Calcd for C<sub>21</sub>H<sub>23</sub>N<sub>3</sub>NaO<sub>5</sub> 420.1530; Found 420.1524.

**IR**(neat): 2988, 1765, 1730, 1606, 1447, 1205, 1078, 810, 750.

**Crude <sup>1</sup>H NMR** Ratio of *N*<sup>1</sup>/*N*<sup>2</sup> = 94:6



**Diethyl 2-((1*H*-benzo[*d*][1,2,3]triazol-1-yl)(*m*-tolyl)methoxy)malonate (**3c**)**

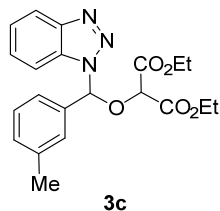

Prepared according to general procedure A using aryl oxiranyl dicarboxylate **2c** (27.8 mg, 0.1 mmol, 1.0 equiv), benzotriazole **1a** (12 mg, 0.1 mmol), Y(OTf)<sub>3</sub> (2.7 mg, 0.005 mmol, 5 mol%), and activated 4Å molecular sieve (30 mg) in DCE (2 mL) at 80 °C for 10 h. Purification by preparative thin layer chromatography using Pet/EtOAc system (Pet/EtOAc, 3/1, v/v) to give product **3c** as a thick colorless oil (31.8 mg, 80% yield).

**R<sub>f</sub>** = 0.55 (Pet/EtOAc, 4/1, v/v).

**<sup>1</sup>H NMR** (400 MHz, CDCl<sub>3</sub>) δ 8.08 - 8.06 (m, 1H), 7.37 (s, 1H), 7.35 - 7.30 (m, 3H), 7.27 - 7.23 (m, 3H), 7.20 - 7.17 (m, 1H), 4.68 (s, 1H), 4.37 - 4.28 (m, 2H), 3.92 (q, *J* = 7.2 Hz, 2H), 2.33 (s, 3H), 1.32 (t, *J* = 7.2 Hz, 3H), 1.01 (t, *J* = 7.2 Hz, 3H).

**<sup>13</sup>C NMR** (100 MHz, CDCl<sub>3</sub>) δ 165.8, 164.9, 147.2, 138.6, 134.7, 131.4, 130.3, 128.7, 127.9, 126.9, 124.6, 123.3, 120.0, 112.2, 89.4, 76.4, 62.6, 62.2, 21.6, 14.1, 13.7.

**HRMS** (ESI) *m/z*: [M + Na]<sup>+</sup> Calcd for C<sub>21</sub>H<sub>23</sub>N<sub>3</sub>NaO<sub>5</sub> 420.1530; Found 420.1530.

**IR**(neat): 2983, 1743, 1591, 1492, 1450, 1235, 1076, 820, 747.

**Crude <sup>1</sup>H NMR** Ratio of *N*<sup>1</sup>/*N*<sup>2</sup> = 92:8

**Diethyl 2-((1*H*-benzo[*d*][1,2,3]triazol-1-yl)(*p*-tolyl)methoxy)malonate (**3d**)**

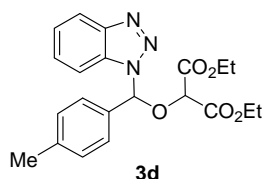

Prepared according to general procedure A using aryl oxiranyl dicarboxylate **2d** (27.8 mg, 0.1 mmol, 1.0 equiv), benzotriazole **1a** (12 mg, 0.1 mmol), Y(OTf)<sub>3</sub> (2.7 mg, 0.005 mmol, 5 mol%), and activated 4Å molecular sieve (30 mg) in DCE (2 mL) at 80 °C for 10 h. Purification by preparative thin layer chromatography using Pet/EtOAc system (Pet/EtOAc, 3/1, v/v) to give product **3d** as a thick colorless oil (34.6 mg, 87% yield).

**R<sub>f</sub>** = 0.50 (Pet/EtOAc, 4/1, v/v).

**<sup>1</sup>H NMR** (400 MHz, CDCl<sub>3</sub>) δ 8.07 - 8.05 (m, 1H), 7.37 - 7.29 (m, 5H), 7.25 - 7.22 (m, 1H), 7.18 (d, *J* = 8 Hz, 2H), 4.68 (s, 1H), 4.36 - 4.27 (m, 2H), 3.92 (q, *J* = 7.2 Hz, 2H), 2.35 (s, 3H), 1.31 (t, *J* = 7.2 Hz, 3H), 1.00 (t, *J* = 7.2 Hz, 3H).

**<sup>13</sup>C NMR** (100 MHz, CDCl<sub>3</sub>) δ 165.9, 165.0, 147.2, 139.5, 131.8, 131.4, 129.5, 127.9, 126.2, 124.6, 120.0, 112.2, 89.5, 76.5, 62.6, 62.2, 21.4, 14.2, 13.7.

**HRMS** (ESI) *m/z*: [M + Na]<sup>+</sup> Calcd for C<sub>21</sub>H<sub>23</sub>N<sub>3</sub>NaO<sub>5</sub> 420.1530; Found 420.1530.

**IR**(neat): 2983, 1743, 1614, 1492, 1450, 1236, 1077, 830, 747.

**Crude <sup>1</sup>H NMR** Ratio of *N*<sup>1</sup>/*N*<sup>2</sup> > 95:5

**diethyl 2-((1*H*-benzo[*d*][1,2,3]triazol-1-yl)(3-methoxyphenyl)methoxy)malonate (**3e**)**

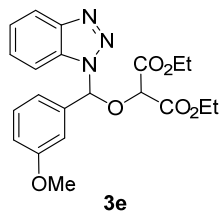

Prepared according to general procedure A using aryl oxiranyl dicarboxylate **2e** (29.4 mg, 0.1 mmol, 1.0 equiv), benzotriazole **1a** (12 mg, 0.1 mmol), Y(OTf)<sub>3</sub> (2.7 mg, 0.005 mmol, 5 mol%), and activated 4Å molecular sieve (30 mg) in DCE (2 mL) at 80 °C for 10 h. Purification by preparative thin layer chromatography using Pet/EtOAc system (Pet/EtOAc, 3/1, v/v) to give product **3e** as a thick colorless oil (31.4 mg, 76% yield).

**R<sub>f</sub>** = 0.40 (Pet/EtOAc, 3/1, v/v).

**<sup>1</sup>H NMR** (600 MHz, CDCl<sub>3</sub>) δ 8.07 - 8.05 (m, 1H), 7.37 (s, 1H), 7.35 - 7.31 (m, 2H), 7.29 - 7.26 (m, 2H), 7.09 (s, 1H), 7.00 (d, *J* = 7.8 Hz, 1H), 6.91 (dd, *J* = 3.0, 8.4 Hz, 1H), 4.68 (s, 1H), 4.36 - 4.27 (m, 2H), 3.92 (q, *J* = 7.2 Hz, 1H), 3.77 (s, 3H), 1.31 (t, *J* = 7.2 Hz, 3H), 1.01 (t, *J* = 7.2 Hz, 3H).

**<sup>13</sup>C NMR** (150 MHz, CDCl<sub>3</sub>) δ 165.8, 164.8, 160.0, 147.1, 136.3, 131.4, 129.9, 127.9, 124.6, 120.0, 118.5, 115.1, 112.1, 112.0, 89.1, 76.5, 62.5, 62.1, 55.4, 14.1, 13.7.

**HRMS** (ESI) *m/z*: [M + Na]<sup>+</sup> Calcd for C<sub>21</sub>H<sub>23</sub>N<sub>3</sub>NaO<sub>6</sub> 436.1479; Found 436.1479.

**IR**(neat): 2983, 1743, 1603, 1236, 1492, 1451, 1076, 814, 748.

**Crude <sup>1</sup>H NMR** Ratio of *N*<sup>1</sup>/*N*<sup>2</sup> = 93:7

**Diethyl 2-((1*H*-benzo[*d*][1,2,3]triazol-1-yl)(3,4-dimethylphenyl)methoxy)malonate (**3f**)**

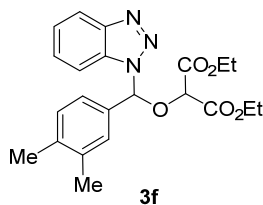

Prepared according to general procedure A using aryl oxiranyl dicarboxylate **2f** (29.2 mg, 0.1 mmol, 1.0 equiv), benzotriazole **1a** (12 mg, 0.1 mmol), Y(OTf)<sub>3</sub> (2.7 mg, 0.005 mmol, 5 mol%), and activated 4Å molecular sieve (30 mg) in DCE (2 mL) at 80 °C for 10 h. Purification by preparative thin layer chromatography using Pet/EtOAc system (Pet/EtOAc, 3/1, v/v) to give product **3f** as a colorless solid (39.9 mg, 97% yield).

**m.p.** : 64.7 - 68.3 °C.

**R<sub>f</sub>** = 0.50 (Pet/EtOAc, 4/1, v/v).

**<sup>1</sup>H NMR** (400 MHz, CDCl<sub>3</sub>) δ 8.07 - 8.04 (m, 1H), 7.35 - 7.26 (m, 5H), 7.17 - 7.10 (m, 2H), 4.67 (s, 1H), 4.36 - 4.27 (m, 2H), 3.91 (q, *J* = 7.2 Hz, 2H), 2.23 (d, *J* = 9.6 Hz, 6H), 1.31 (t, *J* = 7.2 Hz, 3H), 1.00 (t, *J* = 7.2 Hz, 3H).

**<sup>13</sup>C NMR** (100 MHz, CDCl<sub>3</sub>) δ 165.9, 165.0, 147.2, 138.1, 137.2, 132.1, 131.5, 130.0, 127.8, 127.4, 124.6, 123.6, 120.0, 112.3, 89.5, 76.4, 62.6, 62.2, 20.0, 19.7, 14.2, 13.7.

**HRMS** (ESI) *m/z*: [M + Na]<sup>+</sup> Calcd for C<sub>22</sub>H<sub>25</sub>N<sub>3</sub>NaO<sub>5</sub> 434.1686; Found 434.1683.

**IR**(neat): 2990, 1736, 1615, 1494, 1450, 1237, 1085, 803, 742.

**Crude <sup>1</sup>H NMR** Ratio of *N*<sup>1</sup>/*N*<sup>2</sup> > 95:5

**diethyl 2-((1*H*-benzo[*d*][1,2,3]triazol-1-yl)(3,4,5-trimethoxyphenyl)methoxy)malonate (**3g**)**

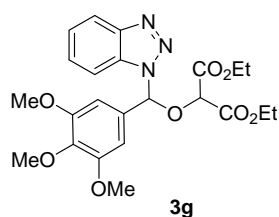

Prepared according to general procedure A using aryl oxiranyl dicarboxylate **2g** (36.0 mg, 0.1 mmol, 1.0 equiv), benzotriazole **1a** (12 mg, 0.1 mmol), Y(OTf)<sub>3</sub> (2.7 mg, 0.005 mmol, 5 mol%), and activated 4Å molecular sieve (30 mg) in DCE (2 mL) at 80 °C for 10 h. Purification by preparative thin layer chromatography using Pet/EtOAc system (Pet/EtOAc, 3/1, v/v) to give product **3g** as a colorless solid (41.0 mg, 86% yield).

**m.p.** : 67.2 - 74.3 °C.

**R<sub>f</sub>** = 0.33 (Pet/EtOAc, 2/1, v/v).

**<sup>1</sup>H NMR** (400 MHz, CDCl<sub>3</sub>) δ 8.08 - 8.05 (m, 1H), 7.37 - 7.31 (m, 4H), 6.71 (s, 2H), 4.68 (s, 1H), 4.36 - 4.27 (m, 2H), 3.94 - 3.91 (m, 2H), 3.84 (s, 3H), 3.76 (s, 6H), 1.31 (t, *J* = 7.2 Hz, 3H), 1.01 (t, *J* = 7.2 Hz, 3H).

**<sup>13</sup>C NMR** (100 MHz, CDCl<sub>3</sub>) δ 165.8, 164.9, 153.6, 147.2, 138.9, 131.5, 130.2, 128.0, 124.7, 120.0, 112.1, 103.7, 89.3, 89.2, 76.5, 62.6, 62.2, 60.9, 56.3, 14.1, 13.7.

**HRMS** (ESI) *m/z*: [M + Na]<sup>+</sup> Calcd for C<sub>23</sub>H<sub>27</sub>N<sub>3</sub>NaO<sub>8</sub> 496.1690; Found 496.1690.

**IR**(neat): 2985, 1746, 1593, 1491, 1452, 1229, 1082, 800, 761.

**Crude <sup>1</sup>H NMR** Ratio of *N*<sup>1</sup>/*N*<sup>2</sup> >95:5

**Diethyl 2-((1*H*-benzo[*d*][1,2,3]triazol-1-yl)(naphthalen-1-yl)methoxy)malonate (**3h**)**

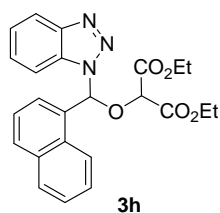

Prepared according to general procedure A using aryl oxiranyl dicarboxylate **2h** (31.4 mg, 0.1 mmol, 1.0 equiv), benzotriazole **1a** (12 mg, 0.1 mmol), Y(OTf)<sub>3</sub> (2.7 mg, 0.005 mmol, 5 mol%), and activated 4Å molecular sieve (30 mg) in DCE (2 mL) at 80 °C for 10 h. Purification by preparative thin layer chromatography using Pet/EtOAc system (Pet/EtOAc, 3/1, v/v) to give product **3h** as a thick colorless oil (39.0 mg, 90% yield).

**R<sub>f</sub>** = 0.53 (Pet/EtOAc, 4/1, v/v).

**<sup>1</sup>H NMR** (600 MHz, CDCl<sub>3</sub>) δ 8.46 (d, *J* = 7.2 Hz, 1H), 8.01 (s, 1H), 7.98 (d, *J* = 8.4 Hz, 1H), 7.94 (d, *J* = 8.4 Hz, 1H), 7.83 - 7.81 (m, 2H), 7.66 (t, *J* = 7.8 Hz, 1H), 7.40 (t, *J* = 7.8 Hz, 1H), 7.34 (t, *J* = 8.4 Hz, 1H), 7.21 (dt, *J* = 7.2, 24.0 Hz, 2H), 7.14 (d, *J* = 8.4 Hz, 1H), 4.88 (s, 1H), 4.36 - 4.29 (m, 2H), 3.95 (q, *J* = 7.2 Hz, 2H), 1.30 (t, *J* = 7.2 Hz, 3H), 1.04 (t, *J* = 7.2 Hz, 3H).

**<sup>13</sup>C NMR** (150 MHz, CDCl<sub>3</sub>) δ 165.8, 165.1, 147.1, 133.8, 131.6, 130.8, 130.1, 129.2, 129.0, 128.0, 127.3, 126.1, 125.2, 125.0, 124.5, 122.3, 120.0, 111.7, 87.1, 76.5, 62.6, 62.2, 14.1, 13.8.

**HRMS** (ESI) *m/z*: [M + Na]<sup>+</sup> Calcd for C<sub>24</sub>H<sub>23</sub>N<sub>3</sub>NaO<sub>5</sub> 456.1530; Found 456.1530.

**IR**(neat): 2982, 1742, 1611, 1492, 1449, 1234, 1111, 818, 796.

**Crude <sup>1</sup>H NMR** Ratio of *N*<sup>1</sup>/*N*<sup>2</sup> = 93:7

**Diethyl 2-((1*H*-benzo[*d*][1,2,3]triazol-1-yl)(naphthalen-2-yl)methoxy)malonate (**3i**)**

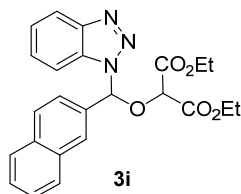

Prepared according to general procedure A using aryl oxiranyl dicarboxylate **2i** (31.4 mg, 0.1 mmol, 1.0 equiv), benzotriazole **1a** (12 mg, 0.1 mmol), Y(OTf)<sub>3</sub> (2.7 mg, 0.005 mmol, 5 mol%), and activated 4Å molecular sieve (30 mg) in DCE (2 mL) at 80 °C for 10 h. Purification by preparative thin layer chromatography using Pet/EtOAc system (Pet/EtOAc, 3/1, v/v) to give product **3i** as a colorless solid (39.0 mg, 90% yield).

**m.p.** : 94.2 - 98.4 °C.

**R<sub>f</sub>** = 0.53 (Pet/EtOAc, 4/1, v/v).

**<sup>1</sup>H NMR** (400 MHz, CDCl<sub>3</sub>) δ 8.14 (s, 1H), 8.08 (d, *J* = 8.0 Hz, 1H), 7.88 - 7.80 (m, 3H), 7.57 (s, 1H), 7.53 - 7.51 (m, 2H), 7.41 - 7.39 (m, 1H), 7.35 - 7.30 (m, 1H), 7.27 - 7.20 (m, 2H), 4.77 (s, 1H), 4.39 - 4.30 (m, 2H), 3.94 (q, *J* = 7.2 Hz, 2H), 1.33 (t, *J* = 7.2 Hz, 3H), 1.03 (t, *J* = 7.2 Hz, 3H).

**<sup>13</sup>C NMR** (100 MHz, CDCl<sub>3</sub>) δ 165.9, 165.0, 147.3, 133.7, 133.0, 132.0, 131.5, 128.9, 128.7, 128.0, 127.8, 127.1, 126.8, 126.0, 124.7, 123.4, 120.1, 112.1, 89.4, 76.5, 62.7, 62.3, 14.2, 13.7.

**HRMS** (ESI) *m/z*: [M + Na]<sup>+</sup> Calcd for C<sub>24</sub>H<sub>23</sub>N<sub>3</sub>NaO<sub>5</sub> 456.1530; Found 456.1530.

**IR**(neat): 2995, 1749, 1605, 1495, 1473, 1234, 1071, 795, 749

**Crude <sup>1</sup>H NMR** Ratio of *N*<sup>1</sup>/*N*<sup>2</sup> = 95:5

**Diethyl 2-((1*H*-benzo[*d*][1,2,3]triazol-1-yl)(2-fluorophenyl)methoxy)malonate (**3j**)**

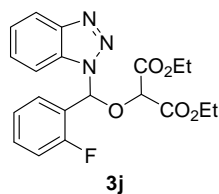

Prepared according to general procedure A using aryl oxiranyl dicarboxylate **2j** (28.2 mg, 0.1 mmol, 1.0 equiv), benzotriazole **1a** (12 mg, 0.1 mmol), Y(OTf)<sub>3</sub> (2.7 mg, 0.005 mmol, 5 mol%), and activated 4Å molecular sieve (30 mg) in DCE (2 mL) at 100 °C for 10 h. Purification by preparative thin layer chromatography using Pet/EtOAc system (Pet/EtOAc, 3/1, v/v) to give product **3j** as a colorless solid (28.1 mg, 70% yield).

**m.p.** : 54.5 - 60.6 °C.

**R<sub>f</sub>** = 0.55 (Pet/EtOAc, 4/1, v/v).

**<sup>1</sup>H NMR** (400 MHz, CDCl<sub>3</sub>) δ 8.18 - 8.14 (m, 1H), 8.07 - 8.04 (m, 1H), 7.58 (s, 1H), 7.43 - 7.39 (m, 1H), 7.36 - 7.32 (m, 3H), 7.28 - 7.24 (m, 1H), 7.02 - 6.97 (m, 1H), 4.77 (s, 1H), 4.36 - 4.27 (m, 2H), 3.99 - 3.94 (m, 2H), 1.30 (t, *J* = 7.2 Hz, 3H), 1.05 (t, *J* = 7.2 Hz, 3H).

**<sup>13</sup>C NMR** (100 MHz, CDCl<sub>3</sub>) δ 165.6, 164.9, 160.0 (d, <sup>1</sup>*J*<sub>C-F</sub> = 249.2 Hz), 146.9, 131.8 (d, <sup>3</sup>*J*<sub>C-F</sub> = 8.3 Hz), 131.5, 128.3 (d, <sup>4</sup>*J*<sub>C-F</sub> = 2.3 Hz), 128.0, 124.5, 124.5, 122.2 (d, <sup>3</sup>*J*<sub>C-F</sub> = 11.3 Hz), 120.2, 116.0 (d, <sup>2</sup>*J*<sub>C-F</sub> = 20.2 Hz), 111.1, 84.4 (d, <sup>4</sup>*J*<sub>C-F</sub> = 2.8 Hz), 76.2, 62.6, 62.3, 14.1, 13.7.

**<sup>19</sup>F NMR** (376 MHz, CDCl<sub>3</sub>): -116.1.

**HRMS** (ESI) *m/z*: [M + Na]<sup>+</sup> Calcd for C<sub>20</sub>H<sub>20</sub>FN<sub>3</sub>NaO<sub>5</sub> 424.1279; Found 424.1279.

**IR**(neat): 2924, 1743, 1617, 1491, 1451, 1380, 1234, 1077, 815, 747.

**Crude <sup>1</sup>H NMR** Ratio of *N*<sup>1</sup>/*N*<sup>2</sup> = 83:17



**Diethyl 2-((1*H*-benzo[*d*][1,2,3]triazol-1-yl)(2-chlorophenyl)methoxy)malonate (**3k**)**

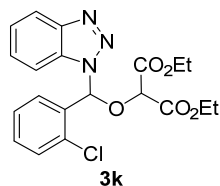

Prepared according to general procedure A using aryl oxiranyl dicarboxylate **2k** (29.8 mg, 0.1 mmol, 1.0 equiv), benzotriazole **1a** (12 mg, 0.1 mmol), Y(OTf)<sub>3</sub> (2.7 mg, 0.005 mmol, 5 mol%), and activated 4Å molecular sieve (30 mg) in DCE (2 mL) at 100 °C for 10 h. Purification by preparative thin layer chromatography using Pet/EtOAc system (Pet/EtOAc, 3/1, v/v) to give product **3k** as a thick colorless oil (25.9 mg, 62% yield).

**R<sub>f</sub>** = 0.50 (Pet/EtOAc, 4/1, v/v).

**<sup>1</sup>H NMR** (400 MHz, CDCl<sub>3</sub>) δ 8.34 - 8.32 (m, 1H), 8.05 - 8.03 (m, 1H), 7.55 (s, 1H), 7.52 - 7.48 (m, 1H), 7.41 - 7.37 (m, 1H), 7.34 - 7.29 (m, 3H), 7.12 - 7.10 (m, 1H), 4.83 (s, 1H), 4.32 - 4.26 (m, 2H), 3.95 (q, *J* = 7.2 Hz, 2H), 1.29 (t, *J* = 7.2 Hz, 3H), 1.04 (t, *J* = 7.2 Hz, 3H).

**<sup>13</sup>C NMR** (100 MHz, CDCl<sub>3</sub>) δ 165.6, 165.0, 146.8, 133.1, 132.0, 131.7, 131.2, 130.3, 128.9, 128.0, 127.2, 124.5, 120.2, 111.0, 85.9, 76.3, 62.7, 62.3, 14.1, 13.8.

**HRMS** (ESI) *m/z*: [M + Na]<sup>+</sup> Calcd for C<sub>20</sub>H<sub>20</sub>ClN<sub>3</sub>NaO<sub>5</sub> 440.0984; Found 440.0983.

**IR**(neat): 2984, 1743, 1614, 1492, 1448, 1238, 1070, 811, 746.

**Crude <sup>1</sup>H NMR** Ratio of *N*<sup>1</sup>/*N*<sup>2</sup> > 95:5

**Diethyl 2-((1*H*-benzo[*d*][1,2,3]triazol-1-yl)(2-bromophenyl)methoxy)malonate (**3I**)**

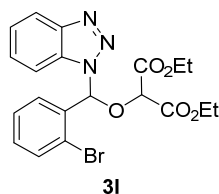

Prepared according to general procedure A using aryl oxiranyl dicarboxylate **2I** (34.2 mg, 0.1 mmol, 1.0 equiv), benzotriazole **1a** (12 mg, 0.1 mmol), Y(OTf)<sub>3</sub> (2.7 mg, 0.005 mmol, 5 mol%), and activated 4Å molecular sieve (30 mg) in DCE (2 mL) at 100 °C for 10 h. Purification by preparative thin layer chromatography using Pet/EtOAc system (Pet/EtOAc, 3/1, v/v) to give product **3I** as a colorless solid (32.7 mg, 71% yield).

**m.p.** : 69.3 - 74.7 °C.

**R<sub>f</sub>** = 0.48 (Pet/EtOAc, 4/1, v/v).

**<sup>1</sup>H NMR** (600 MHz, CDCl<sub>3</sub>) δ 8.35 (d, *J* = 7.8 Hz, 1H), 8.05 (d, *J* = 7.8 Hz, 1H), 7.57 - 7.52 (m, 2H), 7.50 (s, 1H), 7.33 - 7.29 (m, 3H), 7.09 (d, *J* = 7.8 Hz, 1H), 4.86 (s, 1H), 4.35 - 4.26 (m, 2H), 3.96 (q, *J* = 7.2 Hz, 2H), 1.30 (t, *J* = 7.2 Hz, 3H), 1.05 (t, *J* = 7.2 Hz, 3H).

**<sup>13</sup>C NMR** (100 MHz, CDCl<sub>3</sub>) δ 165.6, 165.0, 146.8, 133.7, 133.5, 131.8, 131.4, 129.4, 128.1, 127.8, 124.5, 122.7, 120.3, 111.0, 87.6, 76.3, 62.7, 62.3, 14.1, 13.8.

**HRMS** (ESI) *m/z*: [M + Na]<sup>+</sup> Calcd for C<sub>20</sub>H<sub>20</sub>BrN<sub>3</sub>NaO<sub>5</sub> 484.0479; Found 484.0476.

**IR**(neat): 2985, 1761, 1600, 1490, 1448, 1238, 1068, 854, 747.

**Crude <sup>1</sup>H NMR** Ratio of *N*<sup>1</sup>/*N*<sup>2</sup> > 95:5

**Diethyl 2-((1*H*-benzo[*d*][1,2,3]triazol-1-yl)(3-fluorophenyl)methoxy)malonate (**3m**)**

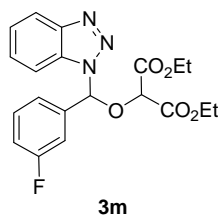

Prepared according to general procedure A using aryl oxiranyl dicarboxylate **2m** (28.2 mg, 0.1 mmol, 1.0 equiv), benzotriazole **1a** (12 mg, 0.1 mmol), Y(OTf)<sub>3</sub> (2.7 mg, 0.005 mmol, 5 mol%), and activated 4Å molecular sieve (30 mg) in DCE (2 mL) at 100 °C for 10 h. Purification by preparative thin layer chromatography using Pet/EtOAc system (Pet/EtOAc, 3/1, v/v) to give product **3m** as a thick colorless oil (30.1 mg, 75% yield).

**R<sub>f</sub>** = 0.53 (Pet/EtOAc, 4/1, v/v).

**<sup>1</sup>H NMR** (400 MHz, CDCl<sub>3</sub>) δ 8.08 - 8.06 (m, 1H), 7.38 (s, 1H), 7.36 - 7.29 (m, 4H), 7.23 - 7.21 (m, 1H), 7.15 - 7.12 (m, 1H), 7.10 - 7.05 (m, 1H), 4.66 (s, 1H), 4.34 - 4.27 (m, 2H), 3.93 (q, *J* = 7.2 Hz, 2H), 1.30 (t, *J* = 7.2 Hz, 3H), 1.15 (t, *J* = 7.2 Hz, 3H).

**<sup>13</sup>C NMR** (100 MHz, CDCl<sub>3</sub>) δ 165.7, 164.7, 163.0 (d, <sup>1</sup>*J*<sub>C-F</sub> = 245.6 Hz), 147.2, 137.3 (d, <sup>3</sup>*J*<sub>C-F</sub> = 7.8 Hz), 131.3, 130.5 (d, <sup>3</sup>*J*<sub>C-F</sub> = 7.9 Hz), 128.2, 124.8, 122.0 (d, <sup>4</sup>*J*<sub>C-F</sub> = 3.0 Hz), 120.2, 116.6 (d, <sup>2</sup>*J*<sub>C-F</sub> = 21.0 Hz), 113.8 (d, <sup>2</sup>*J*<sub>C-F</sub> = 23.6 Hz), 111.9, 88.4 (d, <sup>4</sup>*J*<sub>C-F</sub> = 2.5 Hz), 76.3, 62.7, 62.3, 14.1, 13.7.

**<sup>19</sup>F NMR** (376 MHz, CDCl<sub>3</sub>): -111.5.

**HRMS** (ESI) *m/z*: [M + Na]<sup>+</sup> Calcd for C<sub>20</sub>H<sub>20</sub>FN<sub>3</sub>NaO<sub>5</sub> 424.1279; Found 424.1280.

**IR**(neat): 2984, 1743, 1615, 1490, 1447, 1236, 1074, 859, 747.

**Crude <sup>1</sup>H NMR** Ratio of *N*<sup>1</sup>/*N*<sup>2</sup> > 95:5

**Diethyl 2-((1*H*-benzo[*d*][1,2,3]triazol-1-yl)(3-chlorophenyl)methoxy)malonate (**3n**)**

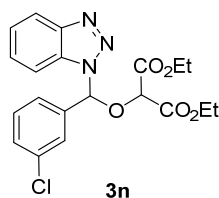

Prepared according to general procedure A using aryl oxiranyl dicarboxylate **2n** (29.8 mg, 0.1 mmol, 1.0 equiv), benzotriazole **1a** (12 mg, 0.1 mmol), Y(OTf)<sub>3</sub> (2.7 mg, 0.005 mmol, 5 mol%), and activated 4Å molecular sieve (30 mg) in DCE (2 mL) at 100 °C for 10 h. Purification by preparative thin layer chromatography using Pet/EtOAc system (Pet/EtOAc, 3/1, v/v) to give product **3n** as a thick colorless oil (30.9 mg, 74% yield).

**R<sub>f</sub>** = 0.50 (Pet/EtOAc, 4/1, v/v).

**<sup>1</sup>H NMR** (400 MHz, CDCl<sub>3</sub>) δ 8.04 - 8.02 (m, 1H), 7.55 (s, 1H), 7.33 - 7.29 (m, 4H), 7.24 - 7.17 (m, 3H), 4.61 (s, 1H), 4.32 - 4.23 (m, 2H), 3.92 - 3.86 (m, 2H), 1.26 (t, *J* = 7.2 Hz, 3H), 0.97 (t, *J* = 7.2 Hz, 3H).

**<sup>13</sup>C NMR** (100 MHz, CDCl<sub>3</sub>) δ 165.7, 164.7, 147.2, 136.8, 135.0, 131.2, 130.2, 129.8, 128.2, 126.7, 124.8, 124.5, 120.2, 111.9, 88.4, 76.3, 62.7, 62.3, 14.1, 13.7.

**HRMS** (ESI) *m/z*: [M + Na]<sup>+</sup> Calcd for C<sub>20</sub>H<sub>20</sub>ClN<sub>3</sub>NaO<sub>5</sub> 440.0984; Found 440.0985.

**IR**(neat): 2983, 1743, 1616, 1492, 1450, 1236, 1076, 859, 748.

**Crude <sup>1</sup>H NMR** Ratio of *N*<sup>1</sup>/*N*<sup>2</sup> > 95:5

**Diethyl 2-((1*H*-benzo[*d*][1,2,3]triazol-1-yl)(3-bromophenyl)methoxy)malonate (**3o**)**

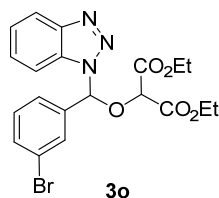

Prepared according to general procedure A using aryl oxiranyl dicarboxylate **2o** (34.2 mg, 0.1 mmol, 1.0 equiv), benzotriazole **1a** (12 mg, 0.1 mmol), Y(OTf)<sub>3</sub> (2.7 mg, 0.005 mmol, 5 mol%), and activated 4Å molecular sieve (30 mg) in DCE (2 mL) at 100 °C for 10 h. Purification by preparative thin layer chromatography using Pet/EtOAc system (Pet/EtOAc, 3/1, v/v) to give product **3o** as a thick colorless oil (35.0 mg, 76% yield).

**R<sub>f</sub>** = 0.55 (Pet/EtOAc, 3/1, v/v).

**<sup>1</sup>H NMR** (400 MHz, CDCl<sub>3</sub>) δ 8.09 - 8.07 (m, 1H), 7.76 (s, 1H), 7.53 - 7.50 (m, 1H), 7.37 - 7.34 (m, 3H), 7.29 - 7.20 (m, 3H), 4.65 (s, 1H), 4.37 - 4.28 (m, 2H), 3.97 - 3.91 (m, 2H), 1.31 (t, *J* = 7.2 Hz, 3H), 1.02 (t, *J* = 7.2 Hz, 3H).

**<sup>13</sup>C NMR** (100 MHz, CDCl<sub>3</sub>) δ 165.7, 164.7, 147.3, 137.0, 132.8, 131.2, 130.4, 129.5, 128.2, 125.0, 124.8, 123.1, 120.3, 111.9, 88.3, 76.3, 62.8, 62.3, 14.2, 13.8.

**HRMS** (ESI) *m/z*: [M + Na]<sup>+</sup> Calcd for C<sub>20</sub>H<sub>20</sub>BrN<sub>3</sub>NaO<sub>5</sub> 484.0479; Found 484.0479.

**IR**(neat): 2984, 1743, 1613, 1492, 1450, 1236, 1076, 859, 748.

**Crude <sup>1</sup>H NMR** Ratio of *N*<sup>1</sup>/*N*<sup>2</sup> > 95:5

**Diethyl 2-((1*H*-benzo[*d*][1,2,3]triazol-1-yl)(4-fluorophenyl)methoxy)malonate (**3p**)**

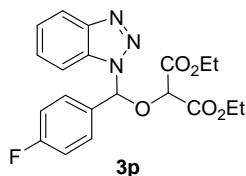

Prepared according to general procedure A using aryl oxiranyl dicarboxylate **2p** (28.2 mg, 0.1 mmol, 1.0 equiv), benzotriazole **1a** (12 mg, 0.1 mmol), Y(OTf)<sub>3</sub> (2.7 mg, 0.005 mmol, 5 mol%), and activated 4Å molecular sieve (30 mg) in DCE (2 mL) at 80 °C for 10 h. Purification by preparative thin layer chromatography using Pet/EtOAc system (Pet/EtOAc, 3/1, v/v) to give product **3p** as a thick colorless oil (34.5 mg, 86% yield).

**R<sub>f</sub>** = 0.51 (Pet/EtOAc, 4/1, v/v).

**<sup>1</sup>H NMR** (600 MHz, CDCl<sub>3</sub>) δ 8.08 (d, *J* = 7.2 Hz, 1H), 7.47 - 7.45 (m, 2H), 7.38 (s, 1H), 7.36 - 7.32 (m, 2H), 7.20 (d, *J* = 7.8 Hz, 1H), 7.07 (t, *J* = 8.4 Hz, 2H), 4.67 (s, 1H), 4.37 - 4.27 (m, 2H), 3.95 - 3.91 (m, 2H), 1.31 (t, *J* = 7.2 Hz, 3H), 1.02 (t, *J* = 7.2 Hz, 3H).

**<sup>13</sup>C NMR** (150 MHz, CDCl<sub>3</sub>) δ 165.8, 163.4, (d, <sup>1</sup>*J*<sub>C-F</sub> = 247.2 Hz), 162.6, 147.3, 131.3, 130.7, (d, <sup>3</sup>*J*<sub>C-F</sub> = 3.5 Hz), 128.4, (d, <sup>2</sup>*J*<sub>C-F</sub> = 8.0 Hz), 128.1, 124.8, 120.2, 116.0, 115.8, 112.0, 88.8, 76.3, 62.7, 62.3, 14.2, 13.8.

**<sup>19</sup>F NMR** (376 MHz, CDCl<sub>3</sub>): -111.8.

**HRMS** (ESI) *m/z*: [M + Na]<sup>+</sup> Calcd for C<sub>20</sub>H<sub>20</sub>FN<sub>3</sub>NaO<sub>5</sub> 424.1279; Found 424.1279.

**IR**(neat): 2983, 1743, 1614, 1492, 1450, 1236, 1073, 859, 748.

**Crude <sup>1</sup>H NMR** Ratio of *N*<sup>1</sup>/*N*<sup>2</sup> = 94:6

**Diethyl 2-((1*H*-benzo[*d*][1,2,3]triazol-1-yl)(4-chlorophenyl)methoxy)malonate (**3q**)**

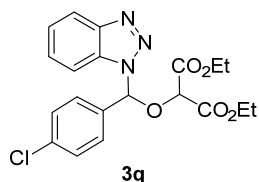

Prepared according to general procedure A using aryl oxiranyl dicarboxylate **2q** (29.8 mg, 0.1 mmol, 1.0 equiv), benzotriazole **1a** (12 mg, 0.1 mmol), Y(OTf)<sub>3</sub> (2.7 mg, 0.005 mmol, 5 mol%), and activated 4Å molecular sieve (30 mg) in DCE (2 mL) at 80 °C for 10 h. Purification by preparative thin layer chromatography using Pet/EtOAc system (Pet/EtOAc, 3/1, v/v) to give product **3q** as a thick colorless oil (33.8 mg, 81% yield).

**R<sub>f</sub>** = 0.56 (Pet/EtOAc, 3/1, v/v).

**<sup>1</sup>H NMR** (400 MHz, CDCl<sub>3</sub>) δ 8.09 - 8.07 (m, 1H), 7.42 - 7.33 (m, 7H), 7.21 - 7.19 (m, 1H), 4.67 (s, 1H), 4.37 - 4.27 (m, 2H), 3.96 - 3.91 (m, 2H), 1.31 (t, *J* = 7.2 Hz, 3H), 1.02 (t, *J* = 7.2 Hz, 3H).

**<sup>13</sup>C NMR** (100 MHz, CDCl<sub>3</sub>) δ 165.8, 164.7, 147.3, 135.7, 133.4, 131.3, 129.1, 128.2, 127.8, 124.8, 120.2, 111.9, 88.7, 76.3, 62.7, 62.3, 14.2, 13.8.

**HRMS** (ESI) *m/z*: [M + Na]<sup>+</sup> Calcd for C<sub>20</sub>H<sub>20</sub>ClN<sub>3</sub>NaO<sub>5</sub> 440.0984; Found 440.0987.

**IR**(neat): 2985, 1743, 1616, 1493, 1450, 1236, 1090 859, 747.

**Crude <sup>1</sup>H NMR** Ratio of *N*<sup>1</sup>/*N*<sup>2</sup> = 93:7

**Diethyl 2-((1*H*-benzo[*d*][1,2,3]triazol-1-yl)(4-bromophenyl)methoxy)malonate (**3r**)**

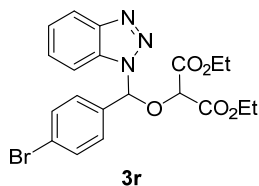

Prepared according to general procedure A using aryl oxiranyl dicarboxylate **2r** (34.2 mg, 0.1 mmol, 1.0 equiv), benzotriazole **1a** (12 mg, 0.1 mmol), Y(OTf)<sub>3</sub> (2.7 mg, 0.005 mmol, 5 mol%), and activated 4Å molecular sieve (30 mg) in DCE (2 mL) at 80 °C for 10 h. Purification by preparative thin layer chromatography using Pet/EtOAc system (Pet/EtOAc, 3/1, v/v) to give product **3r** as a thick colorless oil (36.9 mg, 80% yield).

**R<sub>f</sub>** = 0.52 (Pet/EtOAc, 3/1, v/v).

**<sup>1</sup>H NMR** (400 MHz, CDCl<sub>3</sub>) δ 8.09 - 8.06 (m, 1H), 7.53 - 7.50 (m, 2H), 7.37 - 7.32 (m, 5H), 7.21 - 7.19 (m, 1H), 4.66 (s, 1H), 4.35 - 4.28 (m, 2H), 3.96 - 3.90 (m, 2H), 1.31 (t, *J* = 7.2 Hz, 3H), 1.02 (t, *J* = 7.2 Hz, 3H).

**<sup>13</sup>C NMR** (100 MHz, CDCl<sub>3</sub>) δ 165.8, 164.7, 147.3, 133.9, 132.1, 131.3, 128.2, 128.1, 124.8, 123.9, 120.3, 111.9, 88.7, 76.3, 62.8, 62.3, 14.2, 13.8.

**HRMS** (ESI) *m/z*: [M + Na]<sup>+</sup> Calcd for C<sub>20</sub>H<sub>20</sub>BrN<sub>3</sub>NaO<sub>5</sub> 484.0479; Found 484.0474.

**IR**(neat): 2984, 1743, 1616, 1493, 1450, 1236, 1090, 859, 747.

**Crude <sup>1</sup>H NMR** Ratio of *N*<sup>1</sup>/*N*<sup>2</sup> > 95:5



**Diethyl 2-((1*H*-benzo[*d*][1,2,3]triazol-1-yl)(4-iodophenyl)methoxy)malonate (3s)**

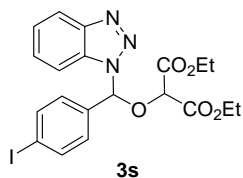

Prepared according to general procedure A using aryl oxiranyl dicarboxylate **2s** (39.0 mg, 0.1 mmol, 1.0 equiv), benzotriazole **1a** (12 mg, 0.1 mmol), Y(OTf)<sub>3</sub> (2.7 mg, 0.005 mmol, 5 mol%), and activated 4Å molecular sieve (30 mg) in DCE (2 mL) at 80 °C for 10 h. Purification by preparative thin layer chromatography using Pet/EtOAc system (Pet/EtOAc, 3/1, v/v) to give product **3s** as a thick colorless oil (40.7 mg, 80% yield).

**R<sub>f</sub>** = 0.49 (Pet/EtOAc, 3/1, v/v).

**<sup>1</sup>H NMR** (400 MHz, CDCl<sub>3</sub>) δ 8.08 - 8.06 (m, 1H), 7.71 (d, *J* = 8.8 Hz, 2H), 7.38 - 7.32 (m, 3H), 7.20 (d, *J* = 8.4 Hz, 3H), 4.66 (s, 1H), 4.36 - 4.27 (m, 2H), 3.96 - 3.90 (m, 2H), 1.30 (t, *J* = 7.2 Hz, 3H), 1.01 (t, *J* = 7.2 Hz, 3H).

**<sup>13</sup>C NMR** (100 MHz, CDCl<sub>3</sub>) δ 165.8, 164.7, 147.3, 138.0, 134.6, 131.3, 128.2, 128.2, 124.8, 120.2, 111.9, 95.8, 88.8, 76.3, 62.7, 62.3, 14.2, 13.8.

**HRMS** (ESI) *m/z*: [M + Na]<sup>+</sup> Calcd for C<sub>20</sub>H<sub>20</sub>IN<sub>3</sub>NaO<sub>5</sub> 532.0340; Found 532.0340.

**IR**(neat): 2983, 1743, 1614, 1490, 1450, 1235, 1108, 860, 747.

**Crude <sup>1</sup>H NMR** Ratio of *N*<sup>1</sup>/*N*<sup>2</sup> > 95:5

**Diethyl 2-((1*H*-benzo[*d*][1,2,3]triazol-1-yl)(3,4-dichlorophenyl)methoxy)malonate (**3t**)**

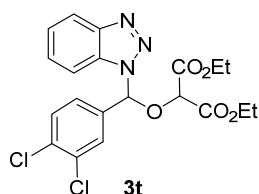

Prepared according to general procedure A using aryl oxiranyl dicarboxylate **2t** (33.2 mg, 0.1 mmol, 1.0 equiv), benzotriazole **1a** (12 mg, 0.1 mmol), Y(OTf)<sub>3</sub> (2.7 mg, 0.005 mmol, 5 mol%), and activated 4Å molecular sieve (30 mg) in DCE (2 mL) at 80 °C for 10 h. Purification by preparative thin layer chromatography using Pet/EtOAc system (Pet/EtOAc, 3/1, v/v) to give product **3t** as a colorless solid (34.3 mg, 76% yield).

**m.p.** : 63.1 - 69.4 °C.

**R<sub>f</sub>** = 0.51 (Pet/EtOAc, 4/1, v/v).

**<sup>1</sup>H NMR** (400 MHz, CDCl<sub>3</sub>) δ 8.10 - 8.07 (m, 1H), 7.69 - 7.68 (m, 1H), 7.43 (d, *J* = 8.4 Hz, 1H), 7.38 - 7.34 (m, 3H), 7.24 - 7.17 (m, 2H), 4.64 (s, 1H), 4.37 - 4.27 (m, 2H), 3.97 - 3.92 (m, 2H), 1.31 (t, *J* = 7.2 Hz, 3H), 1.03 (t, *J* = 7.2 Hz, 3H).

**<sup>13</sup>C NMR** (100 MHz, CDCl<sub>3</sub>) δ 165.6, 164.5, 147.3, 135.0, 134.0, 133.4, 131.1, 130.9, 128.6, 128.4, 125.7, 124.9, 120.3, 111.7, 87.9, 76.2, 62.8, 62.4, 14.1, 13.7.

**HRMS** (ESI) *m/z*: [M + Na]<sup>+</sup> Calcd for C<sub>20</sub>H<sub>19</sub>Cl<sub>2</sub>N<sub>3</sub>NaO<sub>5</sub> 474.0594; Found 474.0596.

**IR**(neat): 2987, 1743, 1616, 1485, 1450, 1236, 1109, 829, 748.

**Crude <sup>1</sup>H NMR** Ratio of *N*<sup>1</sup>/*N*<sup>2</sup> >95:5

**Dimethyl 2-((1*H*-benzo[*d*][1,2,3]triazol-1-yl)(phenyl)methoxy)malonate (**3u**)**

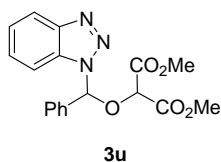

Prepared according to general procedure A using phenyl oxiranyl dicarboxylate **2u** (23.6 mg, 0.1 mmol, 1.0 equiv), benzotriazole **1a** (12 mg, 0.1 mmol), Y(OTf)<sub>3</sub> (2.7 mg, 0.005 mmol, 5 mol%), and activated 4Å molecular sieve (30 mg) in DCE (2 mL) at 80 °C for 10 h. Purification by preparative thin layer chromatography using Pet/EtOAc system (Pet/EtOAc, 3/1, v/v) to give product **3u** as a thick colorless oil (24.9 mg, 70% yield).

**R<sub>f</sub>** = 0.50 (Pet/EtOAc, 4/1, v/v).

**<sup>1</sup>H NMR** (400 MHz, CDCl<sub>3</sub>) δ 8.08 - 8.06 (m, 1H), 7.49 - 7.47 (m, 2H), 7.41 - 7.36 (m, 4H), 7.35 - 7.30 (m, 2H), 7.20 - 7.17 (m, 1H), 4.74 (s, 1H), 3.87 (s, 3H), 4.46 (s, 3H).

**<sup>13</sup>C NMR** (100 MHz, CDCl<sub>3</sub>) δ 166.2, 165.3, 147.2, 134.6, 131.4, 129.7, 128.9, 128.0, 126.3, 124.7, 120.1, 112.1, 89.2, 76.2, 53.4, 53.0.

**HRMS** (ESI) *m/z*: [M + Na]<sup>+</sup> Calcd for C<sub>18</sub>H<sub>17</sub>N<sub>3</sub>NaO<sub>5</sub> 378.1060; Found 378.1060.

**IR**(neat): 2953, 1745, 1622, 1465, 1450, 1235, 1110, 859, 746.

**Crude <sup>1</sup>H NMR** Ratio of *N*<sup>1</sup>/*N*<sup>2</sup> > 95:5

**2-((1*H*-benzo[*d*][1,2,3]triazol-1-yl)(phenyl)methoxy)-1,3-diphenylpropane-1,3-dione (3v)**

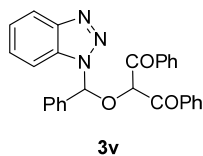

Prepared according to general procedure A using phenyl oxiranyl diketone **2v** (33.0 mg, 0.1 mmol, 1.0 equiv), benzotriazole **1a** (12 mg, 0.1 mmol), Y(OTf)<sub>3</sub> (2.7 mg, 0.005 mmol, 5 mol%), and activated 4Å molecular sieve (30 mg) in DCE (2 mL) at 80 °C for 10 h. Purification by recrystallization at 0 °C using Pet/Et<sub>2</sub>O system to give product **3v** as a yellow solid (38.9 mg, 87% yield).

**m.p.** : 138.7 - 147.9 °C.

**R<sub>f</sub>** = 0.47 (Pet/EtOAc, 10/1, v/v).

**<sup>1</sup>H NMR** (400 MHz, CDCl<sub>3</sub>) δ 8.06 - 8.00 (m, 3H), 7.64 (d, *J* = 7.2 Hz, 2H), 7.59 - 7.55 (m, 1H), 7.53 - 7.48 (m, 2H), 7.46 - 7.35 (m, 7H), 7.30 (t, *J* = 7.6 Hz, 1H), 7.21 - 7.14 (m, 3H), 6.90 (d, *J* = 8.4 Hz, 1H), 6.01 (s, 1H).

**<sup>13</sup>C NMR** (100 MHz, CDCl<sub>3</sub>) δ 193.0, 191.7, 134.8, 134.6, 134.4, 134.1, 134.0, 131.5, 129.6, 129.4, 129.0, 128.9, 128.6, 128.0, 126.4, 124.6, 120.2, 111.9, 89.0, 84.8.

**HRMS** (ESI) *m/z*: [M + Na]<sup>+</sup> Calcd for C<sub>28</sub>H<sub>21</sub>N<sub>3</sub>NaO<sub>3</sub> 470.1475; Found 470.1475.

**IR(neat)**: 2955, 1746, 1614, 1495, 1451, 1237, 1110, 858, 731.

**Crude <sup>1</sup>H NMR** Ratio of *N*<sup>1</sup>/*N*<sup>2</sup> > 95:5

**Diethyl 2-((5,6-dimethyl-1H-benzo[d][1,2,3]triazol-1-yl)(phenyl)methoxy)malonate (3w)**

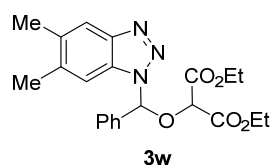

Prepared according to general procedure A using phenyl oxiranyl dicarboxylate **2a** (26.4 mg, 0.1 mmol, 1.0 equiv), benzotriazole **1b** (14.7 mg, 0.1 mmol), Y(OTf)<sub>3</sub> (2.7 mg, 0.005 mmol, 5 mol%), and activated 4Å molecular sieve (30 mg) in DCE (2 mL) at 80 °C for 10 h. Purification by preparative thin layer chromatography using Pet/EtOAc system (Pet/EtOAc, 3/1, v/v) to give product **3w** as a colorless solid (37.4 mg, 91% yield).

**m.p.** : 67.9 - 76.0 °C.

**R<sub>f</sub>** = 0.50 (Pet/EtOAc, 3/1, v/v).

**<sup>1</sup>H NMR** (600 MHz, CDCl<sub>3</sub>) δ 7.78 (s, 1H), 7.46 - 7.44 (m, 2H), 7.36 (t, *J* = 3.6 Hz, 3H), 7.34 (s, 1H), 6.95 (s, 1H), 4.67 (s, 1H), 4.33 - 4.29 (m, 2H), 3.94 (q, *J* = 7.2 Hz, 2H), 2.33 (s, 3H), 2.23 (s, 3H), 1.30 (t, *J* = 7.2 Hz, 3H), 1.03 (t, *J* = 7.2 Hz, 3H).

**<sup>13</sup>C NMR** (150 MHz, CDCl<sub>3</sub>) δ 165.9, 164.9, 146.4, 138.3, 134.9, 134.4, 130.4, 129.4, 128.7, 126.3, 119.1, 111.3, 89.1, 76.3, 62.5, 62.2, 20.9, 20.5, 14.1, 13.7.

**HRMS** (ESI) *m/z*: [M + Na]<sup>+</sup> Calcd for C<sub>22</sub>H<sub>25</sub>N<sub>3</sub>NaO<sub>5</sub> 434.1686; Found 434.1678.

**IR**(neat): 2954, 1749, 1629, 1499, 1453, 1237, 1090, 871, 725.

**Crude <sup>1</sup>H NMR** Ratio of *N*<sup>1</sup>/*N*<sup>2</sup> = 95:5

**Diethyl 2-((5,6-difluoro-1*H*-benzo[*d*][1,2,3]triazol-1-yl)(phenyl)methoxy)malonate (**3x**)**

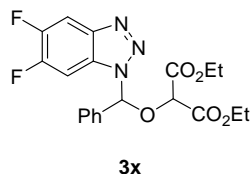

Prepared according to general procedure A using phenyl oxiranyl dicarboxylate **2a** (26.4 mg, 0.1 mmol, 1.0 equiv), benzotriazole **1c** (15.5 mg, 0.1 mmol), Y(OTf)<sub>3</sub> (2.7 mg, 0.005 mmol, 5 mol%), and activated 4Å molecular sieve (30 mg) in DCE (2 mL) at 80 °C for 10 h. Purification by preparative thin layer chromatography using Pet/EtOAc system (Pet/EtOAc, 3/1, v/v) to give product **3x** as a white solid (35.6 mg, 85% yield).

**m.p.** : 60.1 - 71.3 °C.

**R<sub>f</sub>** = 0.55 (Pet/EtOAc, 4/1, v/v).

**<sup>1</sup>H NMR** (600 MHz, CDCl<sub>3</sub>) δ 7.82 - 7.80 (m, 1H), 7.45 - 7.39 (m, 5H), 7.36 (s, 1H), 7.01 - 6.98 (m, 1H), 4.70 (s, 1H), 4.36 - 4.29 (m, 2H), 4.03 - 3.99 (m, 2H), 1.31 (t, *J* = 7.2 Hz, 3H), 1.10 (t, *J* = 7.2 Hz, 3H).

**<sup>13</sup>C NMR** (150 MHz, CDCl<sub>3</sub>) δ 165.6, 164.8, 151.4 (dd, *J*<sub>C-F</sub> = 16.5, 312.9 Hz), 149.7 (dd, *J*<sub>C-F</sub> = 17.0, 309.3 Hz), 142.3 (d, *J*<sub>C-F</sub> = 9.6 Hz), 134.1, 130.0, 129.1, 127.3 (d, *J*<sub>C-F</sub> = 11.9 Hz), 126.2, 106.5 (d, *J*<sub>C-F</sub> = 20.0 Hz), 99.6 (d, *J*<sub>C-F</sub> = 23.9 Hz), 89.5, 76.6, 62.8, 62.4, 14.1, 13.8.

**<sup>19</sup>F NMR** (565 MHz, CDCl<sub>3</sub>): -130.8, -130.9, -137.0, -137.0.

**HRMS** (ESI) *m/z*: [M + Na]<sup>+</sup> Calcd for C<sub>20</sub>H<sub>19</sub>F<sub>2</sub>N<sub>3</sub>NaO<sub>5</sub> 442.1185; Found 442.1186.

**IR**(neat): 2985, 1765, 1603, 1497, 1455, 1240, 1097, 853, 721.

**Crude <sup>1</sup>H NMR** Ratio of *N*<sup>1</sup>/*N*<sup>2</sup> > 95:5

**Diethyl 2-((6-chloro-9H-purin-9-yl)(phenyl)methoxy)malonate (7a)**

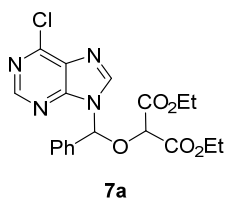

Prepared according to general procedure A using phenyl oxiranyl dicarboxylate **2a** (26.4 mg, 0.1 mmol, 1.0 equiv), purine **6a** (15.4 mg, 0.1 mmol), Y(OTf)<sub>3</sub> (2.7 mg, 0.005 mmol, 5 mol%), and activated 4Å molecular sieve (30 mg) in DCE (2 mL) at 80 °C for 10 h. Purification by preparative thin layer chromatography using Pet/EtOAc system (Pet/EtOAc, 3/1, v/v) to give product **7a** as a colorless solid (27.2 mg, 65% yield).

**m.p.** : 77.3 - 86.7 °C.

**R<sub>f</sub>** = 0.55 (Pet/EtOAc, 2/1, v/v).

**<sup>1</sup>H NMR** (400 MHz, CDCl<sub>3</sub>) δ 8.79 (s, 1H), 8.12 (s, 1H), 7.52 - 7.50 (m, 2H), 7.42 (t, *J* = 3.2Hz, 3H), 7.18 (s, 1H), 4.81 (s, 1H), 4.34 - 4.25(m, 2H), 4.10 - 4.01 (m, 2H), 1.29 (t, *J* = 7.2Hz, 3H), 1.13 (t, *J* = 7.2Hz, 3H).

**<sup>13</sup>C NMR** (100 MHz, CDCl<sub>3</sub>) δ 165.4, 165.0, 152.6, 152.3, 151.6, 144.0, 135.2, 131.4, 130.1, 129.2, 126.3, 84.1, 77.5, 62.7, 62.6, 14.1, 13.9.

**HRMS** (ESI) *m/z*: [M + Na]<sup>+</sup> Calcd for C<sub>19</sub>H<sub>19</sub>ClN<sub>4</sub>NaO<sub>5</sub> 441.0936; Found 441.0927.

**IR(neat)**: 2985, 1744, 1601, 1585, 1491, 1453, 1231, 1100, 856, 735.

**Diethyl 2-((6-bromo-9H-purin-9-yl)(phenyl)methoxy)malonate (7b)**

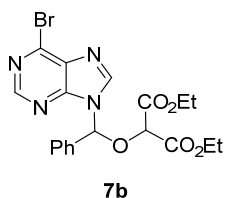

Prepared according to general procedure A using phenyl oxiranyl dicarboxylate **2a** (26.4 mg, 0.1 mmol, 1.0 equiv), purine **6b** (19.7 mg, 0.1 mmol), Y(OTf)<sub>3</sub> (2.7 mg, 0.005 mmol, 5 mol%), and activated 4Å molecular sieve (30 mg) in DCE (2 mL) at 80 °C for 10 h. Purification by preparative thin layer chromatography using Pet/EtOAc system (Pet/EtOAc, 3/1, v/v) to give product **7b** as a thick colorless oil (31.0 mg, 67% yield).

**R<sub>f</sub>** = 0.53 (Pet/EtOAc, 2/1, v/v).

**<sup>1</sup>H NMR** (400 MHz, CDCl<sub>3</sub>) δ 8.74 (s, 1H), 8.13 (s, 1H), 7.51 - 7.49 (m, 2H), 7.43 (t, *J* = 3.2 Hz, 3H), 7.17 (s, 1H), 4.80 (s, 1H), 4.32 - 4.28 (m, 2H), 4.10 - 4.02 (m, 2H), 1.29 (t, *J* = 7.2 Hz, 3H), 1.13 (t, *J* = 7.2 Hz, 3H).

**<sup>13</sup>C NMR** (100 MHz, CDCl<sub>3</sub>) δ 165.4, 165.0, 152.6, 151.0, 143.9, 143.6, 135.2, 134.0, 130.1, 129.2, 126.3, 84.1, 77.5, 62.7, 62.6, 14.1, 13.9.

**HRMS** (ESI) *m/z*: [M + Na]<sup>+</sup> Calcd for C<sub>19</sub>H<sub>19</sub>BrN<sub>4</sub>NaO<sub>5</sub> 485.0431; Found 485.0429.

**IR**(neat): 2983, 1742, 1585, 1557, 1453, 1432, 1231, 1107, 857, 735.



**Diethyl 2-((6-((tert-butoxycarbonyl)amino)-9H-purin-9-yl)(phenyl)methoxy)malonate (7c)**

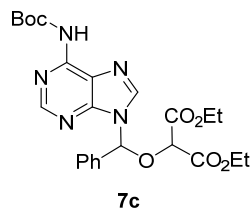

Prepared according to general procedure A using phenyl oxiranyl dicarboxylate **2a** (26.4 mg, 0.1 mmol, 1.0 equiv), *N,N*-Ditert-butoxycarbonyl-9H-purin-6-amine **6c** (33.5 mg, 0.1 mmol), Y(OTf)<sub>3</sub> (2.7 mg, 0.005 mmol, 5 mol%), and activated 4Å molecular sieve (30 mg) in DCE (2 mL) at 80 °C for 10 h. Purification by preparative thin layer chromatography using Pet/EtOAc system (Pet/EtOAc, 2/1, v/v) to give product **7c** as a thick colorless oil (22.5 mg, 45% yield).

**R<sub>f</sub>** = 0.25 (Pet/EtOAc, 1/1, v/v).

**<sup>1</sup>H NMR** (600 MHz, CDCl<sub>3</sub>) δ 8.78 (s, 1H), 8.20 (s, 1H), 7.92 (s, 1H), 7.51 - 7.50 (m, 2H), 7.42 - 7.41 (m, 3H), 7.15 (s, 1H), 4.84 (s, 1H), 4.31 - 4.28(m, 2H), 4.08 - 4.00 (m, 2H), 1.55 (s, 9H), 1.29 (t, *J* = 7.2 Hz, 3H), 1.13 (t, *J* = 7.2 Hz, 3H).

**<sup>13</sup>C NMR** (150 MHz, CDCl<sub>3</sub>) δ 165.6, 165.2, 153.6, 151.8, 150.2, 149.8, 141.3, 135.6, 129.9, 129.1, 126.4, 121.2, 83.5, 82.5, 77.5, 62.6, 62.5, 28.3, 14.1, 13.9.

**HRMS** (ESI) *m/z*: [M + H]<sup>+</sup> Calcd for C<sub>24</sub>H<sub>30</sub>N<sub>5</sub>O<sub>7</sub> 500.2140; Found 500.2140.

**IR**(neat): 3357, 2923, 1744, 1658, 1609, 1453, 1227, 1104, 862, 737.

**Diethyl 2-((6-chloro-2-fluoro-9H-purin-9-yl)(phenyl)methoxy)malonate (7d)**

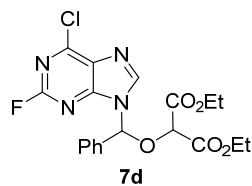

Prepared according to general procedure A using phenyl oxiranyl dicarboxylate **2a** (26.4 mg, 0.1 mmol, 1.0 equiv), purine **6d** (17.2 mg, 0.1 mmol), Y(OTf)<sub>3</sub> (2.7 mg, 0.005 mmol, 5 mol%), and activated 4Å molecular sieve (30 mg) in DCE (2 mL) at 80 °C for 10 h. Purification by preparative thin layer chromatography using Pet/EtOAc system (Pet/EtOAc, 3/1, v/v) to give product **7d** as a thick colorless oil (33.6 mg, 77% yield).

**R<sub>f</sub>** = 0.53 (Pet/EtOAc, 2/1, v/v).

**<sup>1</sup>H NMR** (400 MHz, CDCl<sub>3</sub>) δ 8.09 (s, 1H), 7.51 - 7.49 (m, 2H), 7.45 - 7.42 (m, 3H), 7.04 (s, 1H), 4.76 (s, 1H), 4.31 - 4.28 (m, 2H), 4.12 - 4.09 (m, 2H), 1.29 (t, *J* = 7.2 Hz, 3H), 1.17 (t, *J* = 7.2 Hz, 3H).

**<sup>13</sup>C NMR** (100 MHz, CDCl<sub>3</sub>) δ 165.2, 165.0, 157.6 (d, <sup>1</sup>*J*<sub>C-F</sub> = 220.3 Hz), 154.0 (d, <sup>2</sup>*J*<sub>C-F</sub> = 16.7 Hz), 153.3 (d, <sup>2</sup>*J*<sub>C-F</sub> = 17.3 Hz), 144.5 (d, <sup>3</sup>*J*<sub>C-F</sub> = 3.0 Hz), 134.8, 130.3, 130.1 (d, <sup>3</sup>*J*<sub>C-F</sub> = 5.0 Hz), 129.3, 126.3, 84.3, 77.5, 62.8, 62.7, 14.1, 13.9.

**<sup>19</sup>F NMR** (376 MHz, CDCl<sub>3</sub>): -48.7.

**HRMS** (ESI) *m/z*: [M + Na]<sup>+</sup> Calcd for C<sub>19</sub>H<sub>18</sub>ClFN<sub>4</sub>NaO<sub>5</sub> 459.0842; Found 459.0831.

**IR**(neat): 2985, 1742, 1594, 1497, 1452, 1216, 1104, 924, 731.

**Diethyl 2-((2,6-dichloro-9H-purin-9-yl)(phenyl)methoxy)malonate (7e)**

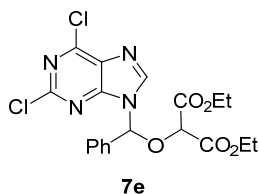

Prepared according to general procedure A using phenyl oxiranyl dicarboxylate **2a** (26.4 mg, 0.1 mmol, 1.0 equiv), purine **6e** (18.8 mg, 0.1 mmol), Y(OTf)<sub>3</sub> (2.7 mg, 0.005 mmol, 5 mol%), and activated 4Å molecular sieve (30 mg) in DCE (2 mL) at 80 °C for 10 h. Purification by preparative thin layer chromatography using Pet/EtOAc system (Pet/EtOAc, 3/1, v/v) to give product **7e** as a thick colorless oil (35.7 mg, 79% yield).

**R<sub>f</sub>** = 0.55 (Pet/EtOAc, 2/1, v/v).

**<sup>1</sup>H NMR** (400 MHz, CDCl<sub>3</sub>) δ 8.09 (s, 1H), 7.49 - 7.48 (m, 2H), 7.43 - 7.41 (m, 3H), 7.08 (s, 1H), 4.76 (s, 1H), 4.34 - 4.26 (m, 2H), 4.13 - 4.05 (m, 2H), 1.29 (t, *J* = 7.2 Hz, 3H), 1.16 (t, *J* = 7.2 Hz, 3H).

**<sup>13</sup>C NMR** (100 MHz, CDCl<sub>3</sub>) δ 165.2, 165.0, 153.6, 153.5, 152.2, 144.6, 134.8, 130.6, 130.2, 129.2, 126.3, 84.3, 77.6, 62.8, 62.7, 14.1, 13.9.

**HRMS** (ESI) *m/z*: [M + Na]<sup>+</sup> Calcd for C<sub>19</sub>H<sub>18</sub>Cl<sub>2</sub>N<sub>4</sub>NaO<sub>5</sub> 475.0546; Found 475.0540.

**IR**(neat): 2292, 1766, 1588, 1558, 1497, 1450, 1208, 1153, 881, 765.

**Diethyl 2-((6-chloro-2-iodo-9H-purin-9-yl)(phenyl)methoxy)malonate (7f)**

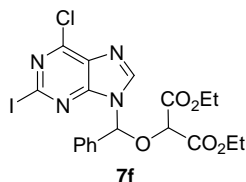

Prepared according to general procedure A using phenyl oxiranyl dicarboxylate **2a** (26.4 mg, 0.1 mmol, 1.0 equiv), purine **6f** (28.0 mg, 0.1 mmol), Y(OTf)<sub>3</sub> (2.7 mg, 0.005 mmol, 5 mol%), and activated 4Å molecular sieve (30 mg) in DCE (2 mL) at 80 °C for 10 h. Purification by preparative thin layer chromatography using Pet/EtOAc system (Pet/EtOAc, 3/1, v/v) to give product **7f** as a thick colorless oil (43.5 mg, 80% yield).

**R<sub>f</sub>** = 0.48 (Pet/EtOAc, 2/1, v/v).

**<sup>1</sup>H NMR** (400 MHz, CDCl<sub>3</sub>) δ 8.09 (s, 1H), 7.49 - 7.46(m, 2H), 7.42 - 7.40 (m, 3H), 7.05 (s, 1H), 4.77(s, 1H), 4.31 - 4.28 (m, 2H), 4.10 - 4.06 (m, 2H), 1.28 (t, *J* = 7.2 Hz, 3H), 1.15 (t, *J* = 7.2 Hz, 3H).

**<sup>13</sup>C NMR** (100 MHz, CDCl<sub>3</sub>) δ 165.2, 165.0, 153.2, 149.5, 143.9, 137.8, 134.8, 130.2, 129.2, 126.2, 122.8, 84.2, 62.8, 62.7, 14.1, 13.9.

**HRMS** (ESI) *m/z*: [M + Na]<sup>+</sup> Calcd for C<sub>19</sub>H<sub>18</sub>ClIN<sub>4</sub>NaO<sub>5</sub> 556.9903; Found 556.9903.

**IR(neat)**: 2290, 1749, 1589, 1498, 1450, 1220, 1105, 918, 743.

**Diethyl 2-((2-amino-6-(benzyloxy)-9H-purin-9-yl)(phenyl)methoxy)malonate (7g)**

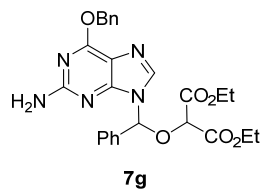

Prepared according to general procedure A using phenyl oxiranyl dicarboxylate **2a** (26.4 mg, 0.1 mmol, 1.0 equiv), purine **6g** (24.1 mg, 0.1 mmol), Y(OTf)<sub>3</sub> (2.7 mg, 0.005 mmol, 5 mol%), and activated 4Å molecular sieve (30 mg) in DCE (2 mL) at 80 °C for 10 h. Purification by preparative thin layer chromatography using Pet/EtOAc system (Pet/EtOAc, 2/1, v/v) to give product **7g** as a thick colorless oil (20.2 mg, 40% yield).

**R<sub>f</sub>** = 0.33 (Pet/EtOAc, 1/1, v/v).

**<sup>1</sup>H NMR** (400 MHz, CDCl<sub>3</sub>) δ 7.57 (s, 1H), 7.52 - 7.46 (m, 4H), 7.40 - 7.30 (m, 6H), 6.93 (s, 1H), 5.57 (s, 2H), 4.95 (s, 2H), 4.81 (s, 1H), 4.35 - 4.26 (m, 2H), 4.06 (q, *J* = 7.2 Hz, 2H), 1.29 (t, *J* = 7.2 Hz, 3H), 1.14 (t, *J* = 7.2 Hz, 3H).

**<sup>13</sup>C NMR** (100 MHz, CDCl<sub>3</sub>) δ 166.0, 165.4, 161.2, 159.7, 154.8, 138.0, 136.4, 136.1, 129.5, 128.8, 128.5, 128.4, 128.2, 126.4, 115.0, 83.0, 77.1, 68.3, 62.5, 62.4, 14.2, 13.9.

**HRMS** (ESI) *m/z*: [M + H]<sup>+</sup> Calcd for C<sub>26</sub>H<sub>28</sub>N<sub>5</sub>O<sub>6</sub> 506.2034; Found 506.2050.

**IR**(neat): 3452, 3344, 3224, 2980, 1741, 1579, 1470, 1458, 1206, 1142, 996, 790.

**Diethyl 2-((2-chloro-6-(dimethylamino)-9H-purin-9-yl)(phenyl)methoxy)malonate (7h)**

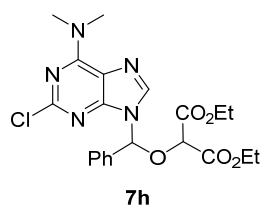

Prepared according to general procedure A using phenyl oxiranyl dicarboxylate **2a** (26.4 mg, 0.1 mmol, 1.0 equiv), purine **6h** (19.7 mg, 0.1 mmol), Y(OTf)<sub>3</sub> (2.7 mg, 0.005 mmol, 5 mol%), and activated 4Å molecular sieve (30 mg) in DCE (2 mL) at 80 °C for 10 h. Purification by preparative thin layer chromatography using Pet/EtOAc system (Pet/EtOAc, 3/1, v/v) to give product **7h** as a thick colorless oil (29.0 mg, 63% yield).

**R<sub>f</sub>** = 0.50 (Pet/EtOAc, 2/1, v/v).

**<sup>1</sup>H NMR** (400 MHz, CDCl<sub>3</sub>) δ 7.65 (s, 1H), 7.49 - 7.47 (m, 2H), 7.40 - 7.38 (m, 3H), 7.03 (s, 1H), 4.78 (s, 1H), 4.36 - 4.28(m, 2H), 4.14 - 4.06 (m, 2H), 3.69 (s, 3H), 3.34 (s, 3H), 1.31 (t, *J* = 7.2 Hz, 3H), 1.18 (t, *J* = 7.2 Hz, 3H).

**<sup>13</sup>C NMR** (100 MHz, CDCl<sub>3</sub>) δ 165.8, 165.4, 155.3, 154.5, 152.5, 137.4, 136.0, 129.6, 128.9, 126.4, 118.5, 83.2, 77.3, 62.6, 62.4, 14.2, 14.0.

**HRMS** (ESI) *m/z*: [M + Na]<sup>+</sup> Calcd for C<sub>21</sub>H<sub>24</sub>ClN<sub>5</sub>NaO<sub>5</sub> 484.1358; Found 484.1357.

**IR(neat)**: 2984, 1765, 1598, 1554, 1498, 1476, 1214, 1280, 1116, 970, 723.

**Diethyl 2-((2-chloro-9H-purin-9-yl)(phenyl)methoxy)malonate (7i)**

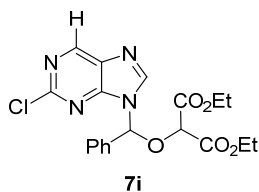

Prepared according to general procedure A using phenyl oxiranyl dicarboxylate **2a** (26.4 mg, 0.1 mmol, 1.0 equiv), purine **6i** (15.4 mg, 0.1 mmol), Y(OTf)<sub>3</sub> (2.7 mg, 0.005 mmol, 5 mol%), and activated 4Å molecular sieve (30 mg) in DCE (2 mL) at 80 °C for 10 h. Purification by preparative thin layer chromatography using Pet/EtOAc system (Pet/EtOAc, 3/1, v/v) to give product **7i** as a white solid (21.3 mg, 51% yield).

**m.p.** : 79.6 - 89.7 °C.

**R<sub>f</sub>** = 0.55 (Pet/EtOAc, 2/1, v/v).

**<sup>1</sup>H NMR** (600 MHz, CDCl<sub>3</sub>) δ 9.00 (s, 1H), 8.07 (s, 1H), 7.51 - 7.50 (m, 2H), 7.43 (t, *J* = 3.6 Hz, 3H), 7.13 (s, 1H), 4.79 (s, 1H), 4.33 - 4.28 (m, 2H), 4.10 - 4.03 (m, 2H), 1.30 (t, *J* = 7.2 Hz, 3H), 1.15 (t, *J* = 7.2 Hz, 3H).

**<sup>13</sup>C NMR** (150 MHz, CDCl<sub>3</sub>) δ 165.3, 165.1, 155.1, 153.6, 150.7, 144.8, 135.1, 132.9, 130.1, 129.2, 126.3, 83.7, 77.7, 62.8, 62.6, 14.1, 13.9.

**HRMS** (ESI) *m/z*: [M + Na]<sup>+</sup> Calcd for C<sub>19</sub>H<sub>19</sub>ClN<sub>4</sub>NaO<sub>5</sub> 441.0936; Found 441.0935.

**IR**(neat): 2981, 1769, 1593, 1573, 1492, 1449, 1229, 1120, 924, 747.

**Diethyl 2-((2-chloro-7H-purin-7-yl)(phenyl)methoxy)malonate (7i')**

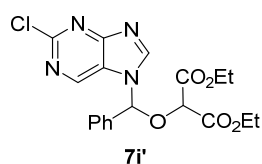

Prepared according to general procedure A using phenyl oxiranyl dicarboxylate **2a** (26.4 mg, 0.1 mmol, 1.0 equiv), purine **6i** (15.4 mg, 0.1 mmol), Y(OTf)<sub>3</sub> (2.7 mg, 0.005 mmol, 5 mol%), and activated 4Å molecular sieve (30 mg) in DCE (2 mL) at 80 °C for 10 h. Purification by preparative thin layer chromatography using Pet/EtOAc system (Pet/EtOAc, 2/1, v/v) to give product **7i'** as a thick colorless oil (5.85 mg, 14% yield).

**R<sub>f</sub>** = 0.41 (Pet/EtOAc, 1/1, v/v).

**<sup>1</sup>H NMR** (600 MHz, CDCl<sub>3</sub>) δ 8.75 (s, 1H), 8.29 (s, 1H), 7.49 - 7.44 (m, 5H), 6.86 (s, 1H), 4.63 (s, 1H), 4.31 - 4.15 (m, 4H), 1.28 (t, *J* = 7.2 Hz, 3H), 1.21 (t, *J* = 7.2 Hz, 3H).

**<sup>13</sup>C NMR** (100 MHz, CDCl<sub>3</sub>) δ 165.2, 165.1, 163.6, 155.6, 148.4, 144.5, 133.6, 131.0, 129.7, 126.8, 123.6, 87.2, 76.1, 62.9, 14.1, 14.0.

**HRMS** (ESI) *m/z*: [M + Na]<sup>+</sup> Calcd for C<sub>19</sub>H<sub>19</sub>ClN<sub>4</sub>NaO<sub>5</sub> 441.0936; Found 441.0932.

**IR**(neat): 2981, 1770, 1589, 1555, 1498, 1450, 1229, 1119, 925, 747.



**Diethyl 2-((2-(chloromethyl)-1H-benzo[d]imidazol-1-yl)(phenyl)methoxy)malonate (7j)**

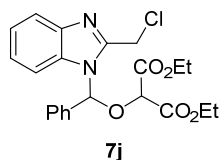

Prepared according to general procedure A using phenyl oxiranyl dicarboxylate **2a** (26.4 mg, 0.1 mmol, 1.0 equiv), imidazole **6j** (16.6 mg, 0.1 mmol), Y(OTf)<sub>3</sub> (2.7 mg, 0.005 mmol, 5 mol%), and activated 4Å molecular sieve (30 mg) in DCE (2 mL) at 80 °C for 10 h. Purification by preparative thin layer chromatography using Pet/EtOAc system (Pet/EtOAc, 5/1, v/v) to give product **7j** as a colorless solid (34.4 mg, 80% yield).

**m.p.** : 85.7 - 96.0 °C.

**R<sub>f</sub>** = 0.55 (Pet/EtOAc, 4/1, v/v).

**<sup>1</sup>H NMR** (400 MHz, CDCl<sub>3</sub>) δ 7.79 - 7.77 (m, 1H), 7.34 - 7.31 (m, 6H), 7.29 - 7.25 (m, 1H), 7.19 - 7.15 (m, 1H), 7.07 (s, 1H), 4.91 (d, *J* = 13.2 Hz, 1H), 4.76 (d, *J* = 12.8 Hz, 1H), 4.68 (s, 1H), 4.35 - 4.25 (m, 2H), 4.05 - 3.99 (m, 2H), 1.29 (t, *J* = 7.2 Hz, 3H), 1.09 (t, *J* = 7.2 Hz, 3H).

**<sup>13</sup>C NMR** (100 MHz, CDCl<sub>3</sub>) δ 166.3, 165.0, 149.4, 142.6, 135.8, 134.0, 129.4, 128.9, 126.3, 124.4, 123.5, 120.5, 113.3, 85.1, 75.9, 62.7, 62.4, 37.1, 14.2, 13.9.

**HRMS** (ESI) *m/z*: [M + Na]<sup>+</sup> Calcd for C<sub>22</sub>H<sub>23</sub>N<sub>2</sub>NaO<sub>5</sub> 453.1188; Found 453.1188.

**IR**(neat): 2924, 1760, 1518, 1495, 1450, 1234, 1098, 959, 740.

**Diethyl 2-((4,5-diphenyl-1H-imidazol-1-yl)(phenyl)methoxy)malonate (7k)**

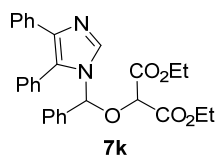

Prepared according to general procedure A using phenyl oxiranyl dicarboxylate **2a** (26.4 mg, 0.1 mmol, 1.0 equiv), imidazole **6k** (22.0 mg, 0.1 mmol), Y(OTf)<sub>3</sub> (2.7 mg, 0.005 mmol, 5 mol%), and activated 4Å molecular sieve (30 mg) in DCE (2 mL) at 80 °C for 10 h. Purification by preparative thin layer chromatography using Pet/EtOAc system (Pet/EtOAc, 5/1, v/v) to give product **7k** as a thick colorless oil (39.2 mg, 81% yield).

**R<sub>f</sub>** = 0.53 (Pet/EtOAc, 4/1, v/v).

**<sup>1</sup>H NMR** (400 MHz, CDCl<sub>3</sub>) δ 7.80 (m, 1H), 7.52 - 7.49 (m, 2H), 7.43 - 7.41 (m, 3H), 7.37 (s, 5H), 7.33 - 7.30 (m, 2H), 7.24 - 7.16 (m, 3H), 6.22 (s, 1H), 4.51 (s, 1H), 4.23 - 4.08 (m, 4H), 1.26 (t, *J* = 7.2 Hz, 3H), 1.21 (t, *J* = 7.2 Hz, 3H).

**<sup>13</sup>C NMR** (100 MHz, CDCl<sub>3</sub>) δ 165.8, 165.1, 138.1, 137.1, 136.1, 134.1, 131.2, 129.9, 129.4, 129.4, 129.3, 128.8, 128.7, 128.3, 126.8, 126.8, 126.4, 84.6, 76.1, 62.6, 62.4, 14.1.

**HRMS** (ESI) *m/z*: [M + Na]<sup>+</sup> Calcd for C<sub>29</sub>H<sub>28</sub>N<sub>2</sub>NaO<sub>5</sub> 507.1890; Found 507.1891.

**IR**(neat): 2923, 1742, 1603, 1503, 1444, 1231, 1108, 951, 696.

**diethyl 2-((3,5-dimethyl-4-nitro-1*H*-pyrazol-1-yl)(phenyl)methoxy)malonate (71)**

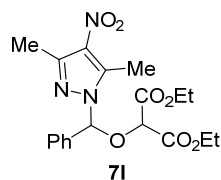

Prepared according to general procedure A using phenyl oxiranyl dicarboxylate **2a** (26.4 mg, 0.1 mmol, 1.0 equiv), pyrazole **6l** (16.0 mg, 0.1 mmol), Y(OTf)<sub>3</sub> (2.7 mg, 0.005 mmol, 5 mol%), and activated 4Å molecular sieve (30 mg) in DCE (2 mL) at 80 °C for 10 h. Purification by preparative thin layer chromatography using Pet/EtOAc system (Pet/EtOAc, 5/1, v/v) to give product **71** as a thick colorless oil (37.3 mg, 92% yield).

**R<sub>f</sub>** = 0.50 (Pet/EtOAc, 4/1, v/v).

**<sup>1</sup>H NMR** (400 MHz, CDCl<sub>3</sub>) δ 7.39 - 7.34 (m, 5H), 6.70 (s, 1H), 4.71 (s, 1H), 4.36 - 4.26 (m, 2H), 4.17 (q, *J* = 7.2 Hz, 2H), 1.31 (t, *J* = 7.2 Hz, 3H), 1.23 (t, *J* = 7.2 Hz, 3H).

**<sup>13</sup>C NMR** (100 MHz, CDCl<sub>3</sub>) δ 165.7, 165.1, 146.0, 142.3, 135.4, 133.2, 129.5, 128.9, 125.8, 92.5, 76.8, 62.7, 62.5, 14.3, 14.2, 14.0, 11.9.

**HRMS** (ESI) *m/z*: [M + Na]<sup>+</sup> Calcd for C<sub>19</sub>H<sub>23</sub>N<sub>3</sub>NaO<sub>7</sub> 428.1428; Found 428.1425.

**IR**(neat): 2983, 1760, 1620, 1550, 1496, 1444, 1371, 1250, 950, 796.

**2-((2-amino-6-(benzyloxy)-9H-purin-9-yl)(phenyl)methoxy)propane-1,3-diol (8g)**

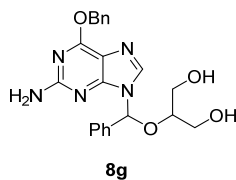

**R<sub>f</sub>** = 0.40 (DCM/MeOH, 10/1, v/v).

**<sup>1</sup>H NMR** (600 MHz, CDCl<sub>3</sub>) δ 7.55 - 7.54 (m, 2H), 7.48 - 7.45 (m, 5H), 7.35 - 7.32 (m, 2H), 7.31 - 7.28 (m, 1H), 7.10 (s, 1H), 6.83 (s, 1H), 5.55 (s, 2H), 5.08 (s, 2H), 3.88 (dd, *J* = 3.0, 12.6 Hz, 2H), 3.80 - 3.73 (m, 2H), 3.69 (dd, *J* = 1.8, 4.2 Hz, 2H).

**<sup>13</sup>C NMR** (150 MHz, CDCl<sub>3</sub>) δ 161.6, 159.3, 153.9, 137.8, 136.3, 135.1, 130.3, 129.4, 128.6, 128.4, 128.2, 127.4, 116.1, 83.9, 79.0, 68.4, 62.9, 62.5.

**HRMS** (ESI) *m/z*: [M + Na]<sup>+</sup> Calcd for C<sub>22</sub>H<sub>23</sub>N<sub>5</sub>NaO<sub>4</sub> 444.1642; Found 444.1641.

**IR**(neat): 3450, 3365, 3344, 3325, 3270, 2963, 1580, 1470, 1458, 1210, 1140, 970, 790.

**2-amino-9-(((1,3-dihydroxypropan-2-yl)oxy)(phenyl)methyl)-1,9-dihydro-6H-purin-6-one (9g)**

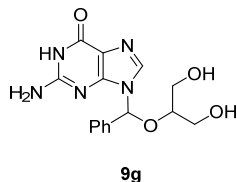

**R<sub>f</sub>** = 0.35 (DCM/MeOH, 10/1, v/v).

**<sup>1</sup>H NMR** (600 MHz, DMSO) δ 10.85 (s, 1H), 7.74 (s, 1H), 7.40 - 7.34 (m, 5H), 6.84 (s, 1H), 6.84 (s, 2H), 4.86 (s, 1H), 4.66 (s, 1H), 3.68 - 3.65 (m, 1H), 3.58 - 3.51 (m, 2H), 3.38 - 3.36 (m, 2H).

**<sup>13</sup>C NMR** (150 MHz, DMSO) δ 156.9, 154.1, 151.3, 138.8, 135.1, 128.7, 128.5, 126.0, 116.3, 82.8, 79.9, 61.0, 60.8.

**HRMS** (ESI) m/z: [M + Na]<sup>+</sup> Calcd for C<sub>15</sub>H<sub>17</sub>N<sub>5</sub>NaO<sub>4</sub> 354.1173; Found 354.1173.

**IR(neat)**: 3449, 3360, 3341, 3330, 3279, 1711, 1631, 1231, 1159, 1470, 1458, 958, 786.

**2-((1*H*-benzo[*d*][1,2,3]triazol-1-yl)(phenyl)methoxy)propane-1,3-diol (10a)**

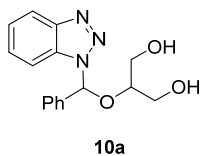

**m.p.** : 69.1 - 80.3 °C.

**R<sub>f</sub>** = 0.32 (Pet/EtOAc, 1/1, v/v).

**<sup>1</sup>H NMR** (600 MHz, CDCl<sub>3</sub>) δ 7.97 - 7.95 (m, 1H), 7.52 (s, 1H), 7.42 - 7.40 (m, 2H), 7.31 (t, *J* = 3.6 Hz, 3H), 7.29 - 7.26 (m, 3H), 4.00 (dd, *J* = 4.8, 12.0 Hz, 1H), 3.93 (dd, *J* = 4.8, 12.0 Hz, 1H), 3.83 - 3.79 (m, 1H), 3.66 (s, 1H), 3.45 (d, *J* = 4.8 Hz, 2H), 2.99 (s, 1H).

**<sup>13</sup>C NMR** (150 MHz, CDCl<sub>3</sub>) δ 146.8, 136.0, 131.4, 129.4, 128.8, 128.0, 126.2, 124.7, 120.1, 111.5, 88.8, 79.1, 62.6, 62.3.

**HRMS** (ESI) *m/z*: [M + Na]<sup>+</sup> Calcd for C<sub>16</sub>H<sub>17</sub>N<sub>3</sub>NaO<sub>3</sub> 322.1162; Found 322.1165.

**IR**(neat): 3364, 3270, 2906, 1611, 1493, 1450, 1281, 1083, 952, 695.

**Ethyl 2-((1*H*-benzo[*d*][1,2,3]triazol-1-yl)(phenyl)methoxy)acetate (11a)**

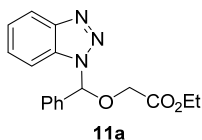

**R<sub>f</sub>** = 0.56 (Pet/EtOAc, 5/1, v/v).

**<sup>1</sup>H NMR** (400 MHz, CDCl<sub>3</sub>) δ 8.08 - 8.06 (m, 1H), 7.48 - 7.45 (m, 2H), 7.38 - 7.35 (m, 4H), 7.34 - 7.29 (m, 2H), 7.22 - 7.19 (m, 1H), 4.21 - 4.15 (m, 4H), 1.23 (t, *J* = 7.2 Hz, 3H).

**<sup>13</sup>C NMR** (100 MHz, CDCl<sub>3</sub>) δ 169.1, 147.2, 135.4, 131.4, 129.4, 128.8, 127.9, 126.3, 124.5, 120.2, 111.9, 89.4, 65.5, 61.4, 14.2.

**HRMS** (ESI) *m/z*: [M + Na]<sup>+</sup> Calcd for C<sub>17</sub>H<sub>17</sub>N<sub>3</sub>NaO<sub>3</sub> 334.1162; Found 334.1160.

**IR**(neat): 2988, 1740, 1629, 1494, 1450, 1245, 1100, 852, 744.

**2-((1*H*-benzo[*d*][1,2,3]triazol-1-yl)(phenyl)methoxy)ethan-1-ol (12a)**

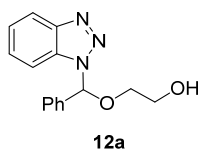

**R<sub>f</sub>** = 0.48 (Pet/EtOAc, 2/1, v/v).

**<sup>1</sup>H NMR** (600 MHz, CDCl<sub>3</sub>) δ 8.06 (d, *J* = 7.8 Hz, 1H), 7.45 - 7.44 (m, 2H), 7.38 - 7.35 (m, 3H), 7.34 - 7.30 (m, 2H), 7.28 (s, 1H), 7.26 (d, *J* = 7.8 Hz, 1H). 3.91 - 3.87 (m, 1H), 3.85 - 3.75 (m, 2H), 3.53 - 3.49 (m, 1H), 2.04 (s, 1H).

**<sup>13</sup>C NMR** (100 MHz, CDCl<sub>3</sub>) δ 147.1, 135.9, 131.2, 129.4, 128.8, 127.8, 126.1, 124.5, 120.2, 111.5, 89.9, 70.8, 61.6.

**HRMS** (ESI) *m/z*: [M + Na]<sup>+</sup> Calcd for C<sub>15</sub>H<sub>15</sub>N<sub>3</sub>NaO<sub>2</sub> 292.1056; Found 292.1056.

**IR**(neat): 3360, 2981, 1630, 1495, 1450, 1240, 1017, 734.



**1-tert-butyl 1,1-diethyl ((1*H*-benzo[*d*][1,2,3]triazol-1-yl) (phenyl)methoxy) methanetricarboxylate (13a)**

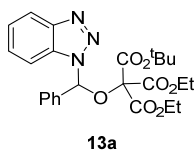

**R<sub>f</sub>** = 0.59 (Pet/EtOAc, 4/1, v/v).

**<sup>1</sup>H NMR** (400 MHz, CDCl<sub>3</sub>) δ 8.02 - 8.00 (m, 2H), 7.53 - 7.47 (m, 3H), 7.35 - 7.28 (m, 5H), 4.20 - 4.12 (m, 2H), 4.07 - 3.95 (m, 2H), 1.39 (s, 9H), 1.11 (td, *J* = 2.4, 7.2 Hz, 6H).

**<sup>13</sup>C NMR** (100 MHz, CDCl<sub>3</sub>) δ 164.3, 164.1, 162.6, 146.9, 136.9, 131.6, 129.1, 128.6, 127.6, 126.1, 124.3, 119.7, 112.5, 86.9, 85.8, 85.2, 63.2, 63.1, 27.7, 13.7.

**HRMS** (ESI) *m/z*: [M + Na]<sup>+</sup> Calcd for C<sub>25</sub>H<sub>29</sub>N<sub>3</sub>NaO<sub>7</sub> 506.1898; Found 506.1894.

**IR**(neat): 2982, 1741, 1615, 1495, 1451, 1249, 1114, 934, 734.

**diethyl 2-((1*H*-benzo[*d*][1,2,3]triazol-1-yl)(phenyl)methoxy)-2-methylmalonate (14a)**

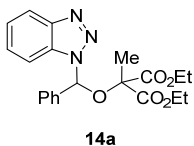

**R<sub>f</sub>** = 0.59 (Pet/EtOAc, 4/1, v/v).

**<sup>1</sup>H NMR** (400 MHz, CDCl<sub>3</sub>) δ 8.04 - 8.02 (m, 1H), 7.75 (s, 1H), 7.43 - 7.40 (m, 3H), 7.34 - 7.31 (m, 5H), 4.11 - 3.94 (m, 4H), 1.71 (s, 3H), 1.13 (td, *J* = 2.8, 7.2 Hz, 6H).

**<sup>13</sup>C NMR** (100 MHz, CDCl<sub>3</sub>) δ 168.5, 168.0, 146.9, 136.8, 131.6, 129.2, 128.6, 127.7, 126.2, 124.4, 119.9, 112.3, 86.2, 82.3, 62.6, 62.3, 20.9, 13.9, 13.8.

**HRMS** (ESI) *m/z*: [M + Na]<sup>+</sup> Calcd for C<sub>21</sub>H<sub>23</sub>N<sub>3</sub>NaO<sub>5</sub> 420.1530; Found 420.1530.

**IR**(neat): 2982, 1740, 1617, 1495, 1454, 1232, 1118, 934, 734.

**diethyl 2-((1*H*-benzo[*d*][1,2,3]triazol-1-yl)(phenyl)methoxy)-2-fluoromalonate (15a)**

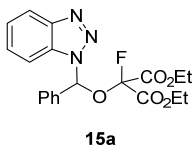

**R<sub>f</sub>** = 0.59 (Pet/EtOAc, 4/1, v/v).

**<sup>1</sup>H NMR** (400 MHz, CDCl<sub>3</sub>) δ 8.07 - 8.04 (m, 1H), 7.86 (s, 1H), 7.43 - 7.30 (m, 8H), 4.25 (q, *J* = 7.2 Hz, 2H), 4.15 - 4.07 (m, 1H), 3.93 - 3.83 (m, 1H), 1.30 (t, *J* = 7.2 Hz, 3H), 1.06 (t, *J* = 7.2 Hz, 3H).

**<sup>13</sup>C NMR** (150 MHz, CDCl<sub>3</sub>) δ 162.2 (d, <sup>2</sup>*J*<sub>C-F</sub> = 38.0 Hz), 162.2 (d, <sup>3</sup>*J*<sub>C-F</sub> = 6.0 Hz), 146.9, 134.6, 131.5, 129.7, 128.9, 128.1, 126.2, 124.6, 120.1, 111.9, 103.0 (d, <sup>1</sup>*J*<sub>C-F</sub> = 164.0 Hz), 84.8 (d, <sup>3</sup>*J*<sub>C-F</sub> = 2.0 Hz), 63.7, 63.6, 13.9, 13.6.

**<sup>19</sup>F NMR** (376 MHz, CDCl<sub>3</sub>): -121.1.

**HRMS** (ESI) *m/z*: [M + Na]<sup>+</sup> Calcd for C<sub>20</sub>H<sub>20</sub>FN<sub>3</sub>NaO<sub>5</sub> 424.1279; Found 424.1277.

**IR**(neat): 2980, 1765, 1745, 1617, 1495, 1450, 1240, 1111, 934, 734.

**2-((1*H*-benzo[*d*][1,2,3]triazol-1-yl)(phenyl)methoxy)-2-fluoropropane-1,3-diol (16a)**

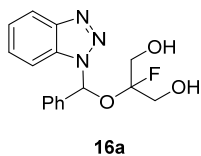

**R<sub>f</sub>** = 0.30 (Pet/EtOAc, 1/1, v/v).

**<sup>1</sup>H NMR** (600 MHz, CDCl<sub>3</sub>) δ 8.02 - 8.00 (m, 1H), 7.91 (s, 1H), 7.39 - 7.36 (m, 5H), 7.33 - 7.29 (m, 2H), 7.19 - 7.17 (m, 1H), 4.09 - 4.01 (m, 2H), 3.85 (d, *J* = 10.2 Hz, 2H), 3.00 (s, 1H), 2.75 (s, 1H).

**<sup>13</sup>C NMR** (150 MHz, CDCl<sub>3</sub>) δ 146.7, 135.6, 131.6, 129.6, 128.9, 128.1, 126.2, 124.7, 120.1, 114.3 (d, <sup>1</sup>*J*<sub>C-F</sub> = 226.5 Hz), 111.7, 83.0 (d, <sup>3</sup>*J*<sub>C-F</sub> = 3.0 Hz), 62.4 (d, <sup>2</sup>*J*<sub>C-F</sub> = 31.5 Hz), 62.0 (d, <sup>2</sup>*J*<sub>C-F</sub> = 34.5 Hz).

**<sup>19</sup>F NMR** (565 MHz, CDCl<sub>3</sub>): -129.6.

**HRMS** (ESI) *m/z*: [M + Na]<sup>+</sup> Calcd for C<sub>16</sub>H<sub>16</sub>FN<sub>3</sub>NaO<sub>3</sub> 340.1068; Found 340.1068.

**IR**(neat): 3393, 2927, 1615, 1496, 1451, 1240, 1058, 937, 731.

## 15. NMR spectra

### $^1\text{H}$ NMR (400 MHz, $\text{CDCl}_3$ ) for **3a**

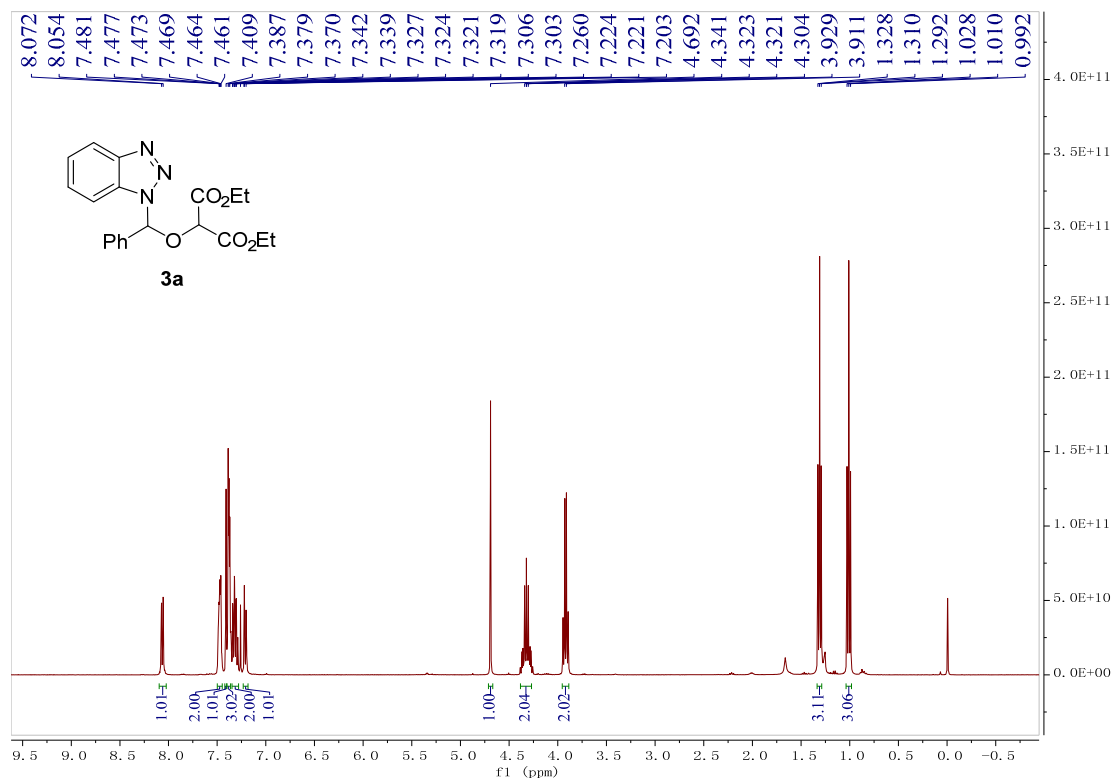

### $^{13}\text{C}$ NMR (100 MHz, $\text{CDCl}_3$ ) for **3a**

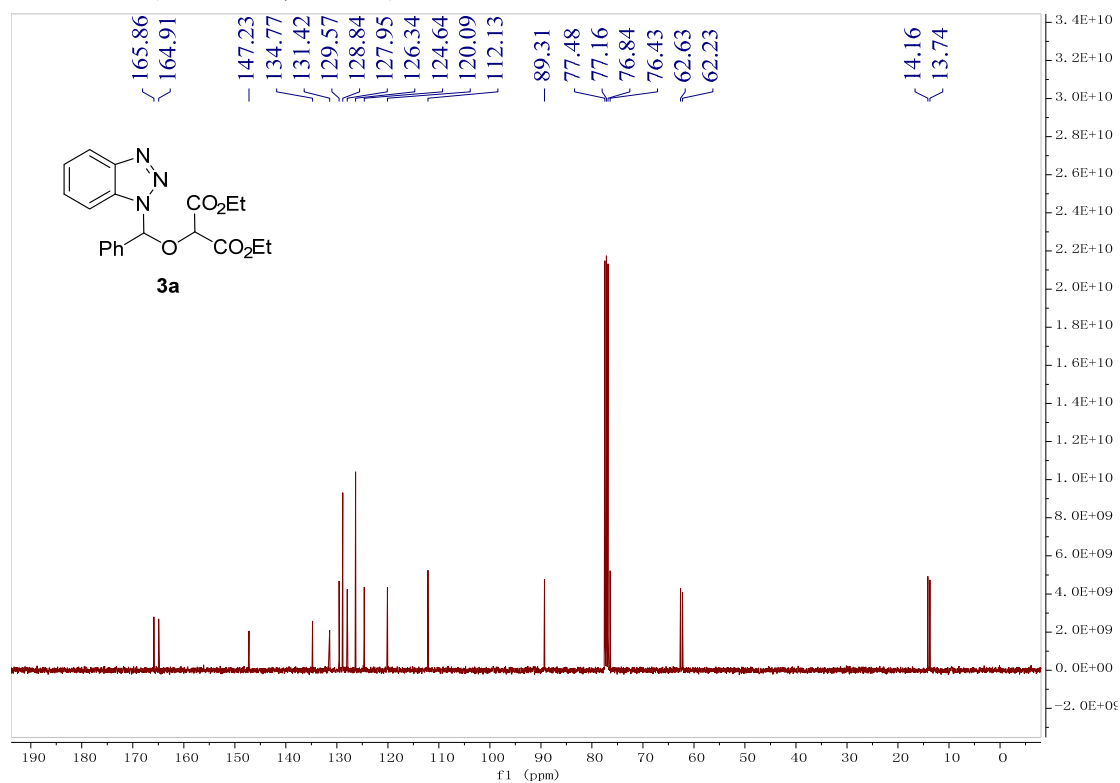

<sup>1</sup>H NMR (400 MHz, CDCl<sub>3</sub>) for 4a

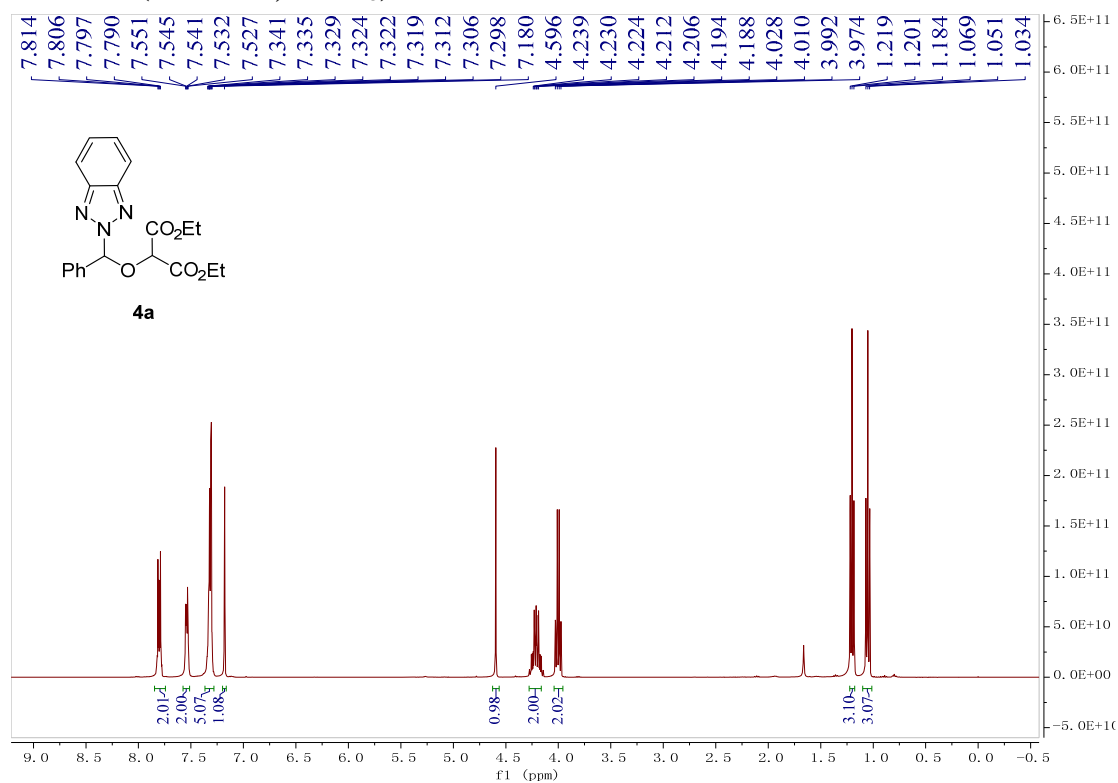

<sup>13</sup>C NMR (100 MHz, CDCl<sub>3</sub>) for 4a

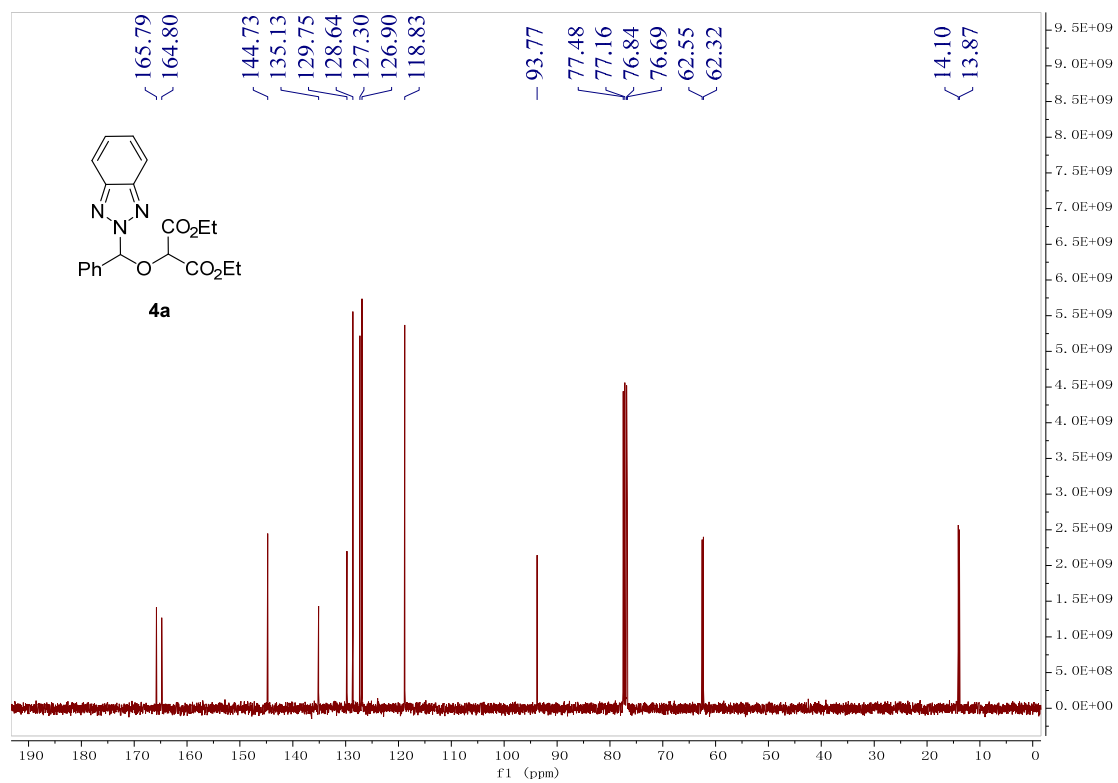

**<sup>1</sup>H NMR (100 MHz, CDCl<sub>3</sub>) for 5a**

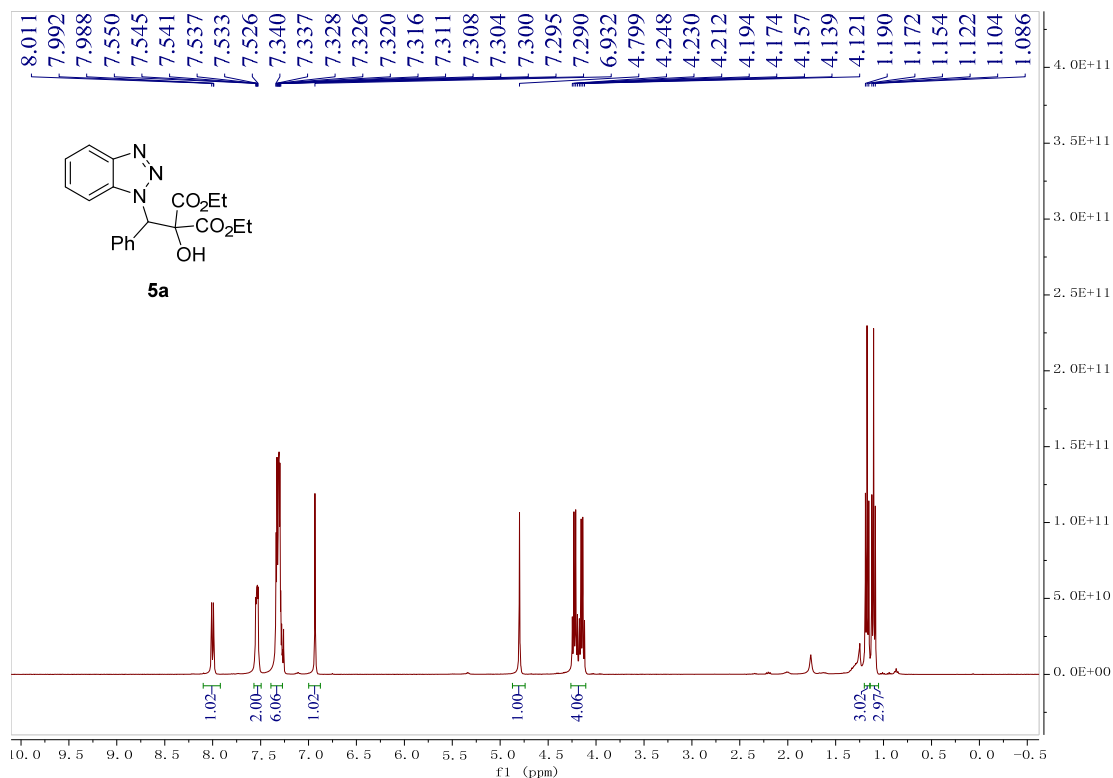

**<sup>1</sup>H NMR (400 MHz, CDCl<sub>3</sub>) for 5a by D<sub>2</sub>O exchange**

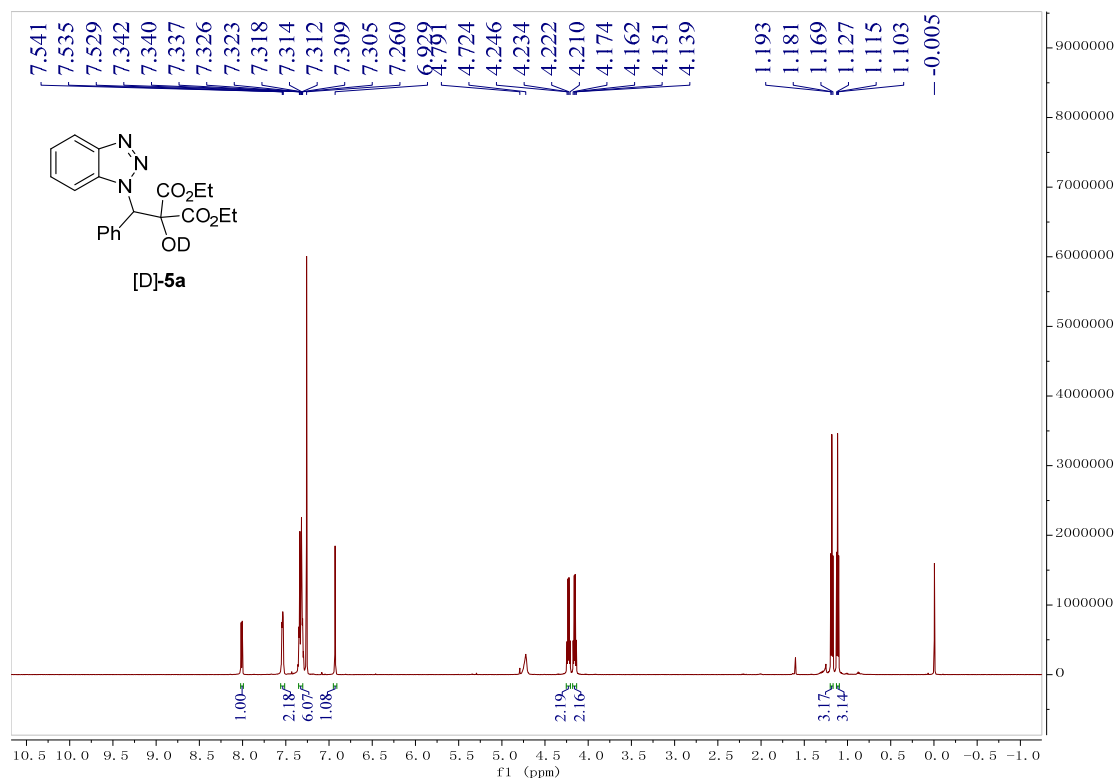

**<sup>13</sup>C NMR (100 MHz, CDCl<sub>3</sub>) for 5a**

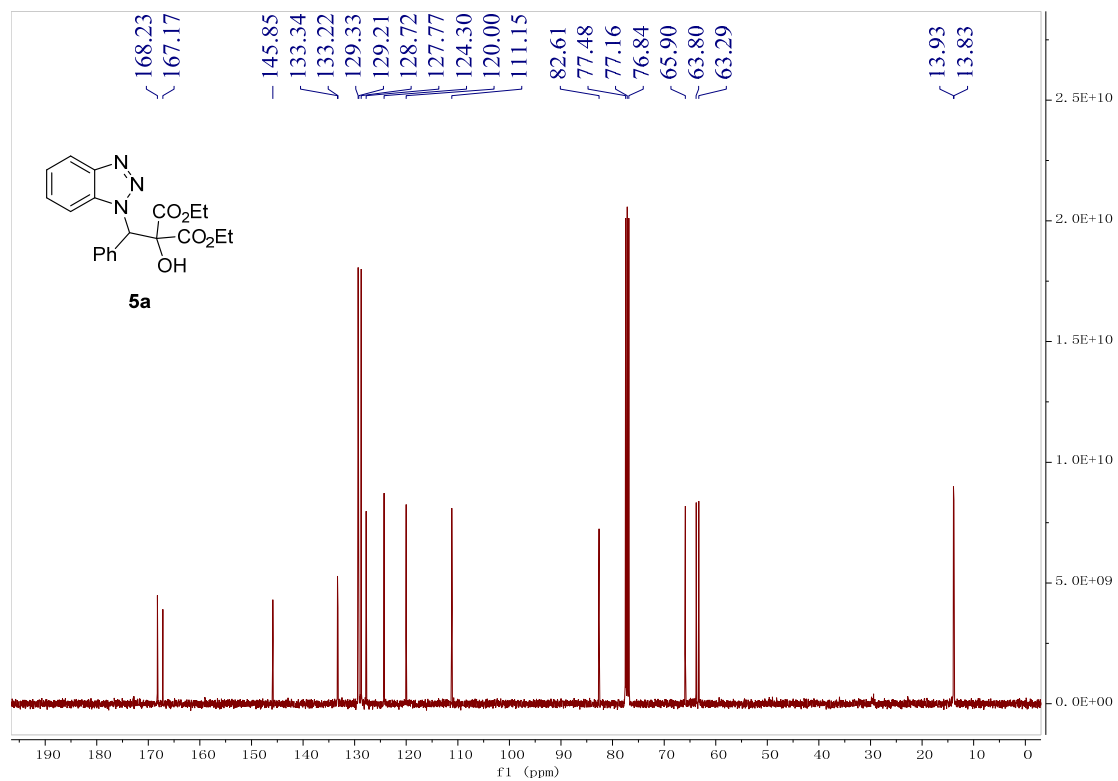



**<sup>1</sup>H NMR (400 MHz, CDCl<sub>3</sub>) for 3b**

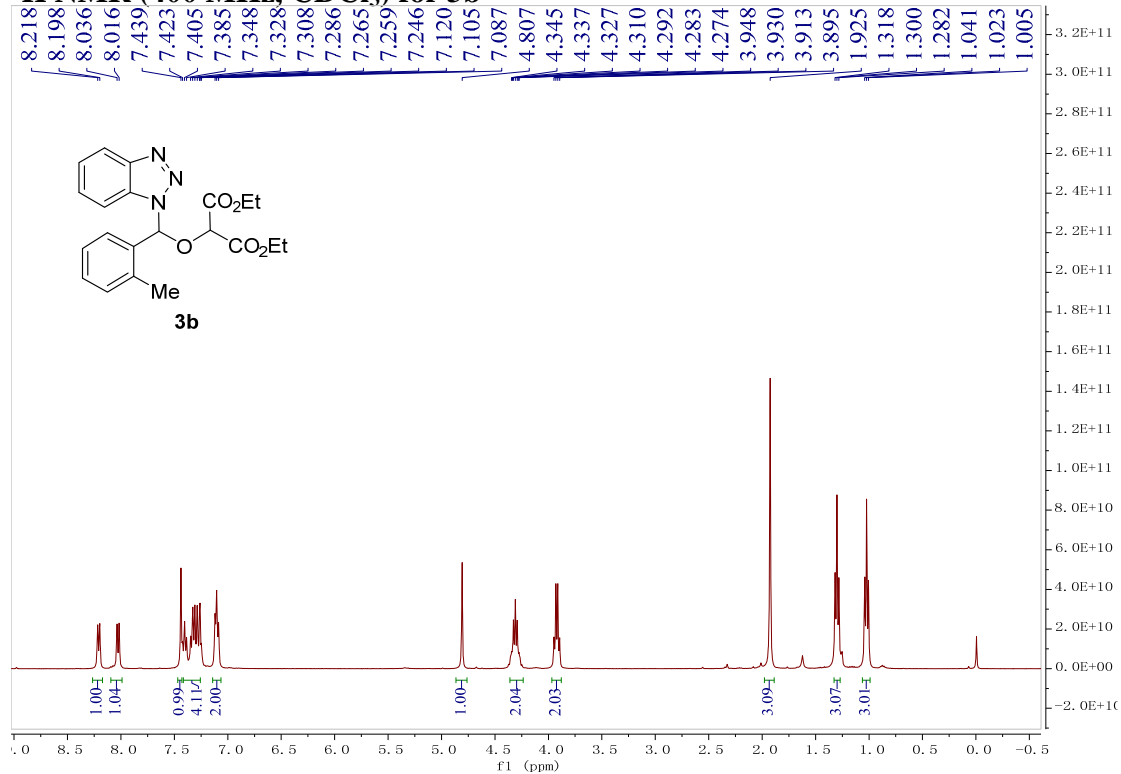

**<sup>13</sup>C NMR (150 MHz, CDCl<sub>3</sub>) for 3b**

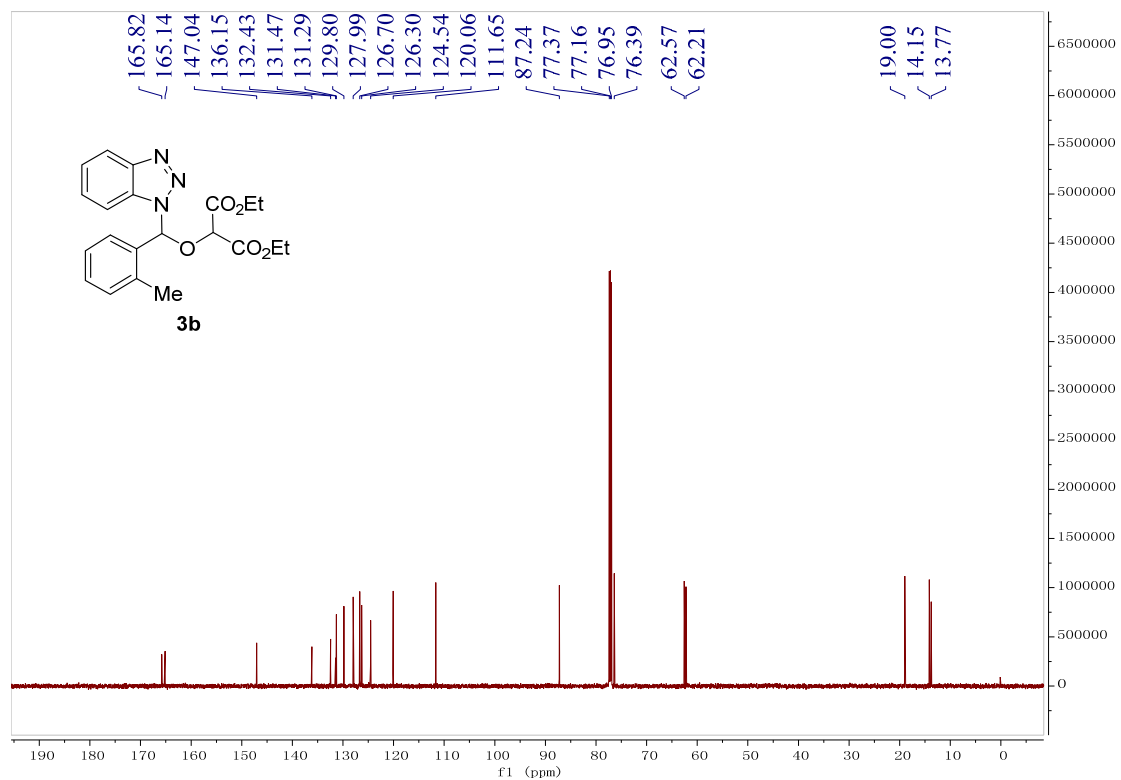

### <sup>1</sup>H NMR (400 MHz, CDCl<sub>3</sub>) for 3c

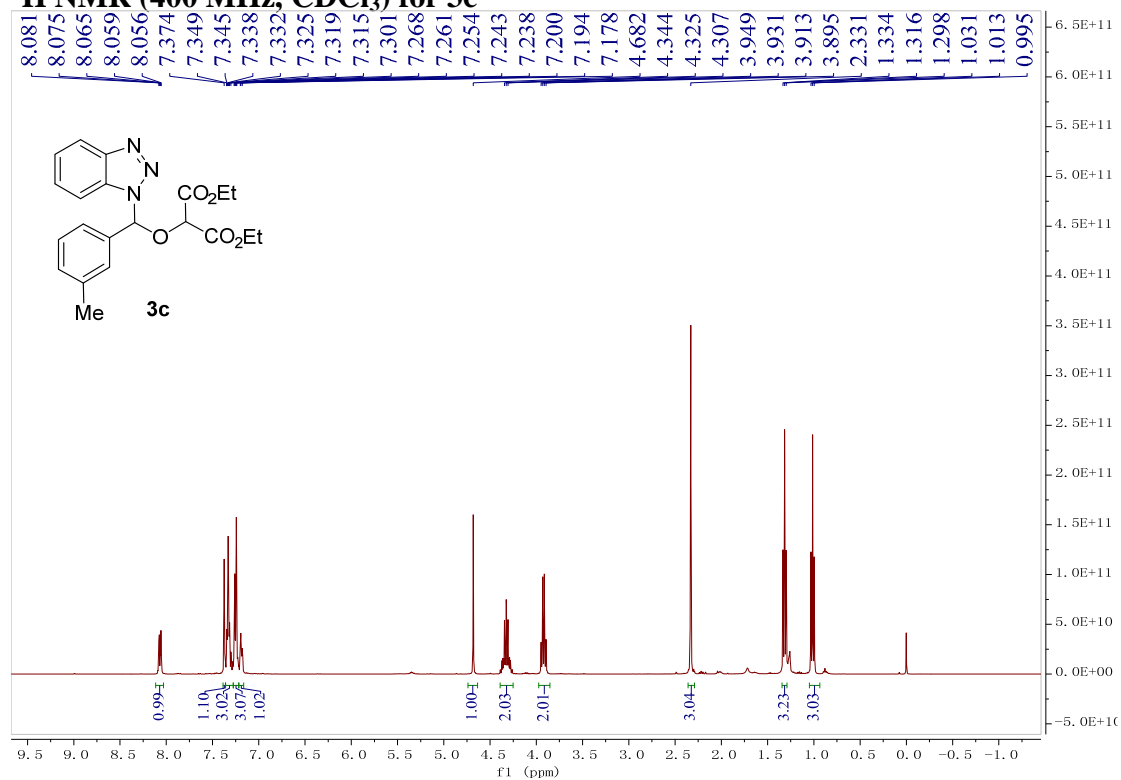

### <sup>13</sup>C NMR (100 MHz, CDCl<sub>3</sub>) for 3c

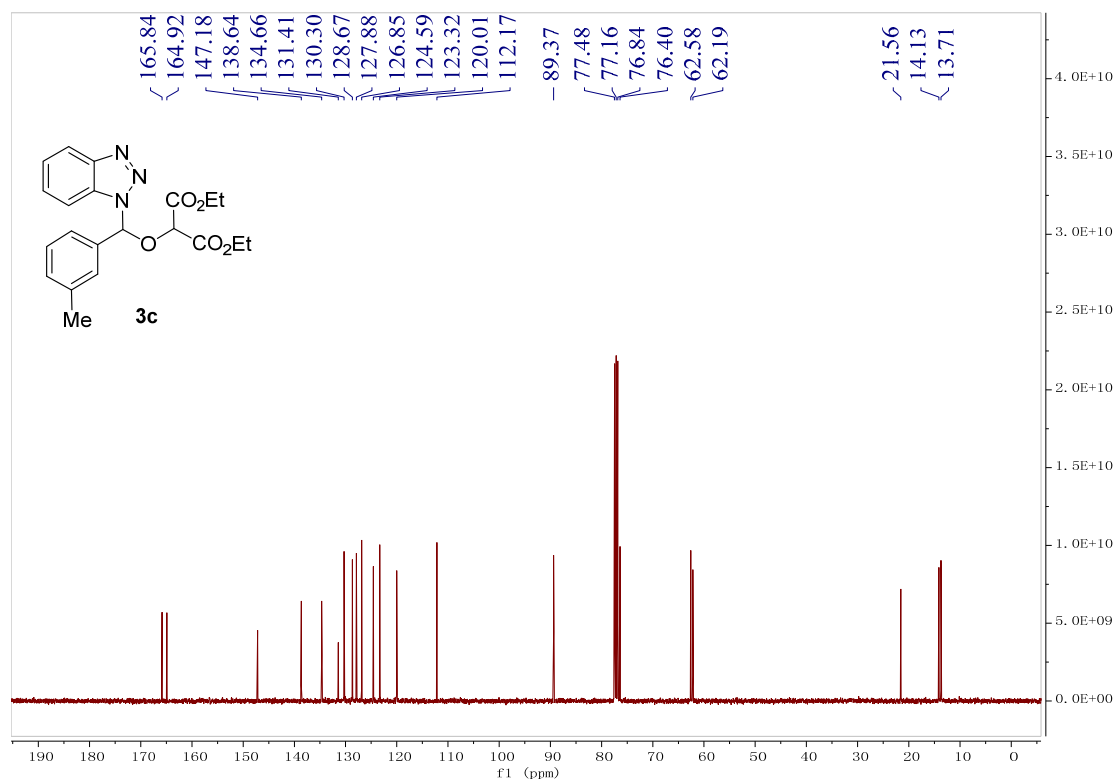

### <sup>1</sup>H NMR (400 MHz, CDCl<sub>3</sub>) for 3d

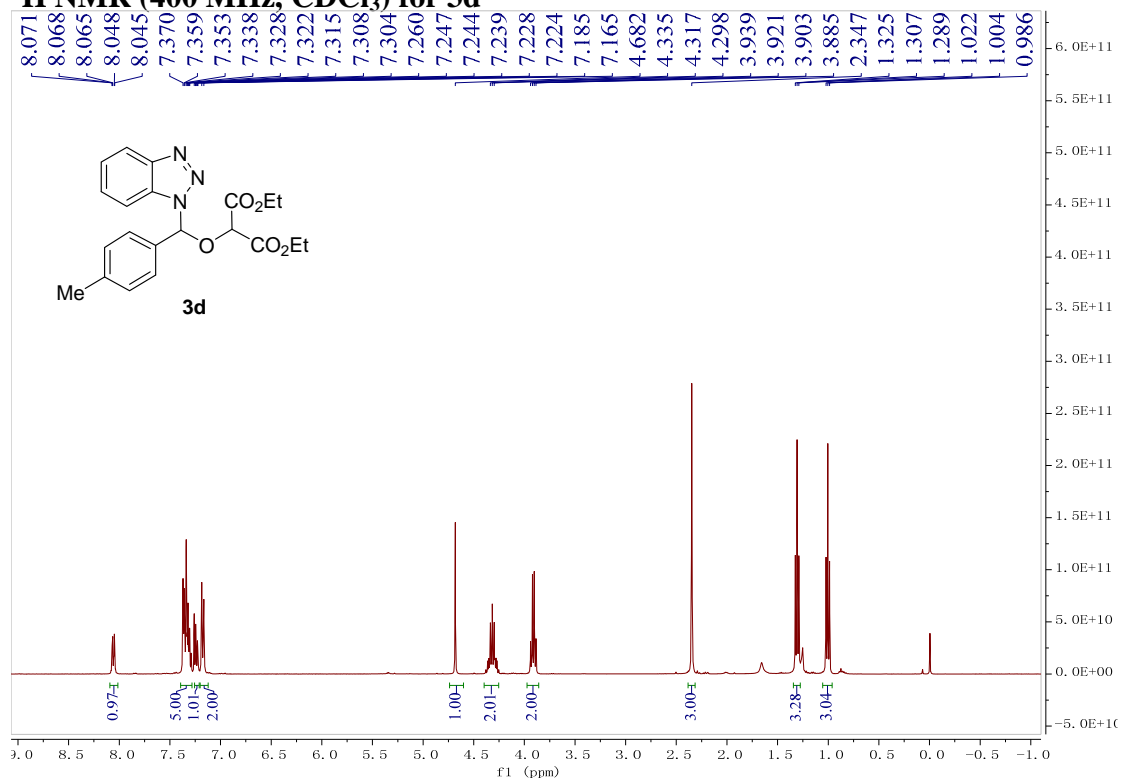

### <sup>13</sup>C NMR (100 MHz, CDCl<sub>3</sub>) for 3d

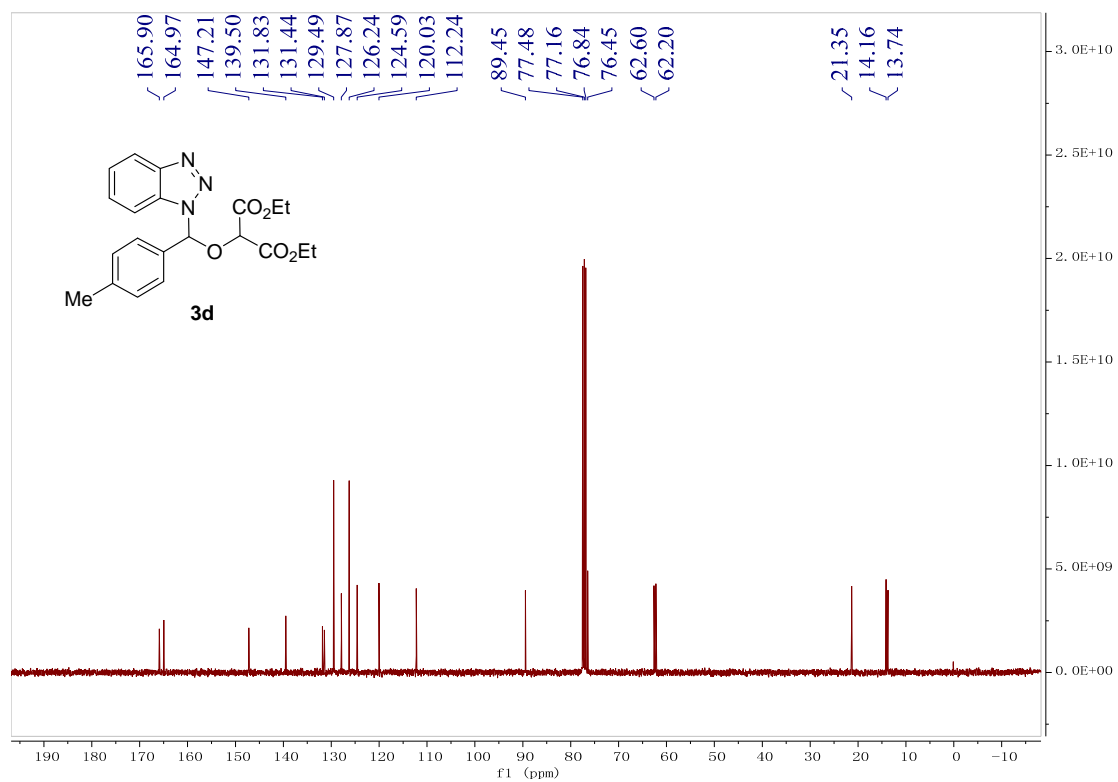

### <sup>1</sup>H NMR (600 MHz, CDCl<sub>3</sub>) for 3e

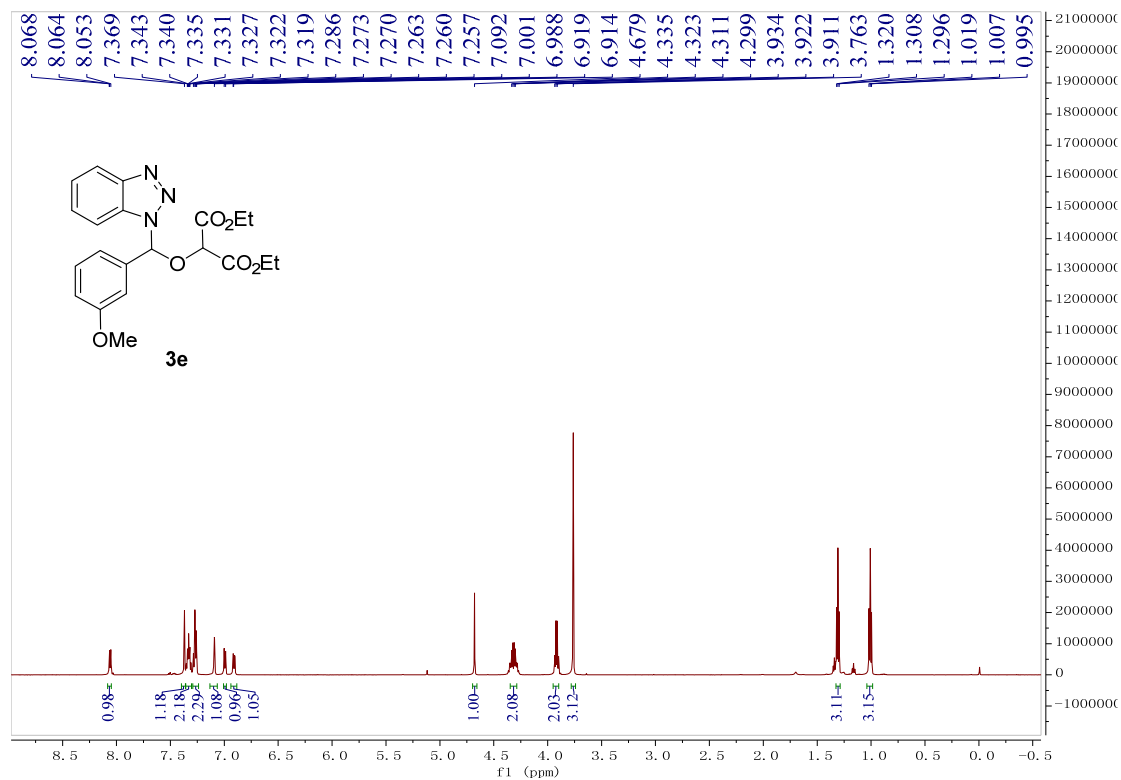

### <sup>13</sup>C NMR (150 MHz, CDCl<sub>3</sub>) for 3e

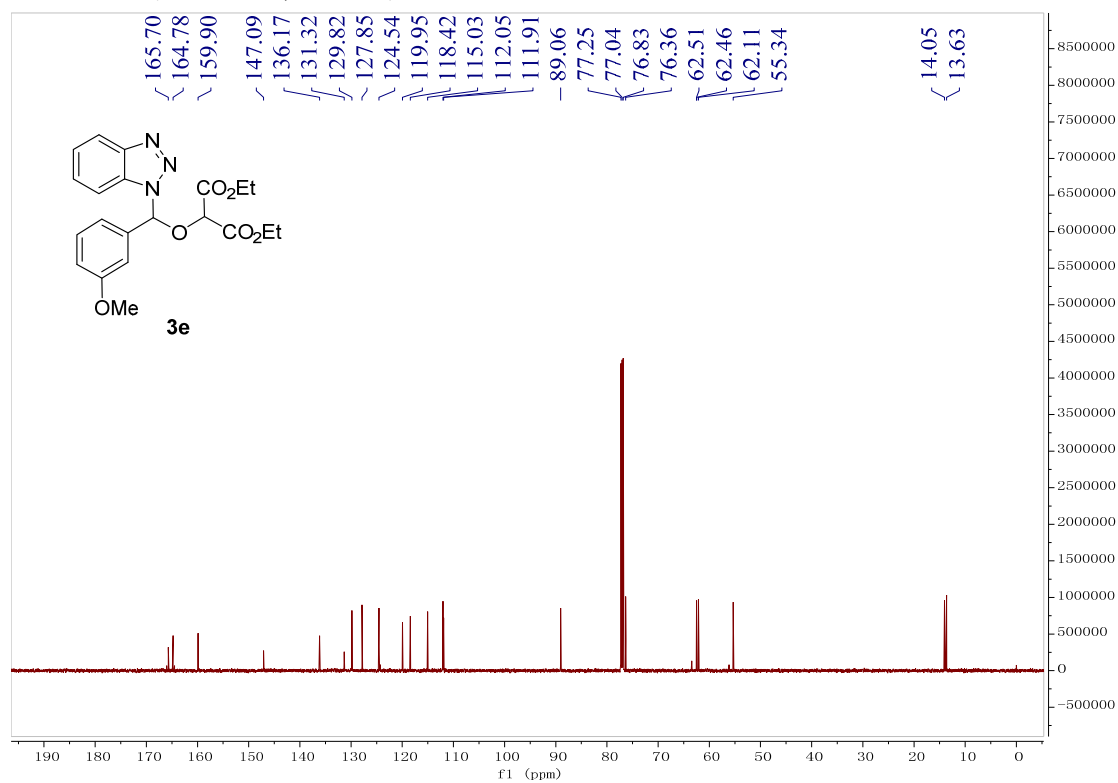

**<sup>1</sup>H NMR (400 MHz, CDCl<sub>3</sub>) for 3f**

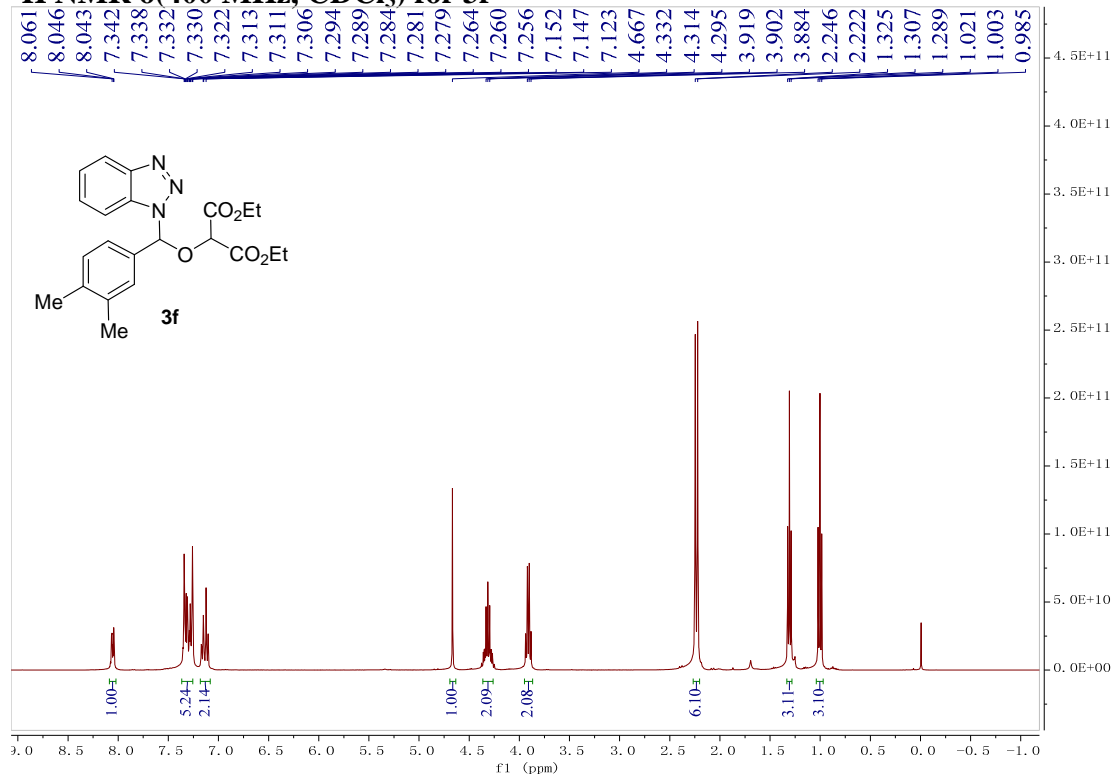

**<sup>13</sup>C NMR (100 MHz, CDCl<sub>3</sub>) for 3f**

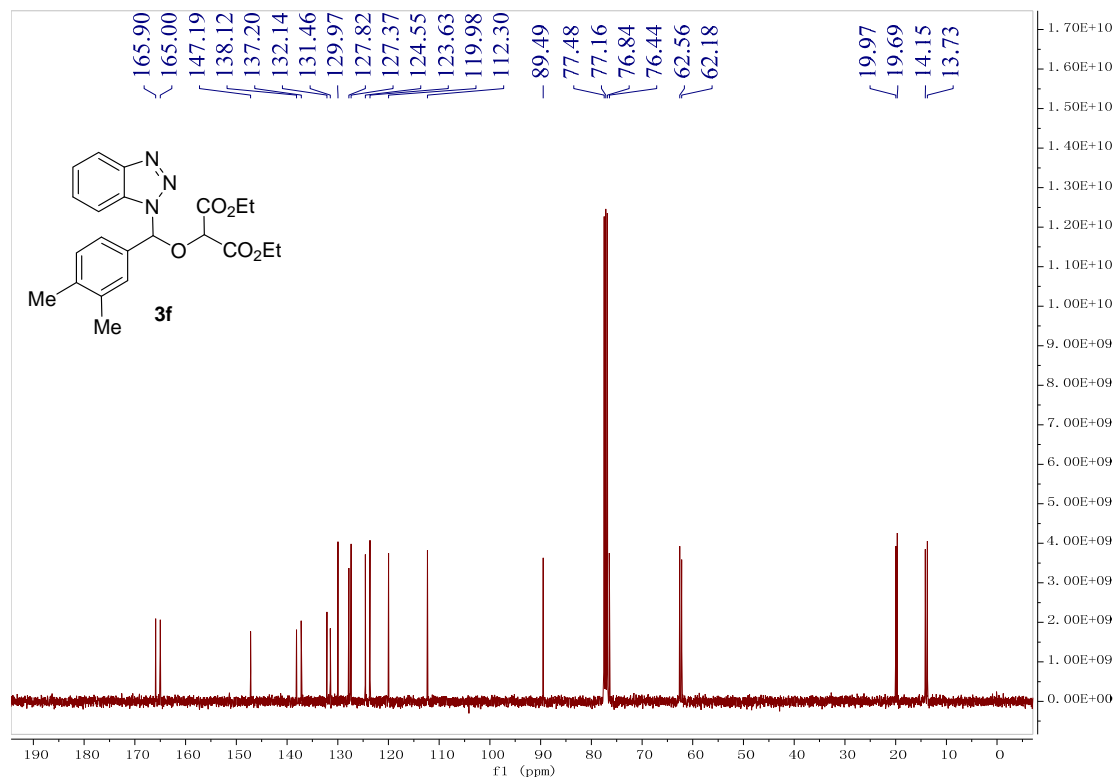

**<sup>1</sup>H NMR (400 MHz, CDCl<sub>3</sub>) for 3g**

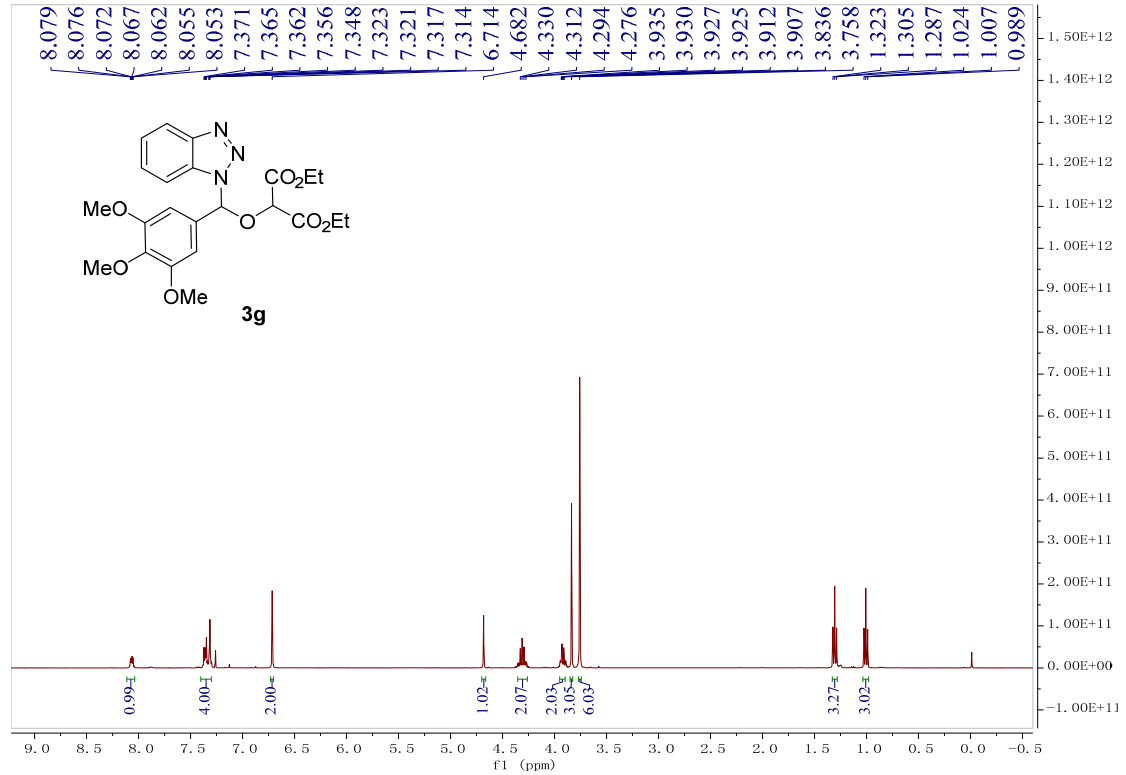

**<sup>13</sup>C NMR (100 MHz, CDCl<sub>3</sub>) for 3g**

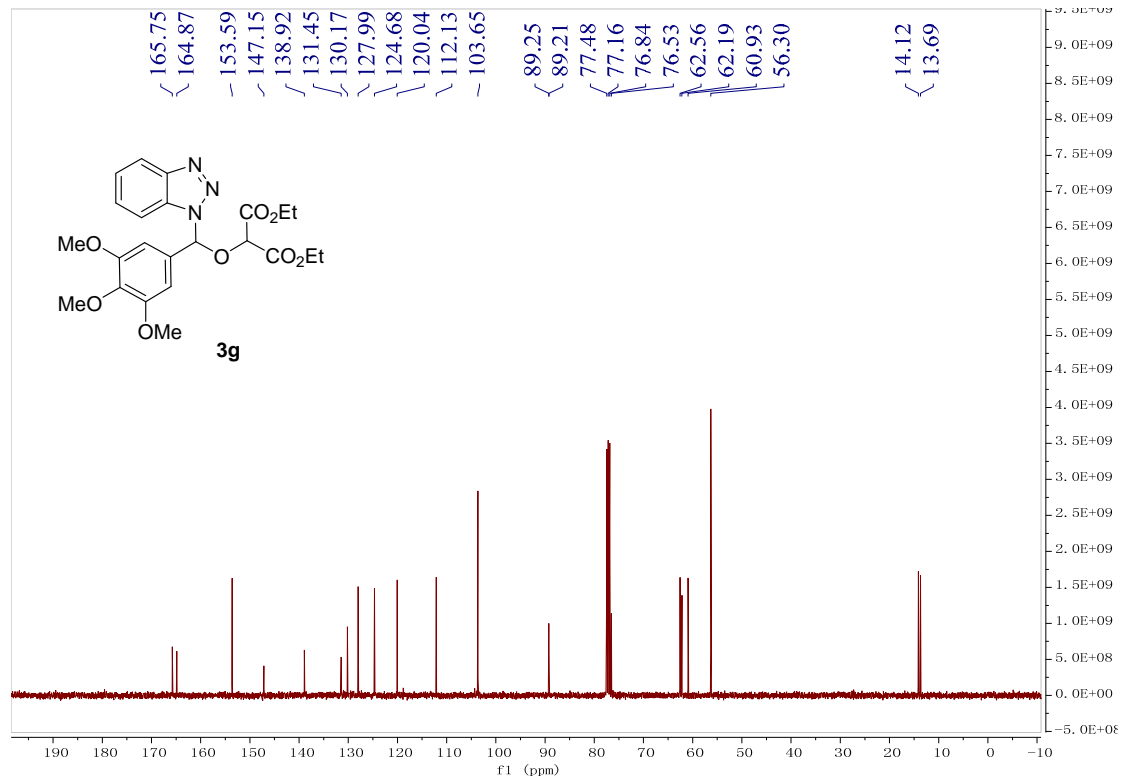

### <sup>1</sup>H NMR (600 MHz, CDCl<sub>3</sub>) for 3h

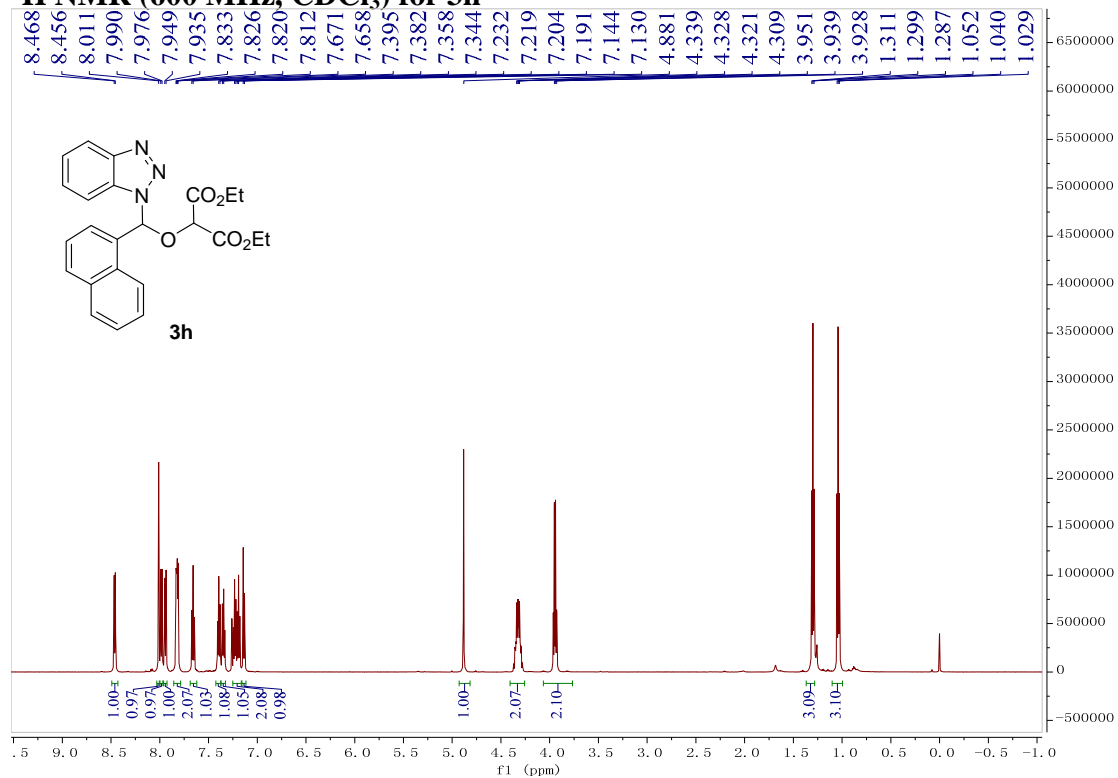

### <sup>13</sup>C NMR (150 MHz, CDCl<sub>3</sub>) for 3h

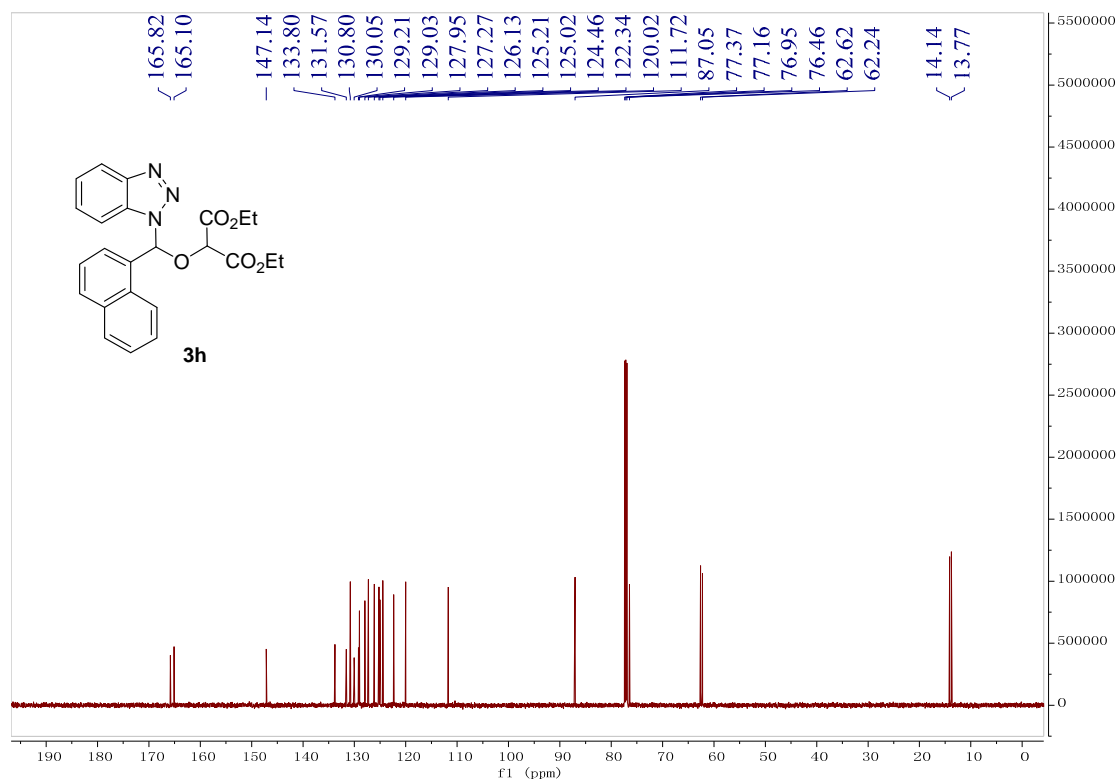

### <sup>1</sup>H NMR (400 MHz, CDCl<sub>3</sub>) for 3i

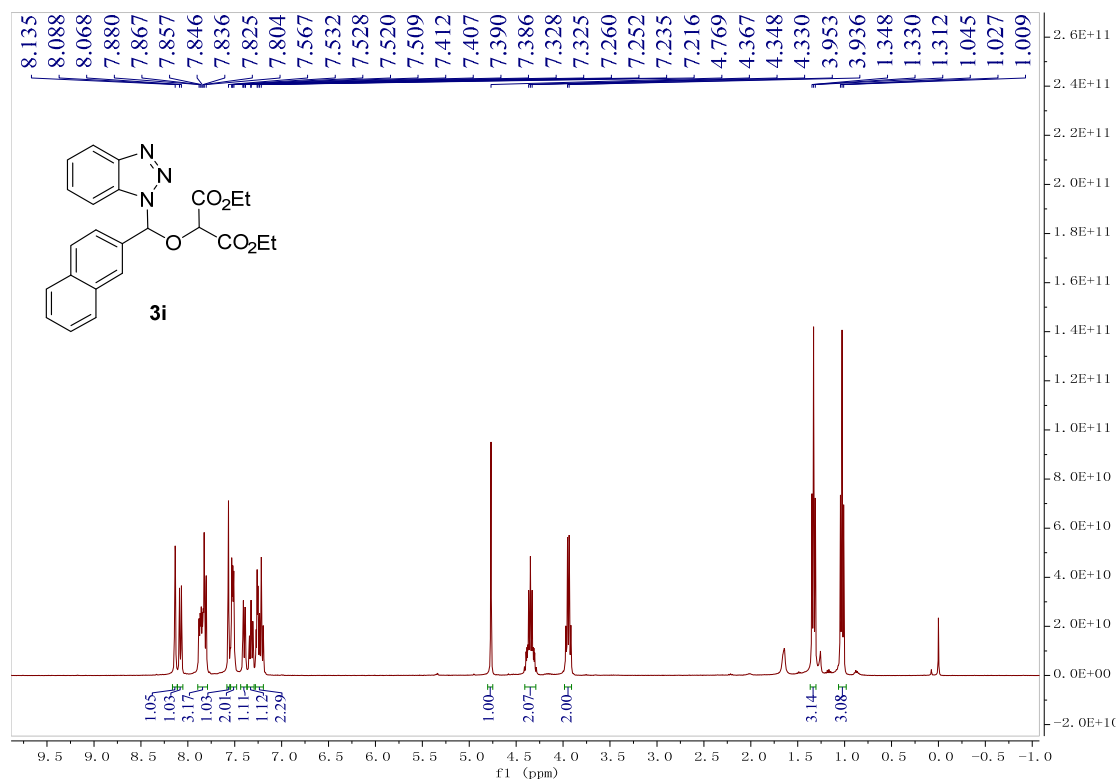

### <sup>13</sup>C NMR (100 MHz, CDCl<sub>3</sub>) for 3i

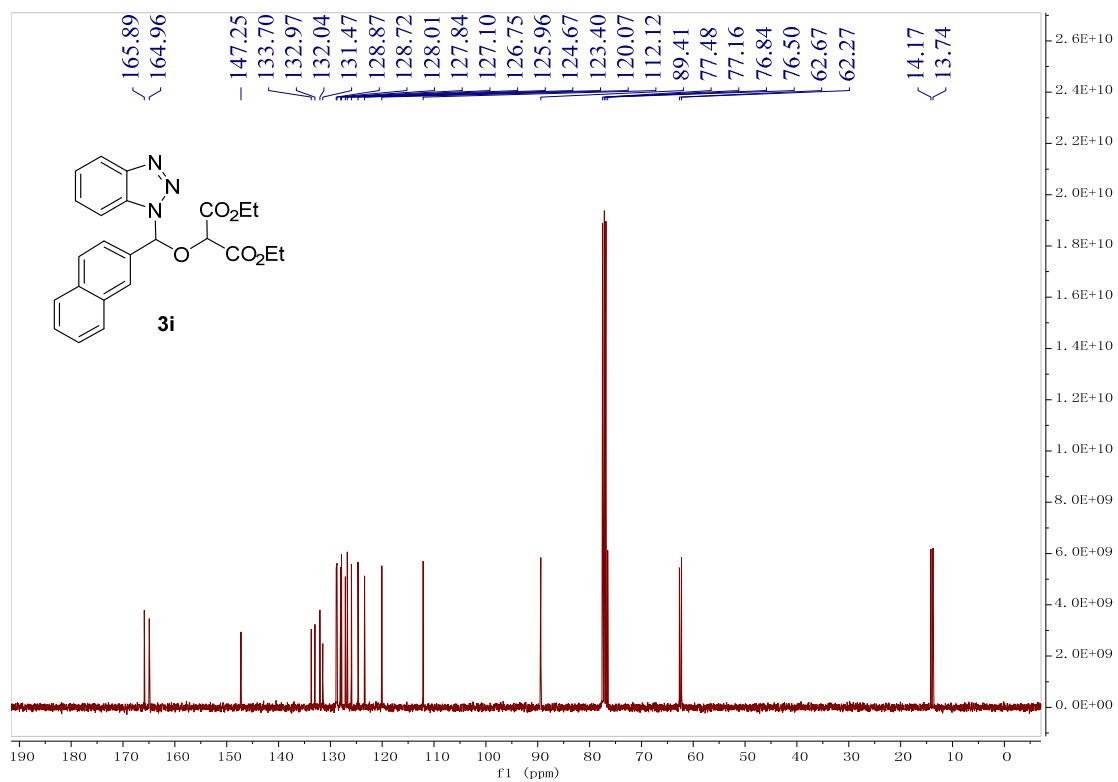



### <sup>1</sup>H NMR (400 MHz, CDCl<sub>3</sub>) for 3j

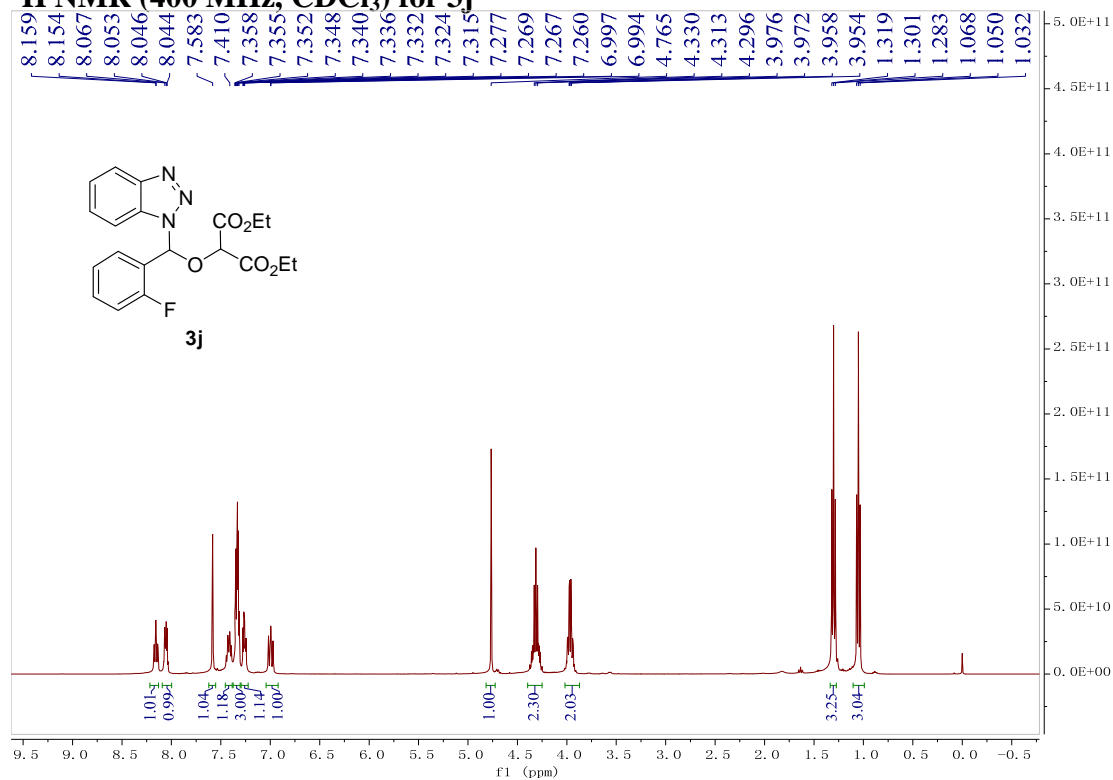

### <sup>13</sup>C NMR (100 MHz, CDCl<sub>3</sub>) for 3j

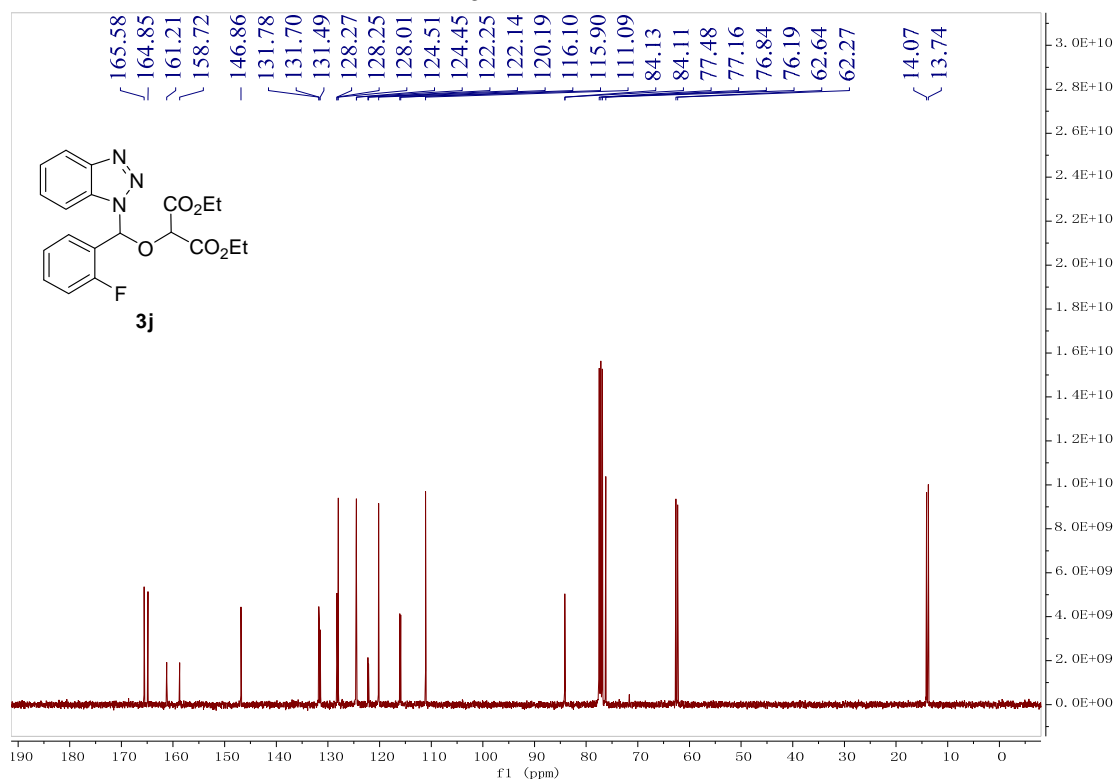

**<sup>19</sup>F NMR (376 MHz, CDCl<sub>3</sub>) for 3j**

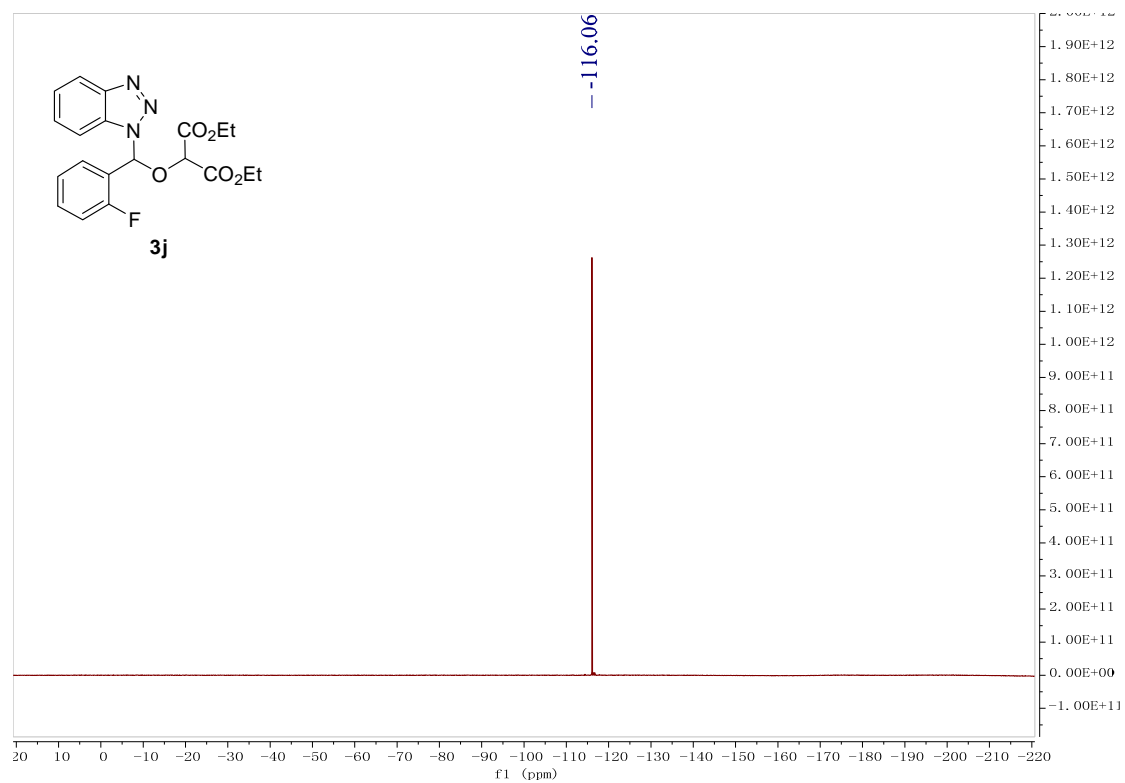

### <sup>1</sup>H NMR (400 MHz, CDCl<sub>3</sub>) for 3k

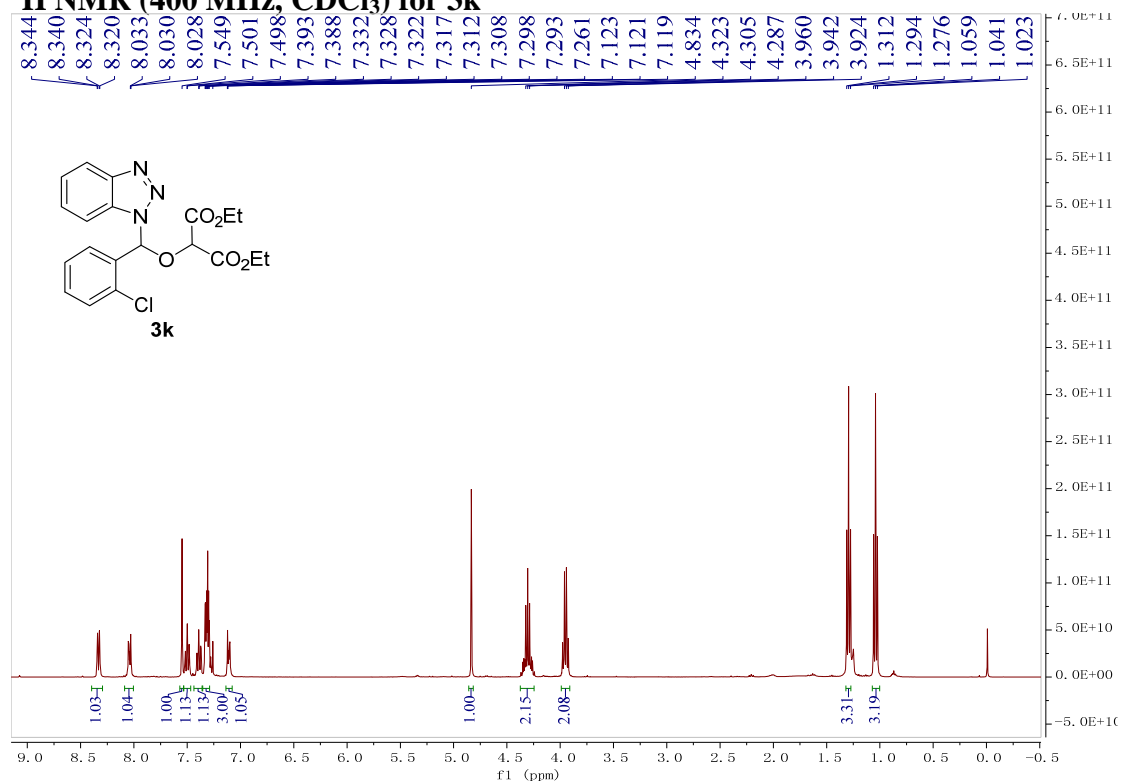

### <sup>13</sup>C NMR (100 MHz, CDCl<sub>3</sub>) for 3k

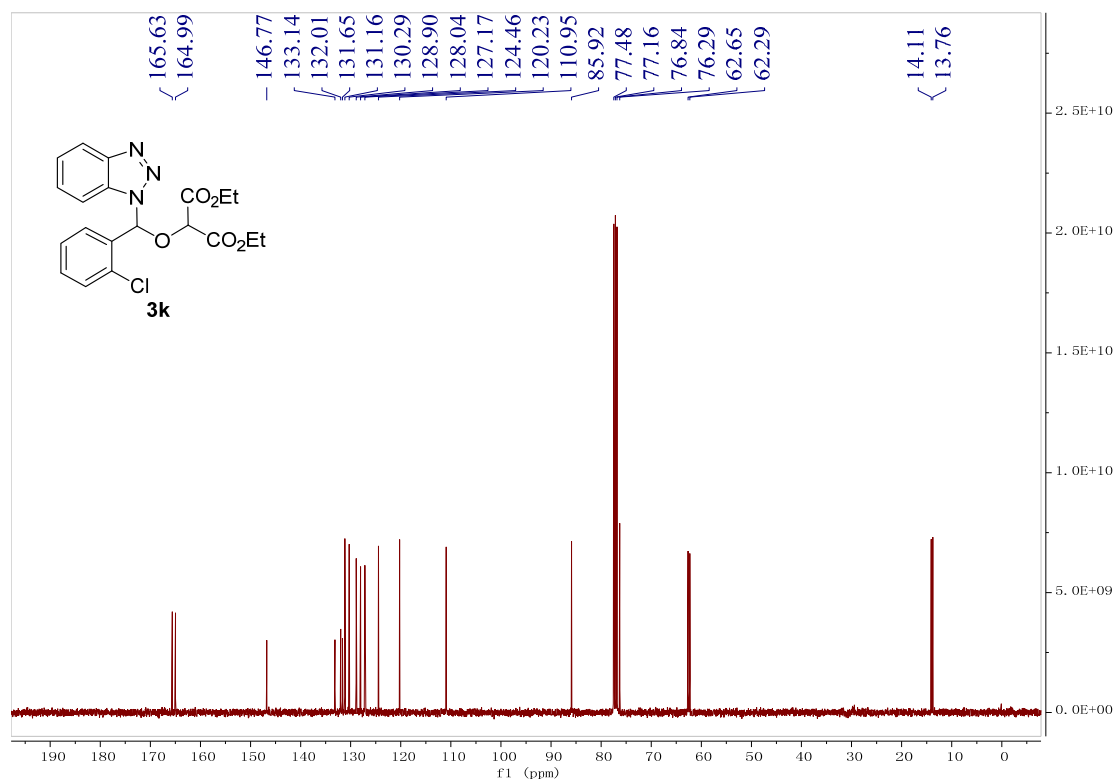

### <sup>1</sup>H NMR (400 MHz, CDCl<sub>3</sub>) for 3I

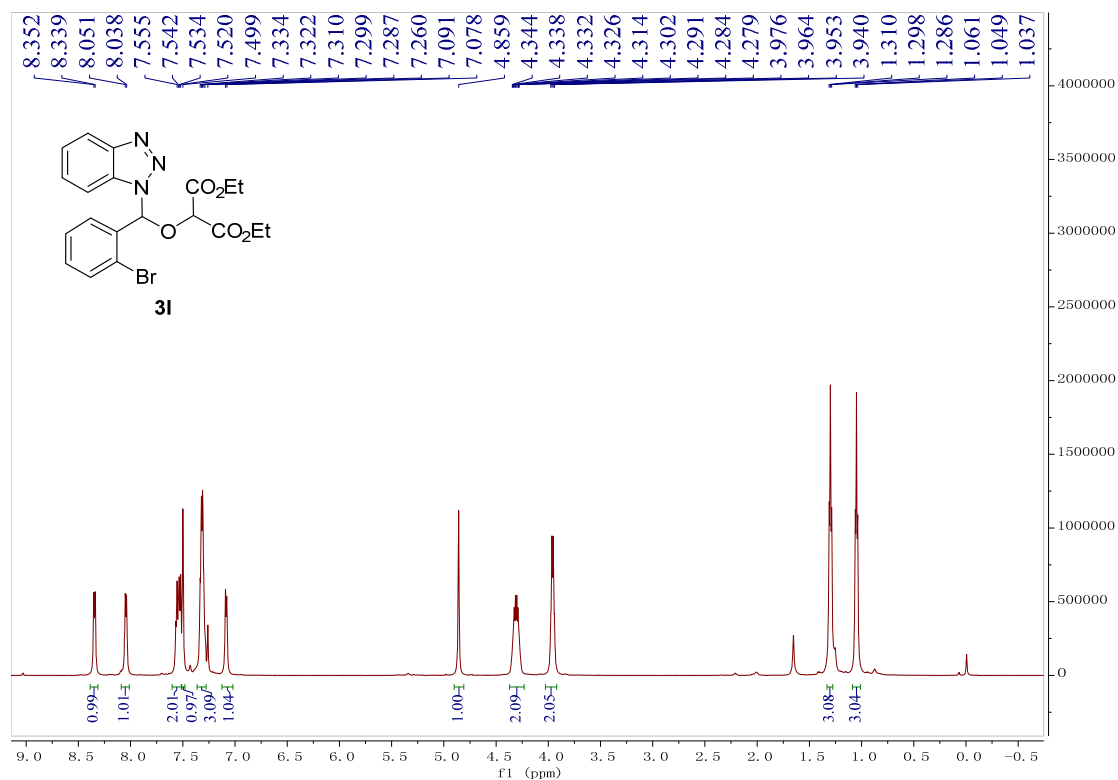

### <sup>13</sup>C NMR (100 MHz, CDCl<sub>3</sub>) for 3I

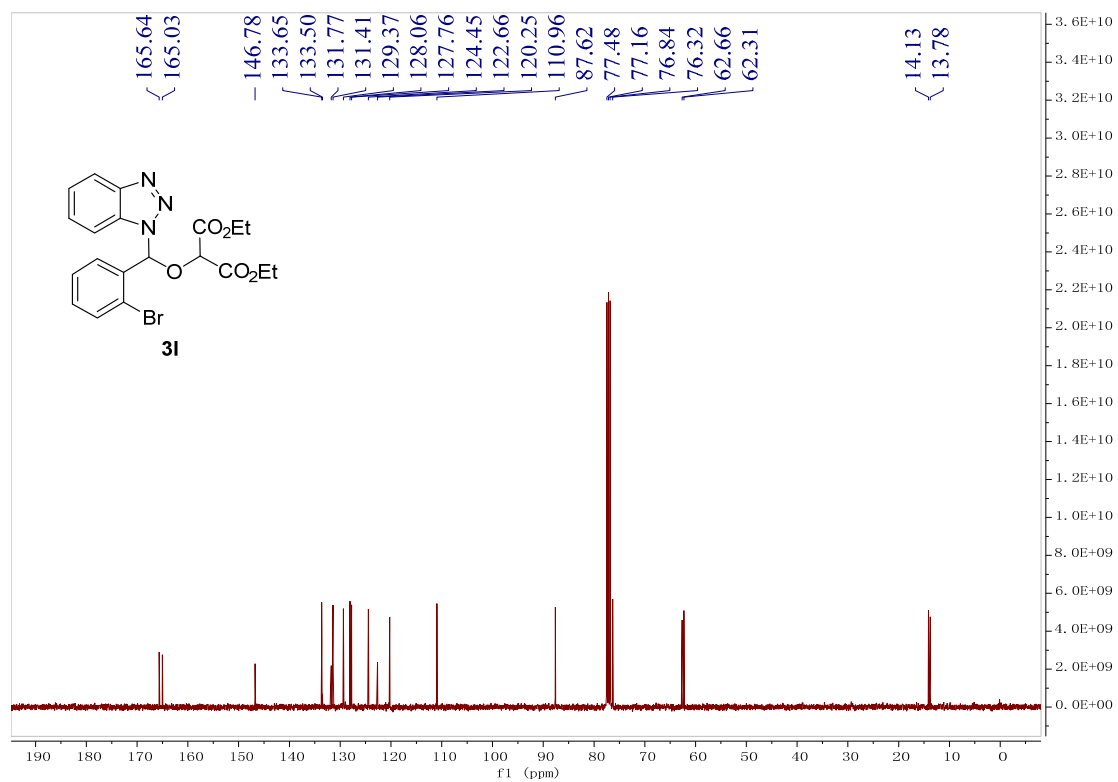

### <sup>1</sup>H NMR (400 MHz, CDCl<sub>3</sub>) for 3m

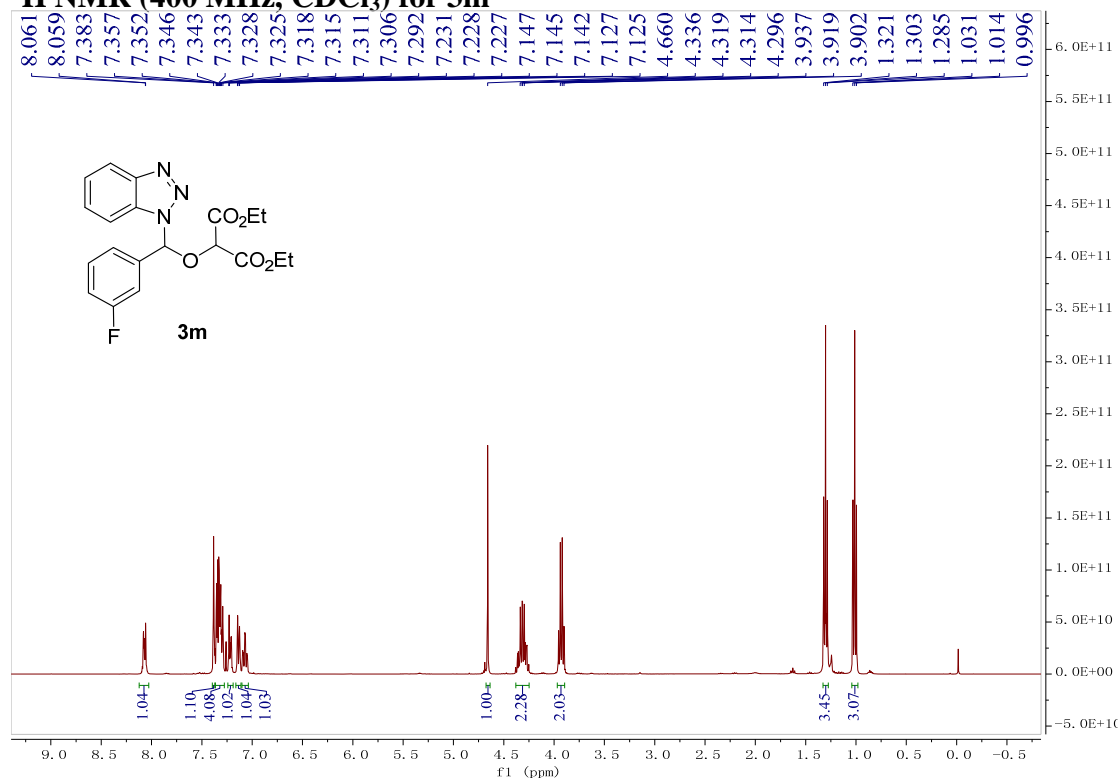

### <sup>13</sup>C NMR (100 MHz, CDCl<sub>3</sub>) for 3m

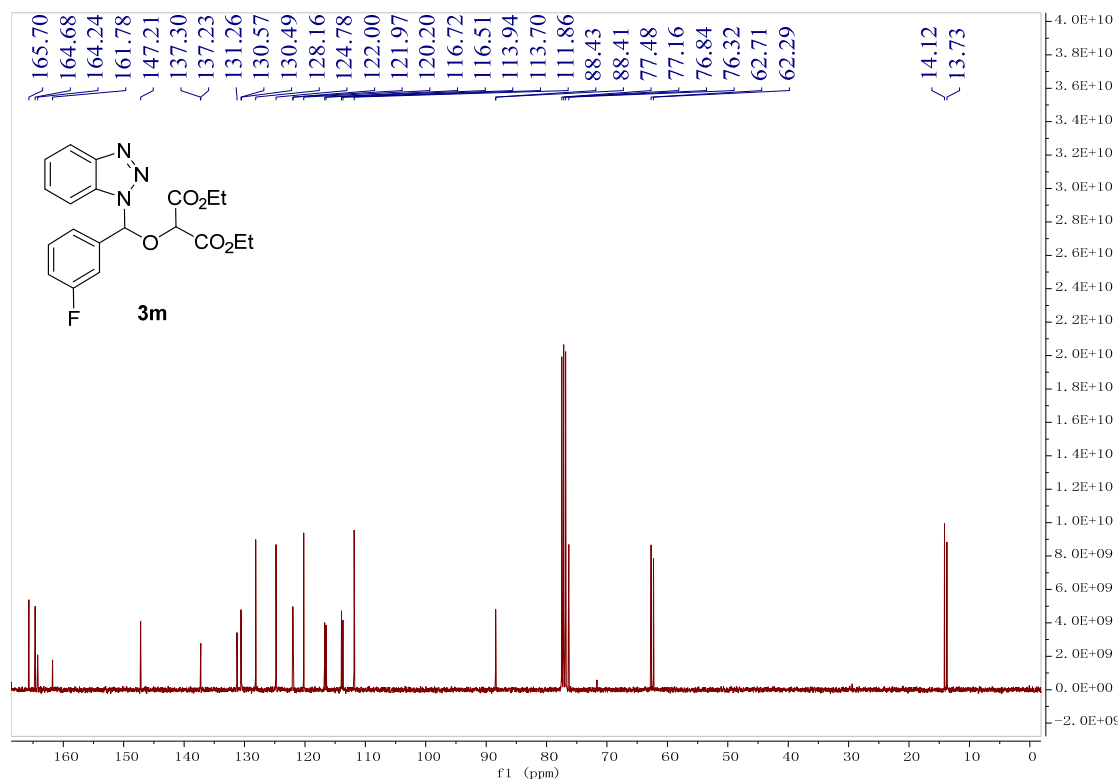

**<sup>19</sup>F NMR (376 MHz, CDCl<sub>3</sub>) for 3m**

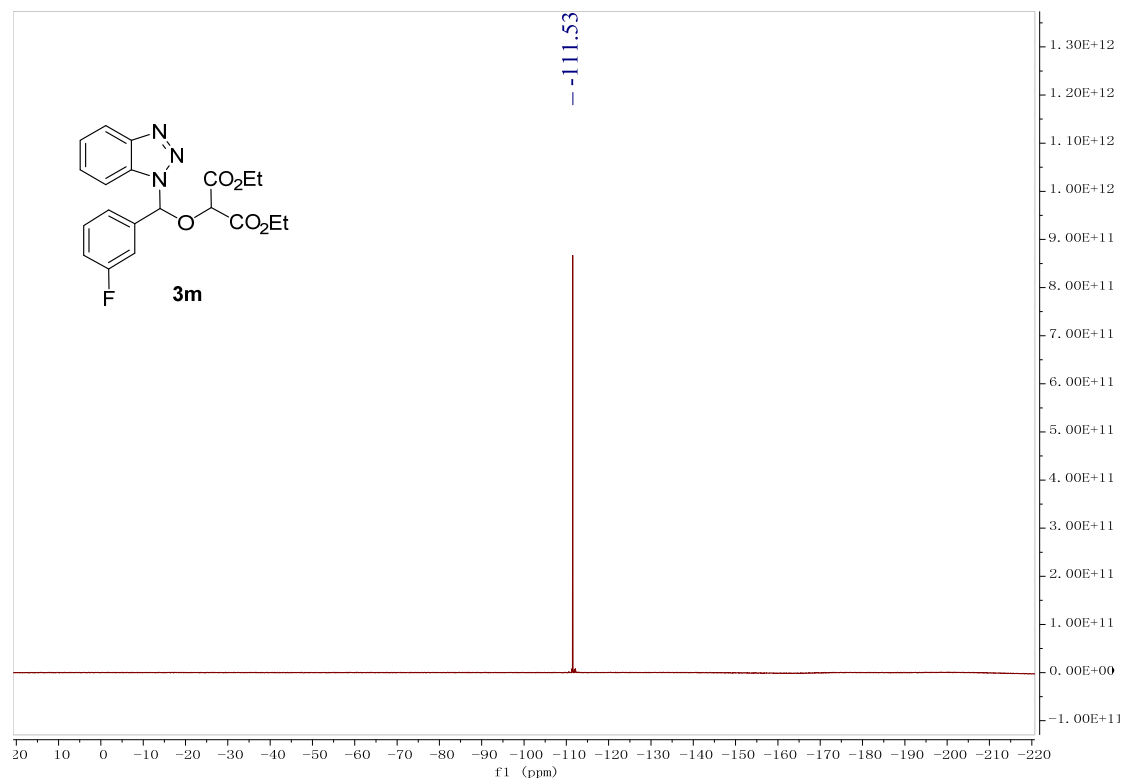

### <sup>1</sup>H NMR (400 MHz, CDCl<sub>3</sub>) for 3n

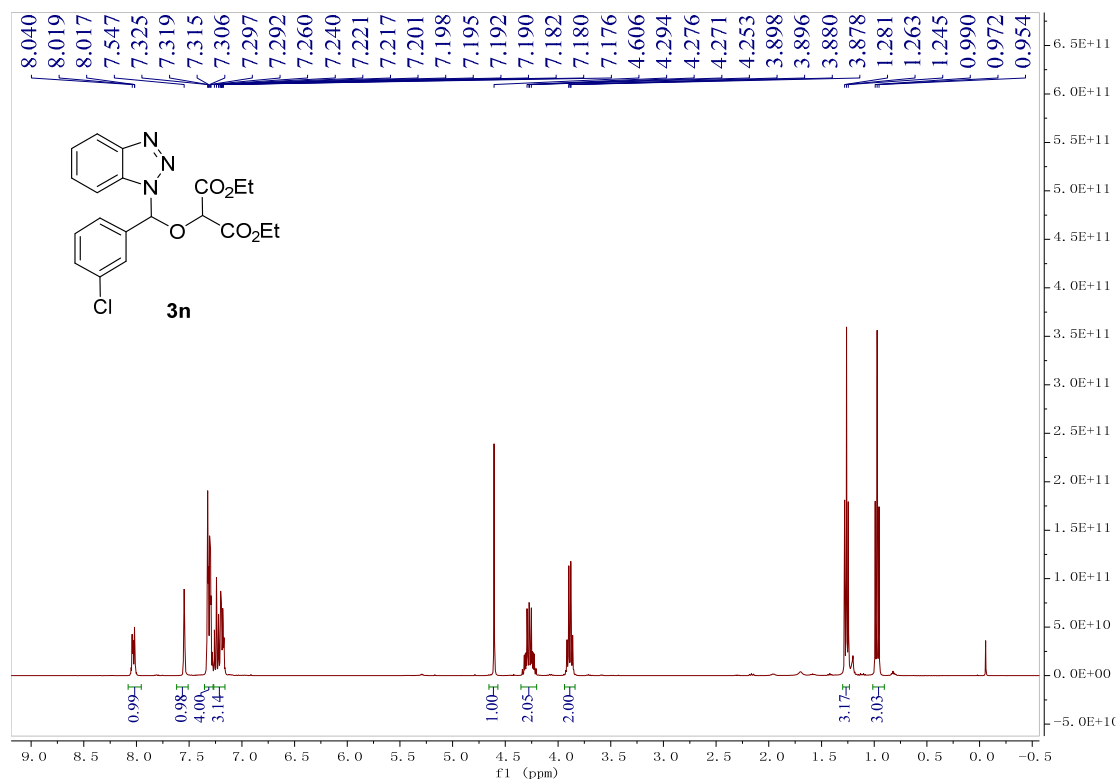

### <sup>13</sup>C NMR (100 MHz, CDCl<sub>3</sub>) for 3n

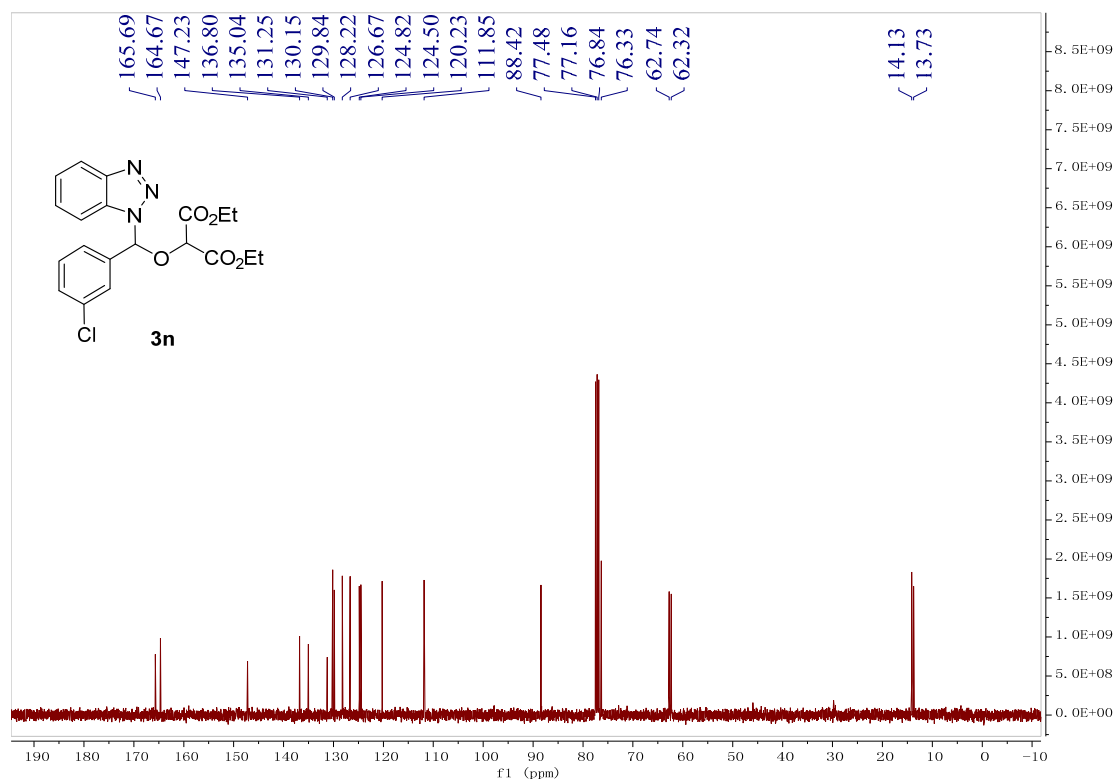

**<sup>1</sup>H NMR (400 MHz, CDCl<sub>3</sub>) for 3o**

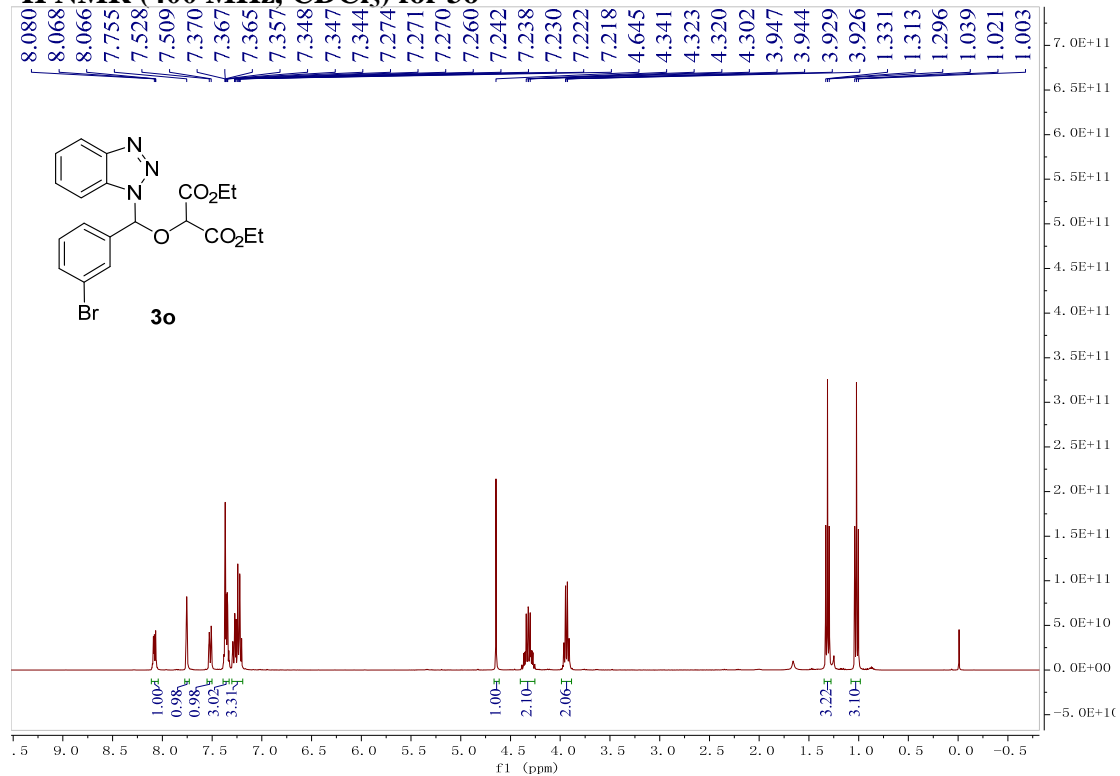

**<sup>13</sup>C NMR (100 MHz, CDCl<sub>3</sub>) for 3o**

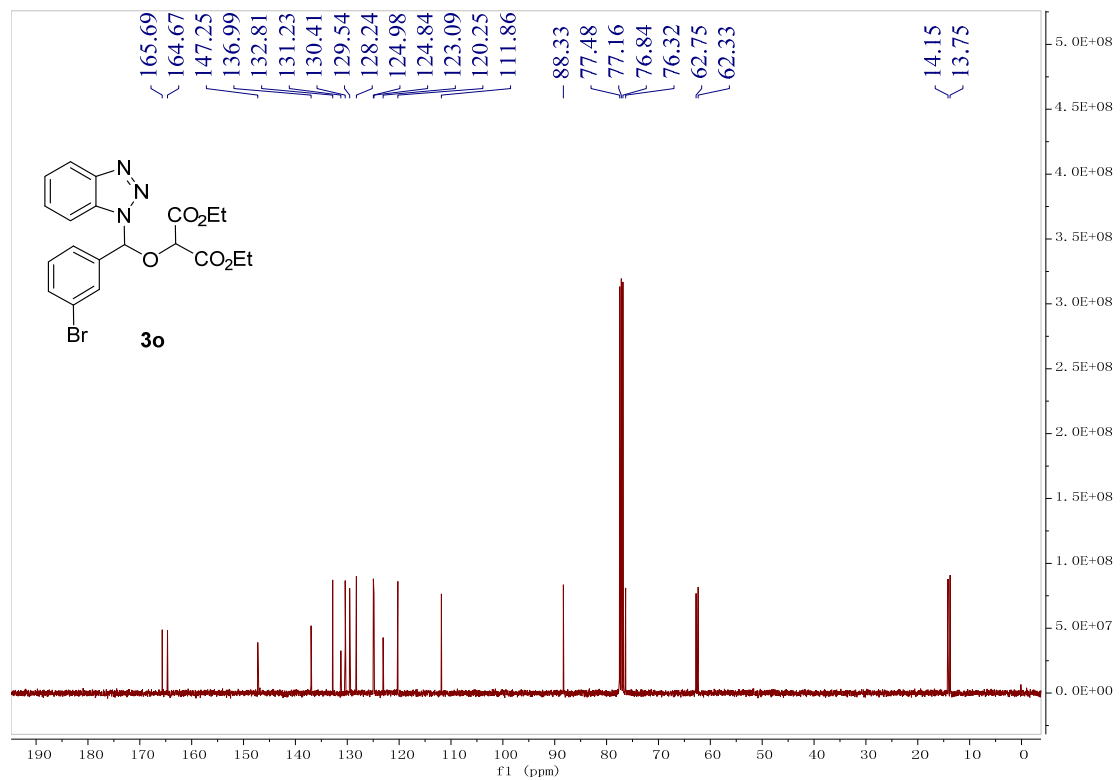



### <sup>1</sup>H NMR (600 MHz, CDCl<sub>3</sub>) for 3p

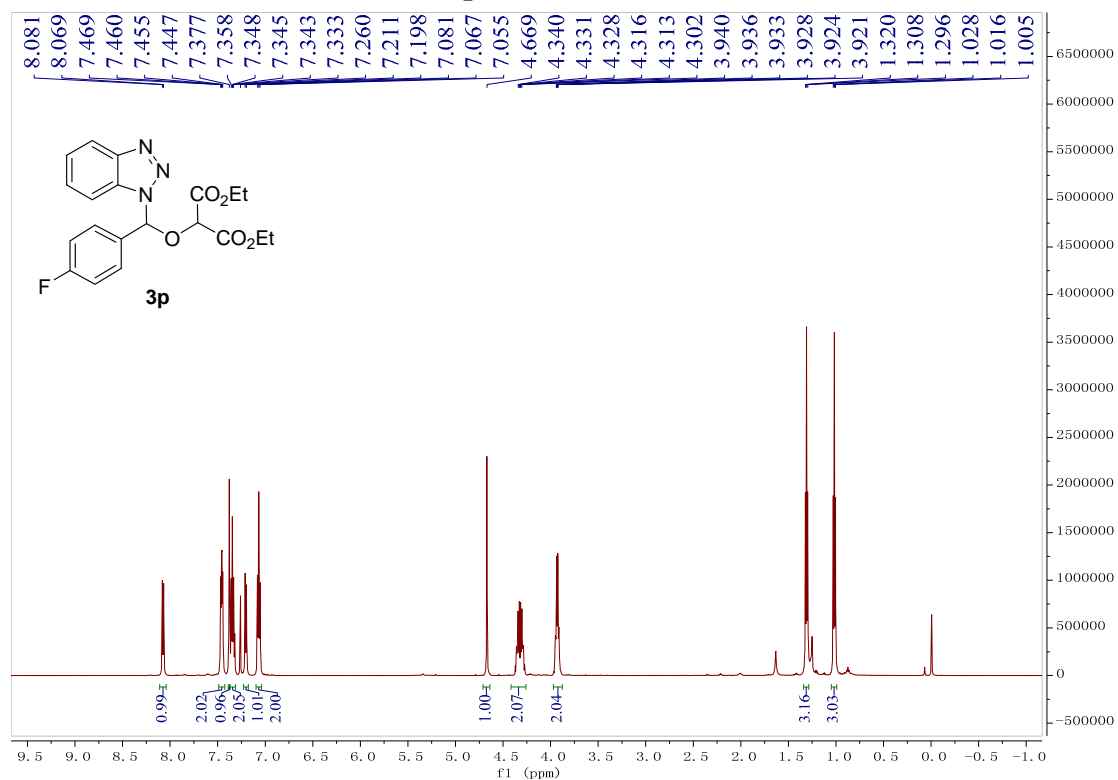

### <sup>13</sup>C NMR (150 MHz, CDCl<sub>3</sub>) for 3p

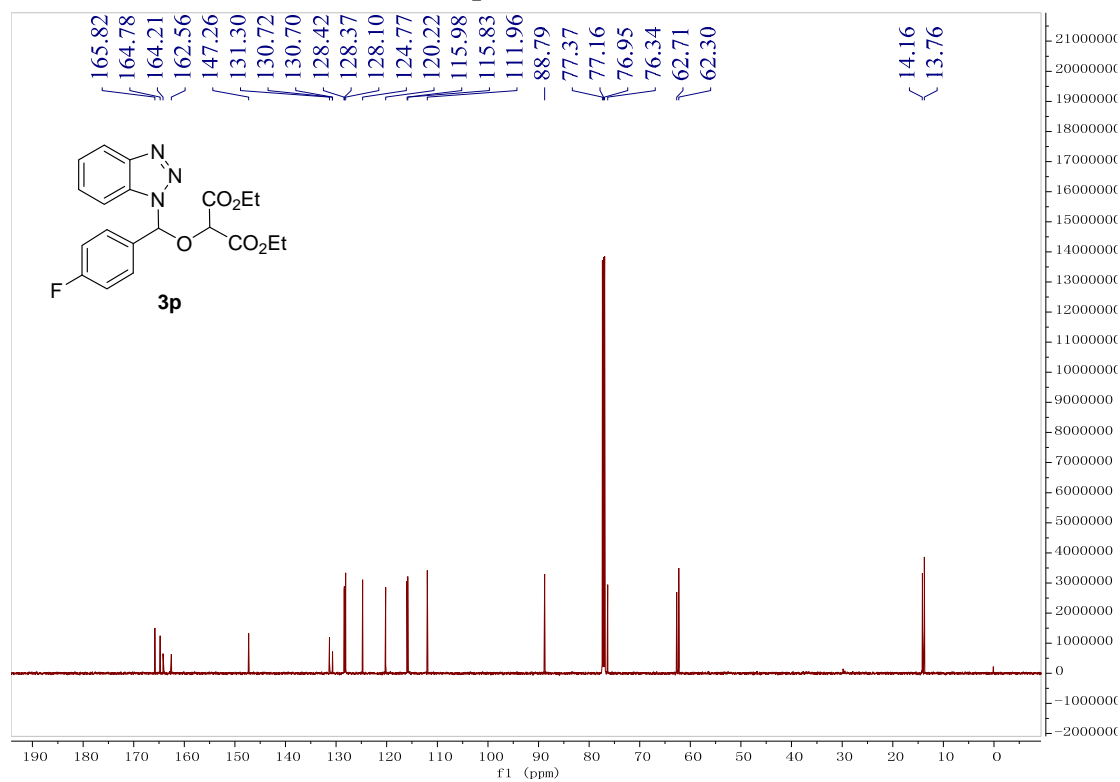

**<sup>19</sup>F NMR (376 MHz, CDCl<sub>3</sub>) for 3p**

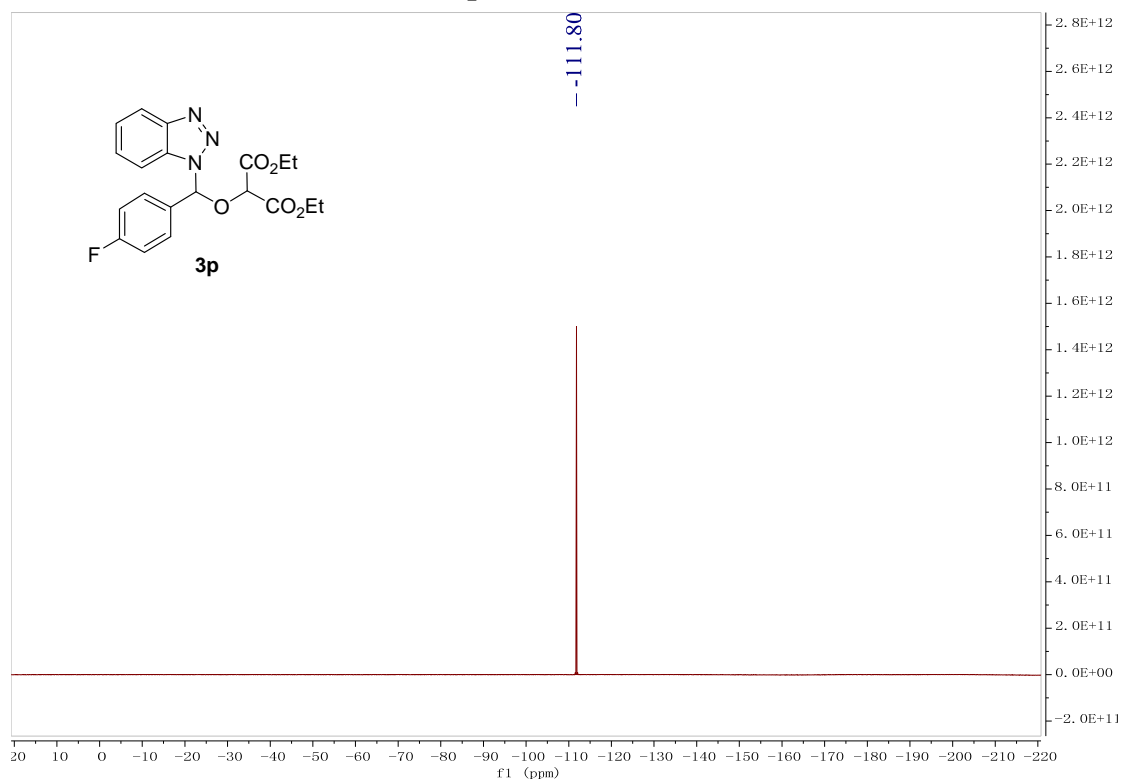

### <sup>1</sup>H NMR (400 MHz, CDCl<sub>3</sub>) for 3q

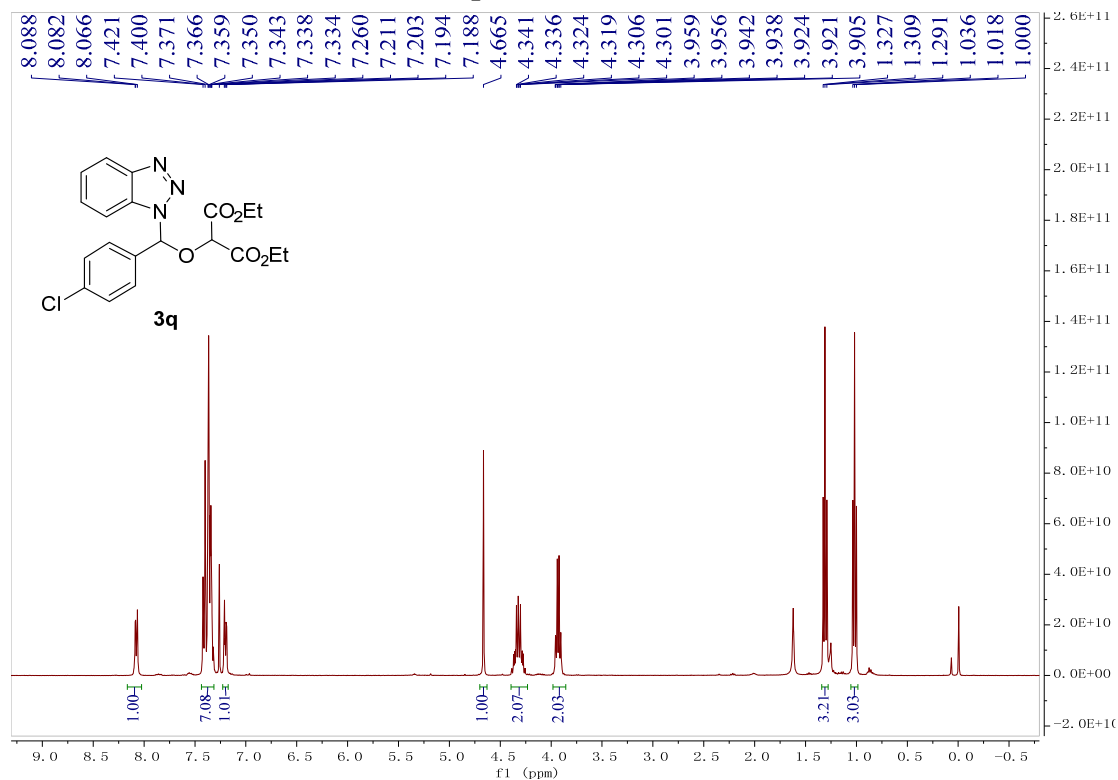

### <sup>13</sup>C NMR (100 MHz, CDCl<sub>3</sub>) for 3q

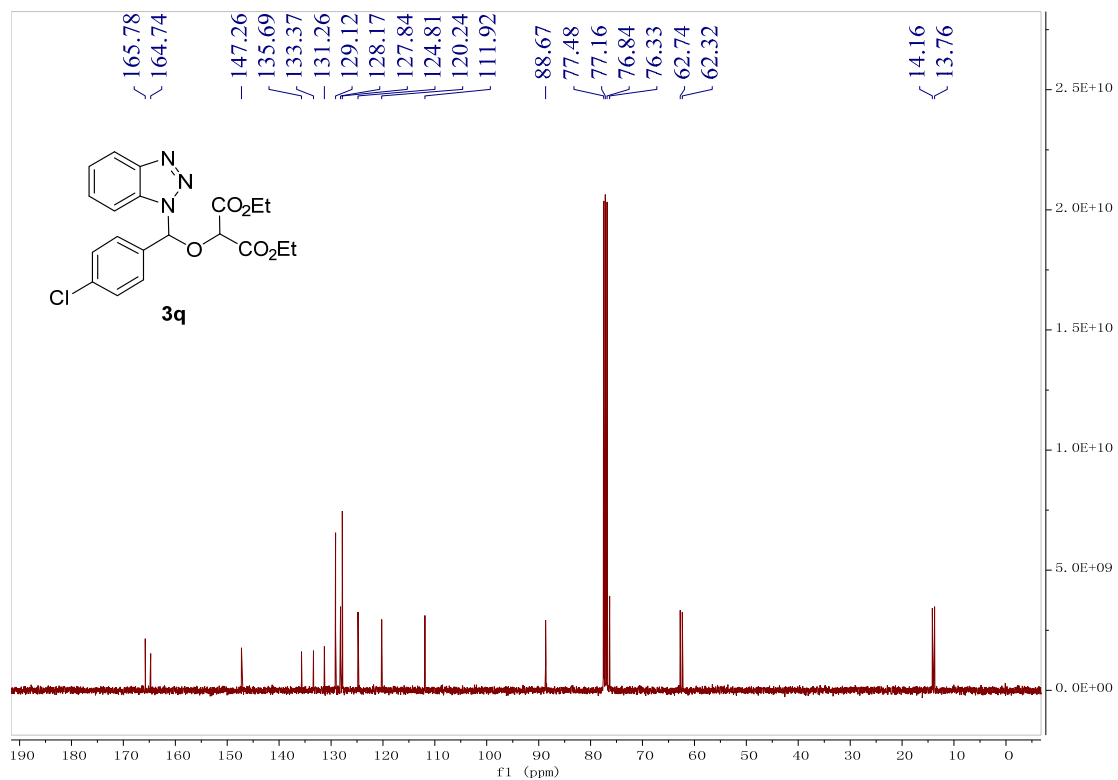

**<sup>1</sup>H NMR (400 MHz, CDCl<sub>3</sub>) for 3r**

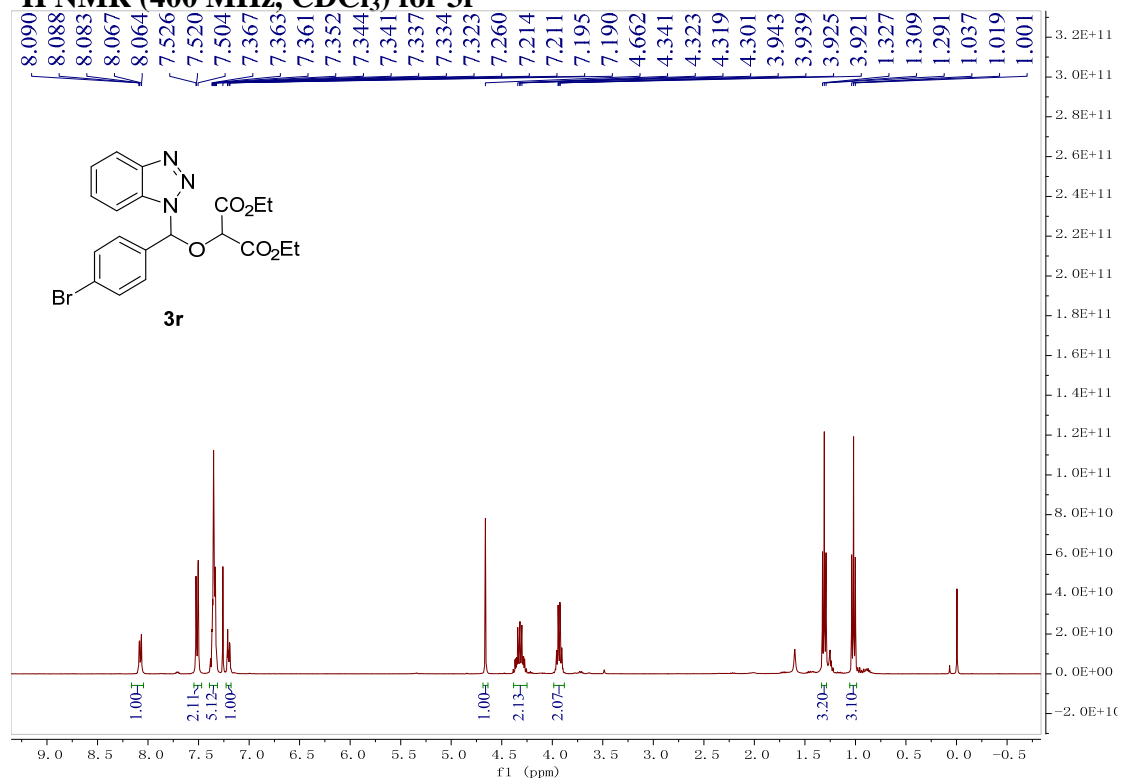

**<sup>13</sup>C NMR (100 MHz, CDCl<sub>3</sub>) for 3r**

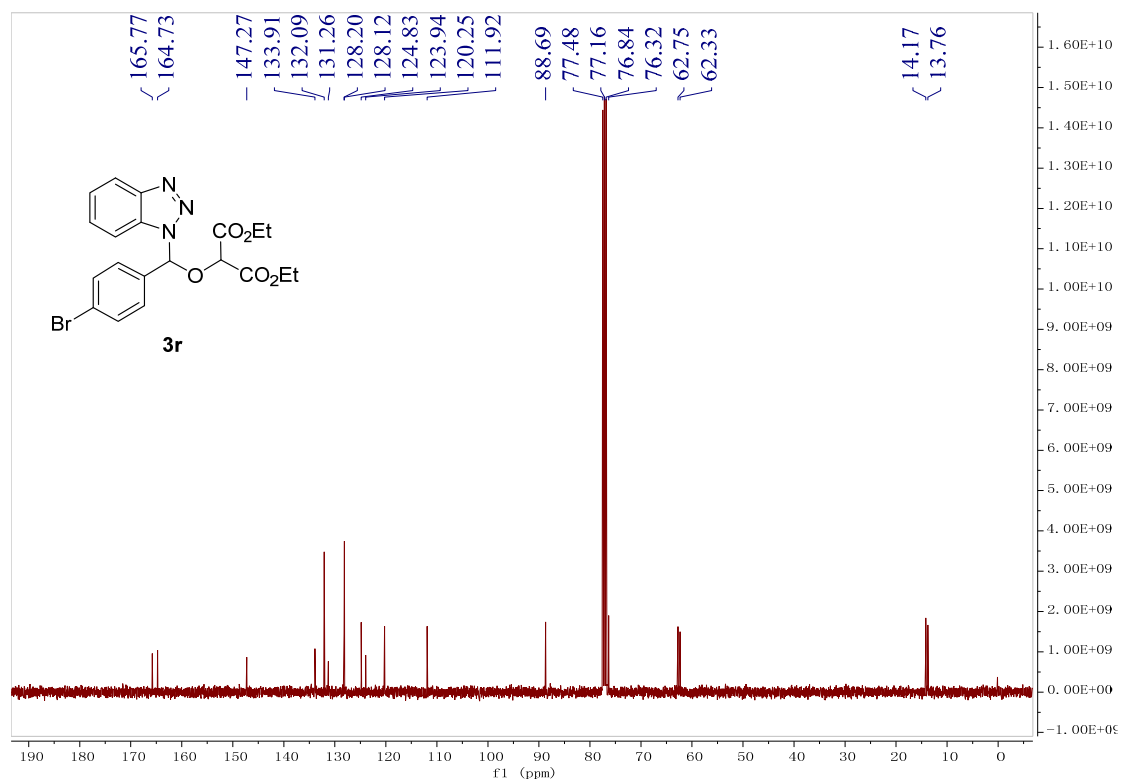

### <sup>1</sup>H NMR (400 MHz, CDCl<sub>3</sub>) for 3s

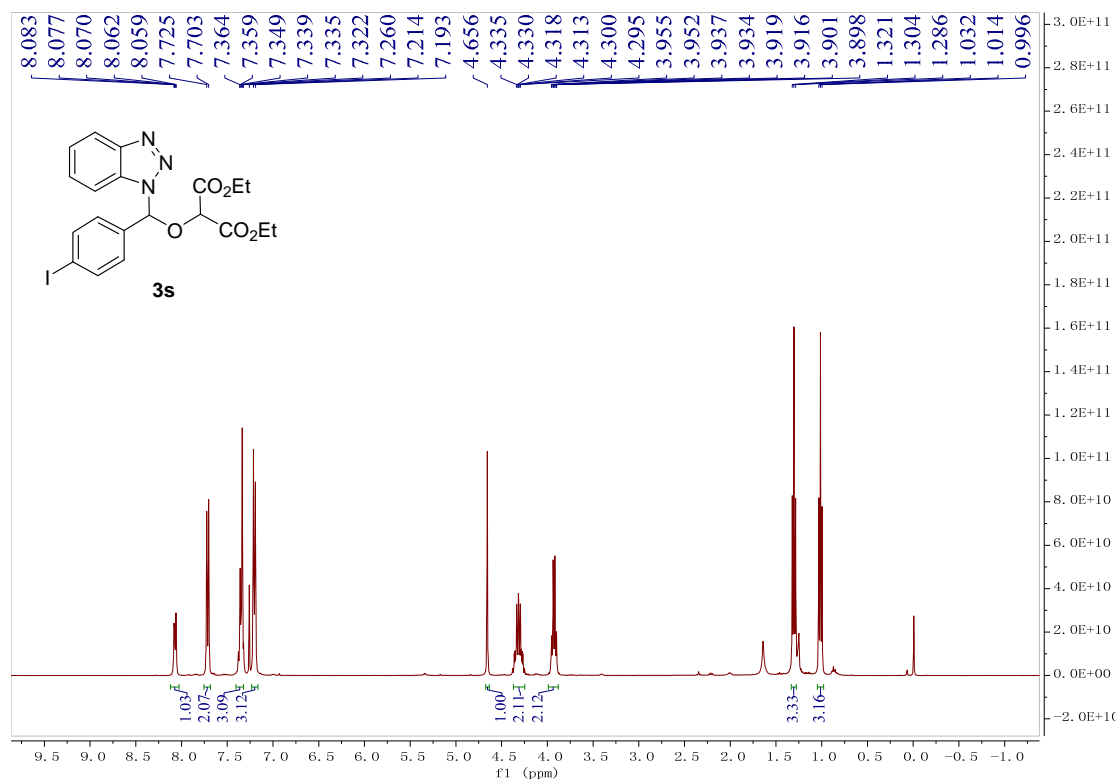

### <sup>13</sup>C NMR (100 MHz, CDCl<sub>3</sub>) for 3s

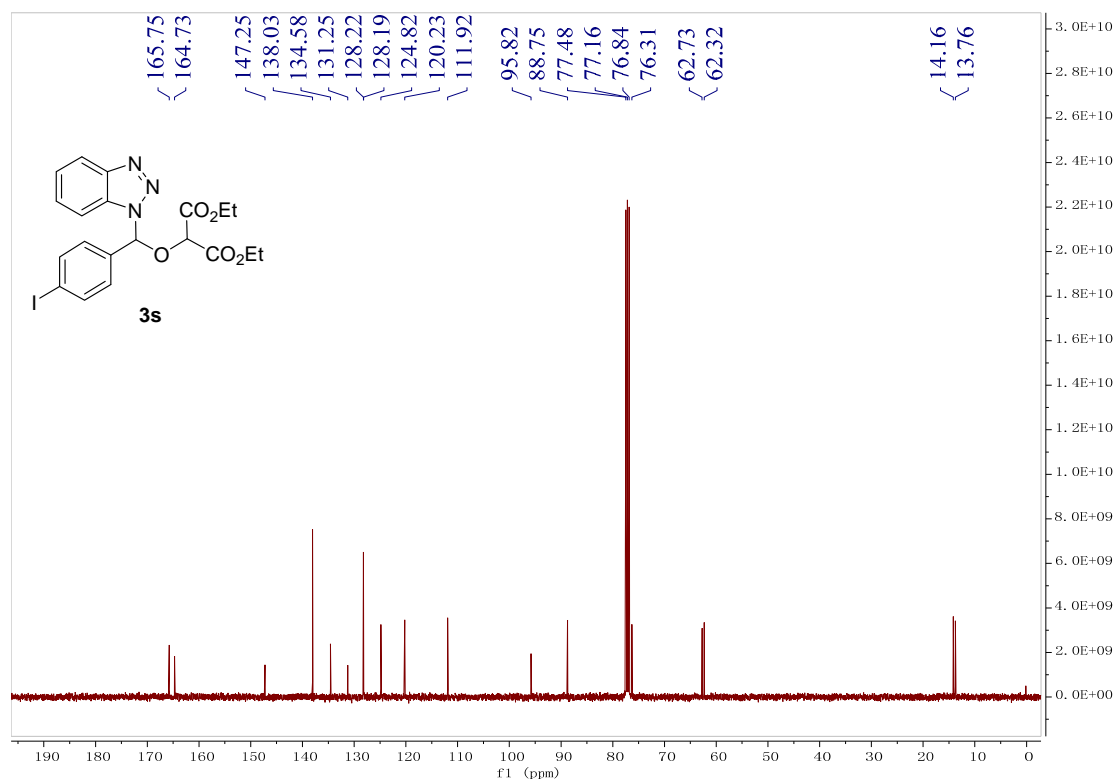

### <sup>1</sup>H NMR (400 MHz, CDCl<sub>3</sub>) for 3t

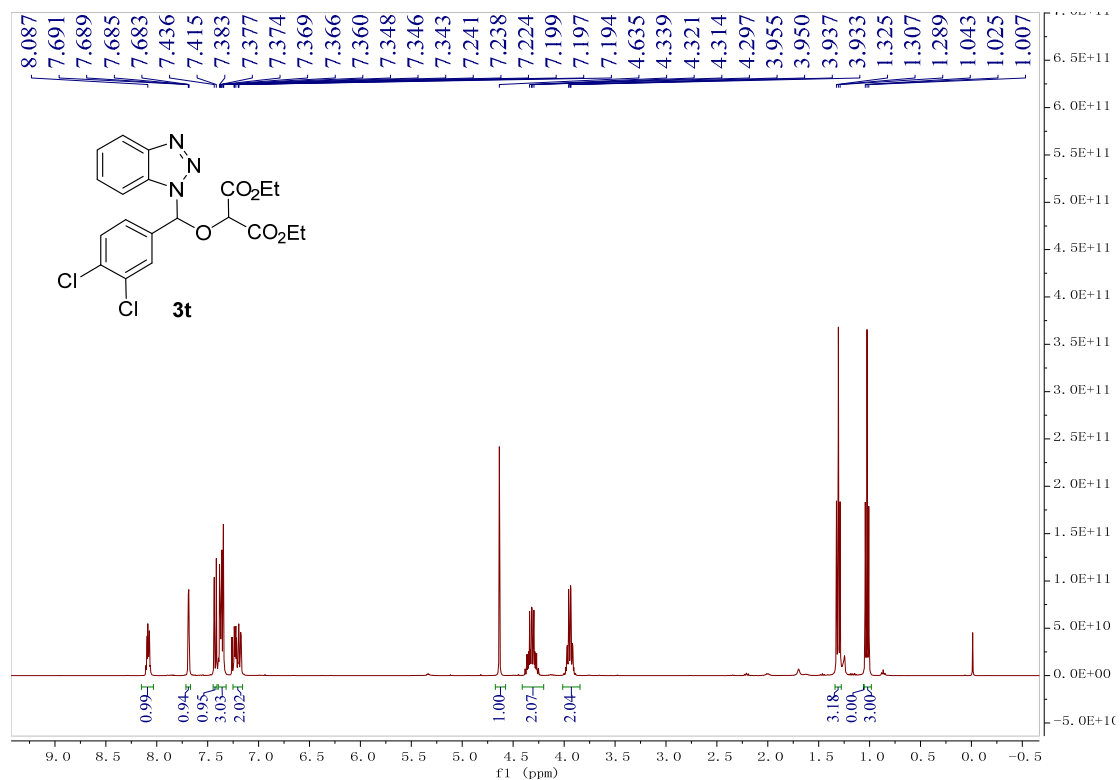

### <sup>13</sup>C NMR (100 MHz, CDCl<sub>3</sub>) for 3t

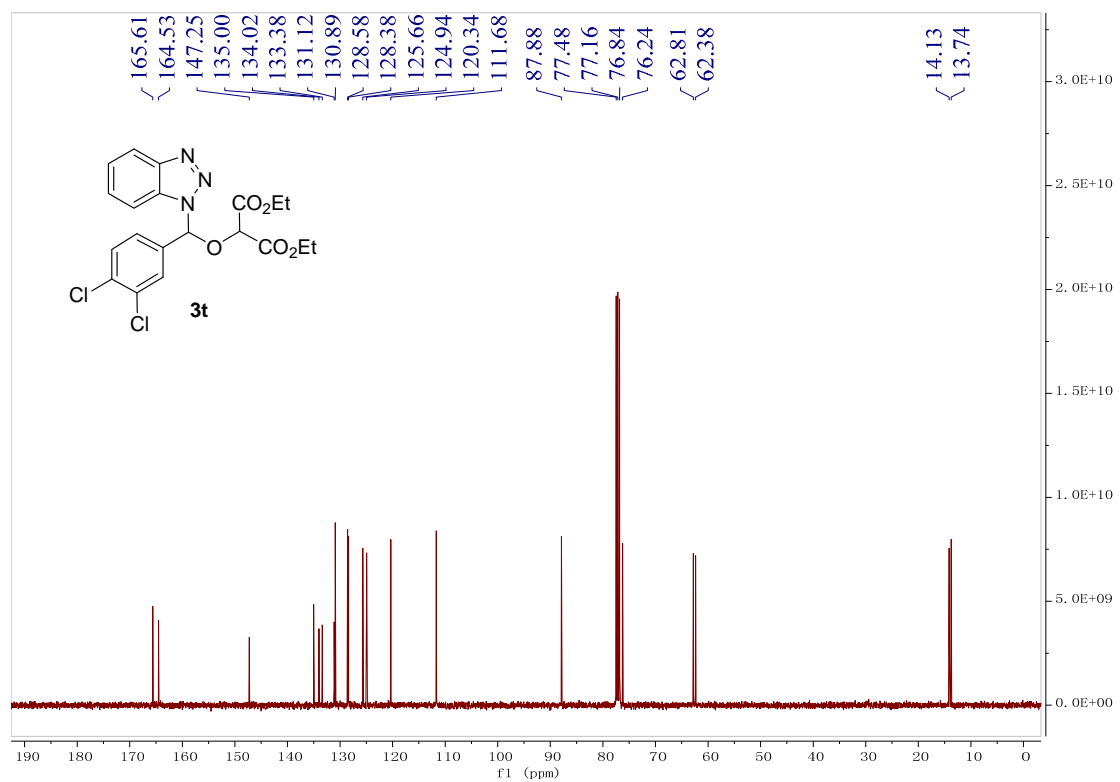

### <sup>1</sup>H NMR (400 MHz, CDCl<sub>3</sub>) for 3u

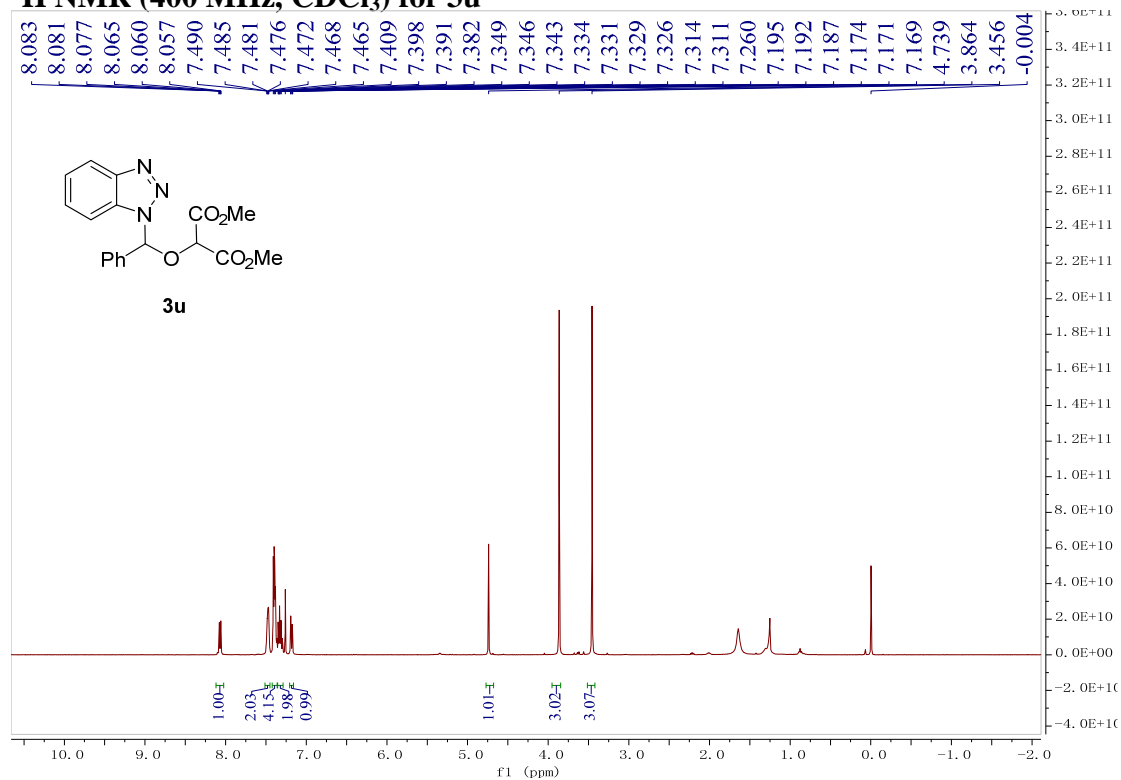

### <sup>13</sup>C NMR (100 MHz, CDCl<sub>3</sub>) for 3u

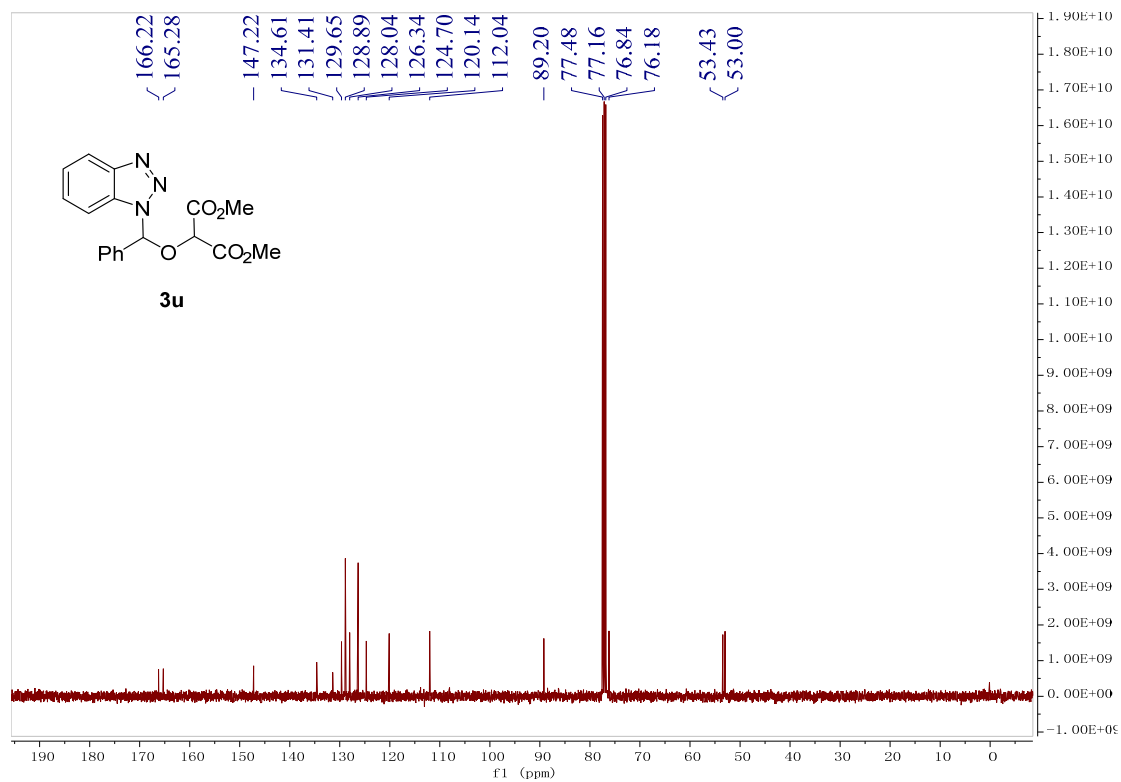

**<sup>1</sup>H NMR (400 MHz, CDCl<sub>3</sub>) for 3v**

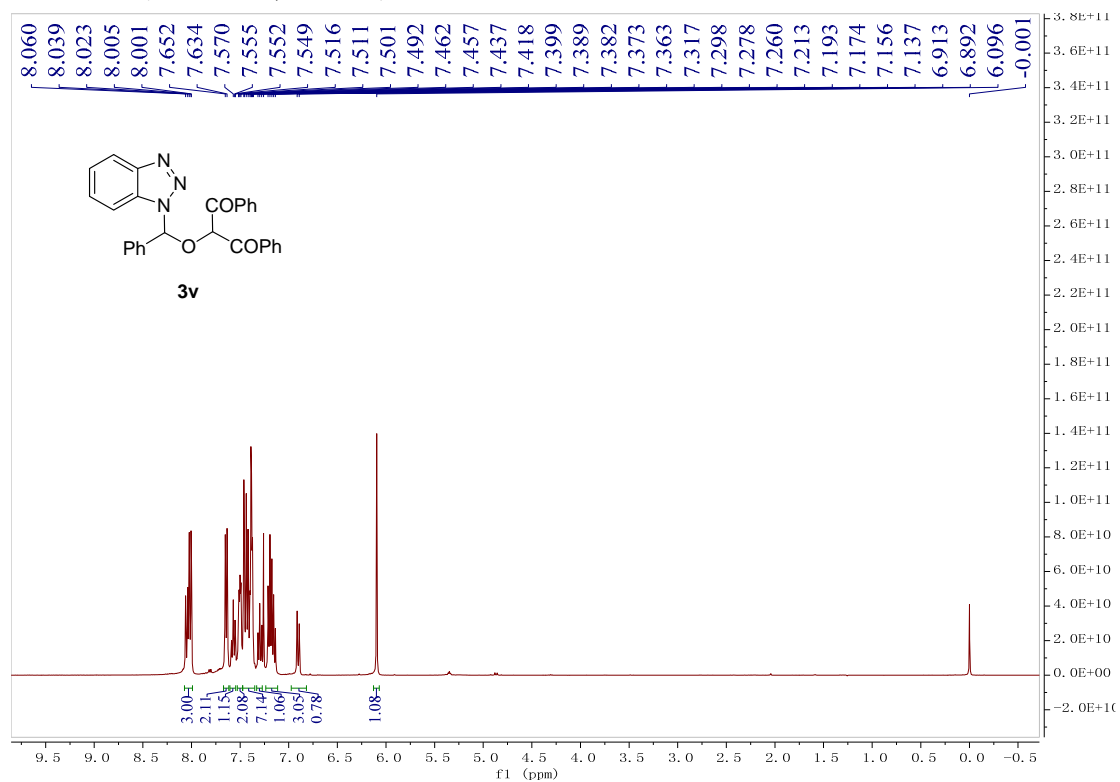

**<sup>13</sup>C NMR (100 MHz, CDCl<sub>3</sub>) for 3v**

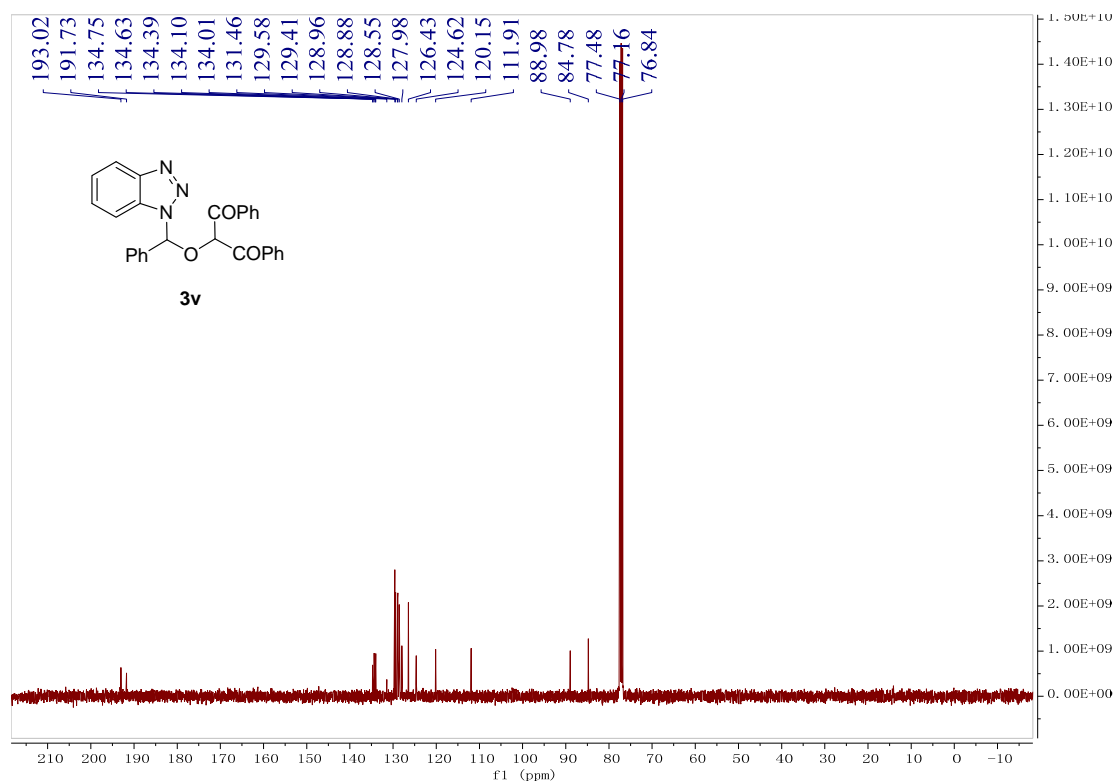



### <sup>1</sup>H NMR (600 MHz, CDCl<sub>3</sub>) for 3w

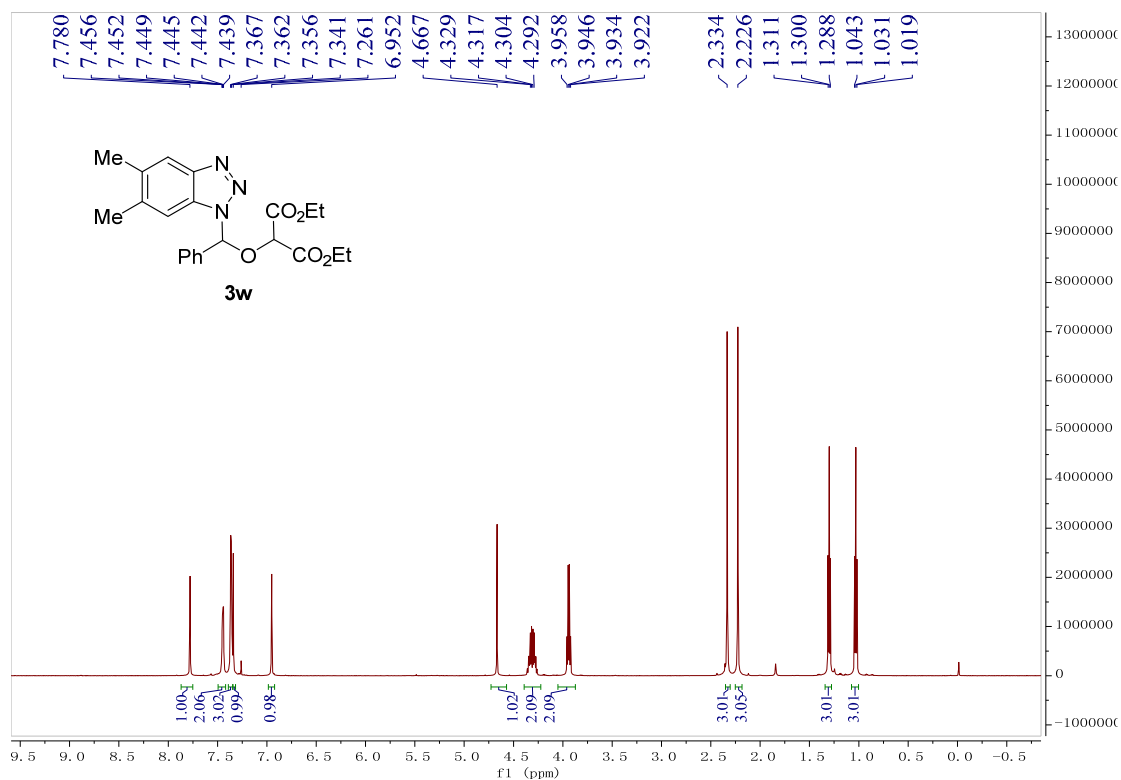

### <sup>13</sup>C NMR (150 MHz, CDCl<sub>3</sub>) for 3w

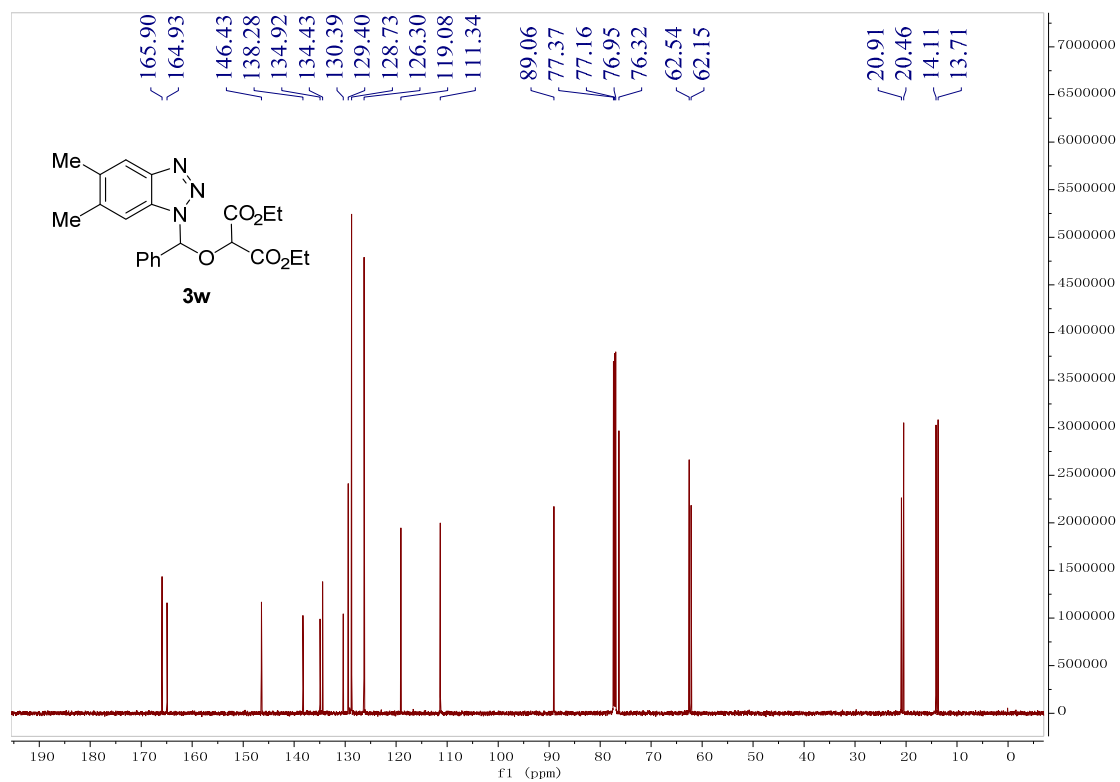

### <sup>1</sup>H NMR (600 MHz, CDCl<sub>3</sub>) for 3x

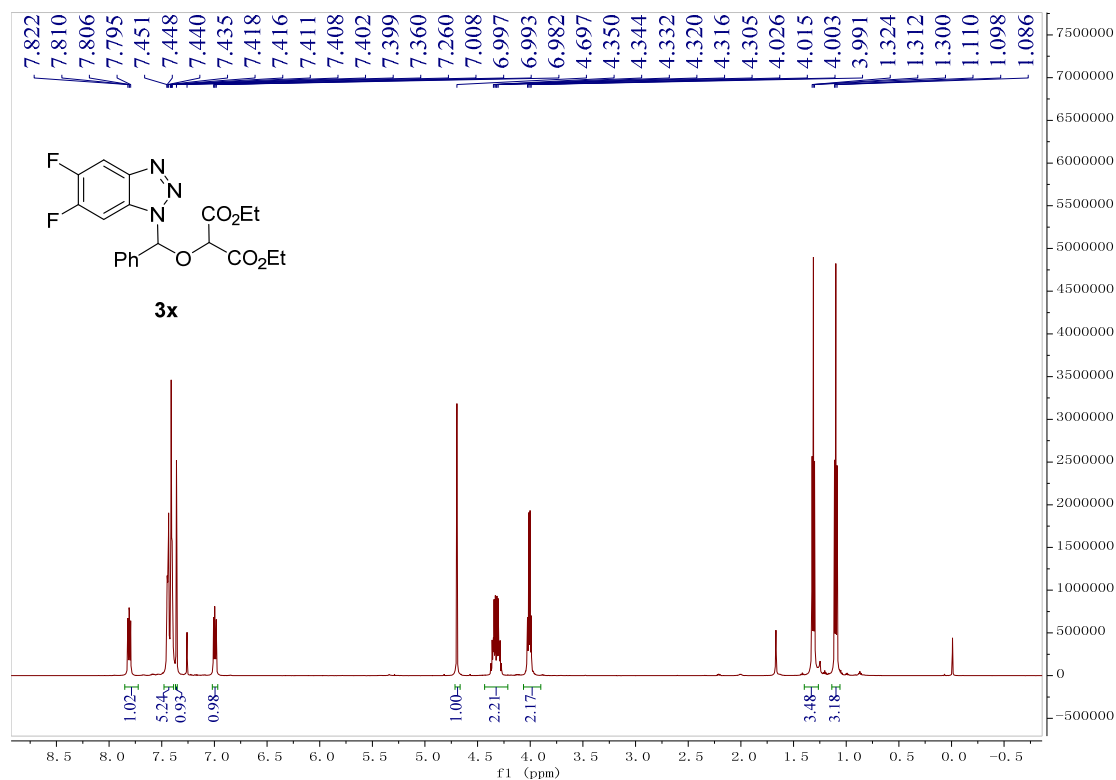

### <sup>13</sup>C NMR (150 MHz, CDCl<sub>3</sub>) for 3x

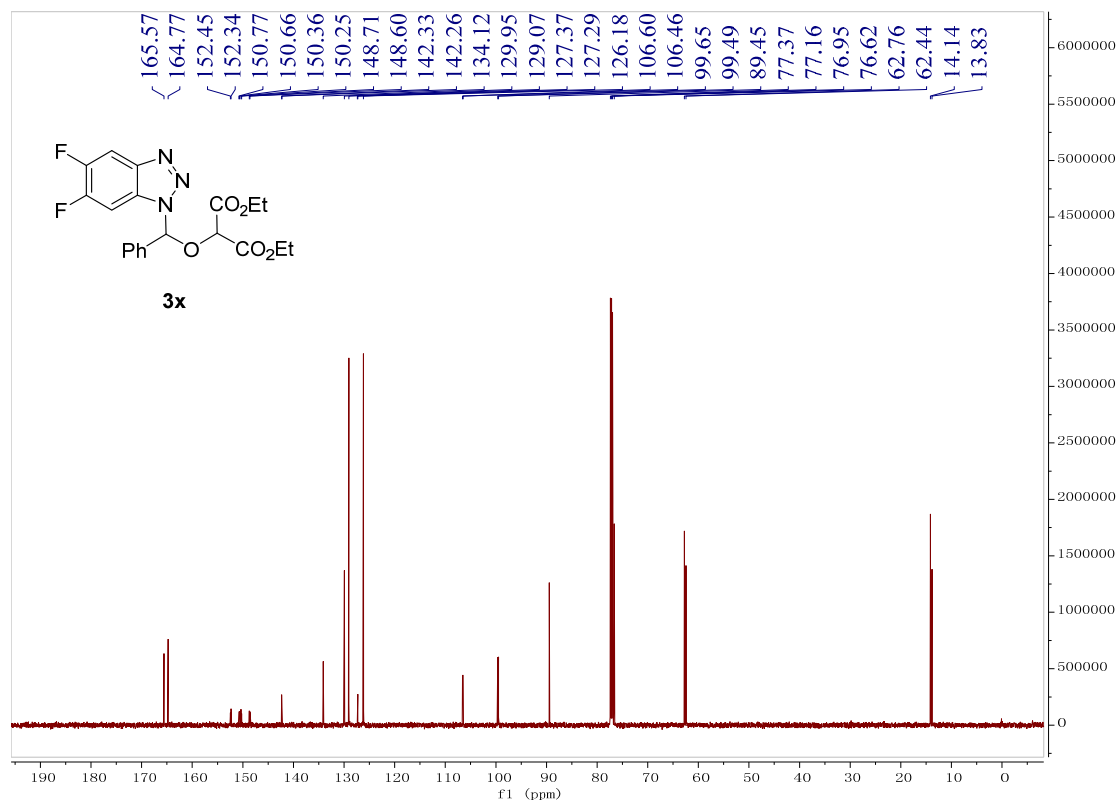

**<sup>19</sup>F NMR (565 MHz, CDCl<sub>3</sub>) for 3x**

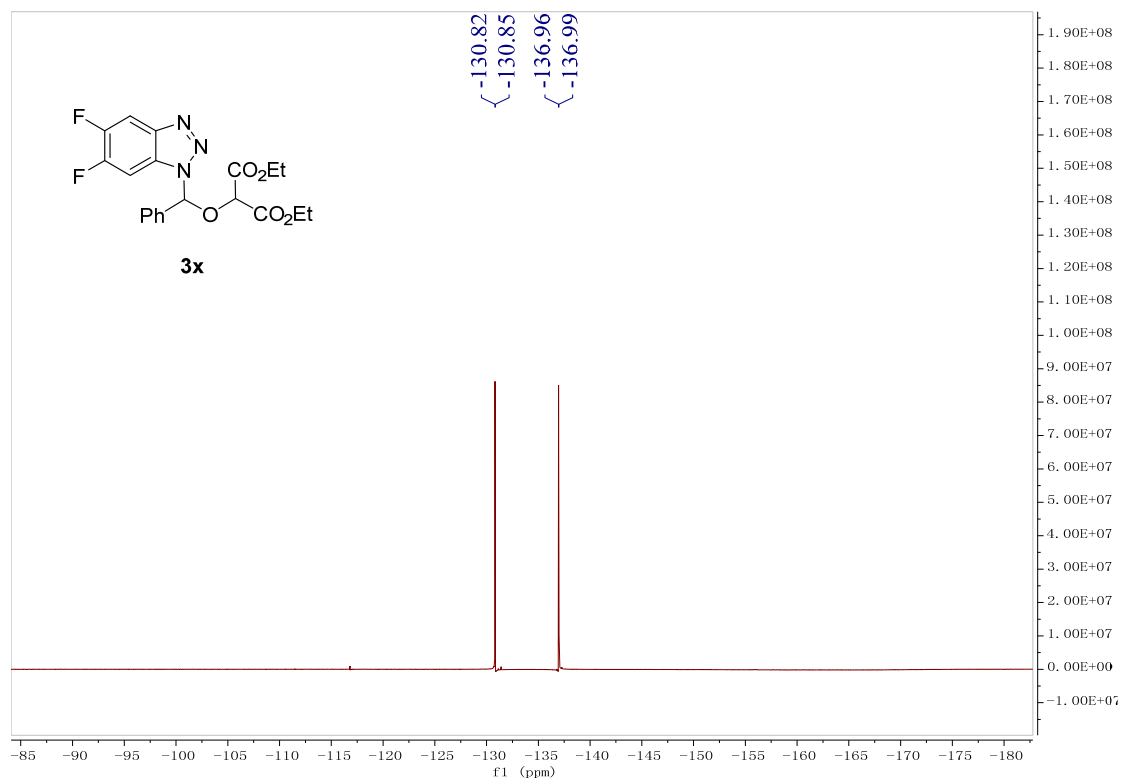

**<sup>1</sup>H NMR (400 MHz, CDCl<sub>3</sub>) for 7a**

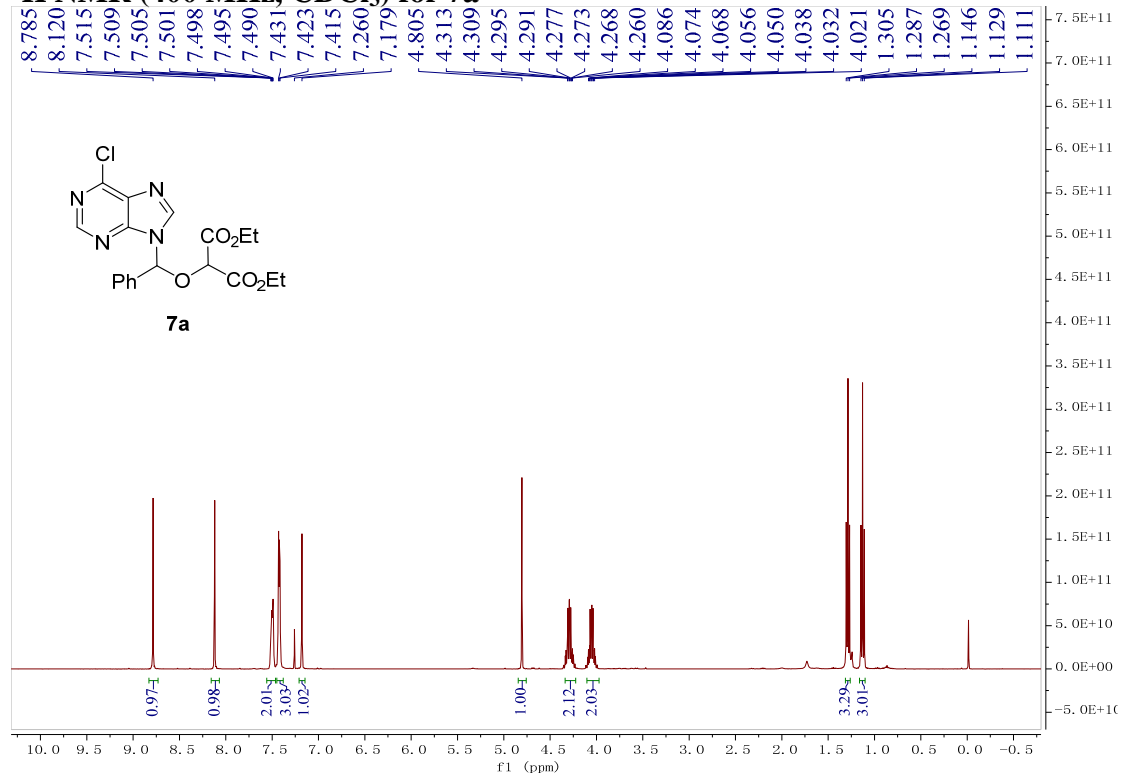

**<sup>13</sup>C NMR (100 MHz, CDCl<sub>3</sub>) for 7a**

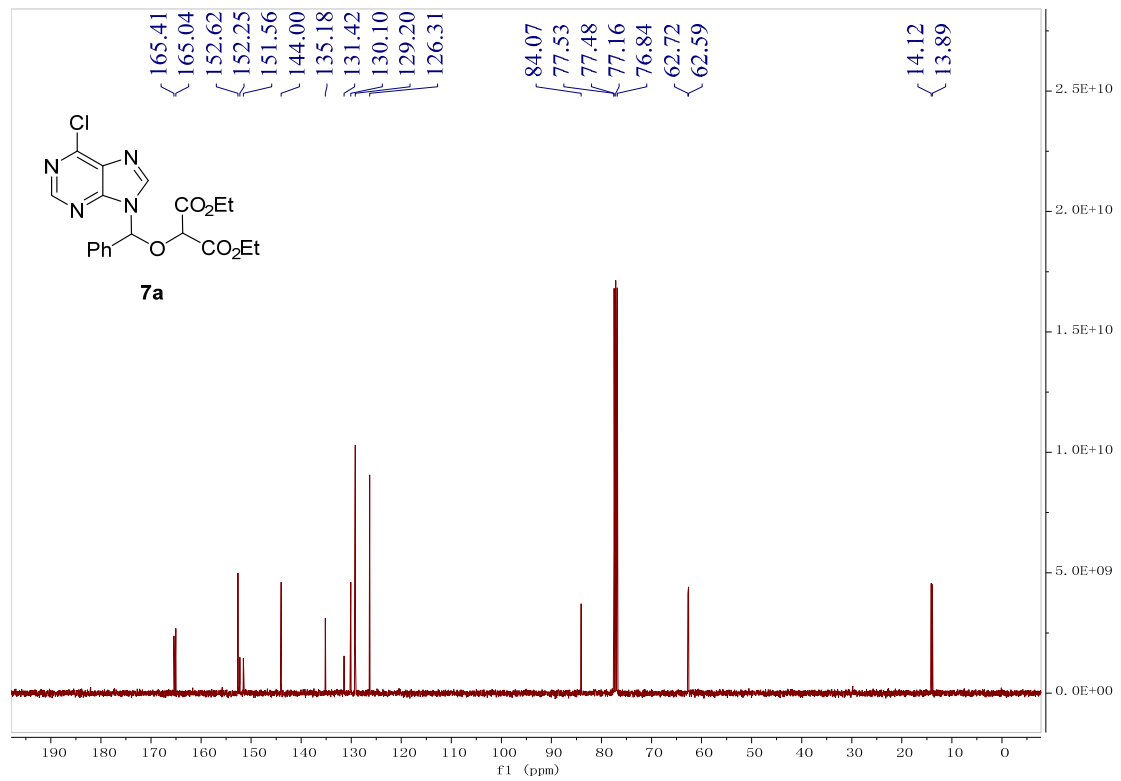

### <sup>1</sup>H NMR (400 MHz, CDCl<sub>3</sub>) for 7b

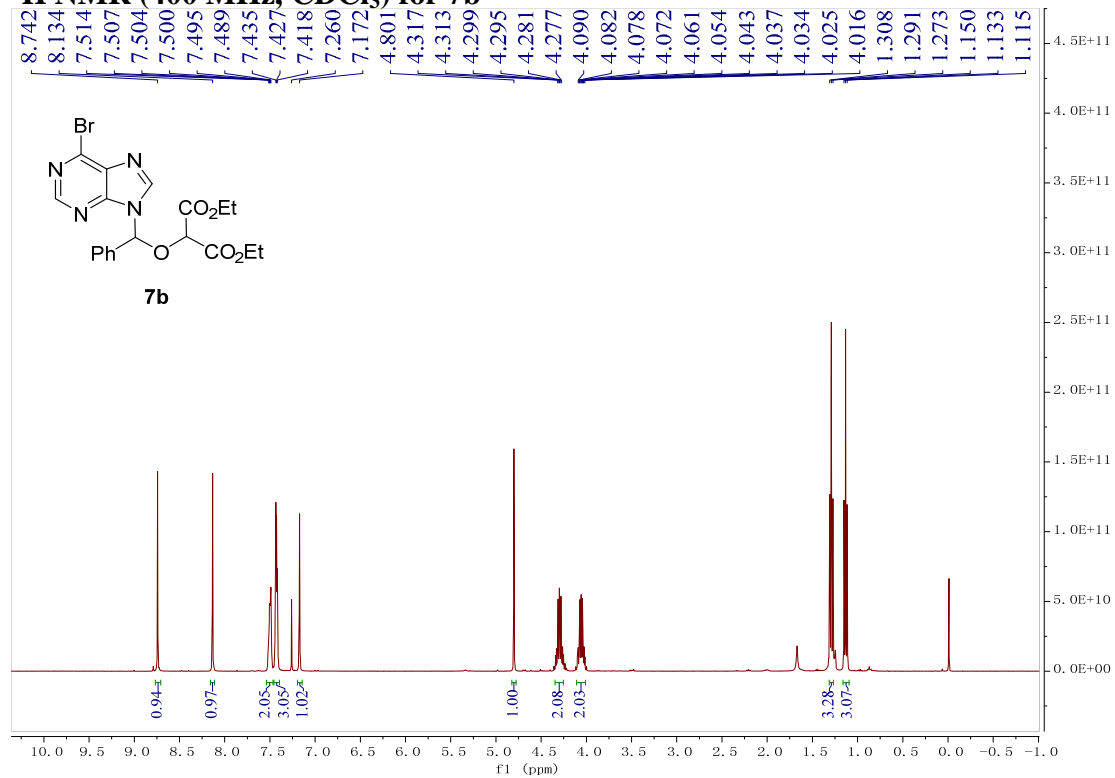

### <sup>13</sup>C NMR (100 MHz, CDCl<sub>3</sub>) for 7b

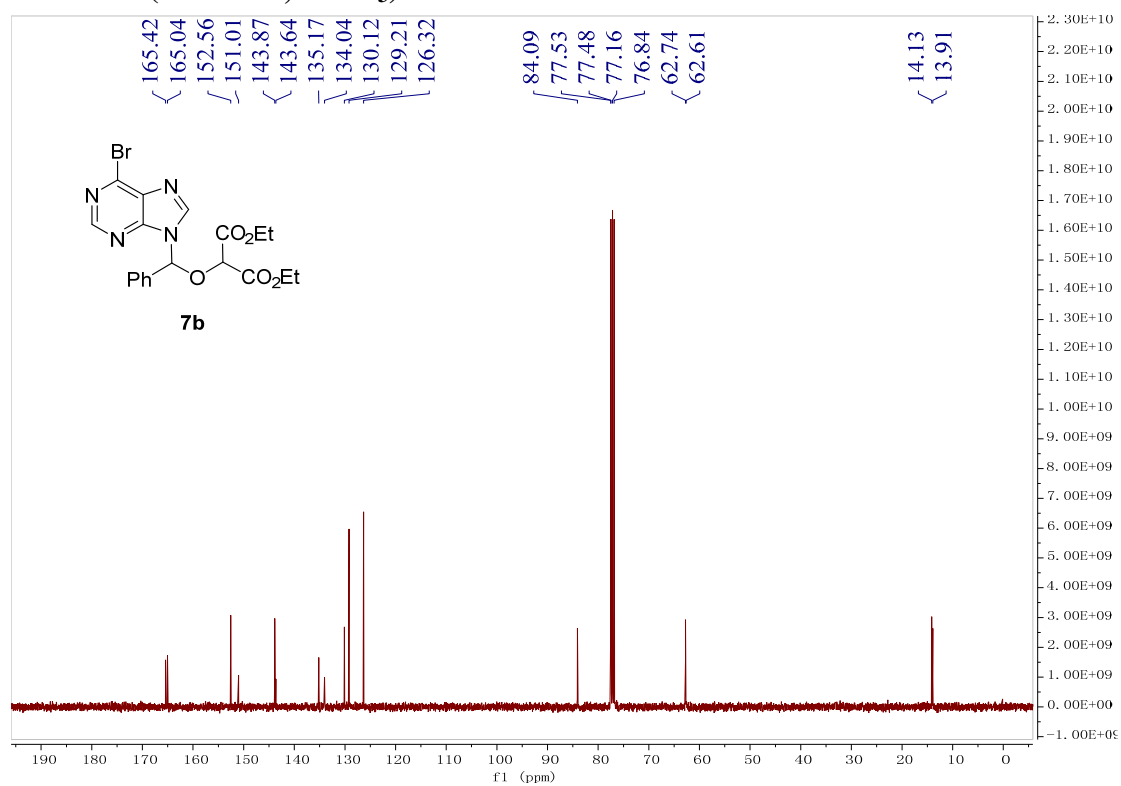

**<sup>1</sup>H NMR (600 MHz, CDCl<sub>3</sub>) for 7c**

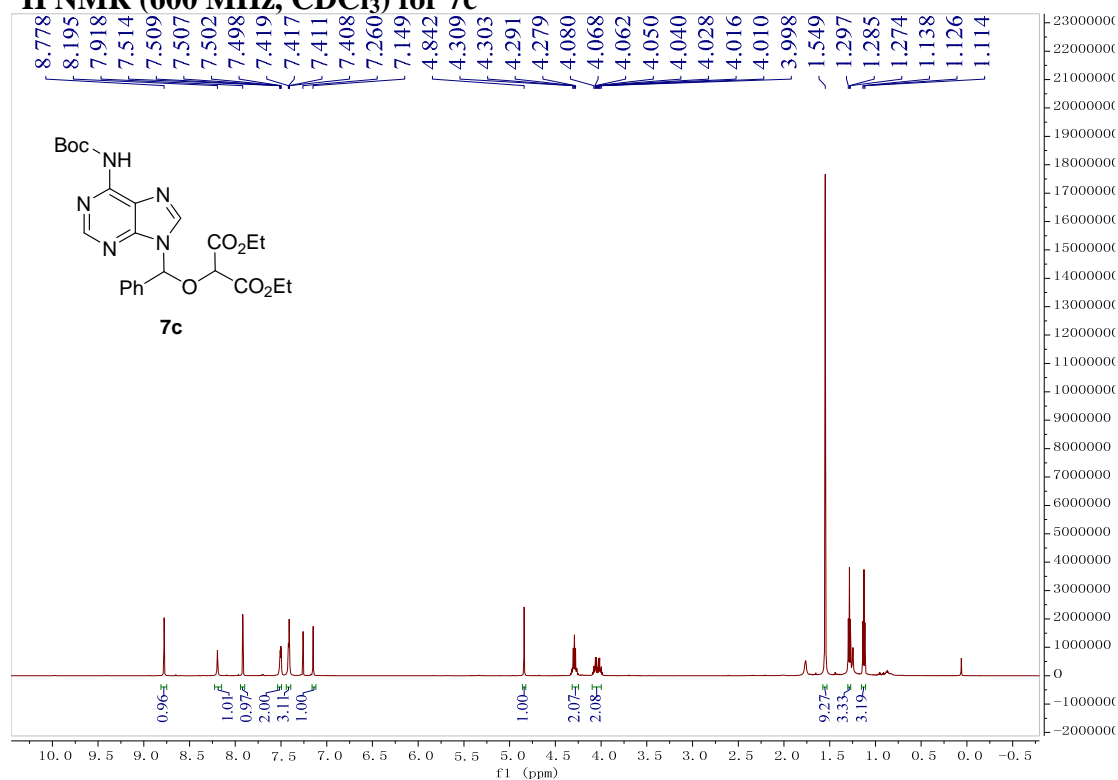

**<sup>13</sup>C NMR (150 MHz, CDCl<sub>3</sub>) for 7c**

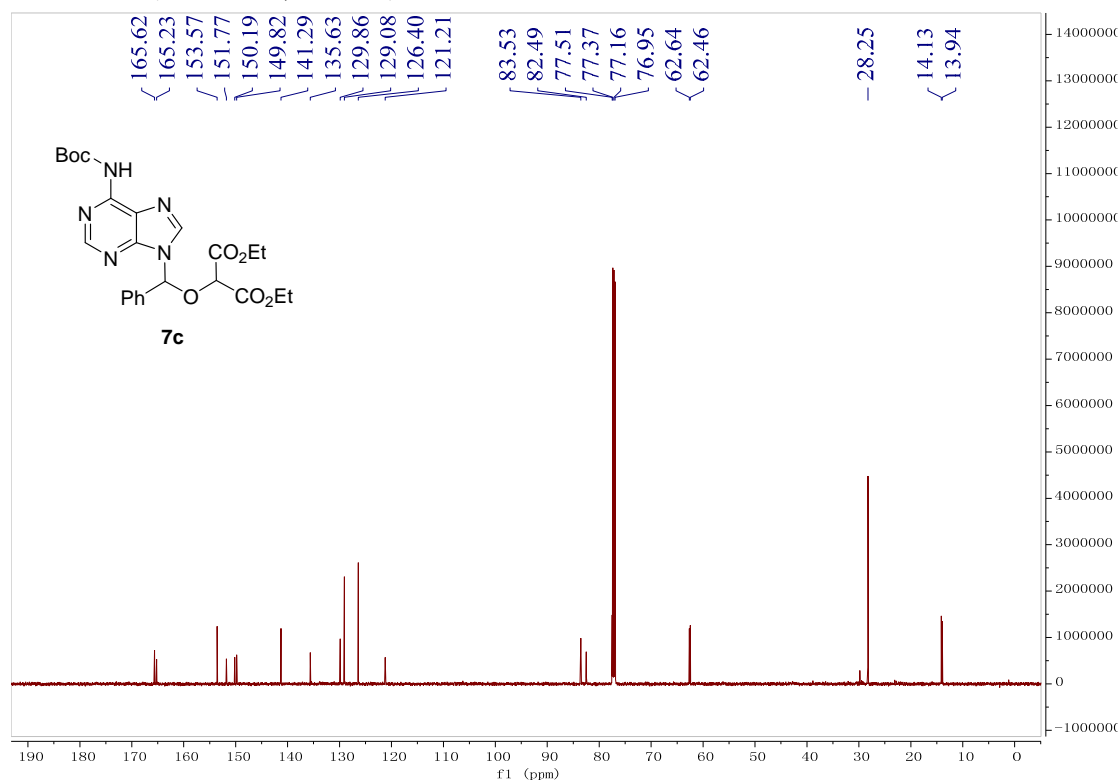

**<sup>1</sup>H NMR (400 MHz, CDCl<sub>3</sub>) for 7d**

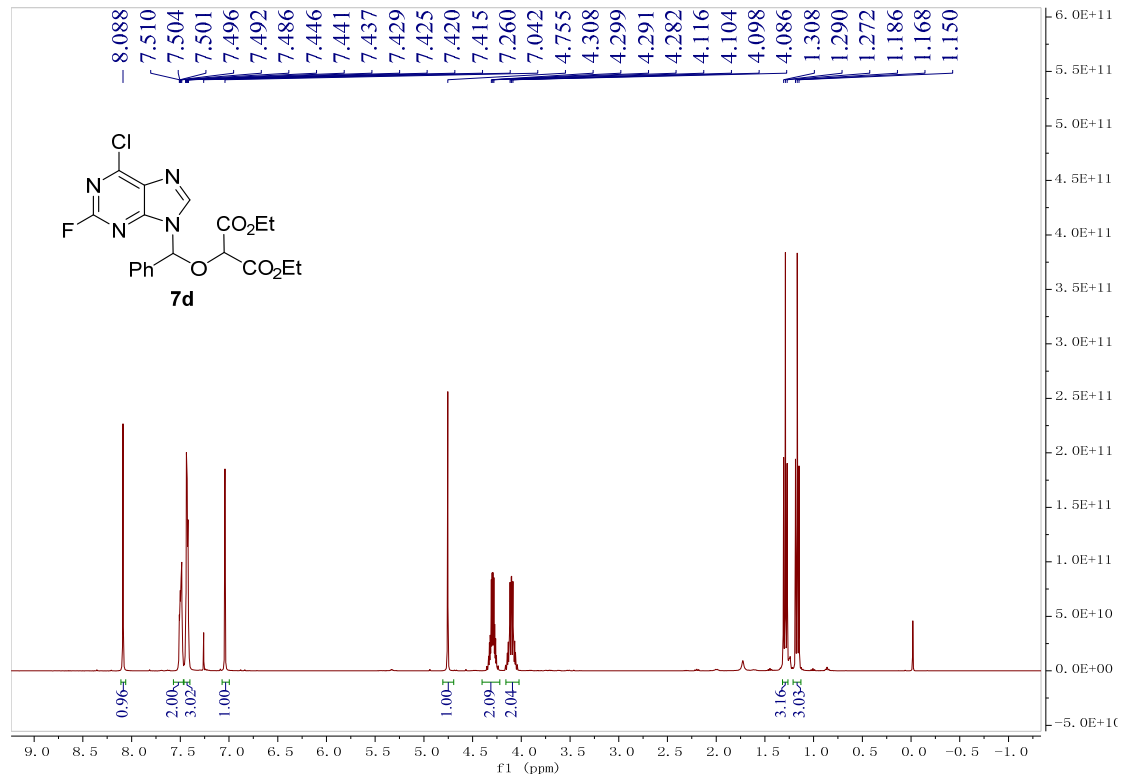

**<sup>13</sup>C NMR (100 MHz, CDCl<sub>3</sub>) for 7d**

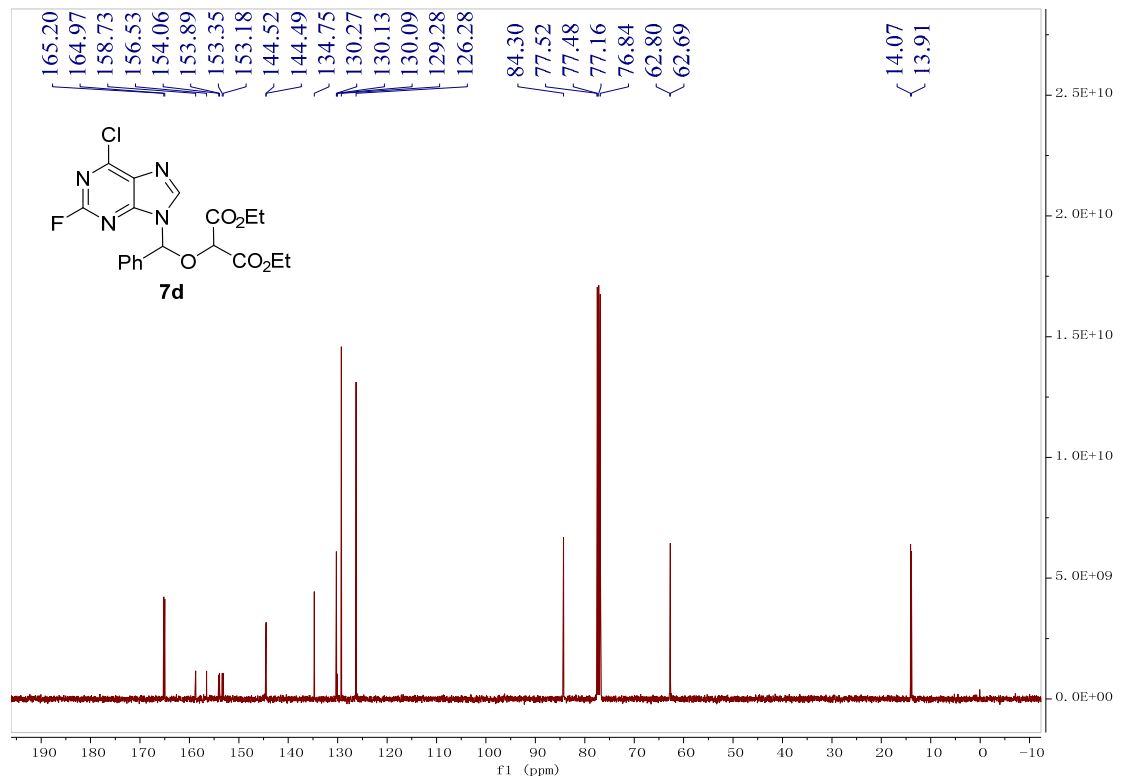

**<sup>19</sup>F NMR (376 MHz, CDCl<sub>3</sub>) for 7d**

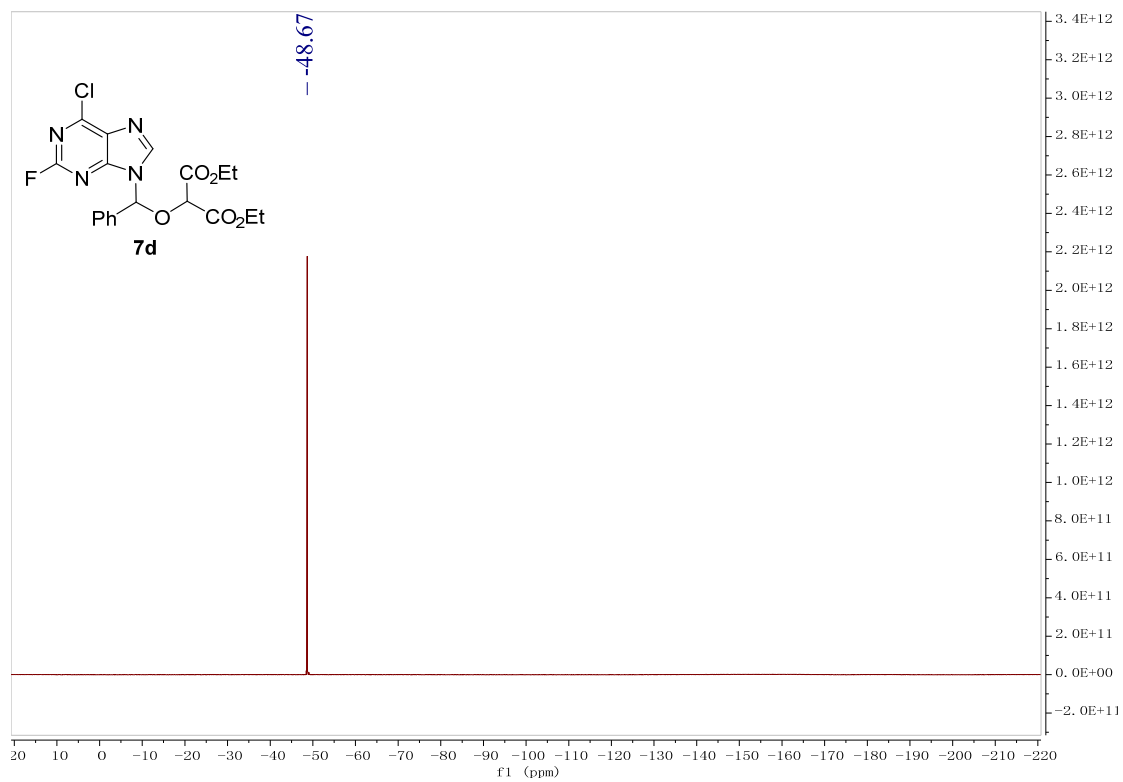



**<sup>1</sup>H NMR (400 MHz, CDCl<sub>3</sub>) for 7e**

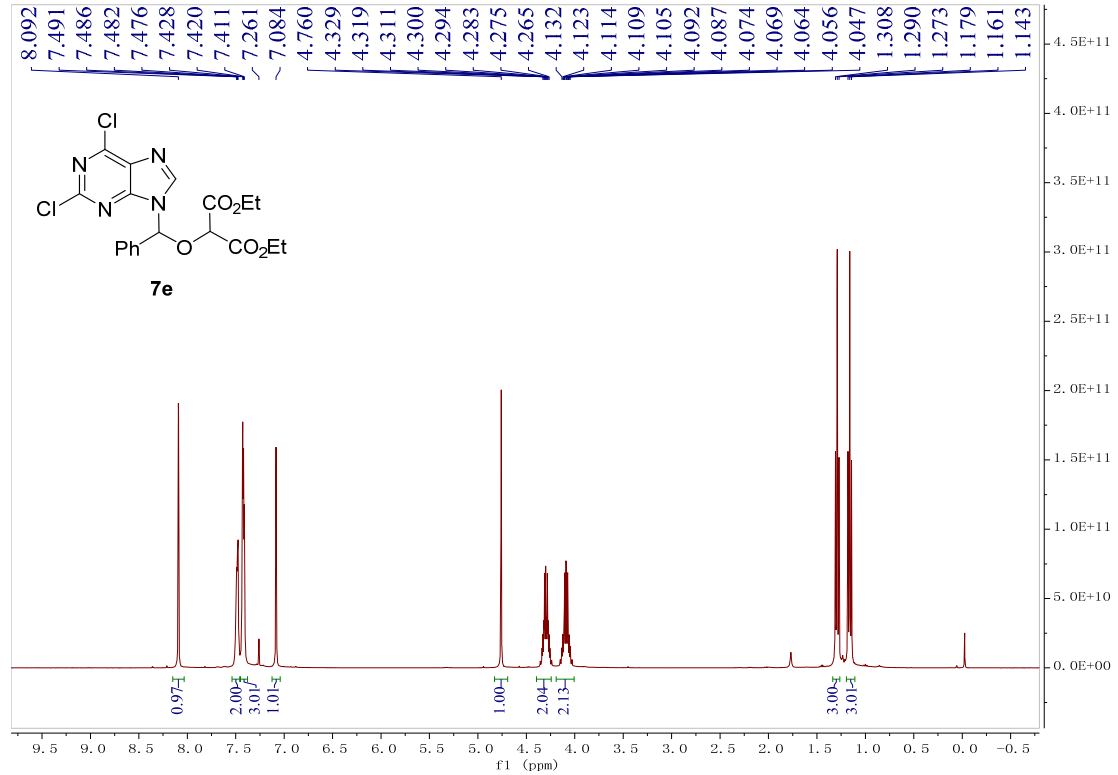

**<sup>13</sup>C NMR (100 MHz, CDCl<sub>3</sub>) for 7e**

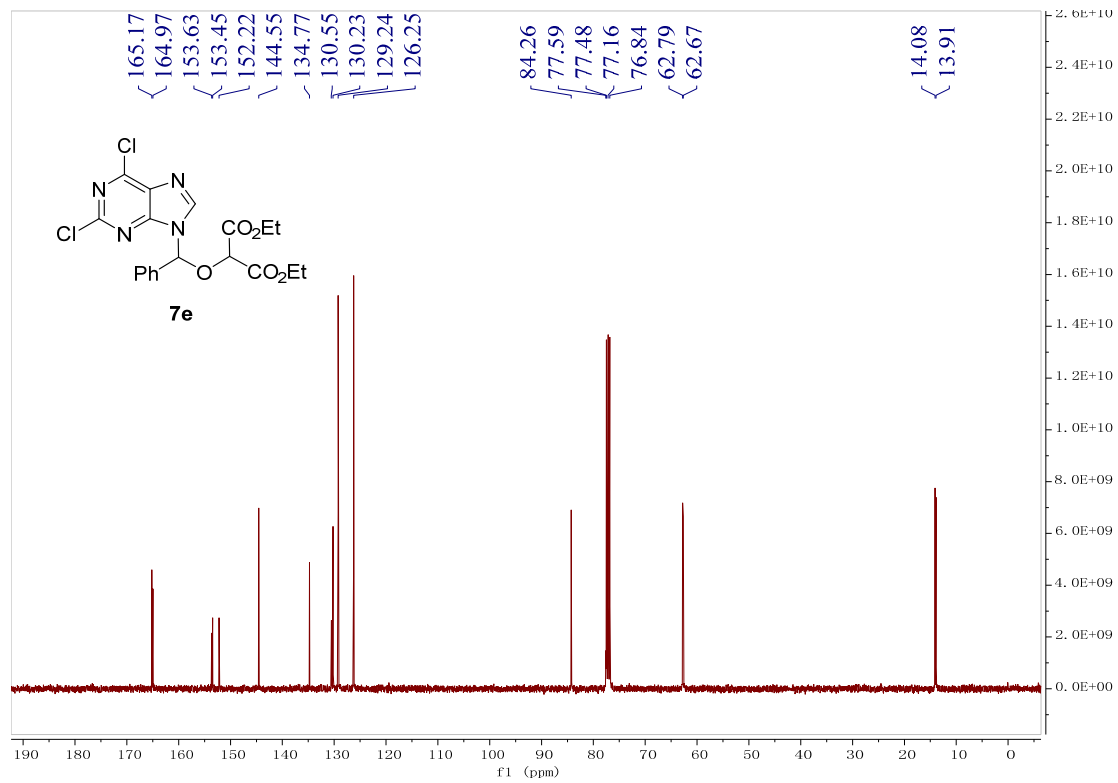

**<sup>1</sup>H NMR (400 MHz, CDCl<sub>3</sub>) for 7f**

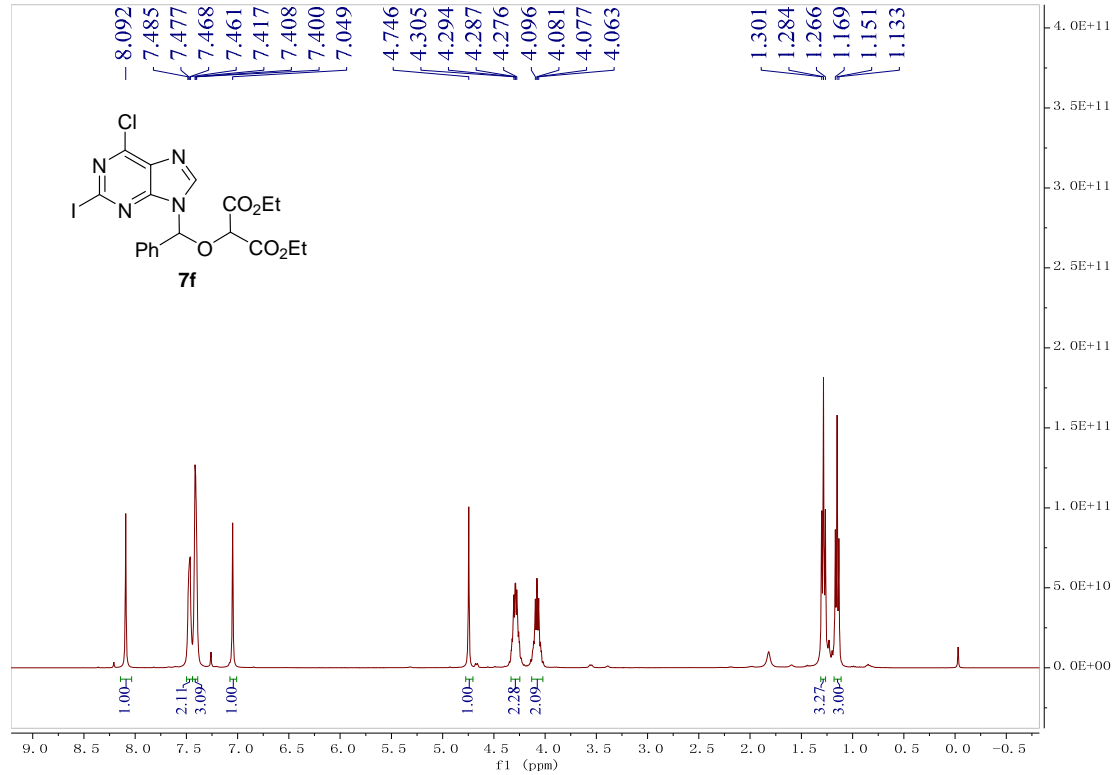

**<sup>13</sup>C NMR (100 MHz, CDCl<sub>3</sub>) for 7f**

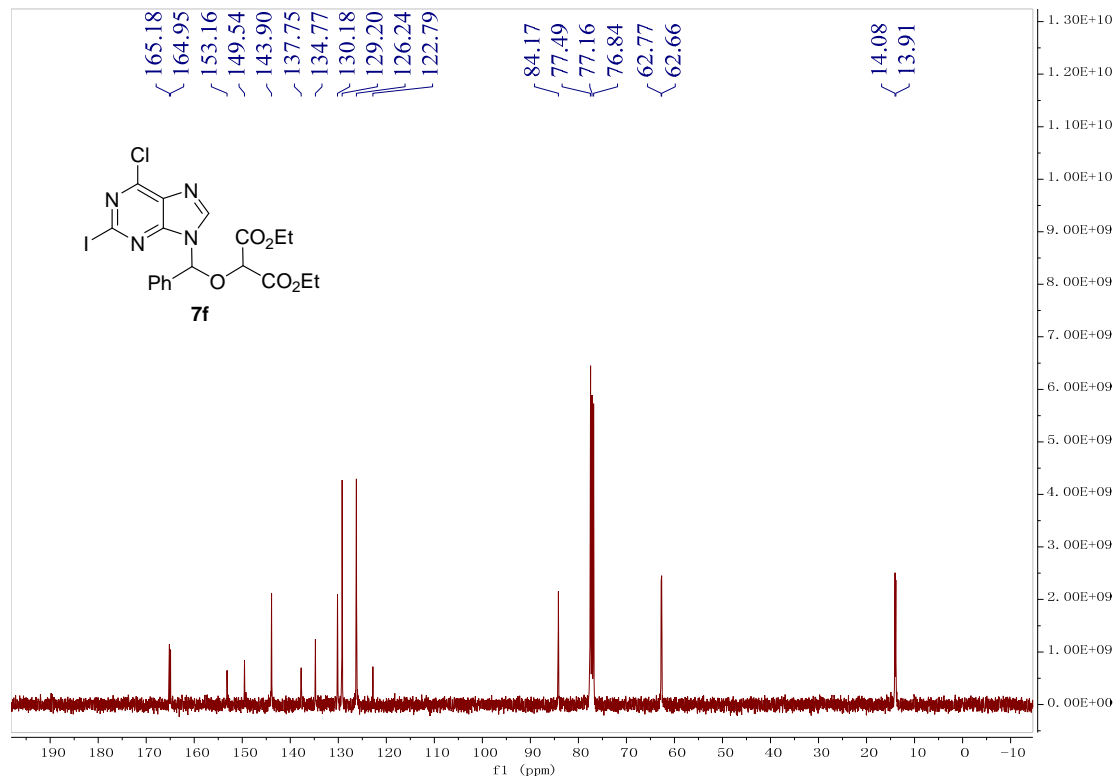

**<sup>1</sup>H NMR (400 MHz, CDCl<sub>3</sub>) for 7g**

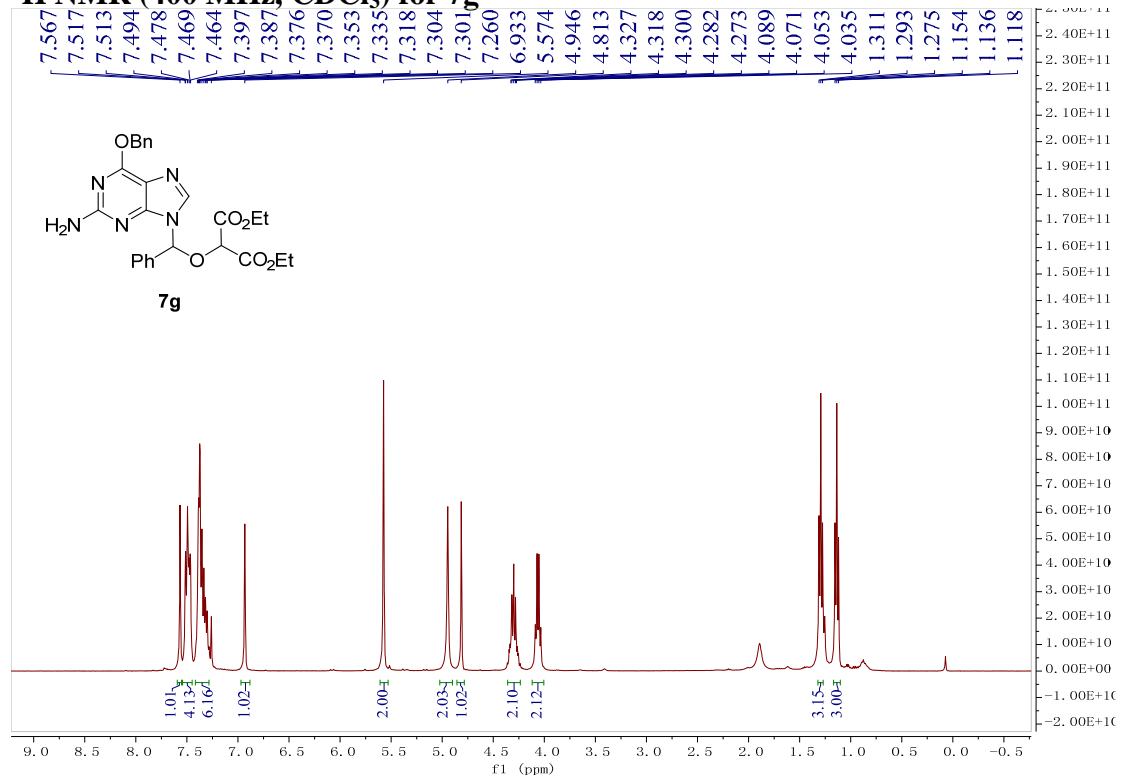

**<sup>13</sup>C NMR (100 MHz, CDCl<sub>3</sub>) for 7g**

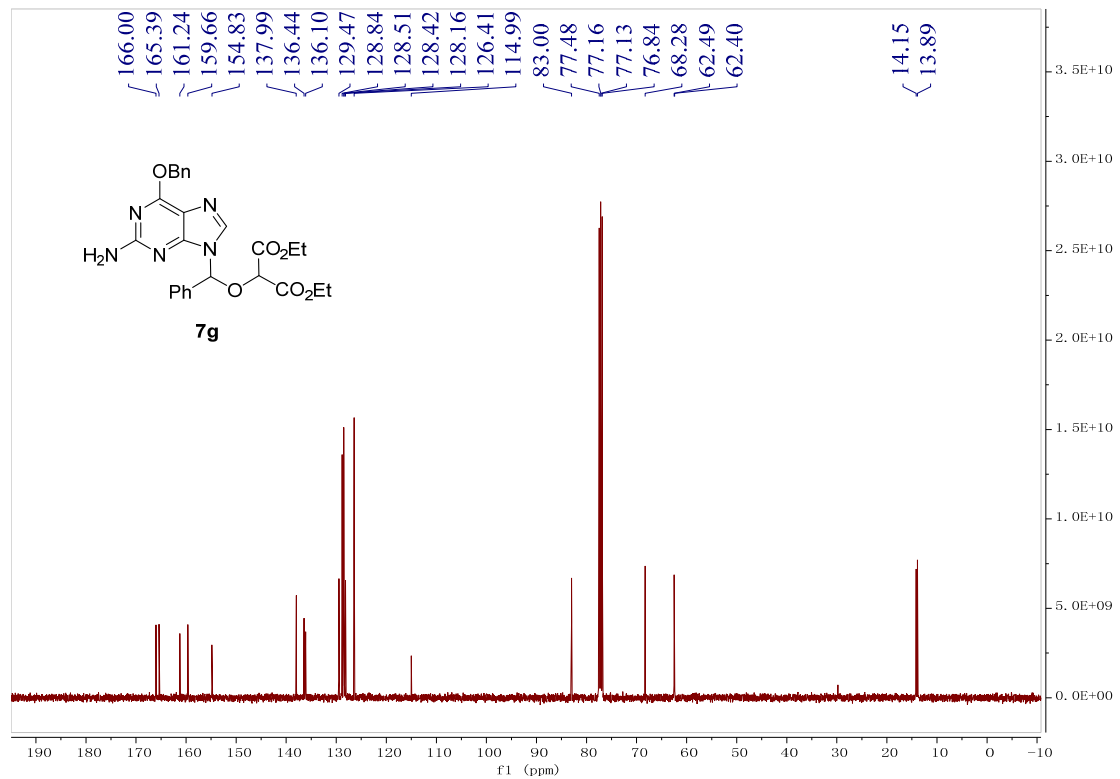

**<sup>1</sup>H NMR (400 MHz, CDCl<sub>3</sub>) for 7h**

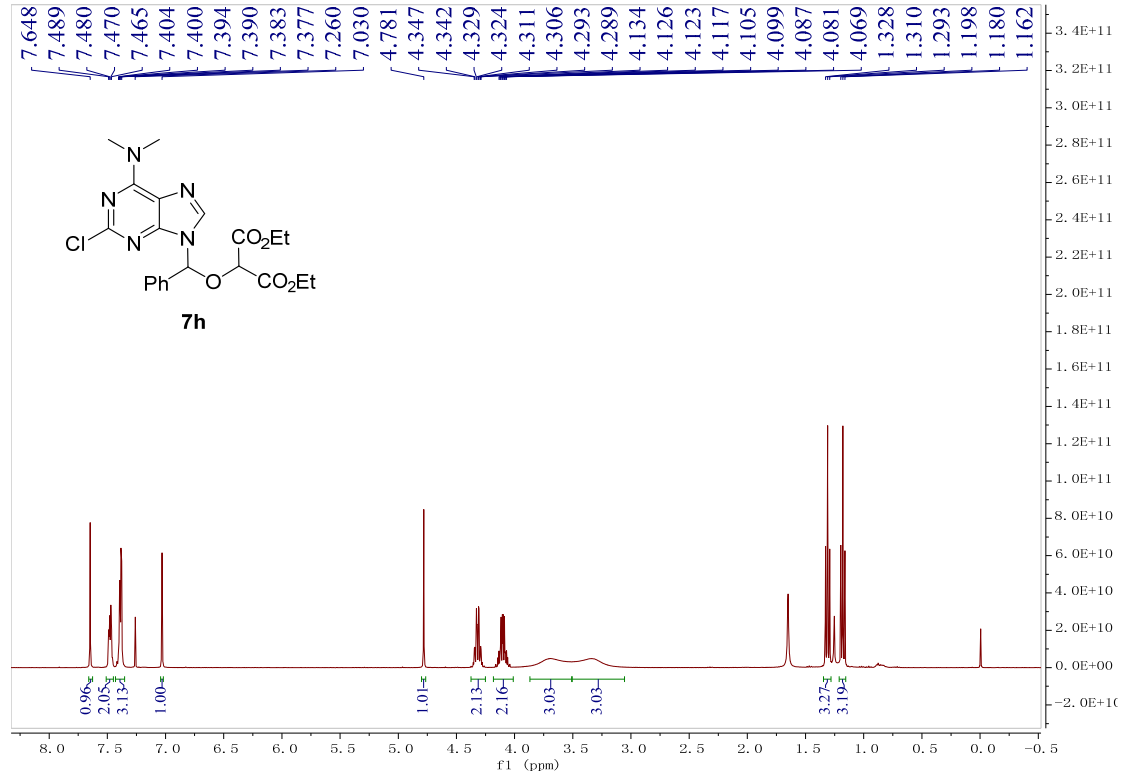

**<sup>13</sup>C NMR (100 MHz, CDCl<sub>3</sub>) for 7h**

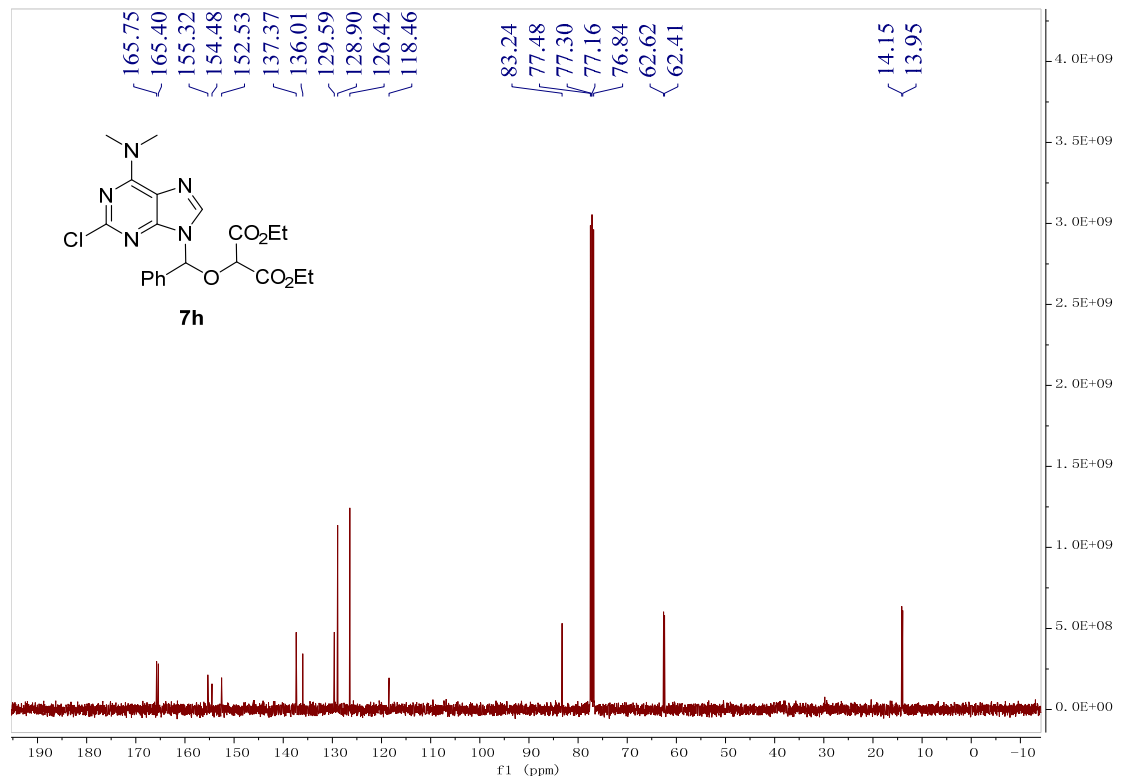

**<sup>1</sup>H NMR (600 MHz, CDCl<sub>3</sub>) for 7i**

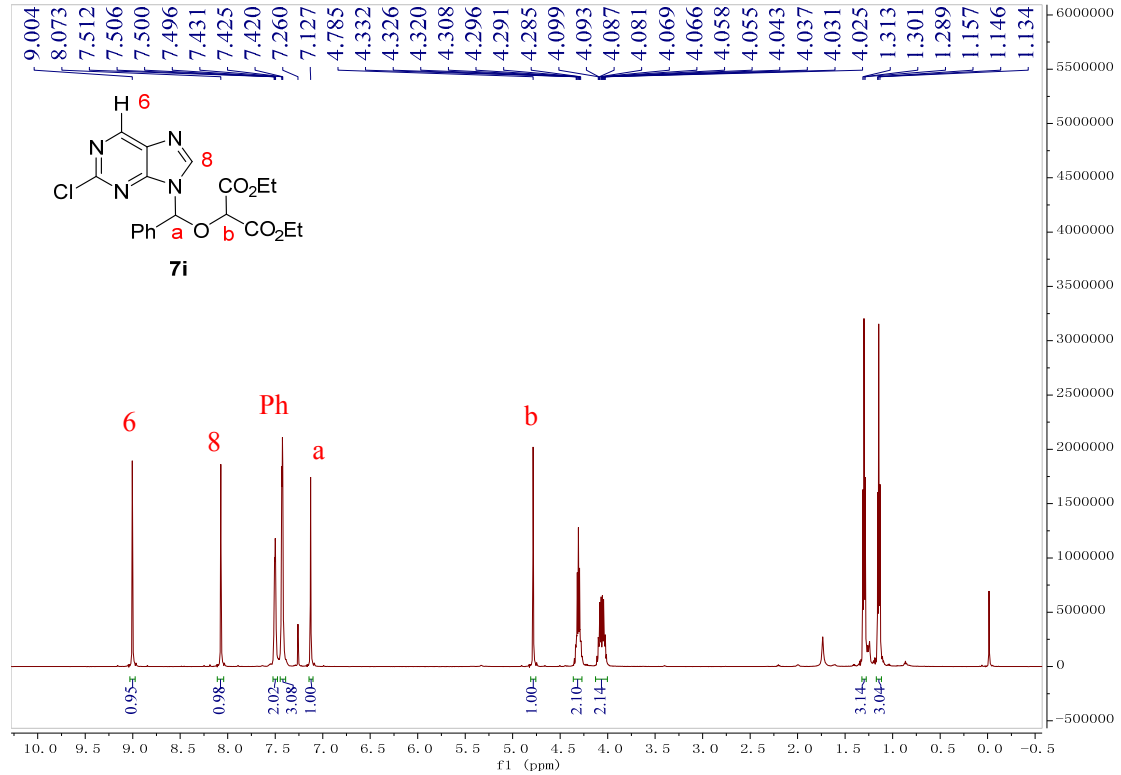

**<sup>13</sup>C NMR (150 MHz, CDCl<sub>3</sub>) for 7i**

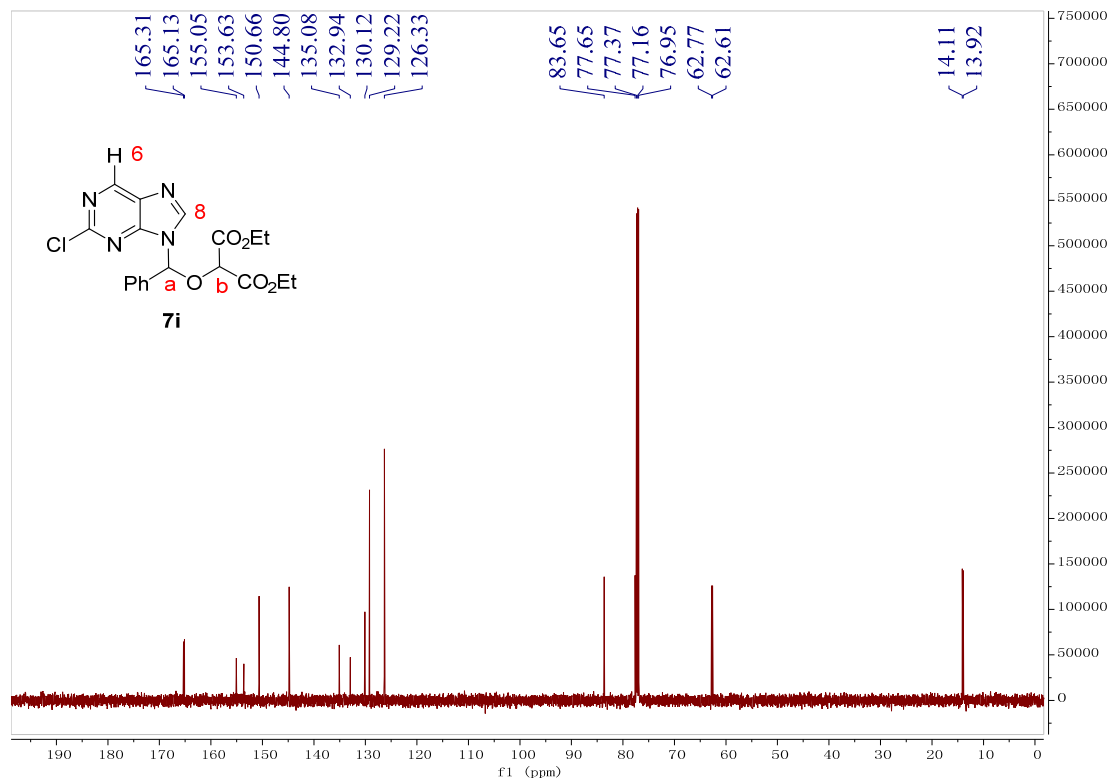

### HSQC of 7i

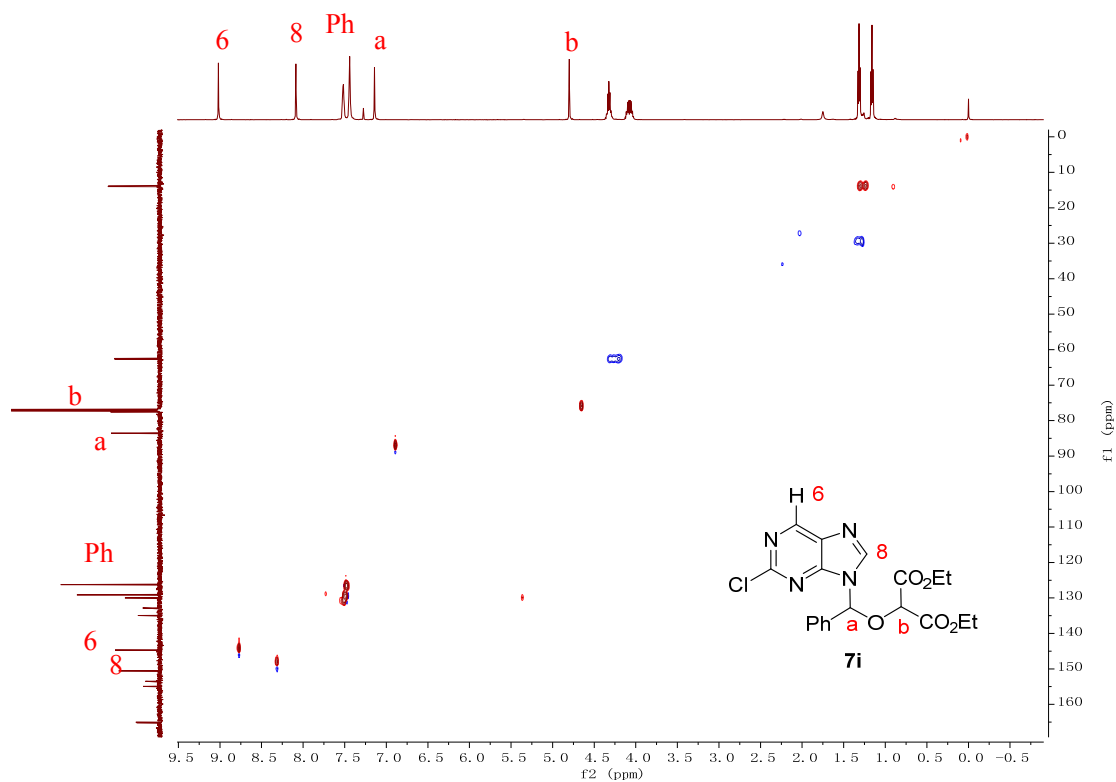

### NOESY of 7i

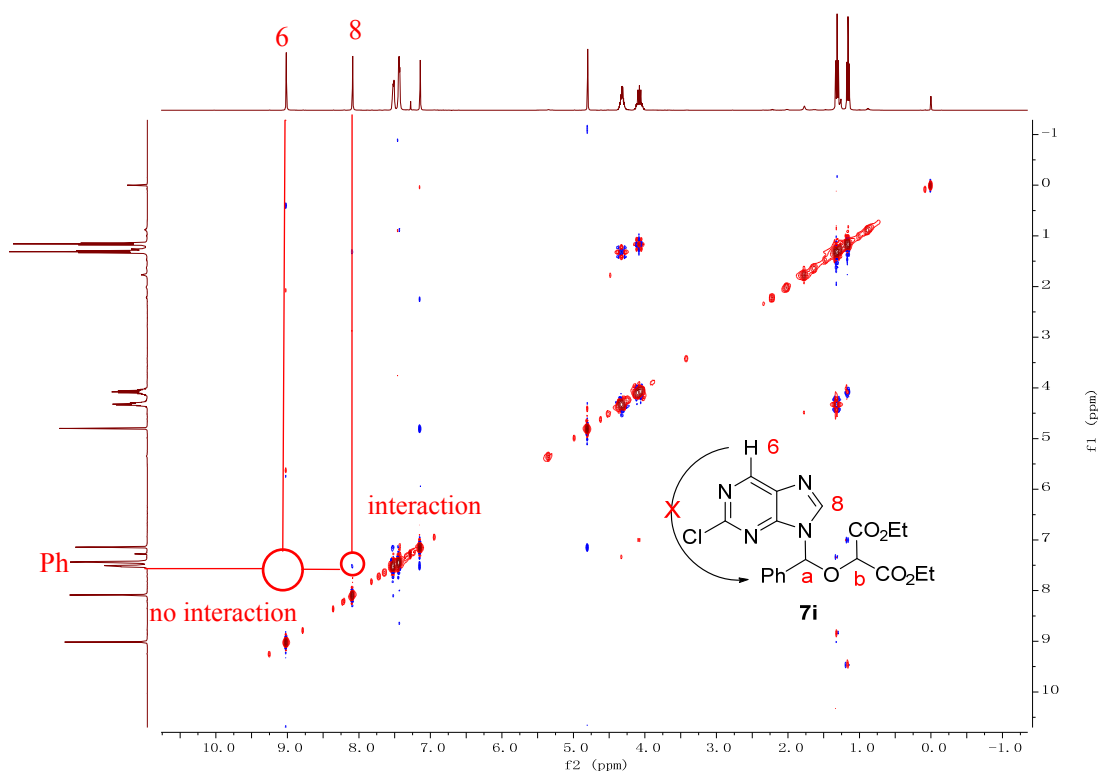

The enlarge NOE single is as follows

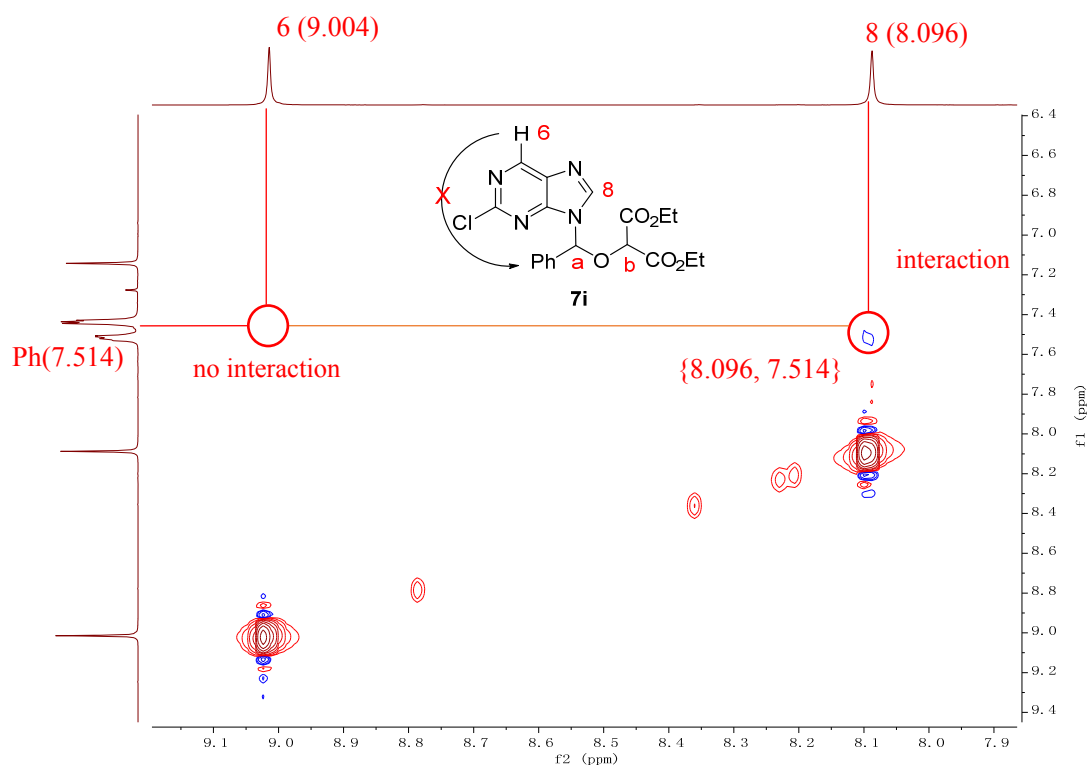

**<sup>1</sup>H NMR (600 MHz, CDCl<sub>3</sub>) for 7i'**

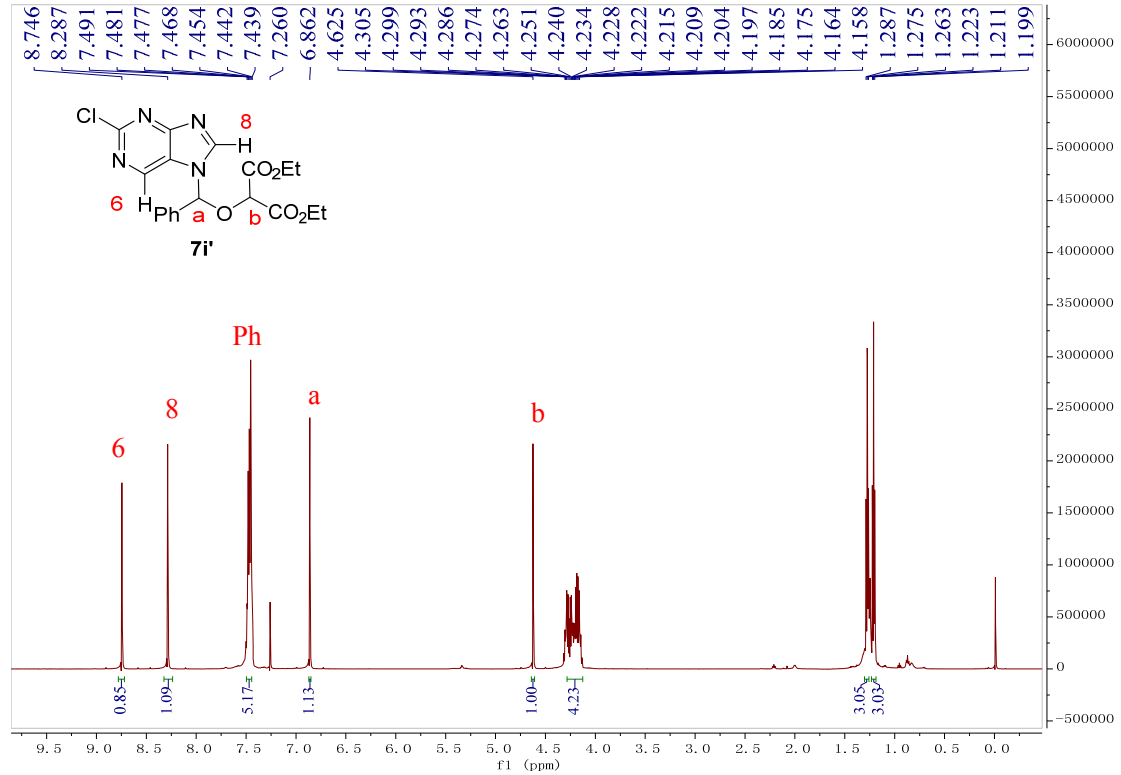

**<sup>13</sup>C NMR (100 MHz, CDCl<sub>3</sub>) for 7i'**

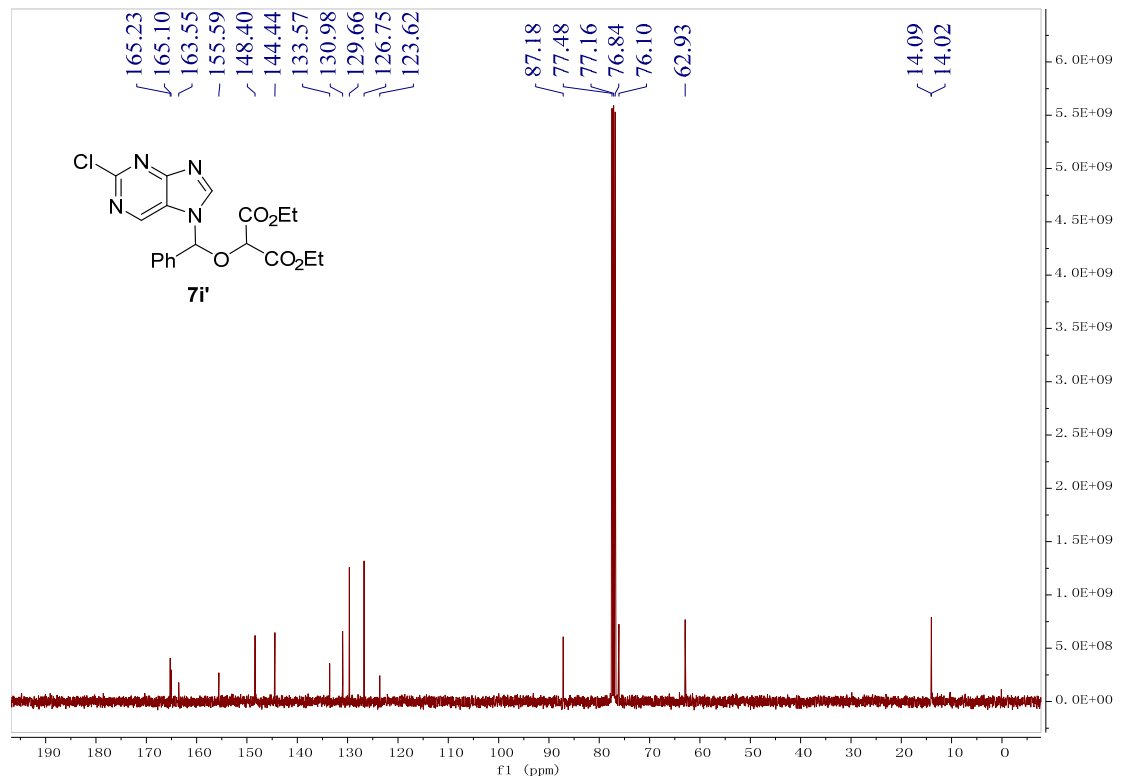



### HSQC of 7i'

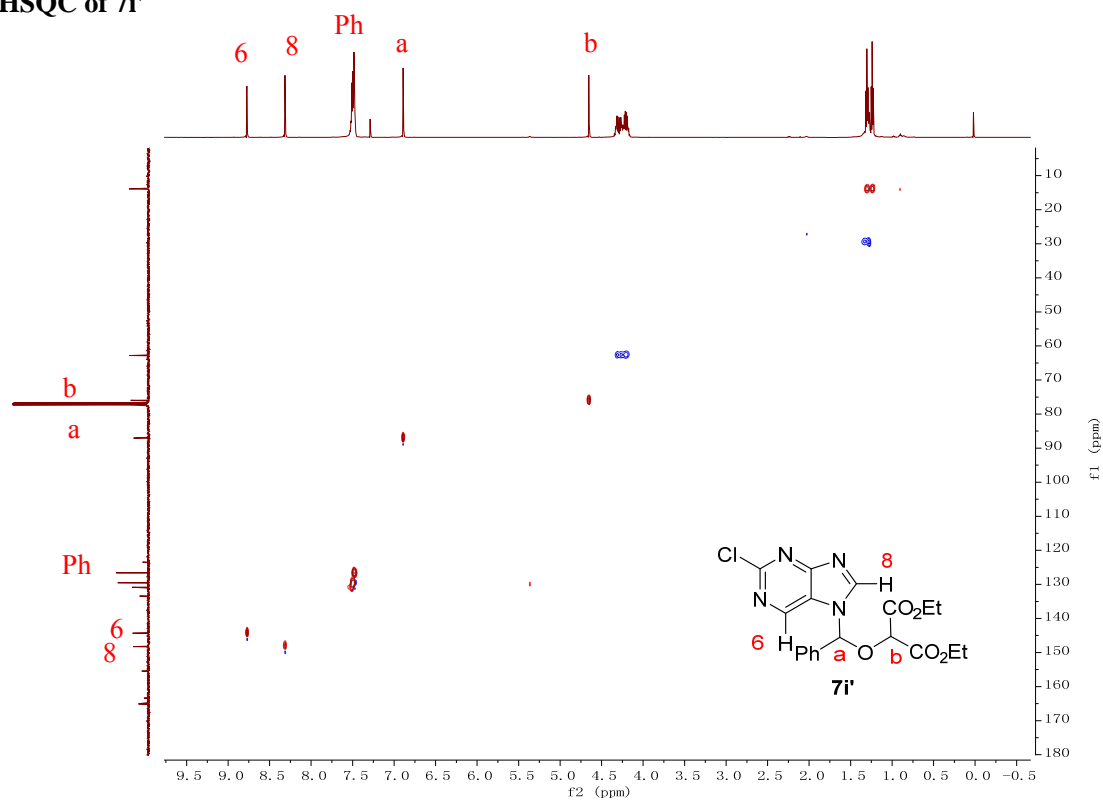

### NOESY of 7i'

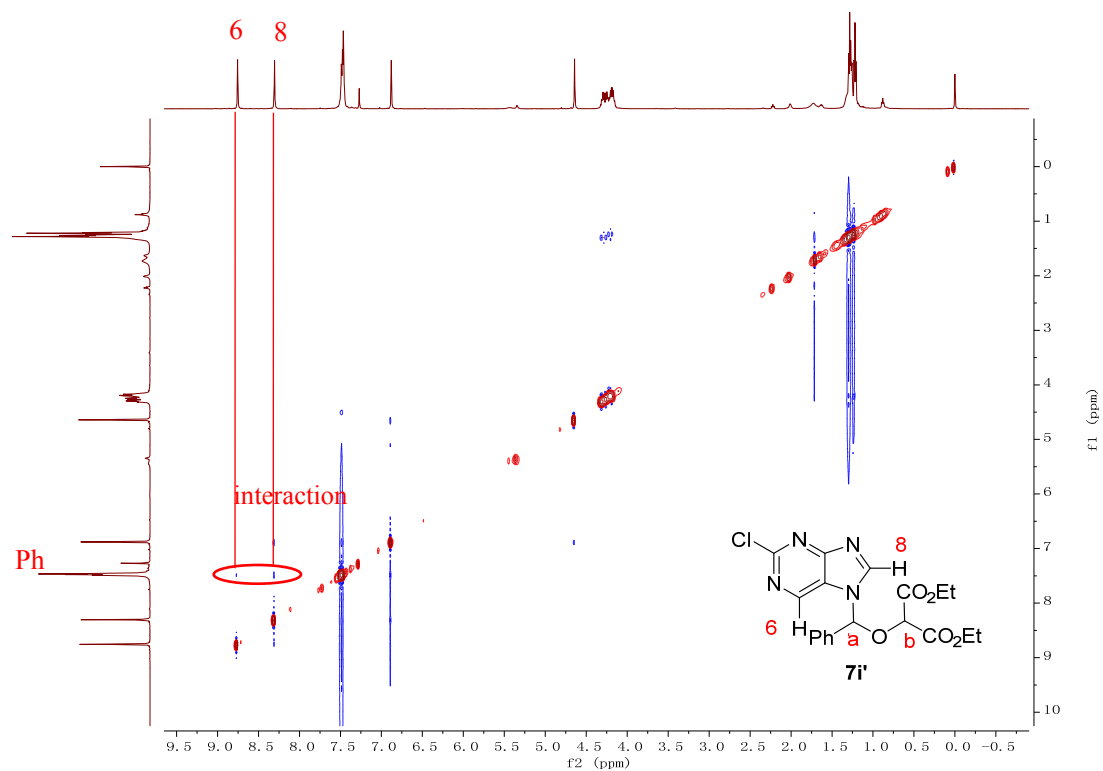

The enlarge NOE single is as follows

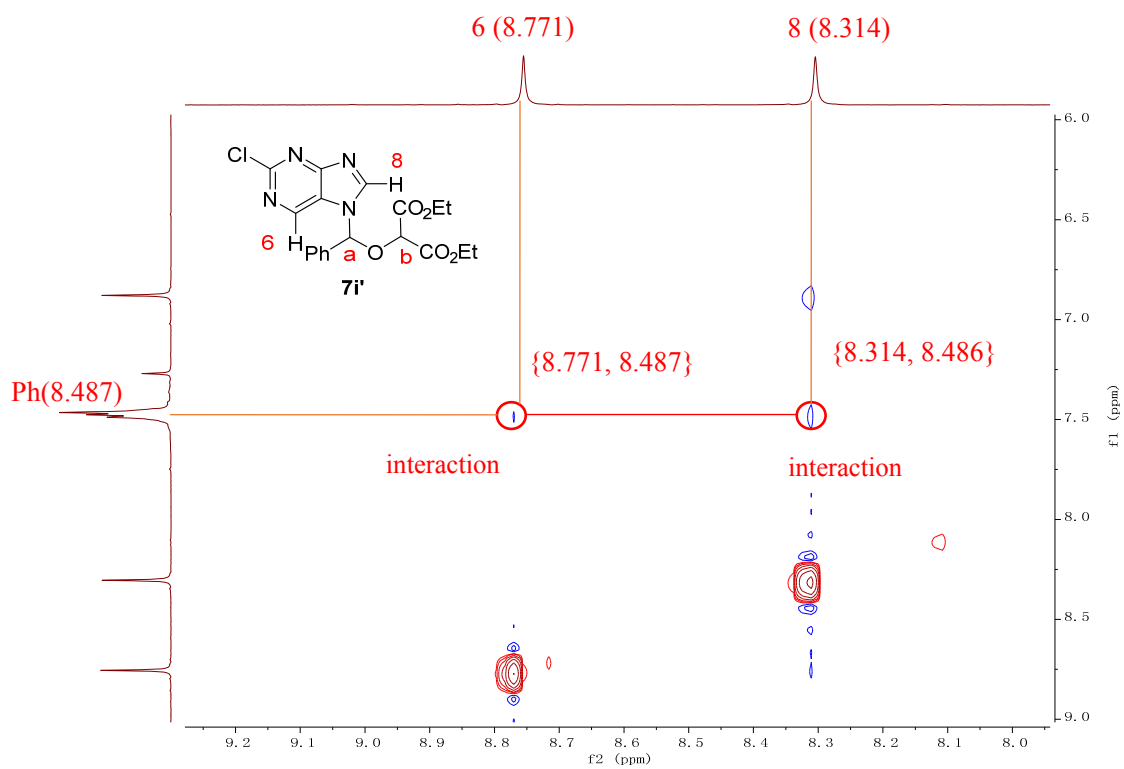

**<sup>1</sup>H NMR (400 MHz, CDCl<sub>3</sub>) for 7j**

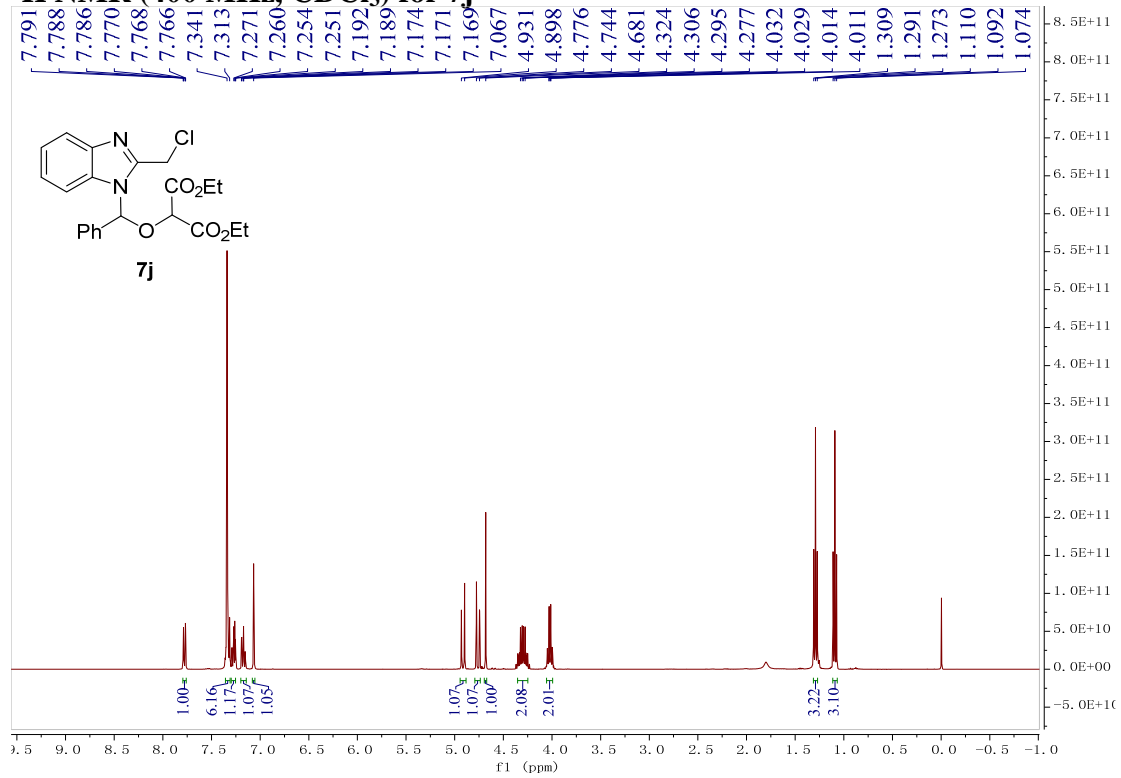

**<sup>13</sup>C NMR (100 MHz, CDCl<sub>3</sub>) for 7j**

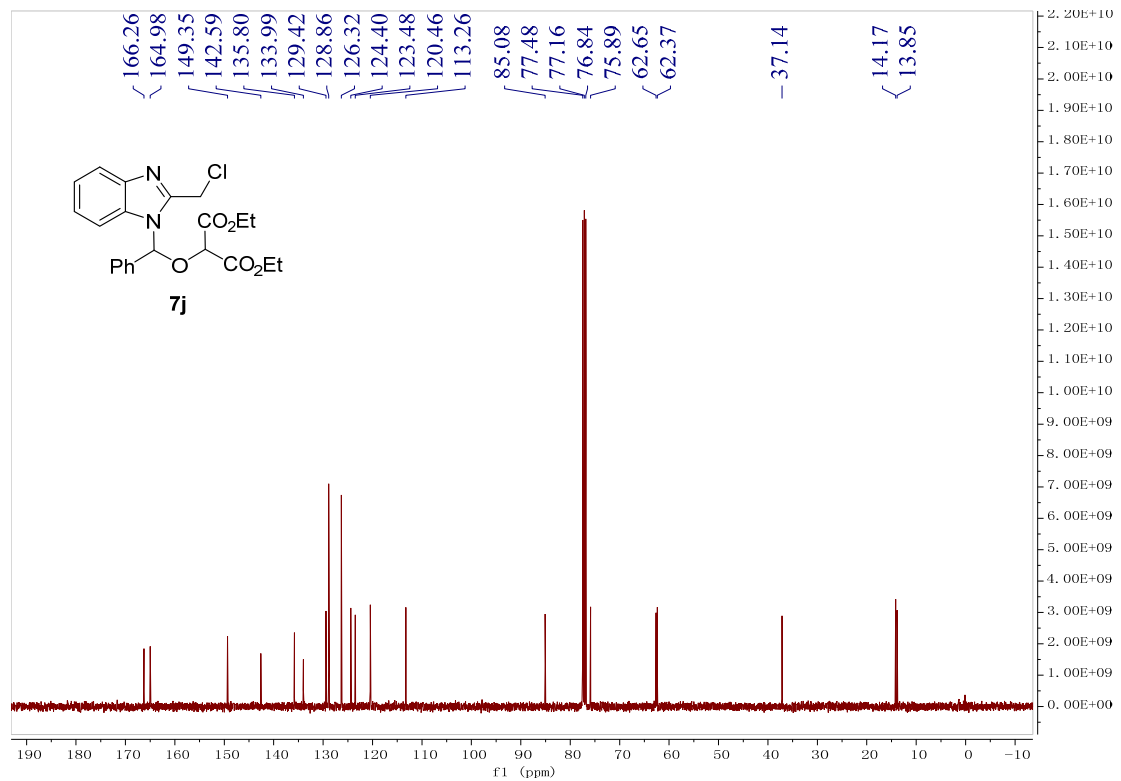

### <sup>1</sup>H NMR (400 MHz, CDCl<sub>3</sub>) for 7k

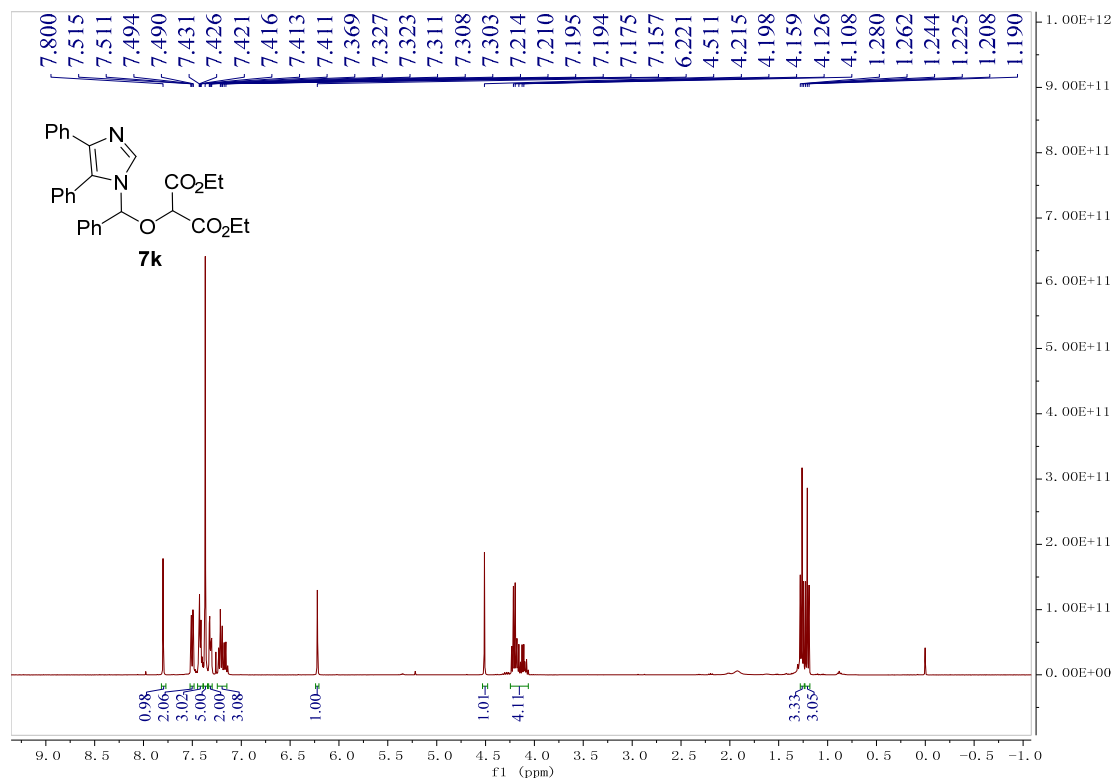

### <sup>13</sup>C NMR (100 MHz, CDCl<sub>3</sub>) for 7k

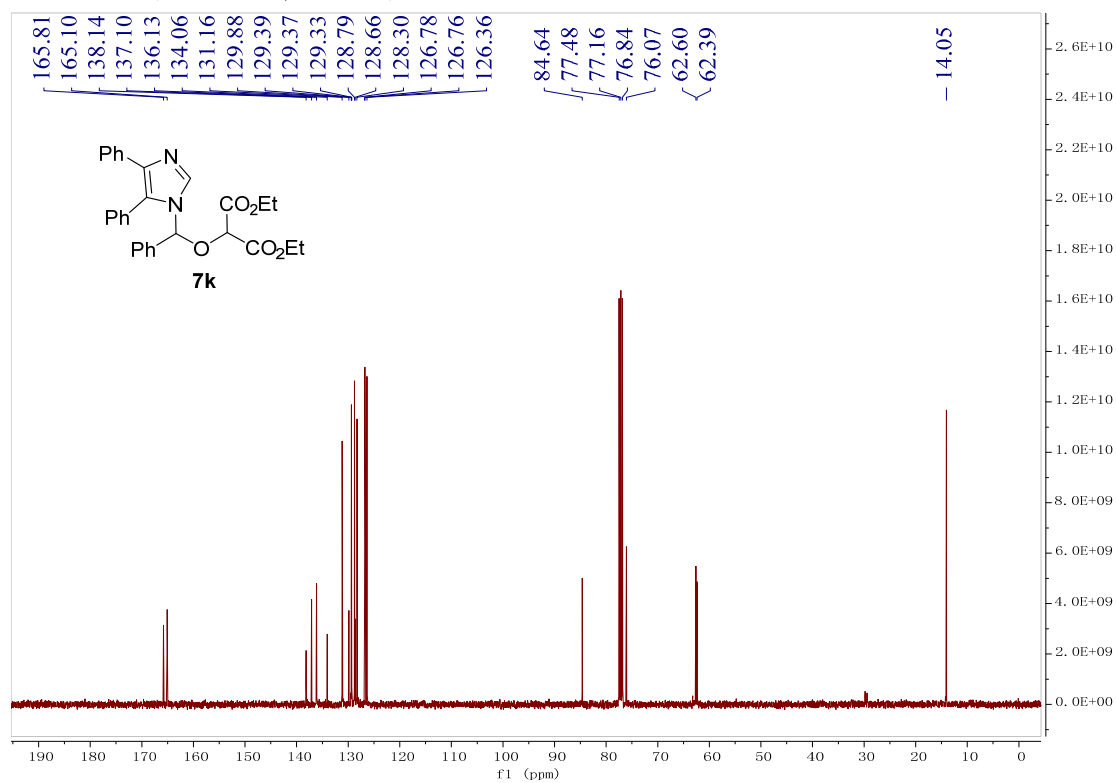

**<sup>1</sup>H NMR (400 MHz, CDCl<sub>3</sub>) for 71**

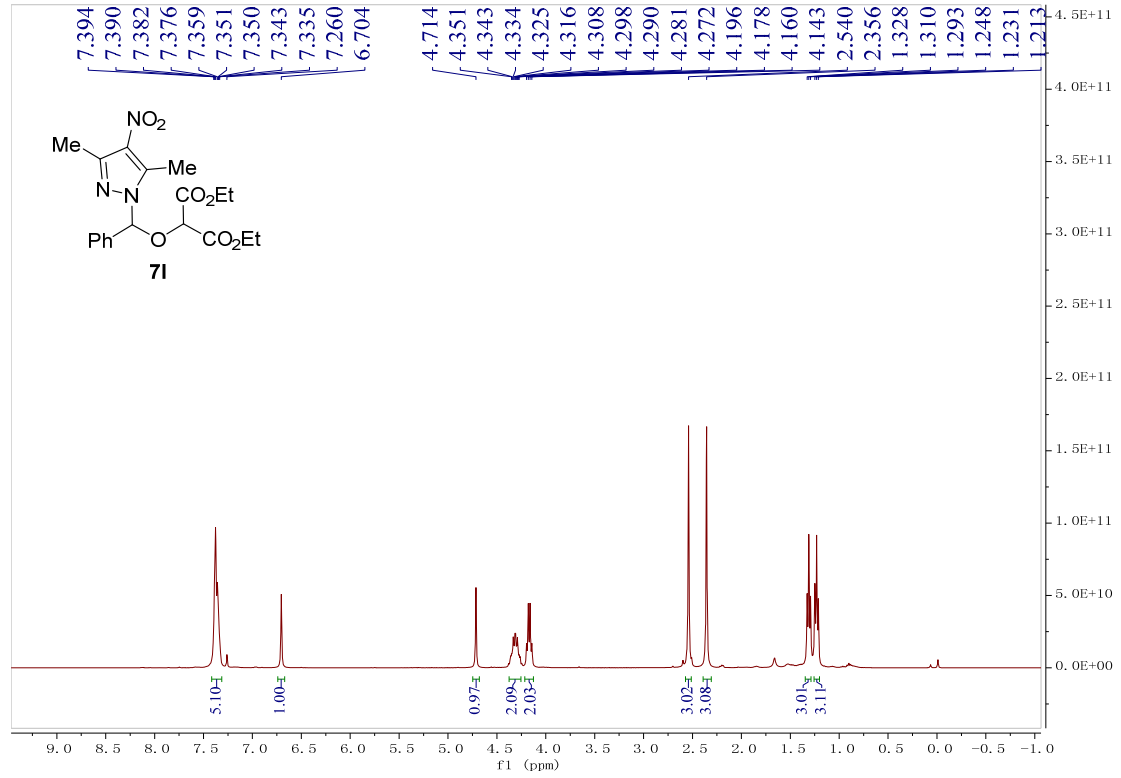

**<sup>13</sup>C NMR (100 MHz, CDCl<sub>3</sub>) for 71**

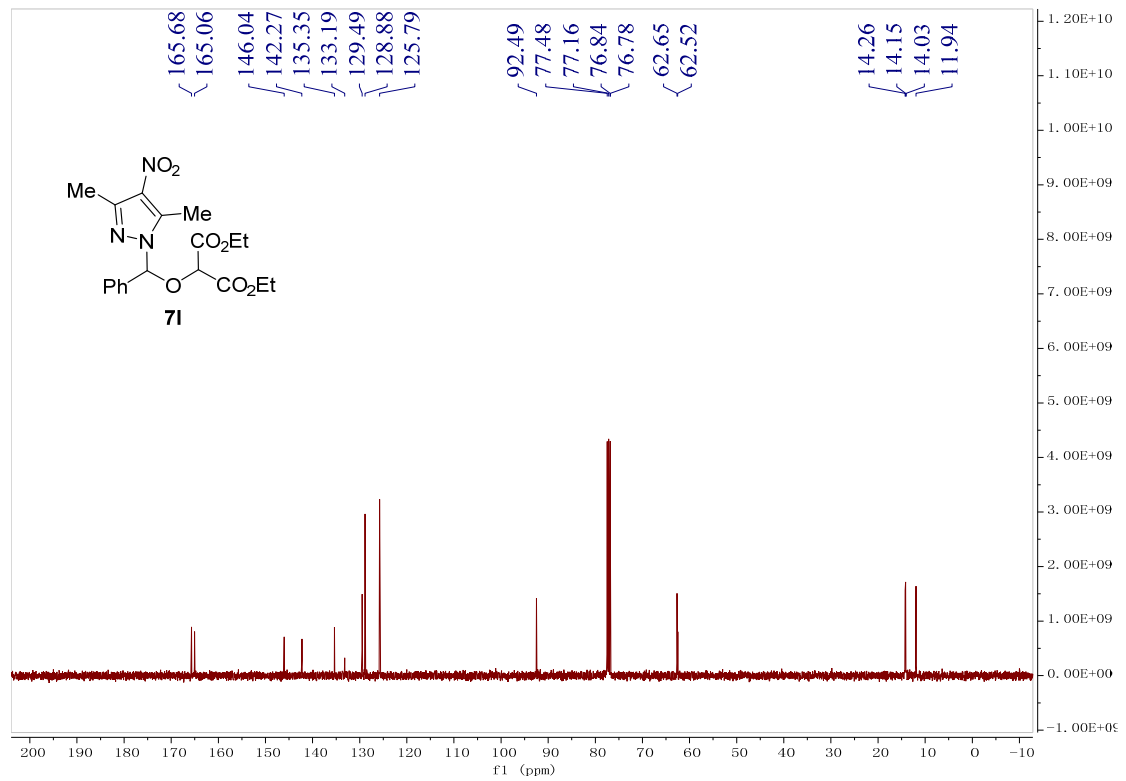

**<sup>1</sup>H NMR (600 MHz, CDCl<sub>3</sub>) for 8g**

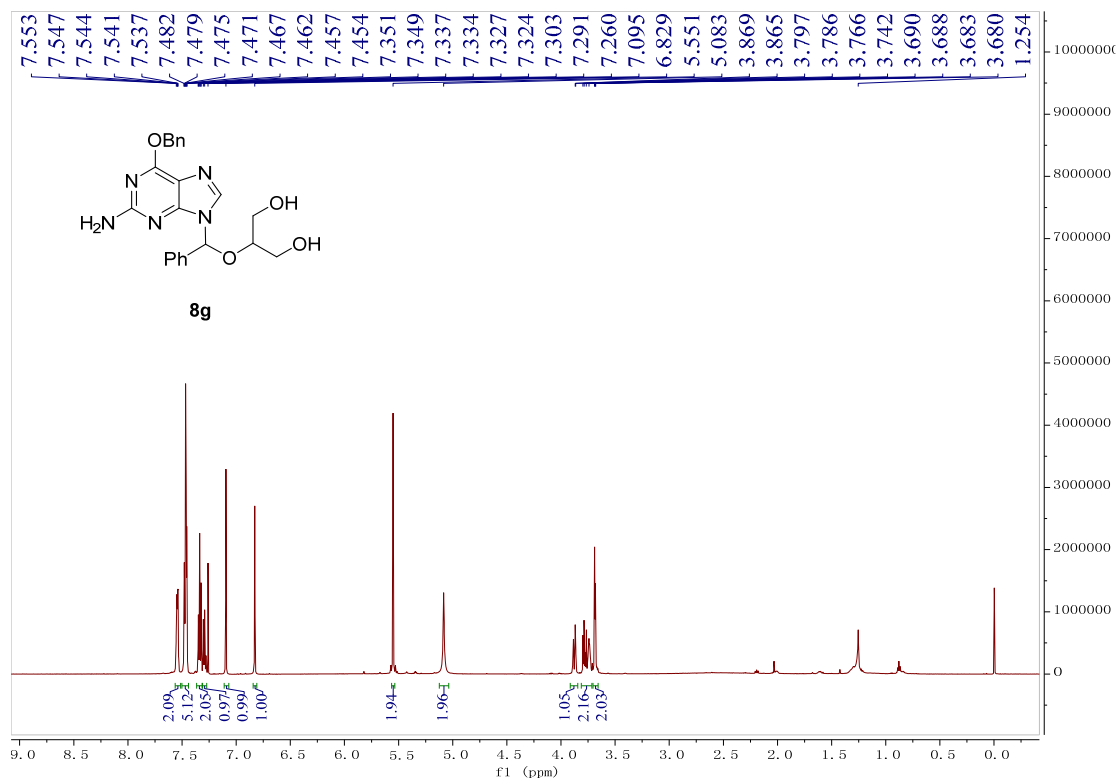

**<sup>13</sup>C NMR (150 MHz, CDCl<sub>3</sub>) for 8g**

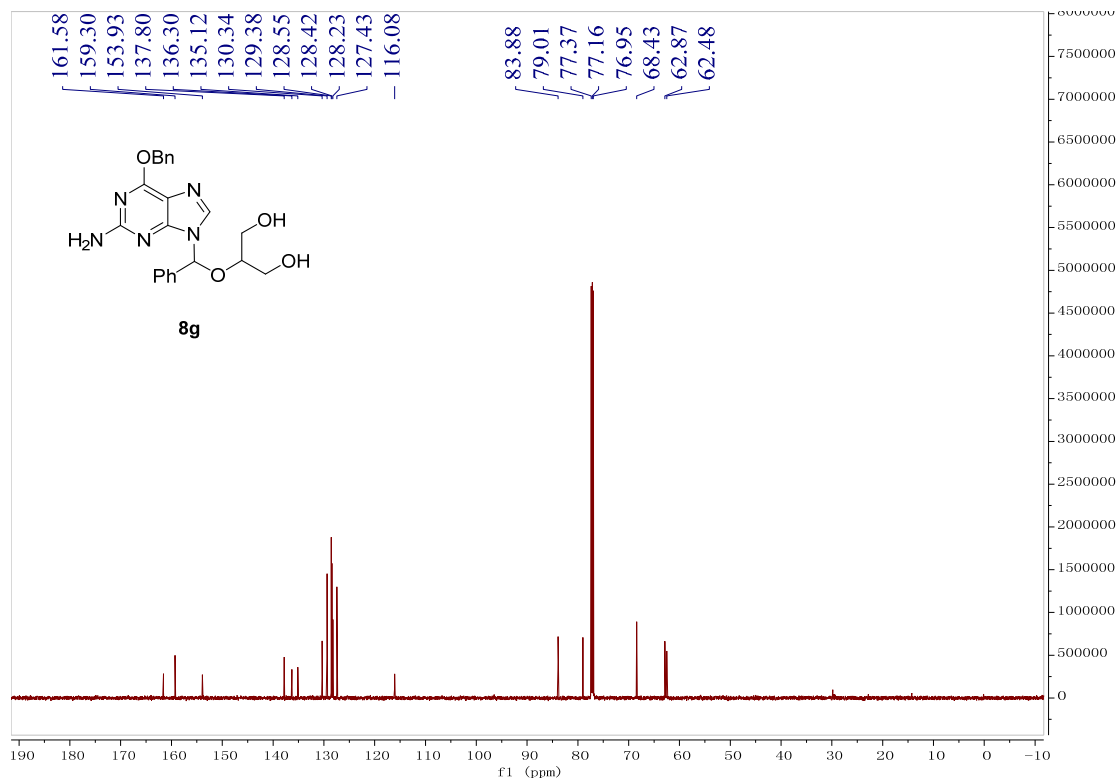

### <sup>1</sup>H NMR (600 MHz, DMSO) for 9g

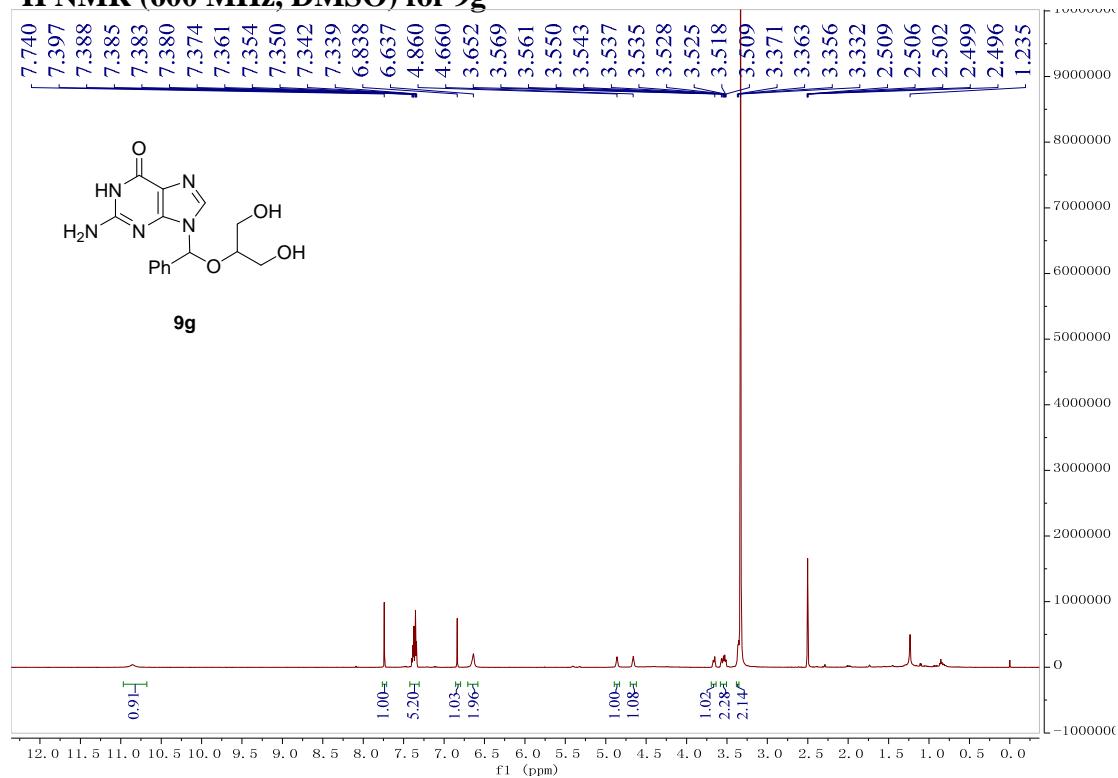

### <sup>13</sup>C NMR (150 MHz, DMSO) for 9g

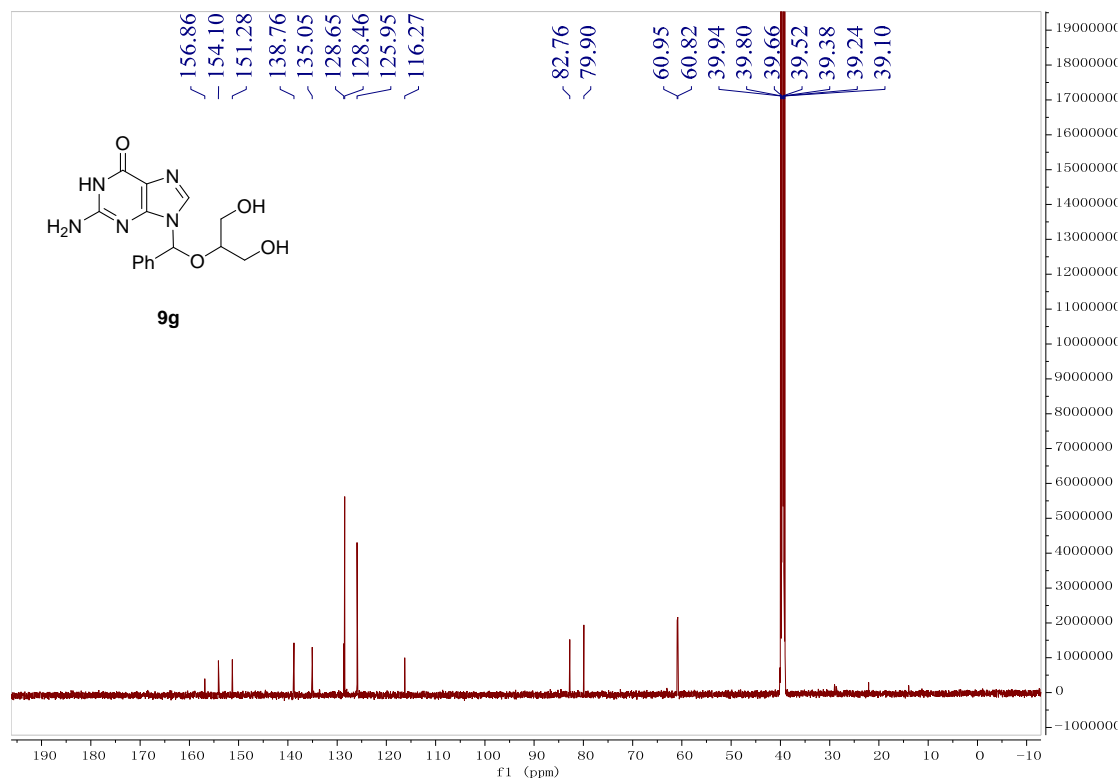

### <sup>1</sup>H NMR (600 MHz, CDCl<sub>3</sub>) for 10a

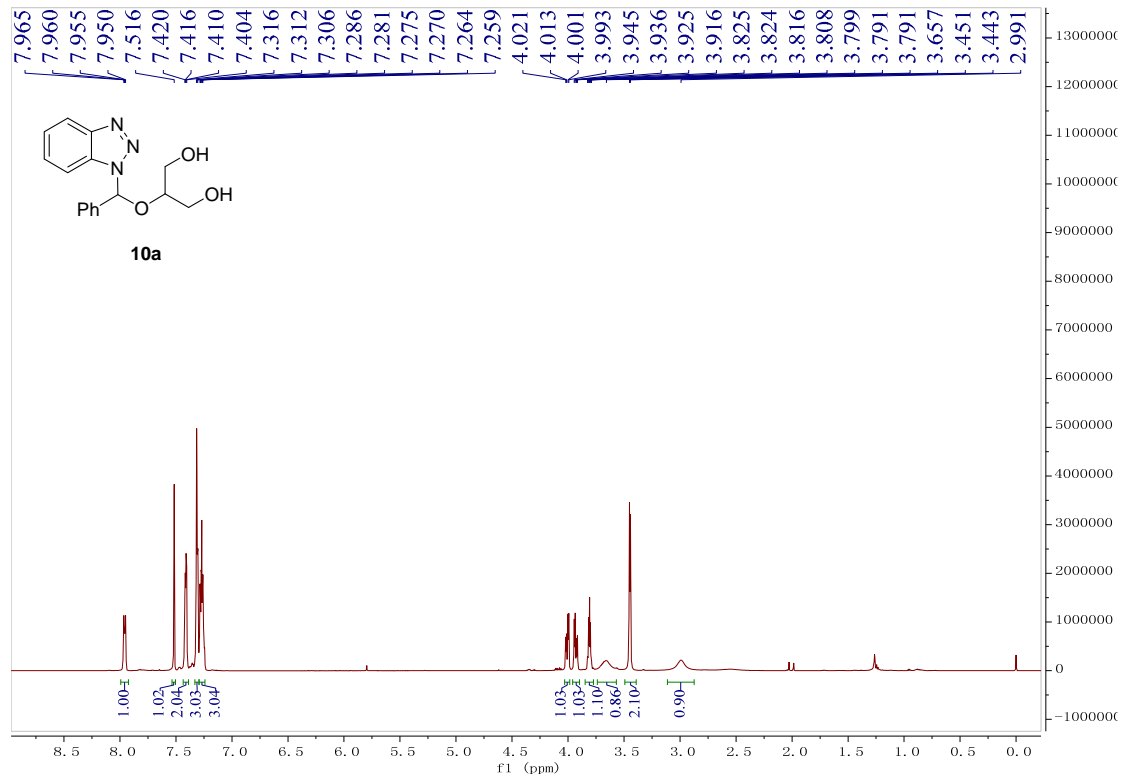

### <sup>13</sup>C NMR (150 MHz, CDCl<sub>3</sub>) for 10a

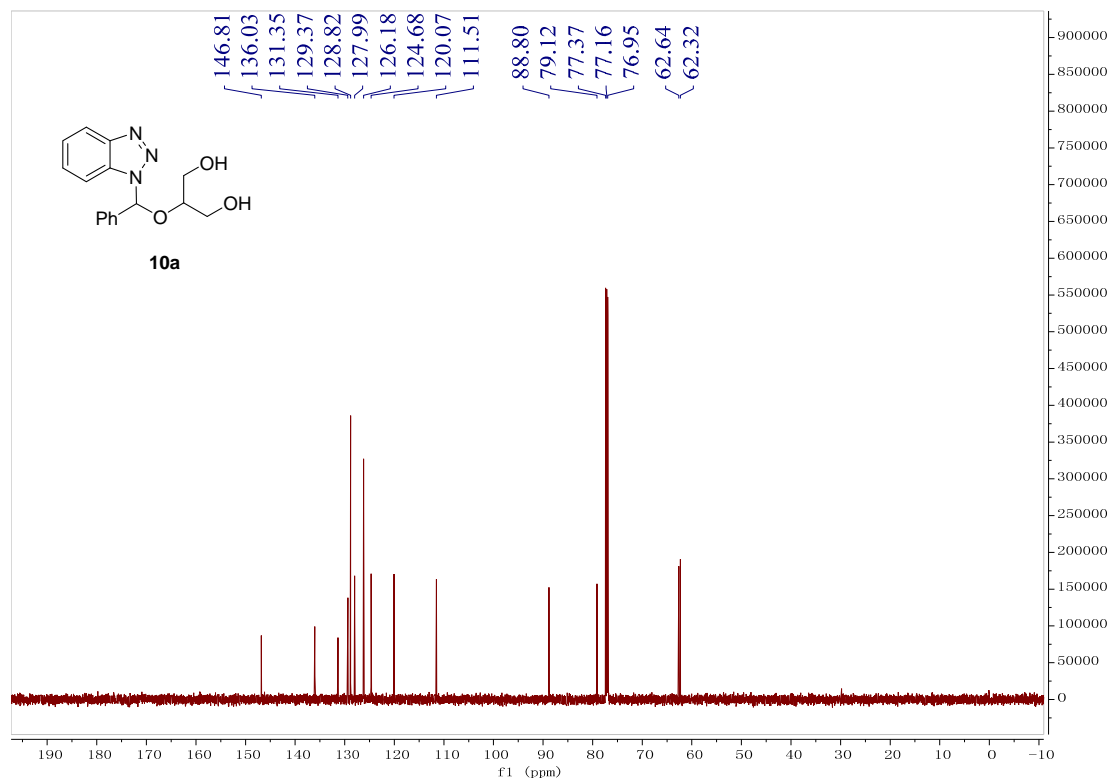



### <sup>1</sup>H NMR (400 MHz, CDCl<sub>3</sub>) for 11a

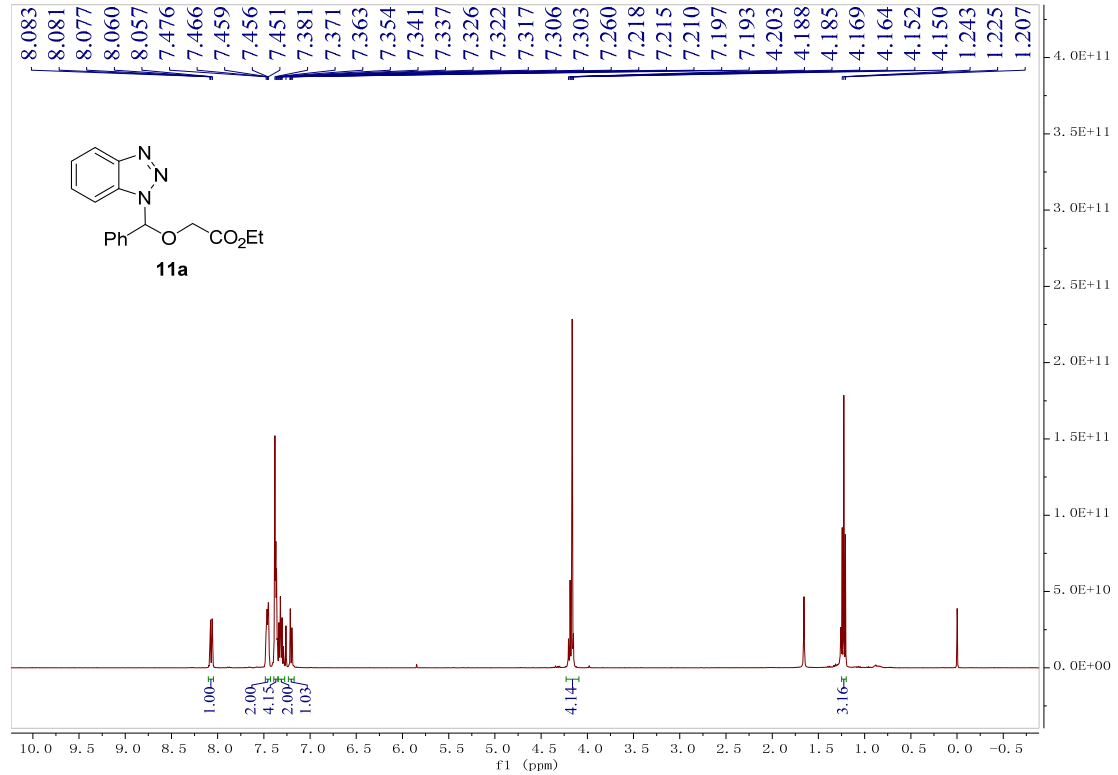

### <sup>13</sup>C NMR (100 MHz, CDCl<sub>3</sub>) for 11a

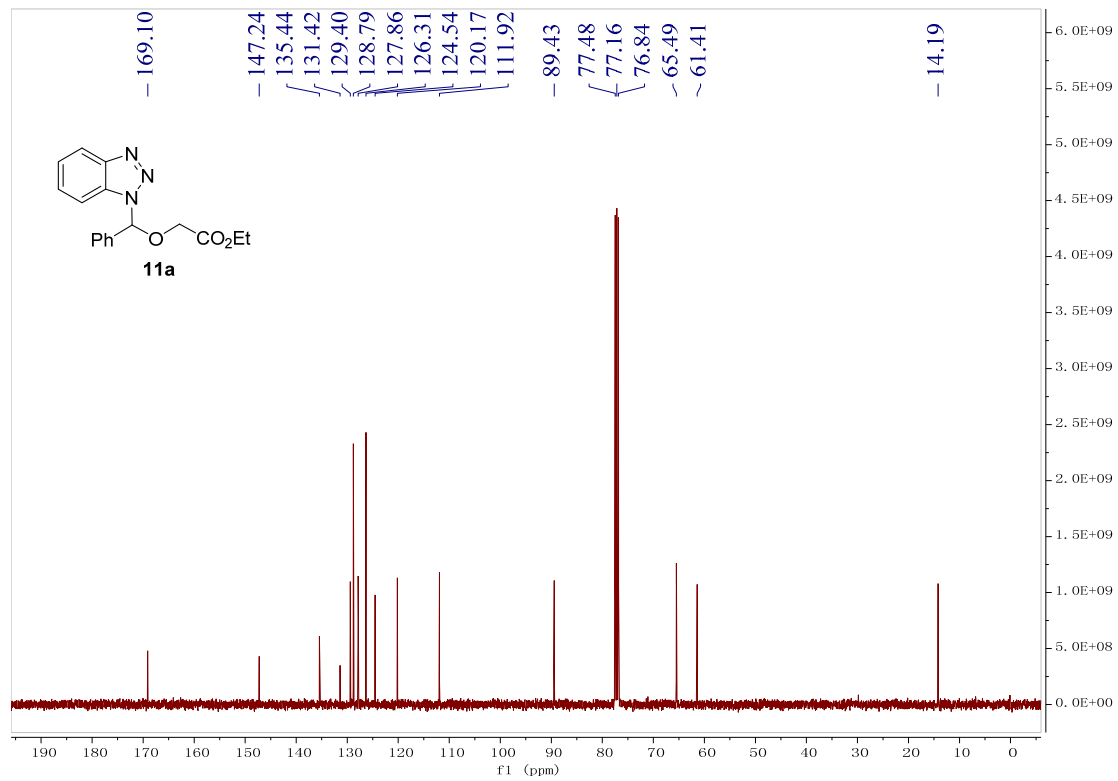

### <sup>1</sup>H NMR (400 MHz, CDCl<sub>3</sub>) for 12a

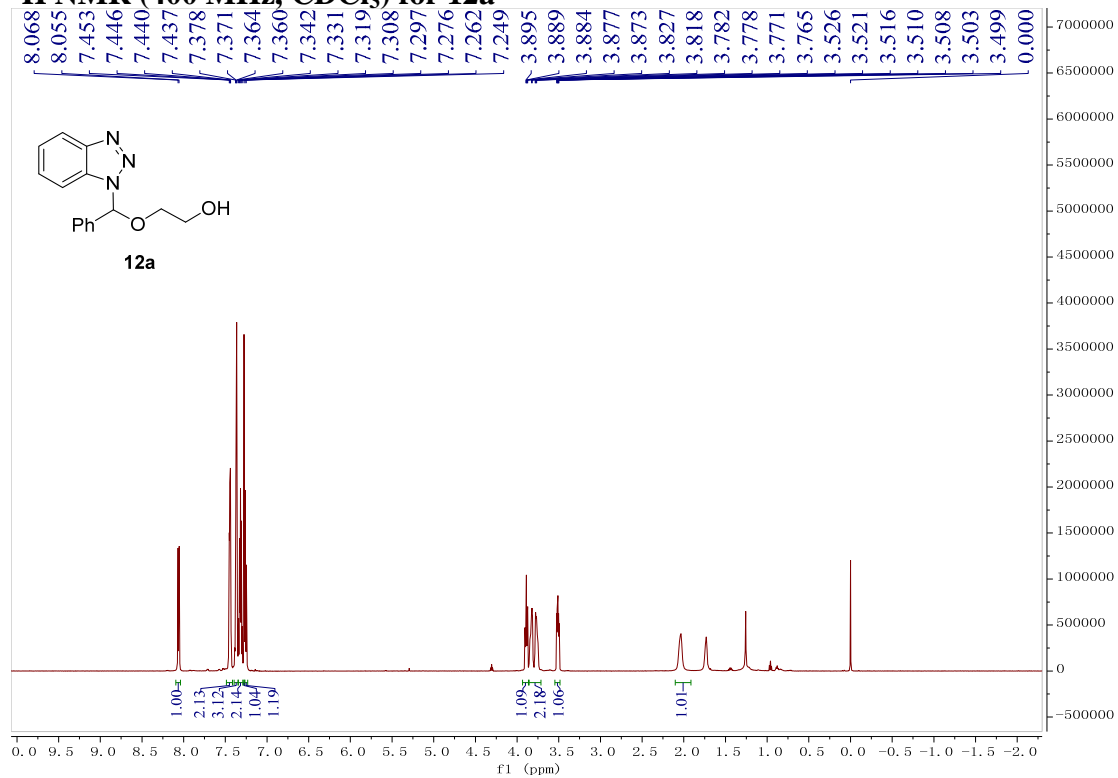

### <sup>13</sup>C NMR (100 MHz, CDCl<sub>3</sub>) for 12a

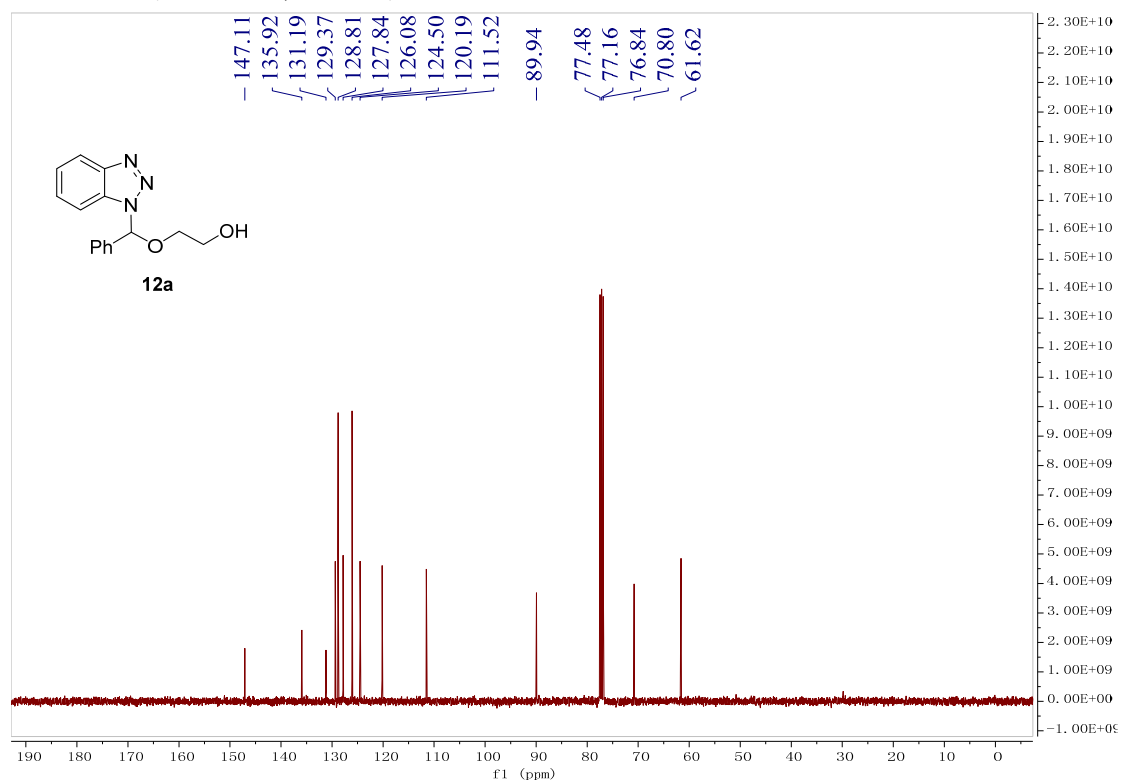

**<sup>1</sup>H NMR (400 MHz, CDCl<sub>3</sub>) for 13a**

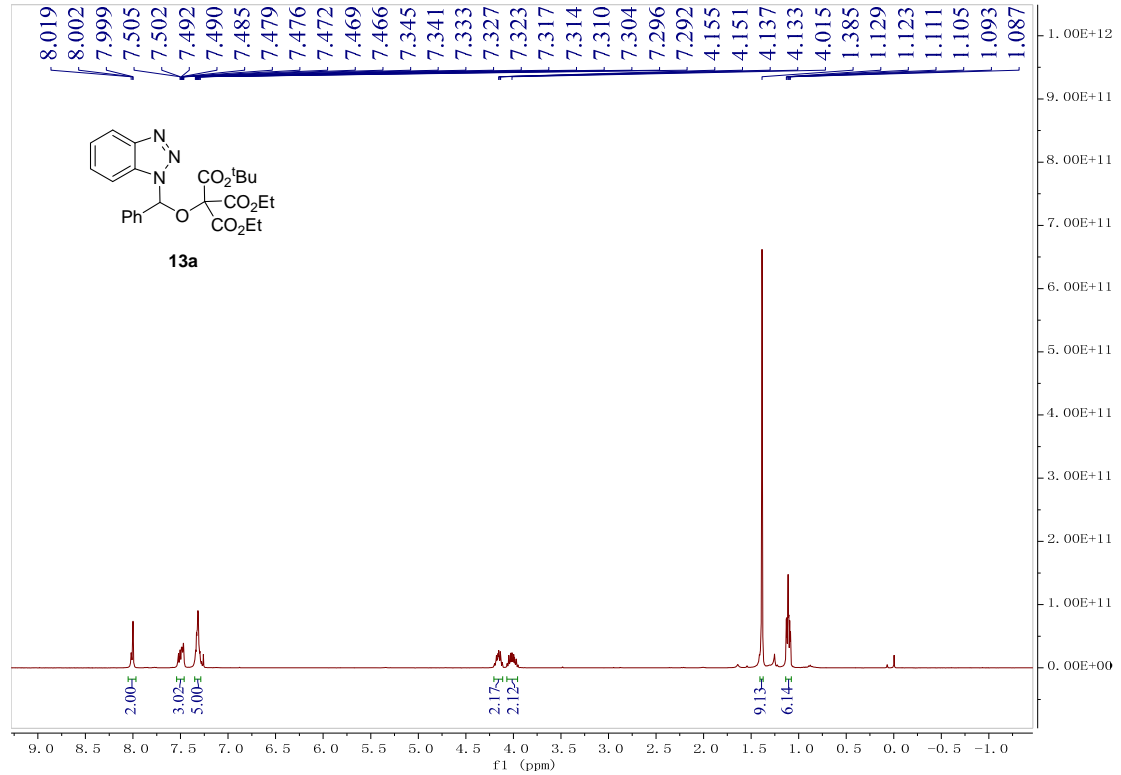

**<sup>13</sup>C NMR (100 MHz, CDCl<sub>3</sub>) for 13a**

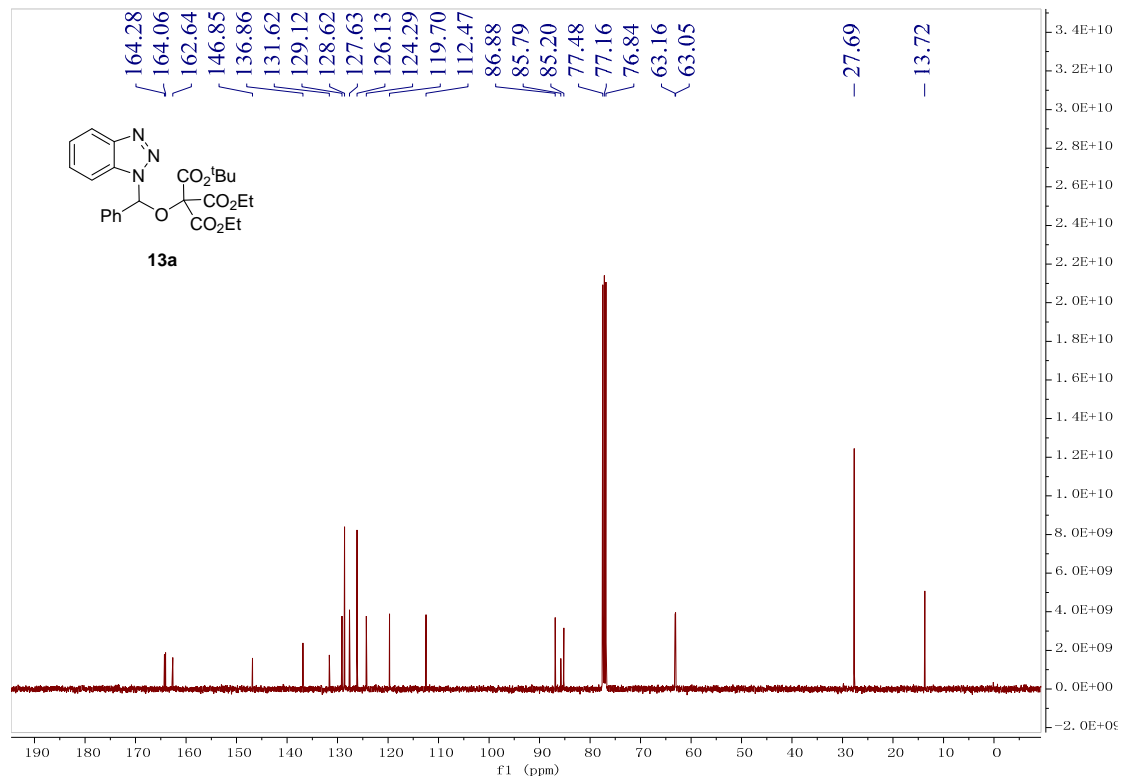

**$^1\text{H}$  NMR (400 MHz,  $\text{CDCl}_3$ ) for 14a**

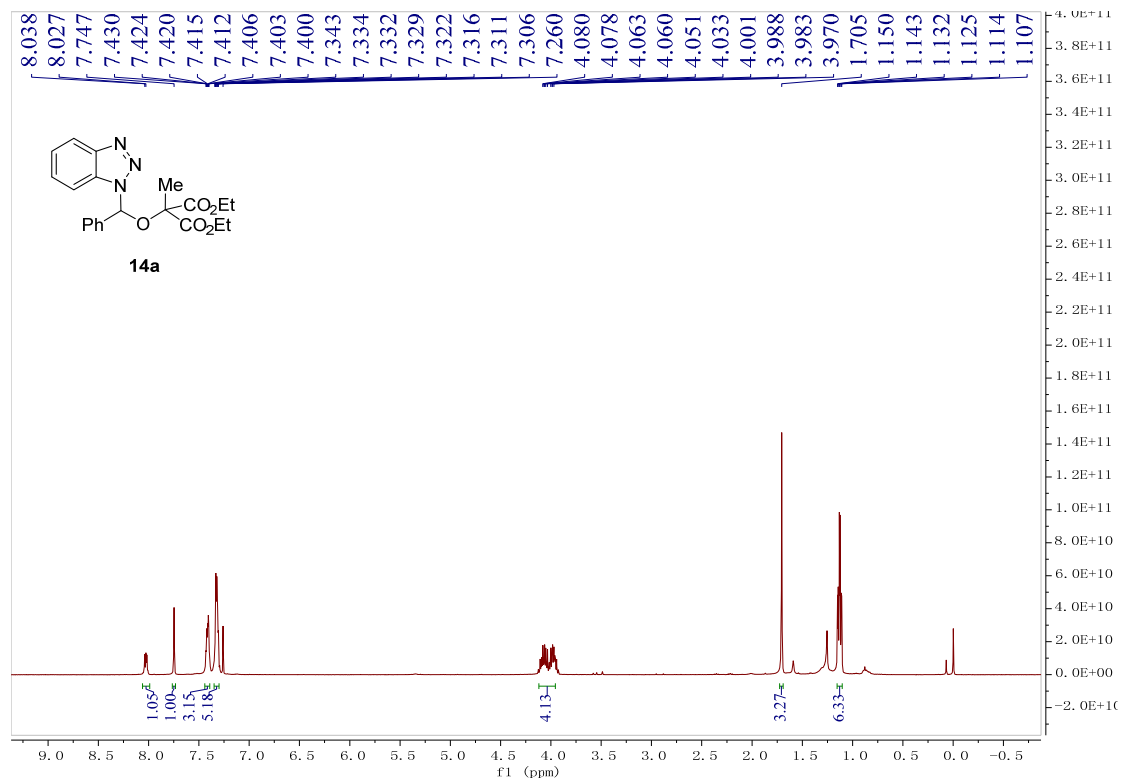

**$^{13}\text{C}$  NMR (100 MHz,  $\text{CDCl}_3$ ) for 14a**

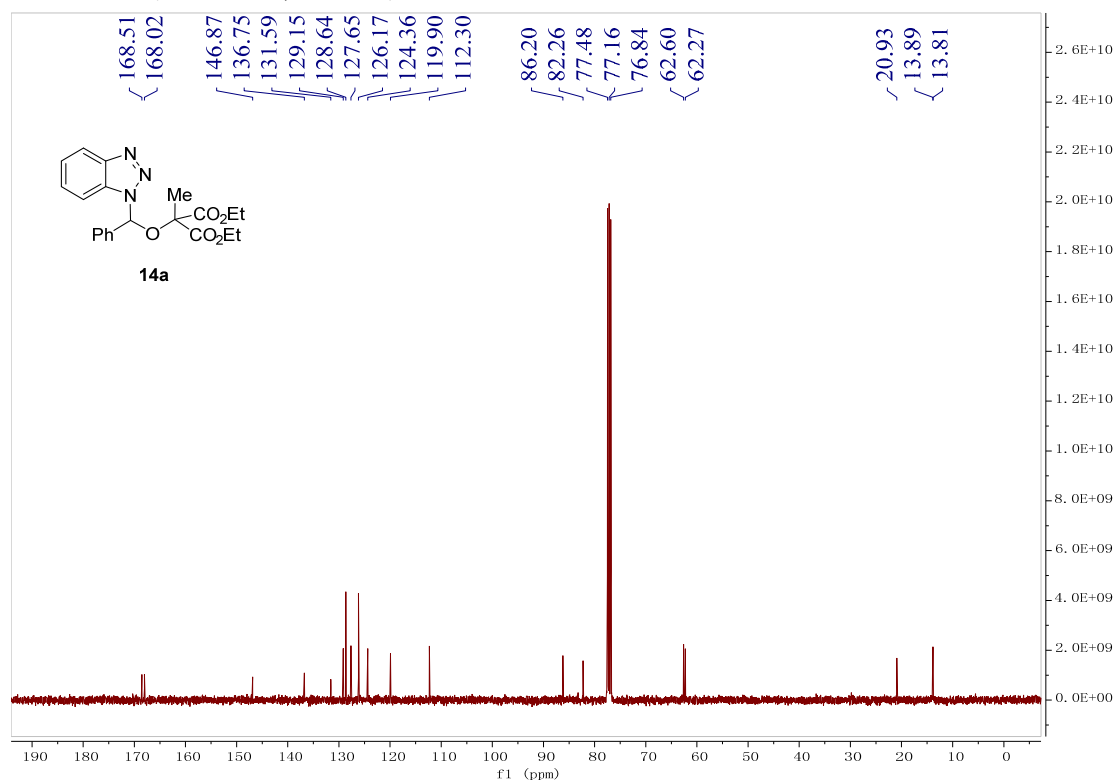

**<sup>1</sup>H NMR (400 MHz, CDCl<sub>3</sub>) for 15a**

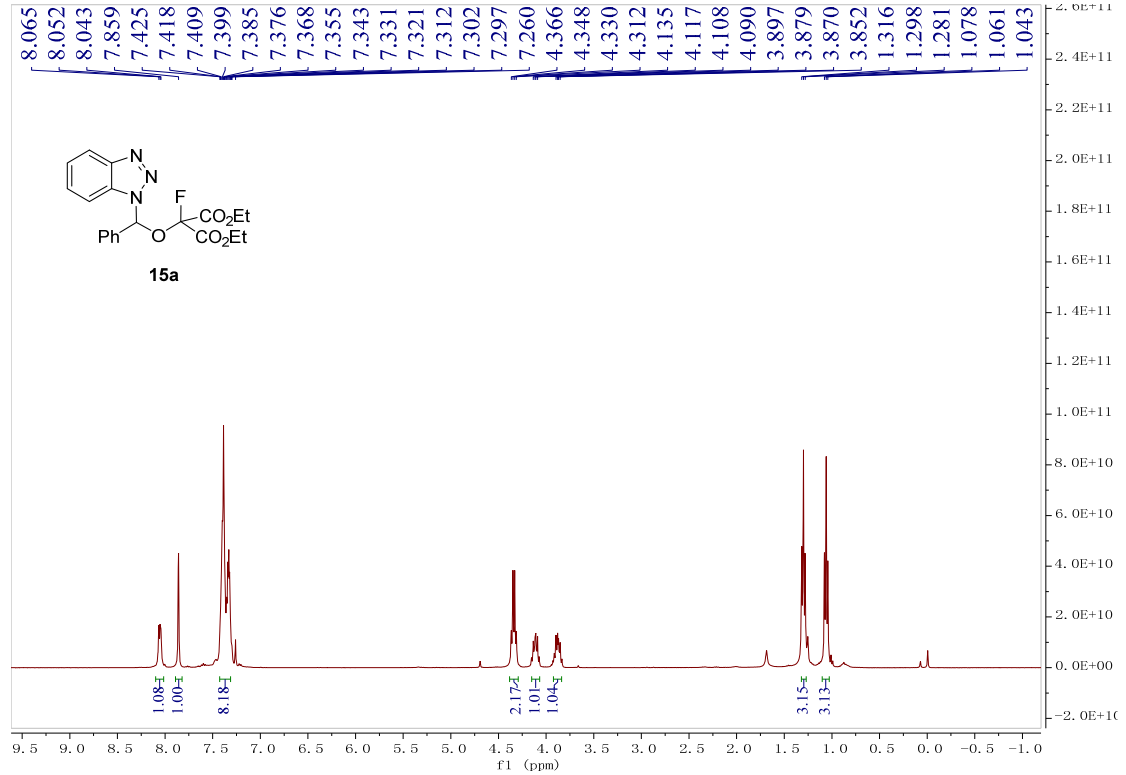

**<sup>13</sup>C NMR (150 MHz, CDCl<sub>3</sub>) for 15a**

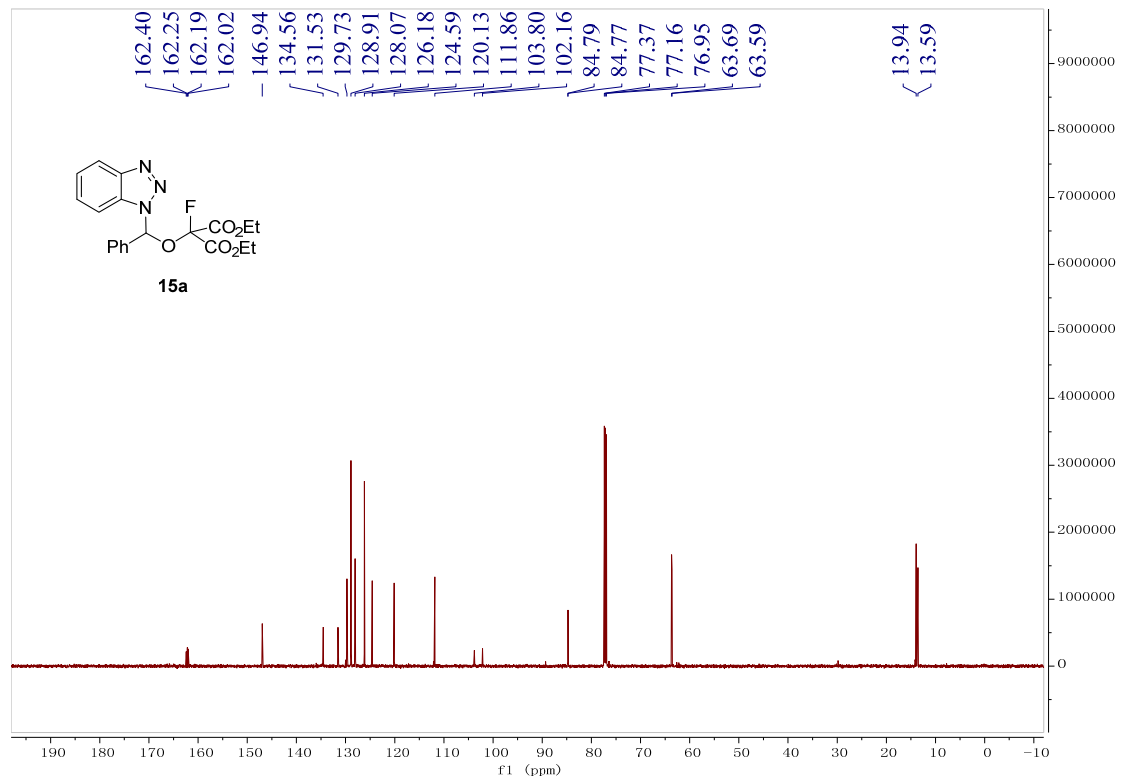

**<sup>19</sup>F NMR (376 MHz, CDCl<sub>3</sub>) for 15a**

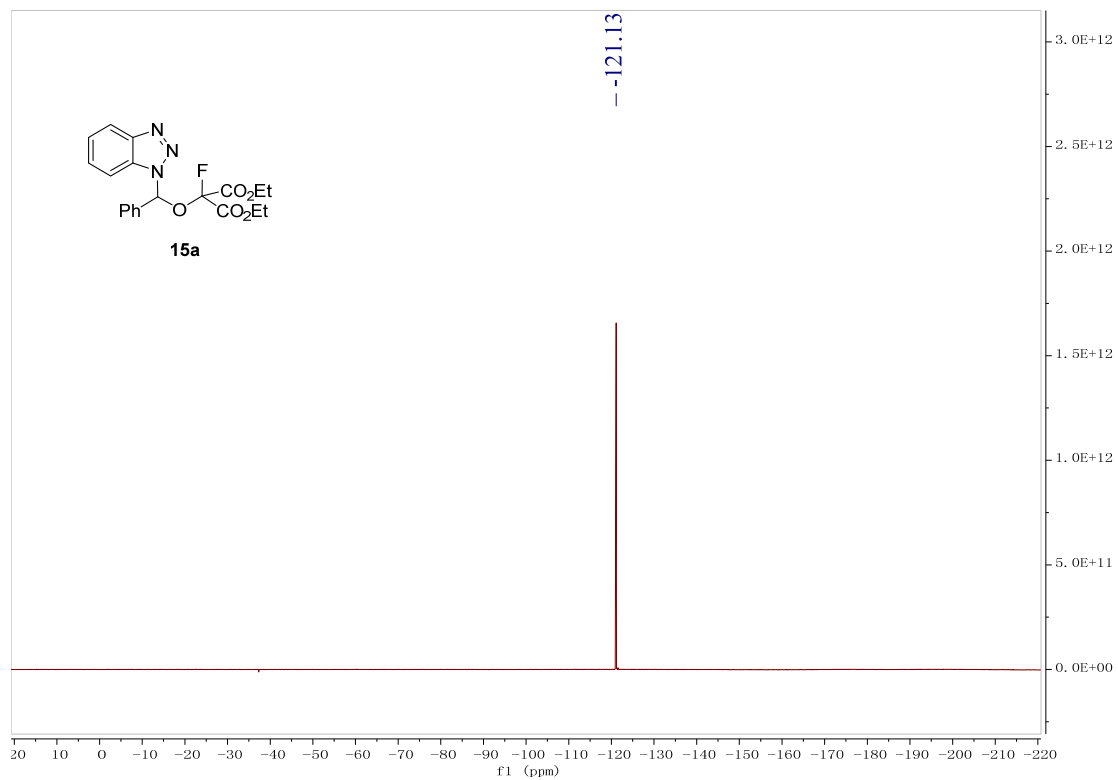

### $^1\text{H}$ NMR (600 MHz, $\text{CDCl}_3$ ) for 16a

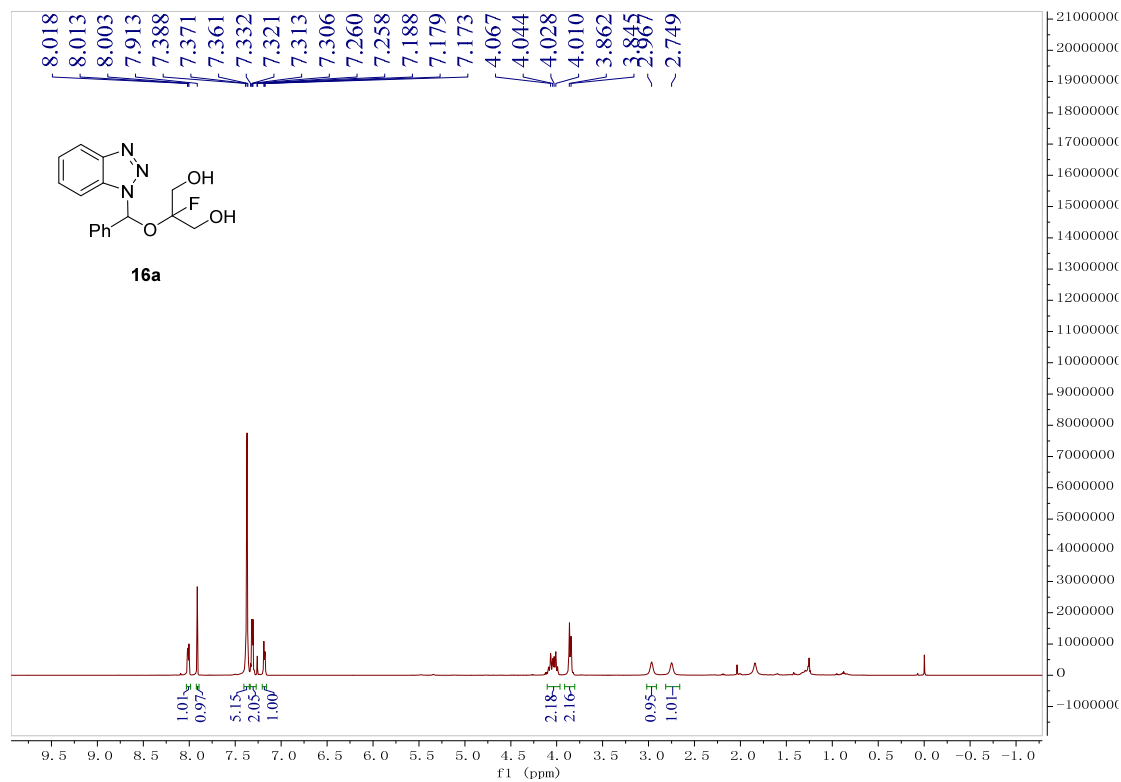

### $^{13}\text{C}$ NMR (150 MHz, $\text{CDCl}_3$ ) for 16a

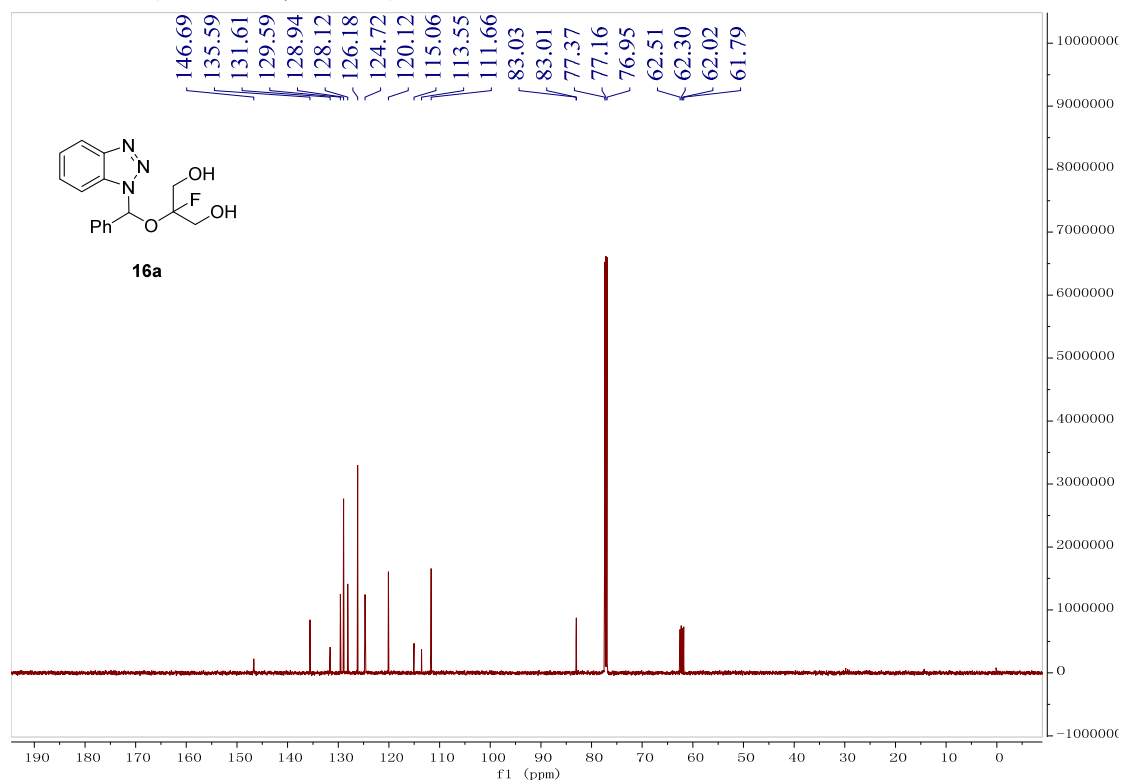

**<sup>19</sup>F NMR (565 MHz, CDCl<sub>3</sub>) for 16a**

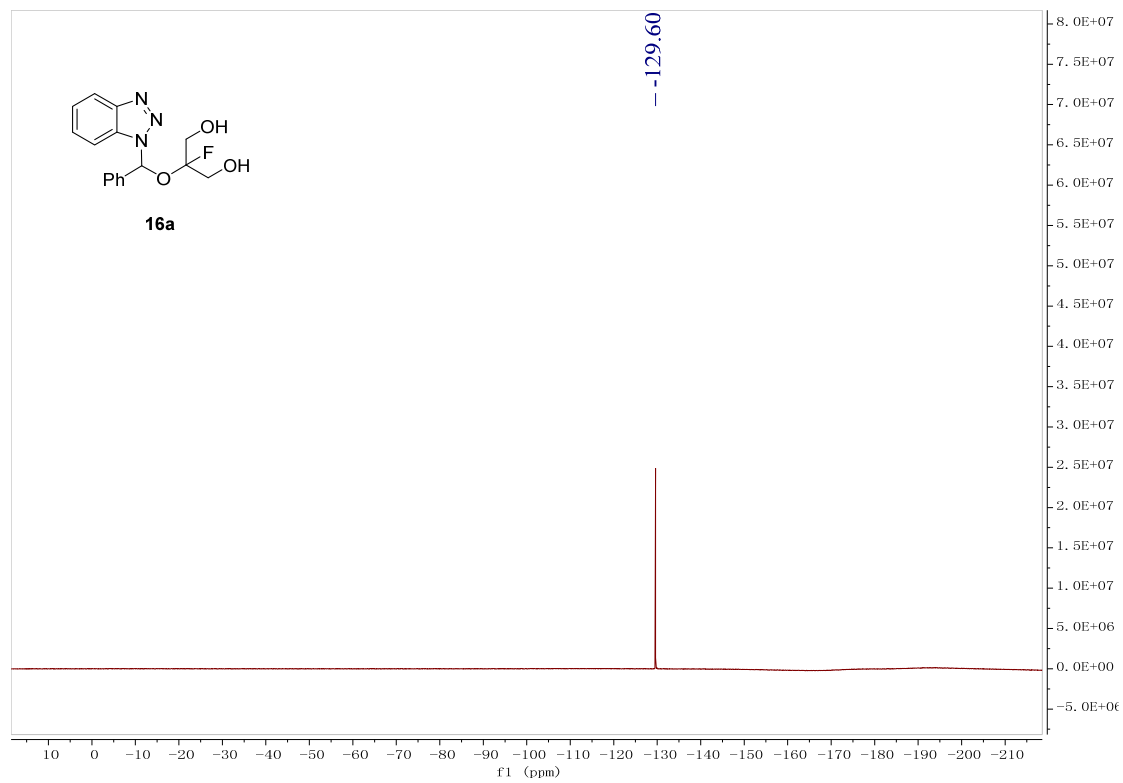



## 16. Crude $^1\text{H}$ NMR data

### $^1\text{H}$ NMR of mixed **3a**, **4a** and **5a**

the characteristic peak in the mixture: **3a** (s,  $\delta$  4.62), **4a** (s,  $\delta$  4.60), **5a** (s,  $\delta$  6.87).

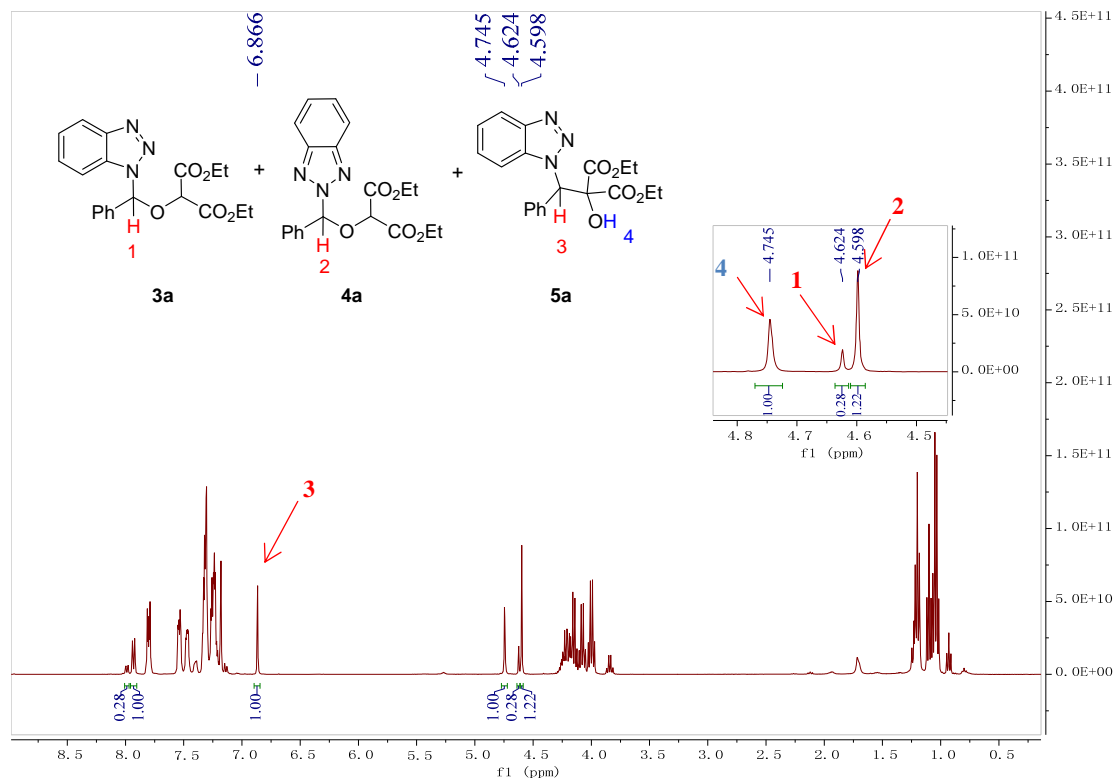

### Crude $^1\text{H}$ NMR of the standard reaction, ratio of $N^I/N^2 = 96:4$

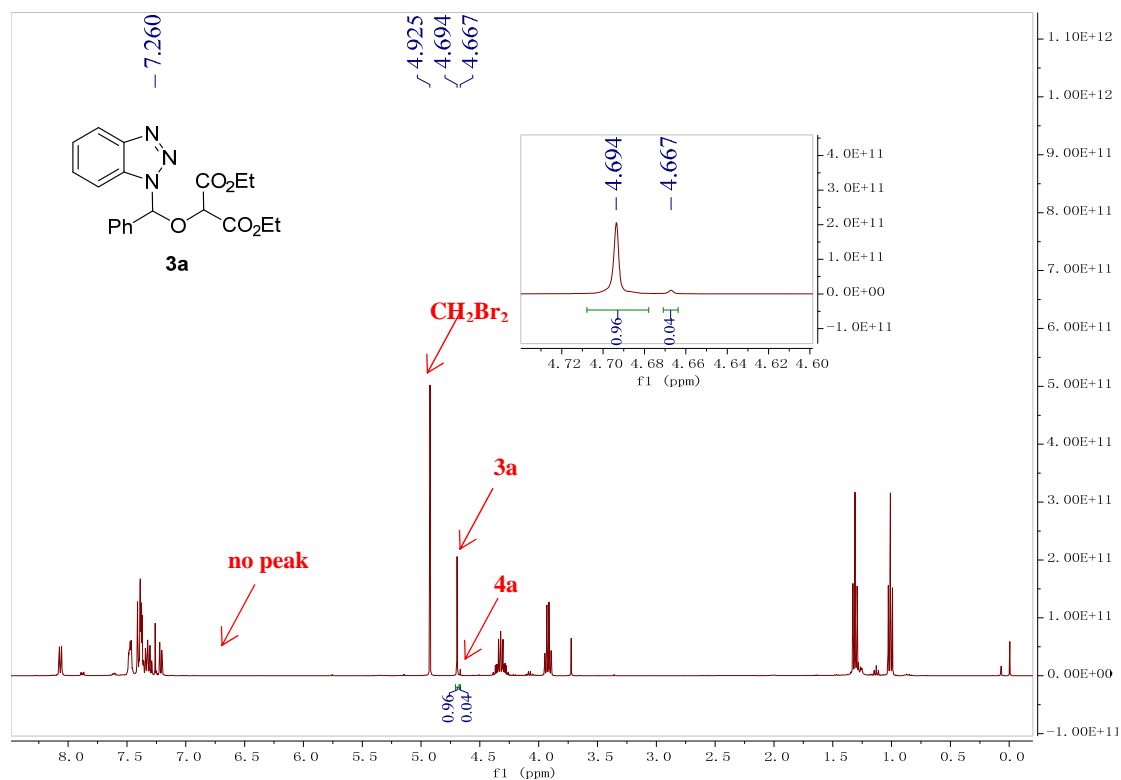

### Crude <sup>1</sup>H NMR of 3b

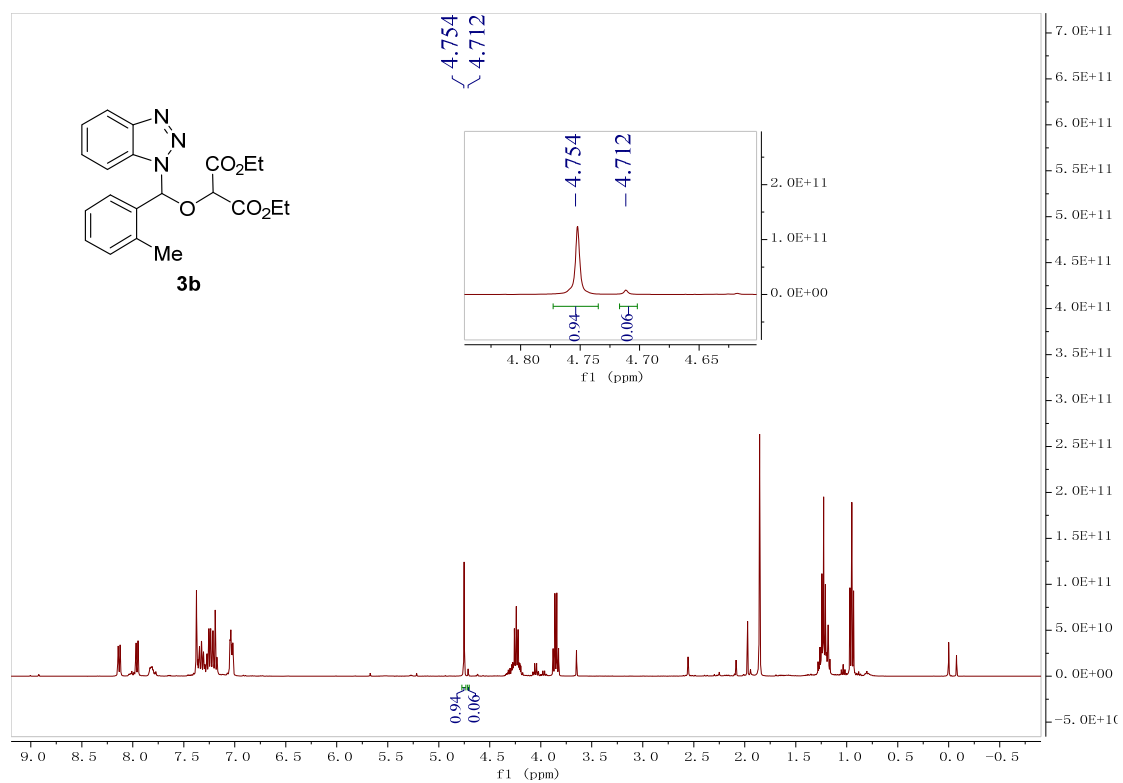

### Crude <sup>1</sup>H NMR of 3c

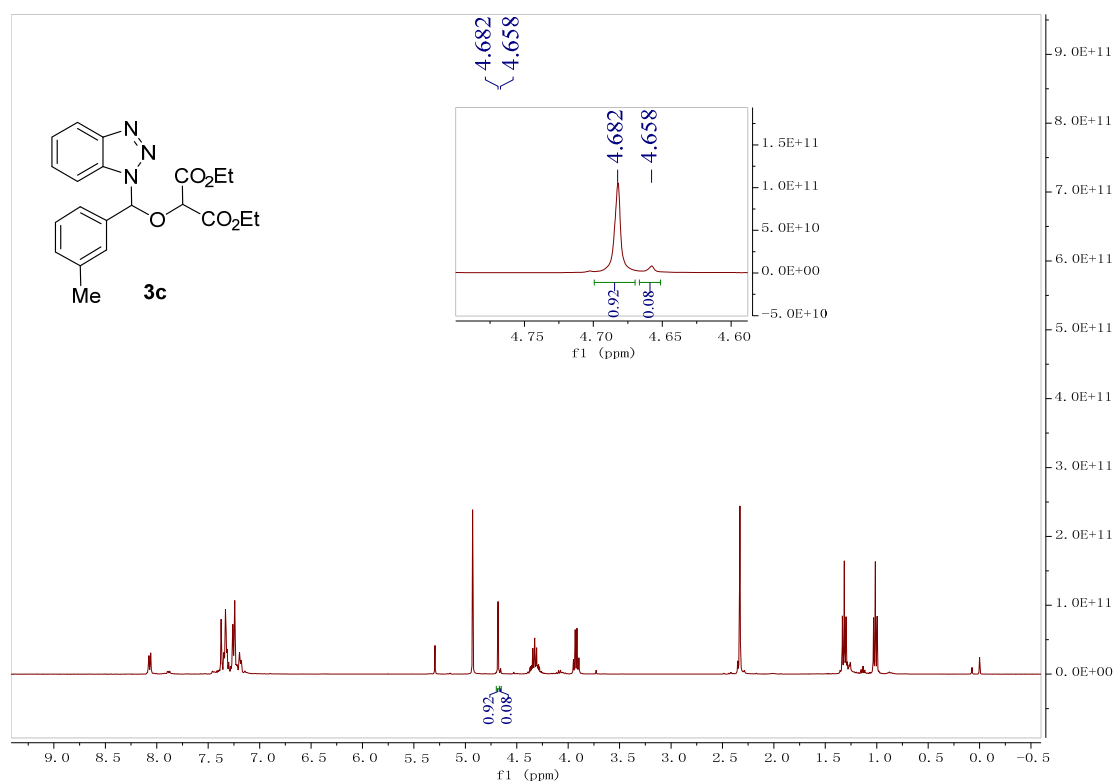

### Crude <sup>1</sup>H NMR of 3d

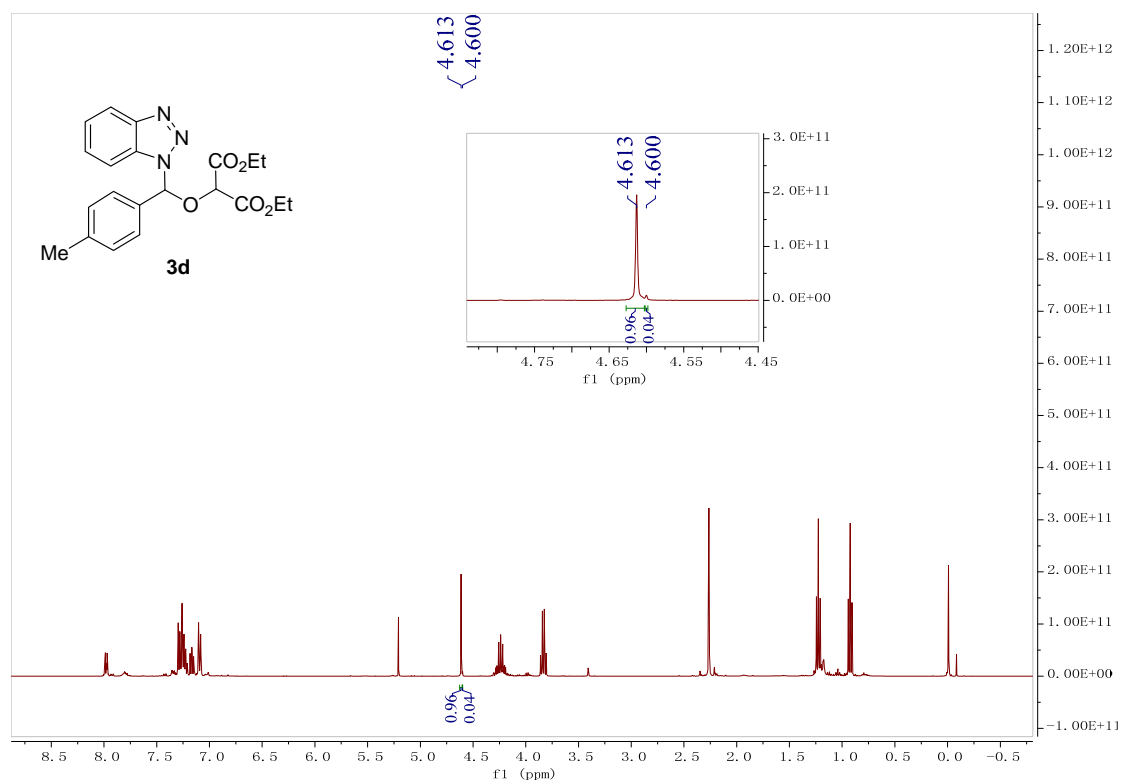

### Crude <sup>1</sup>H NMR of 3e

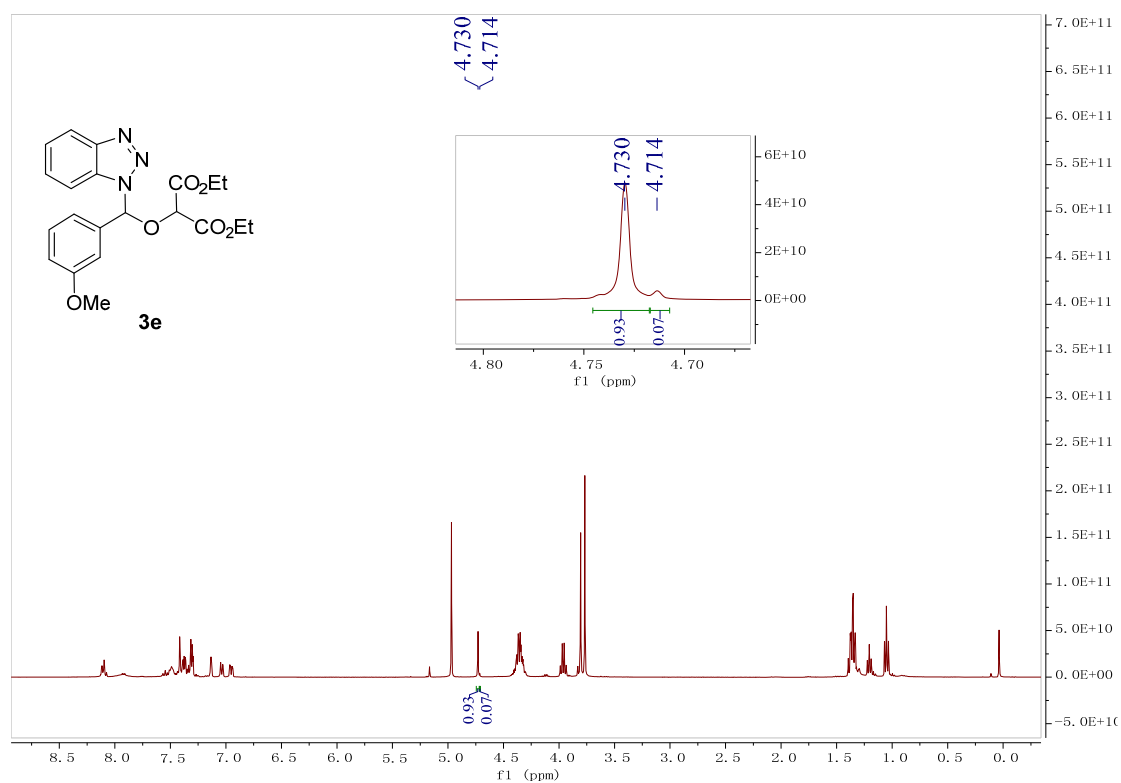

### Crude <sup>1</sup>H NMR of 3f

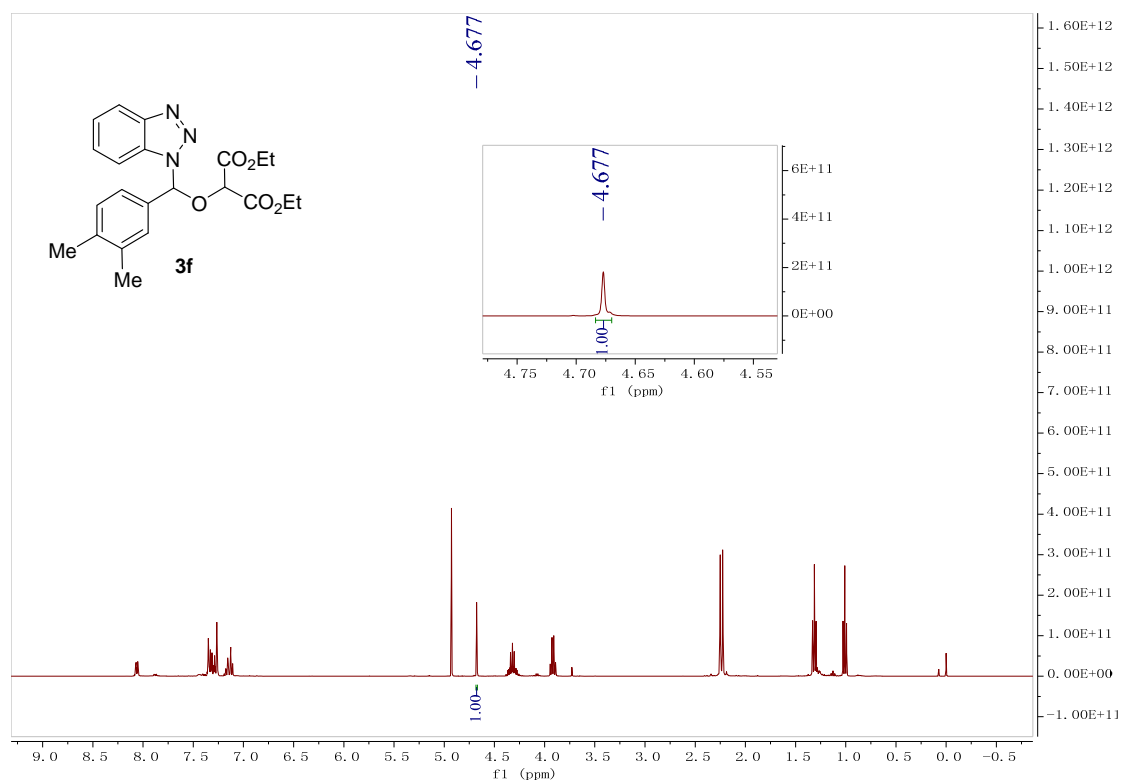

### Crude <sup>1</sup>H NMR of 3g

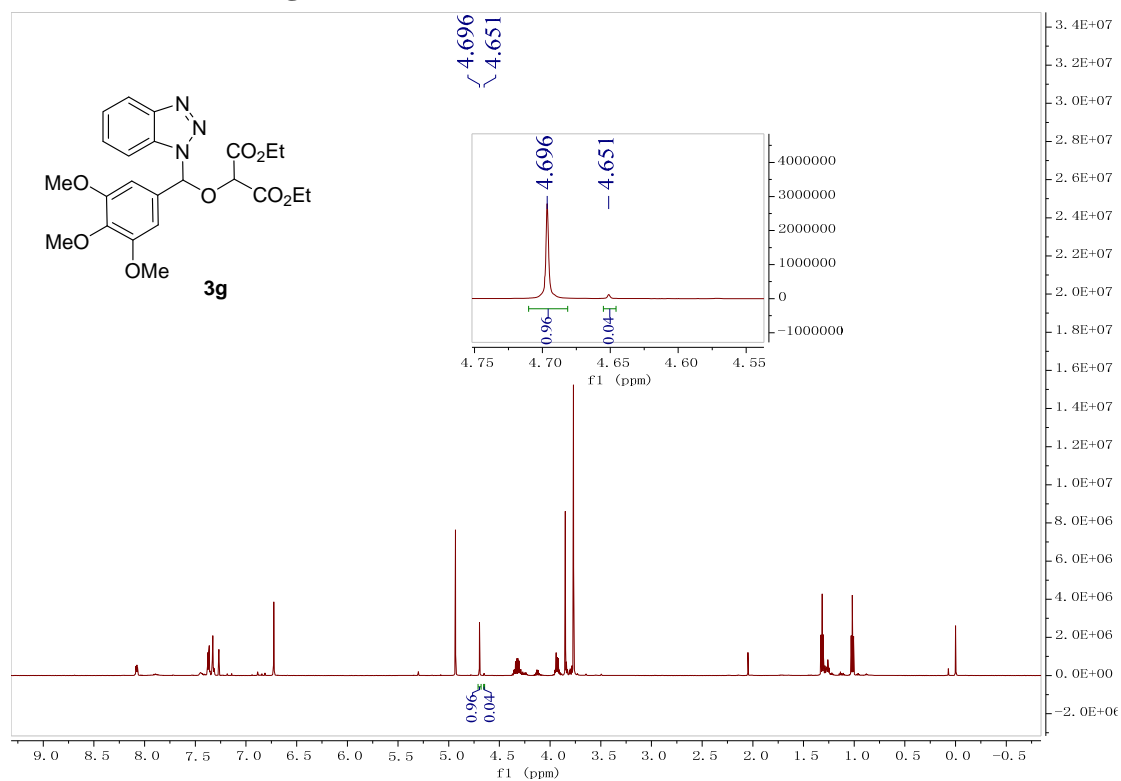

### Crude <sup>1</sup>H NMR of 3h

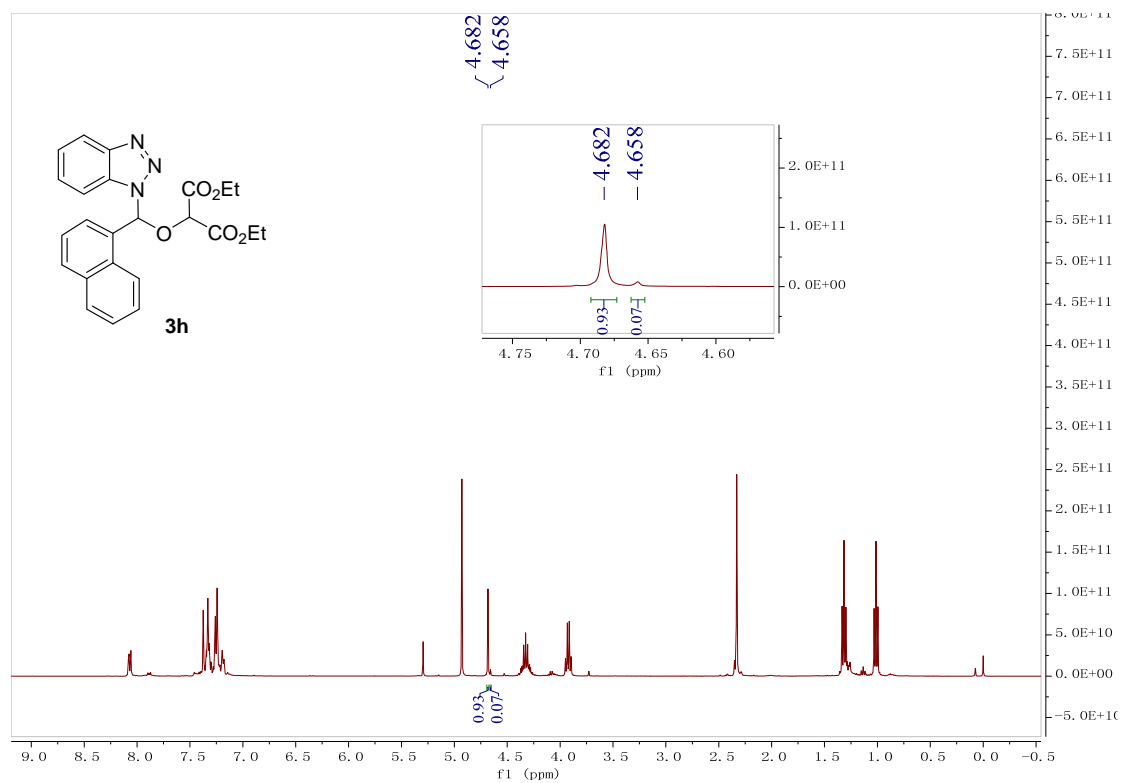

### Crude <sup>1</sup>H NMR of 3i

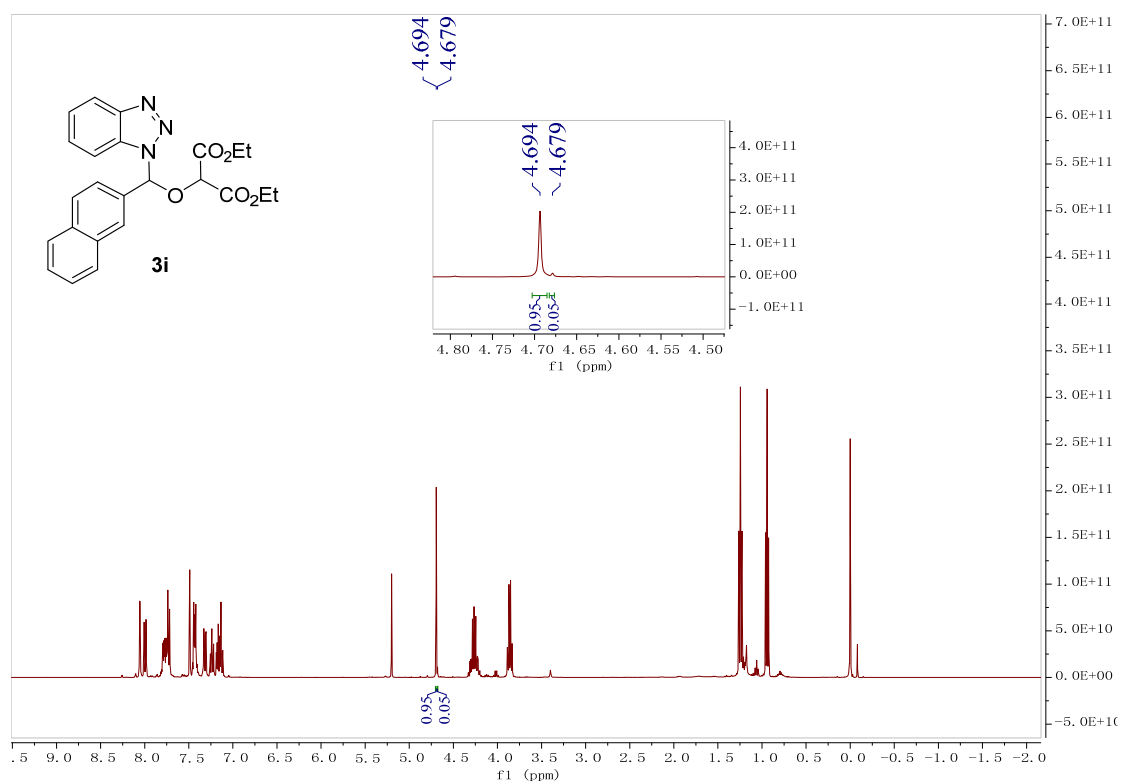

### Crude <sup>1</sup>H NMR of 3j

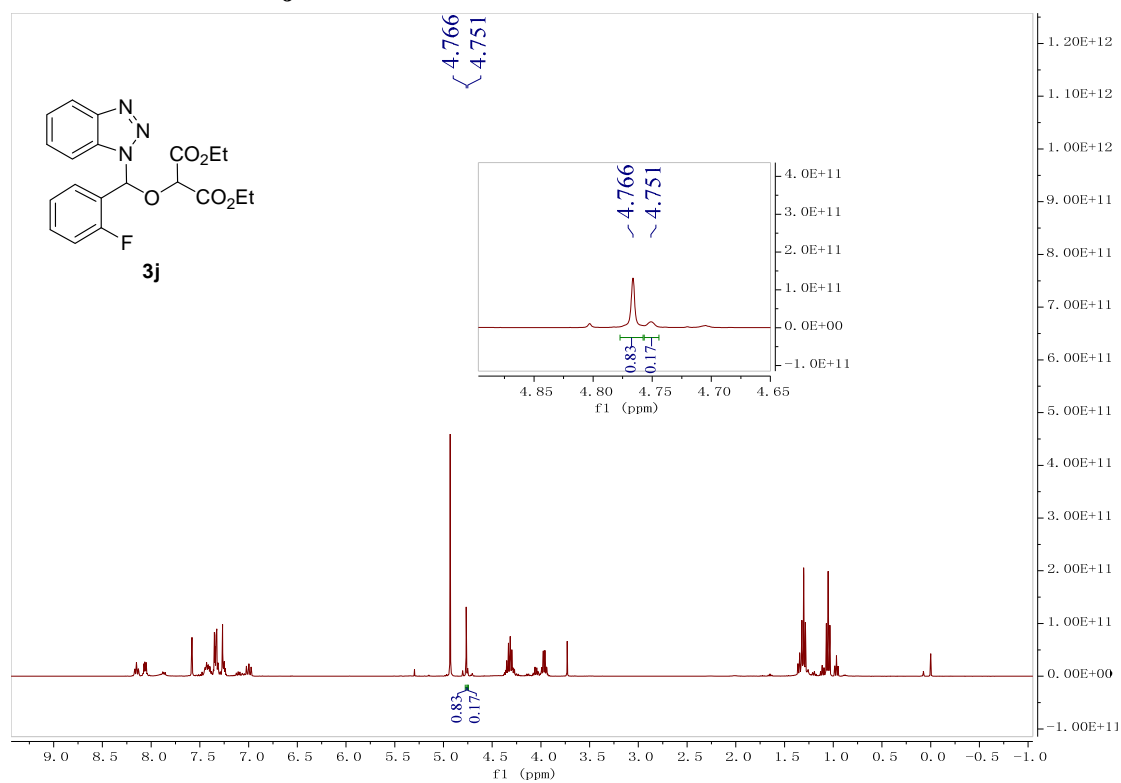

### Crude <sup>1</sup>H NMR of 3k

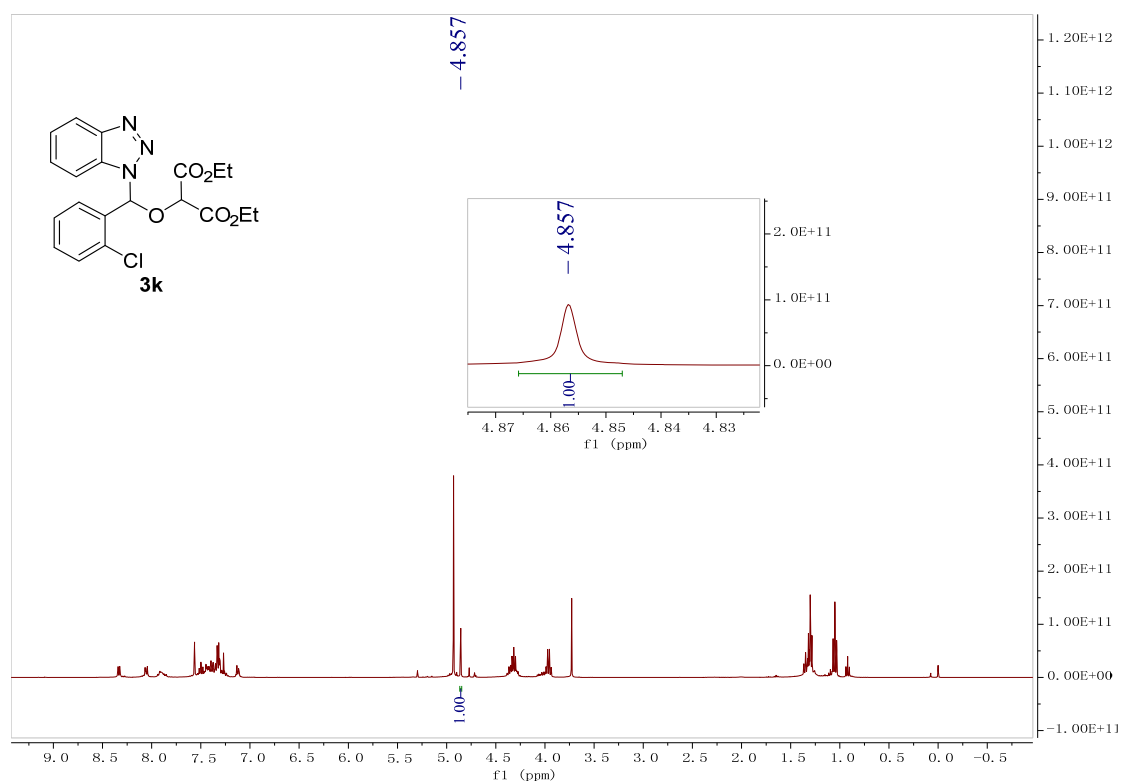

### Crude <sup>1</sup>H NMR of 3l

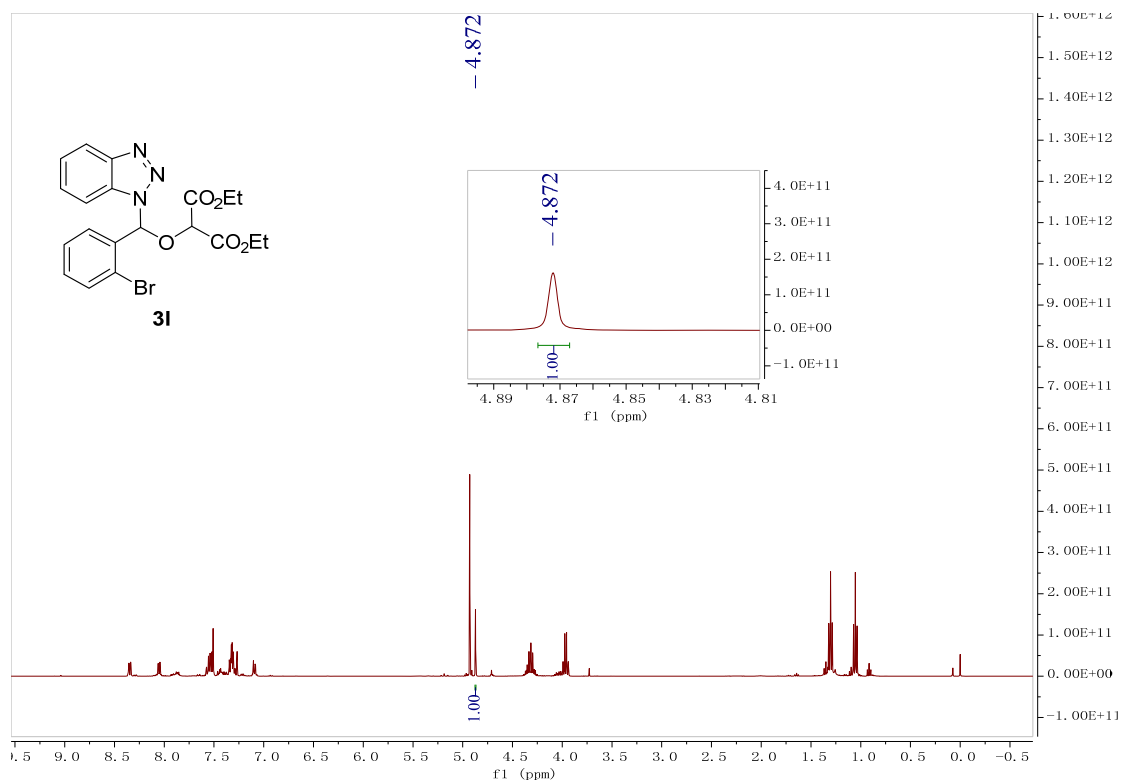

### Crude <sup>1</sup>H NMR of 3m

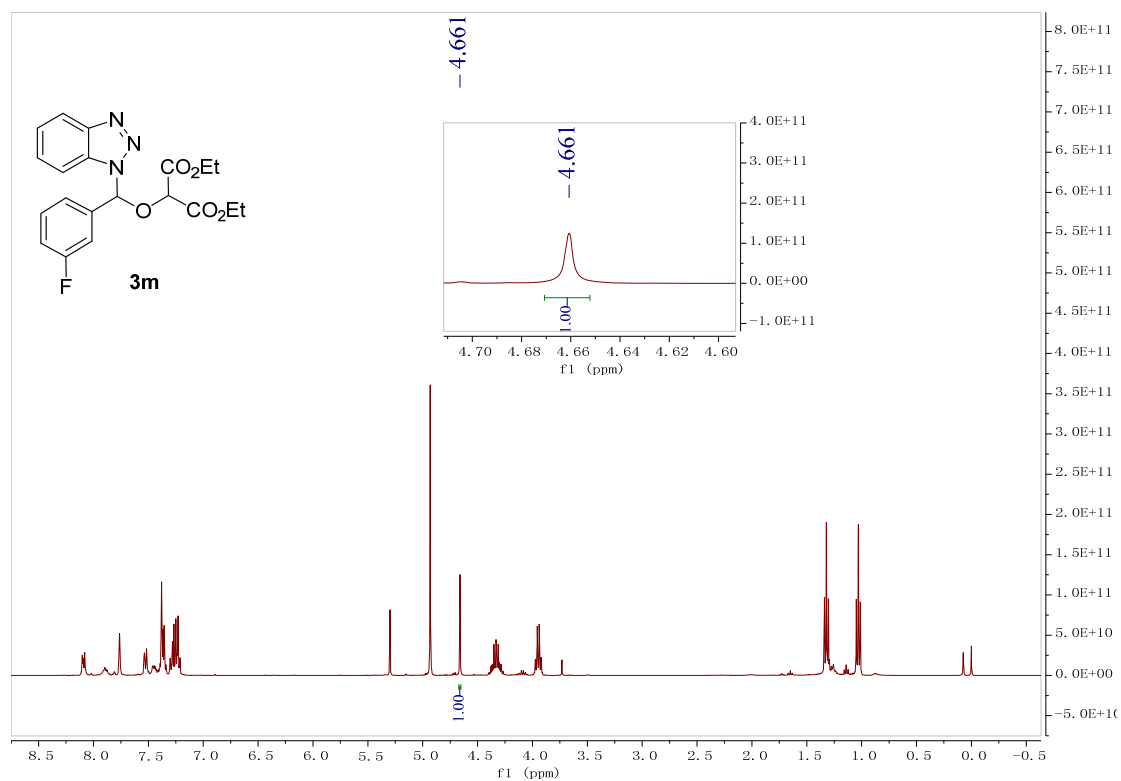

### Crude <sup>1</sup>H NMR of 3n

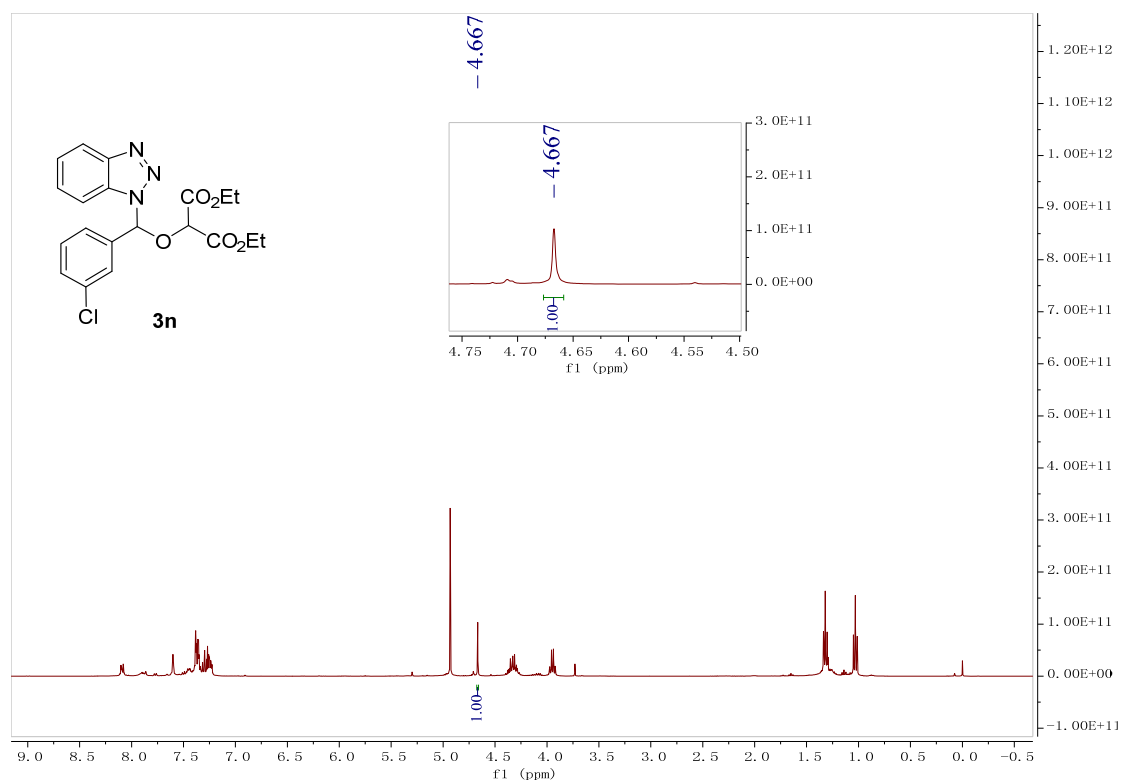

### Crude <sup>1</sup>H NMR of 3o

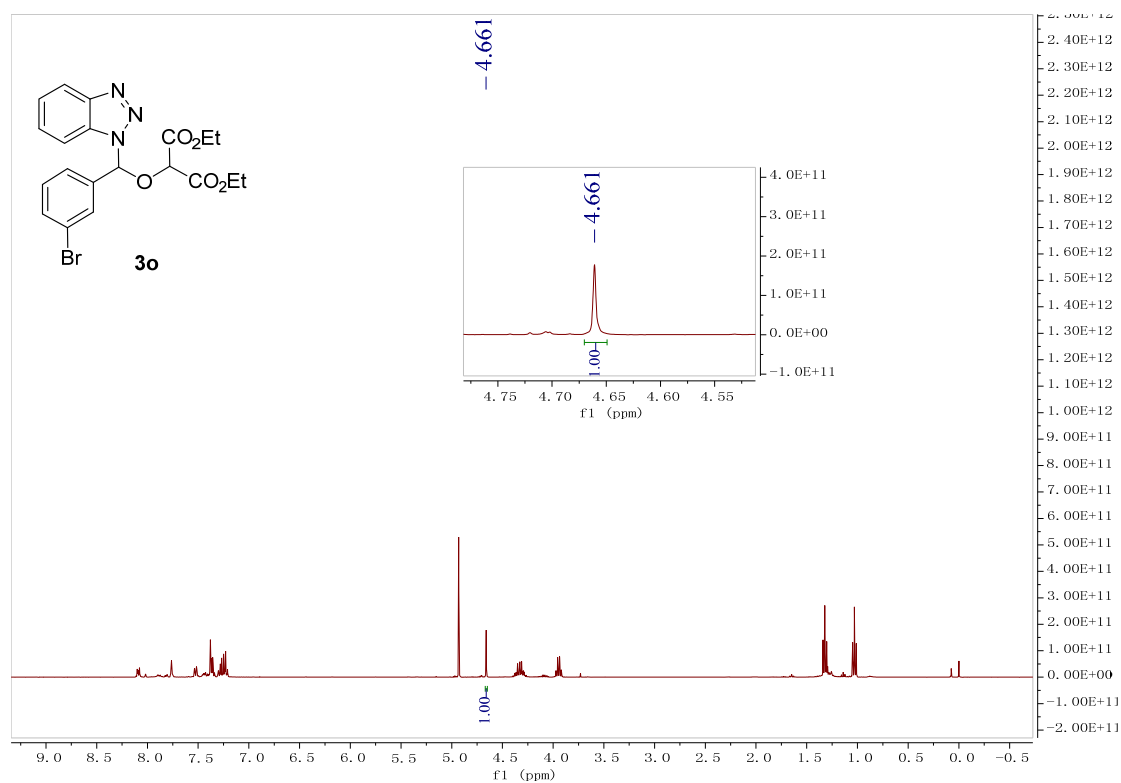



### Crude <sup>1</sup>H NMR of 3p

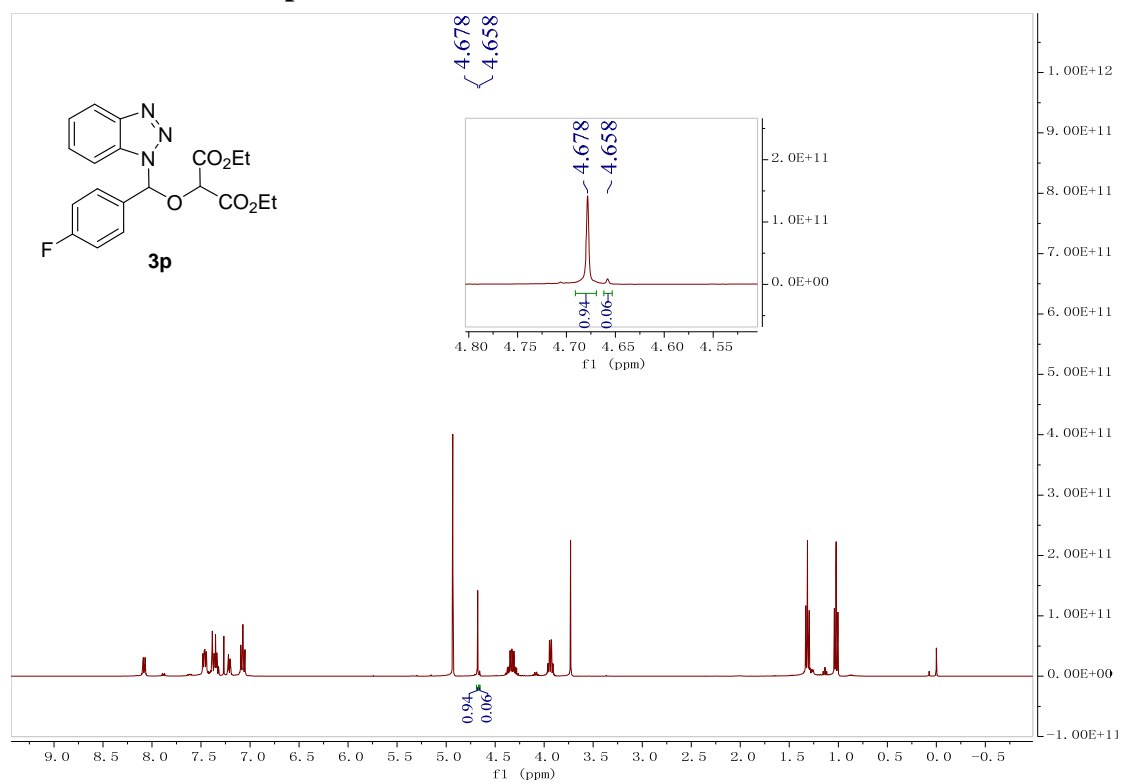

### Crude <sup>1</sup>H NMR of 3q

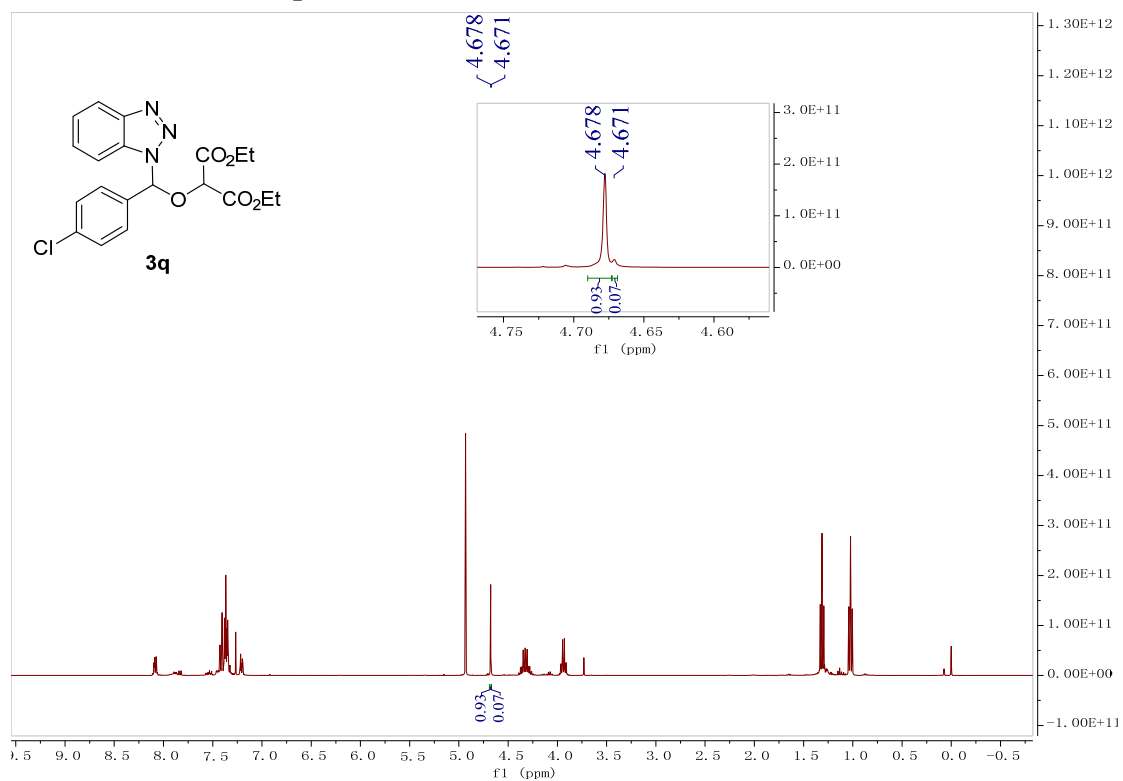

### Crude <sup>1</sup>H NMR of 3r

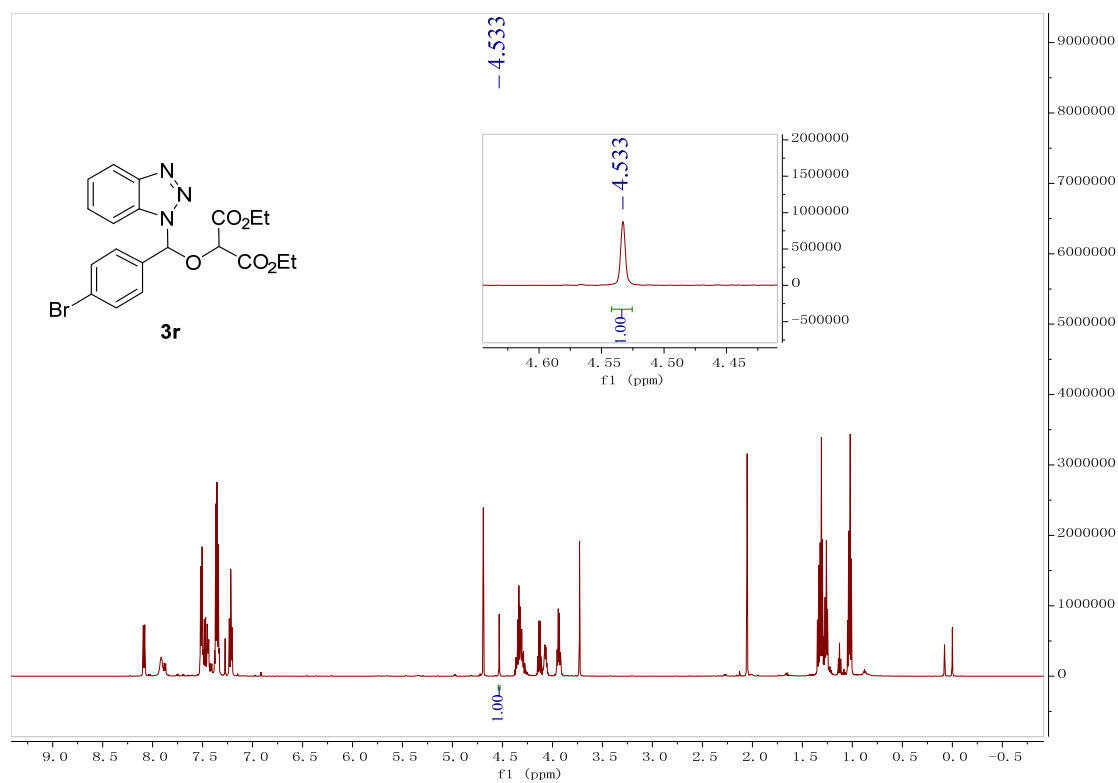

### Crude <sup>1</sup>H NMR of 3s

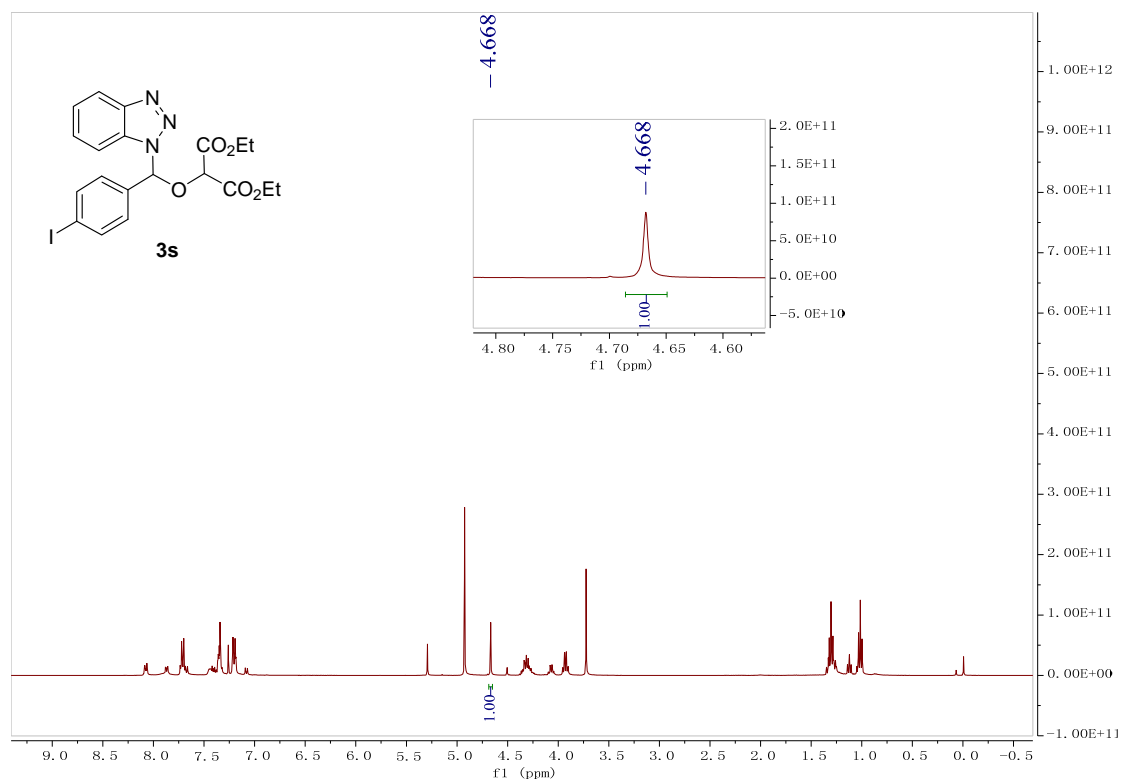

### Crude <sup>1</sup>H NMR of 3t

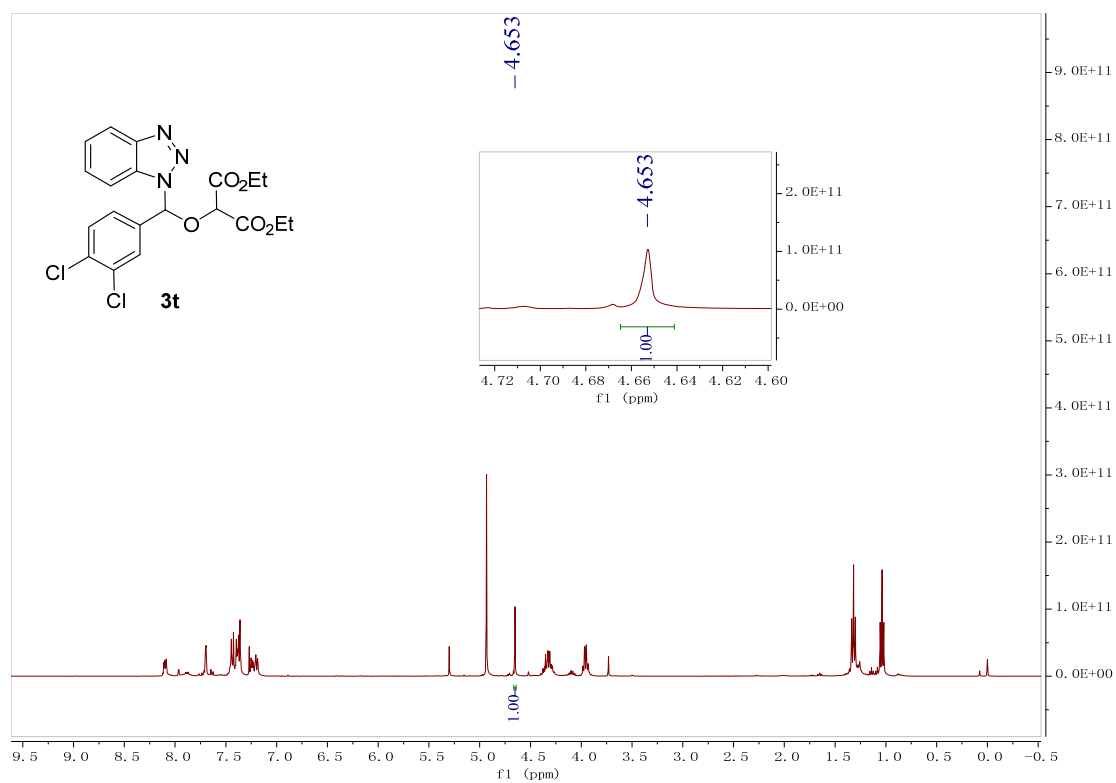

### Crude <sup>1</sup>H NMR of 3u

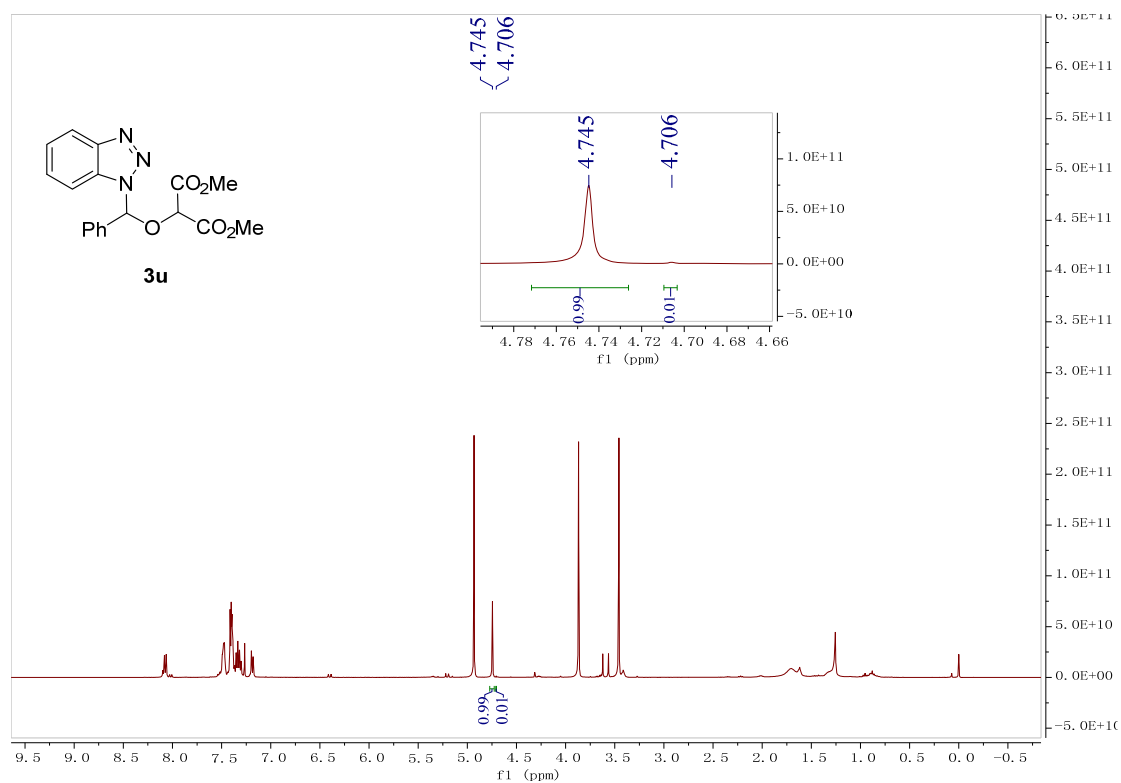

### Crude <sup>1</sup>H NMR of 3v

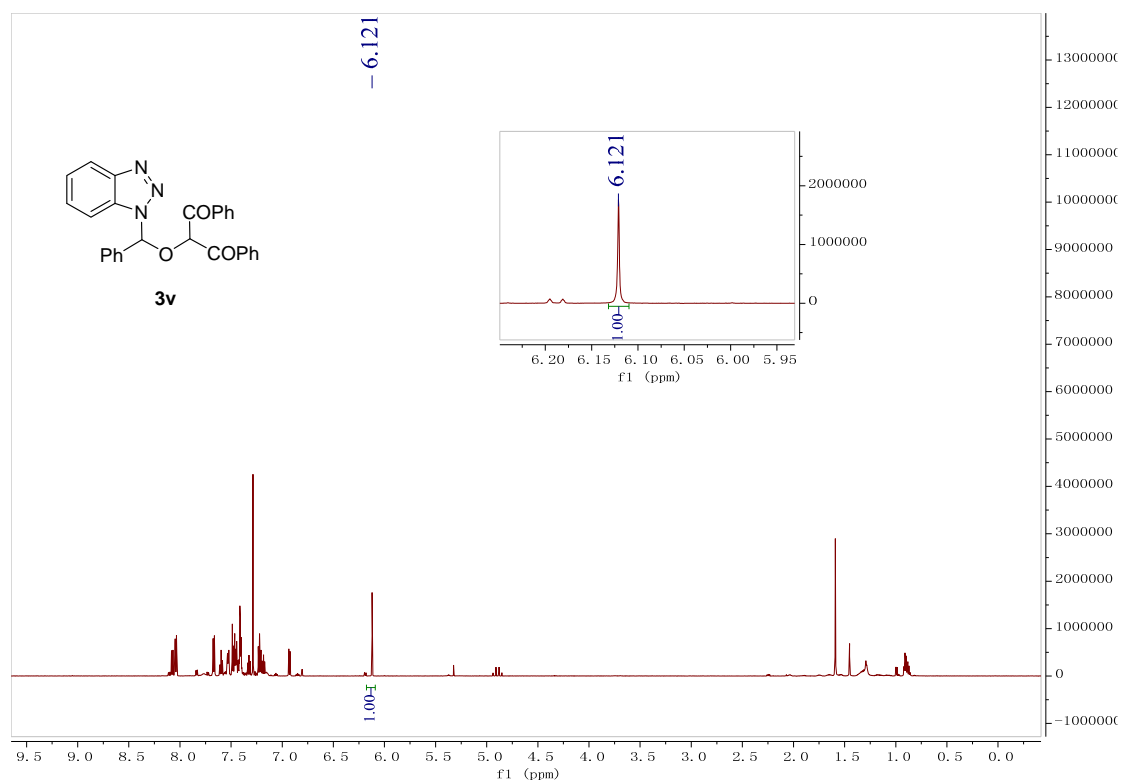

### Crude <sup>1</sup>H NMR of 3w

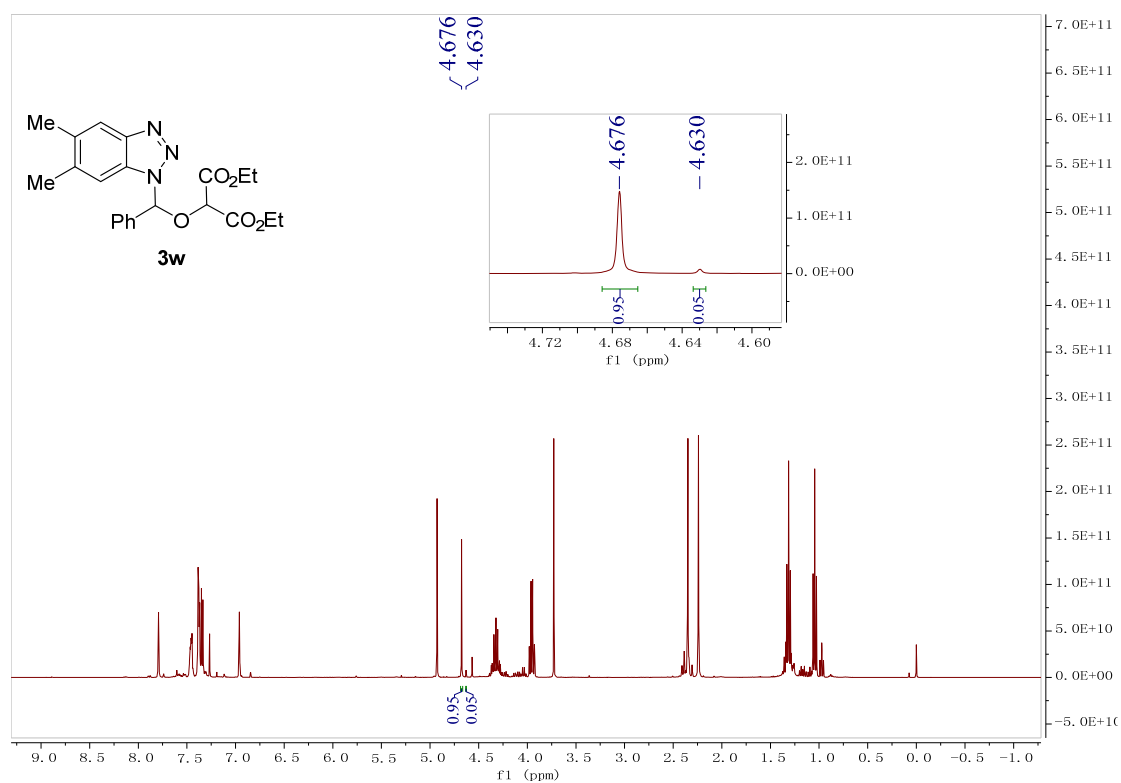

### Crude <sup>1</sup>H NMR of 3x

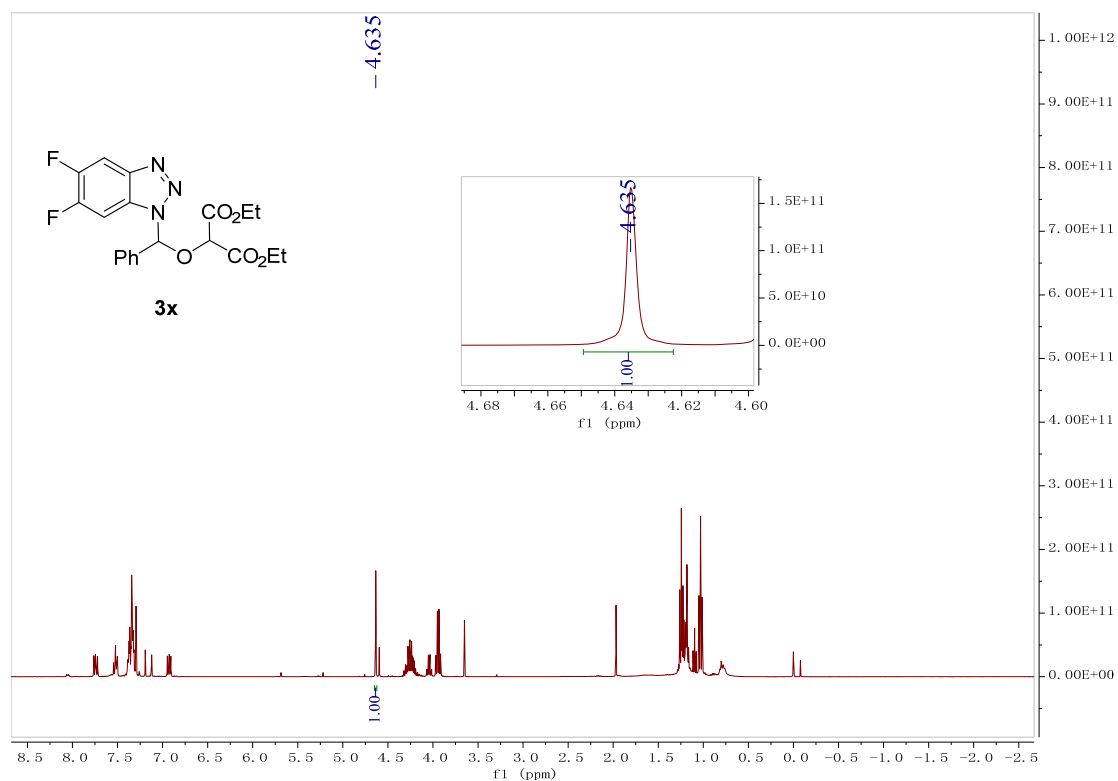

### Crude <sup>1</sup>H NMR of 7i and 7i'

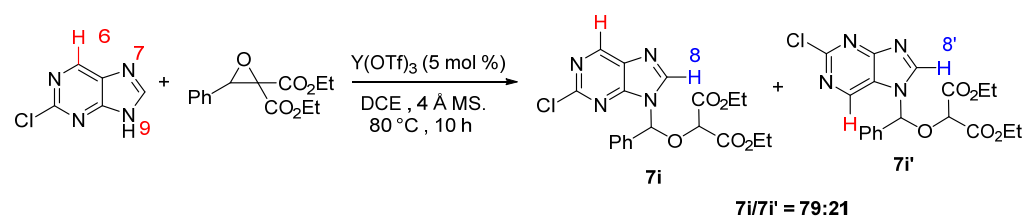

H8 (s, 0.79H), H8'(s, 0.21H)

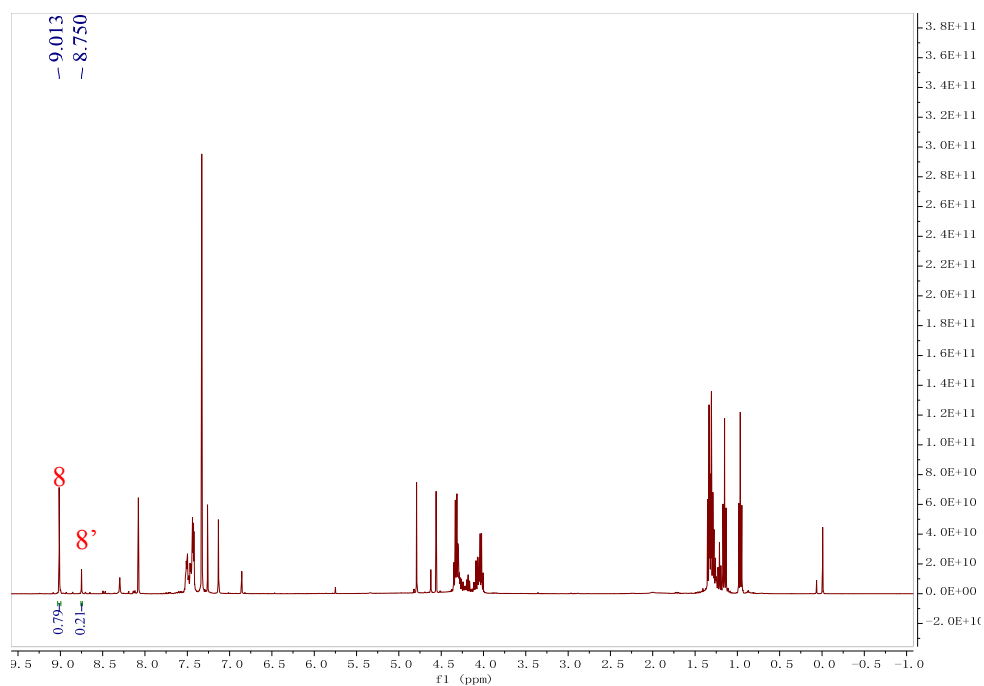

Crude  $^1\text{H}$  NMR of **7a**,  $N^9/N^7 > 95:5$

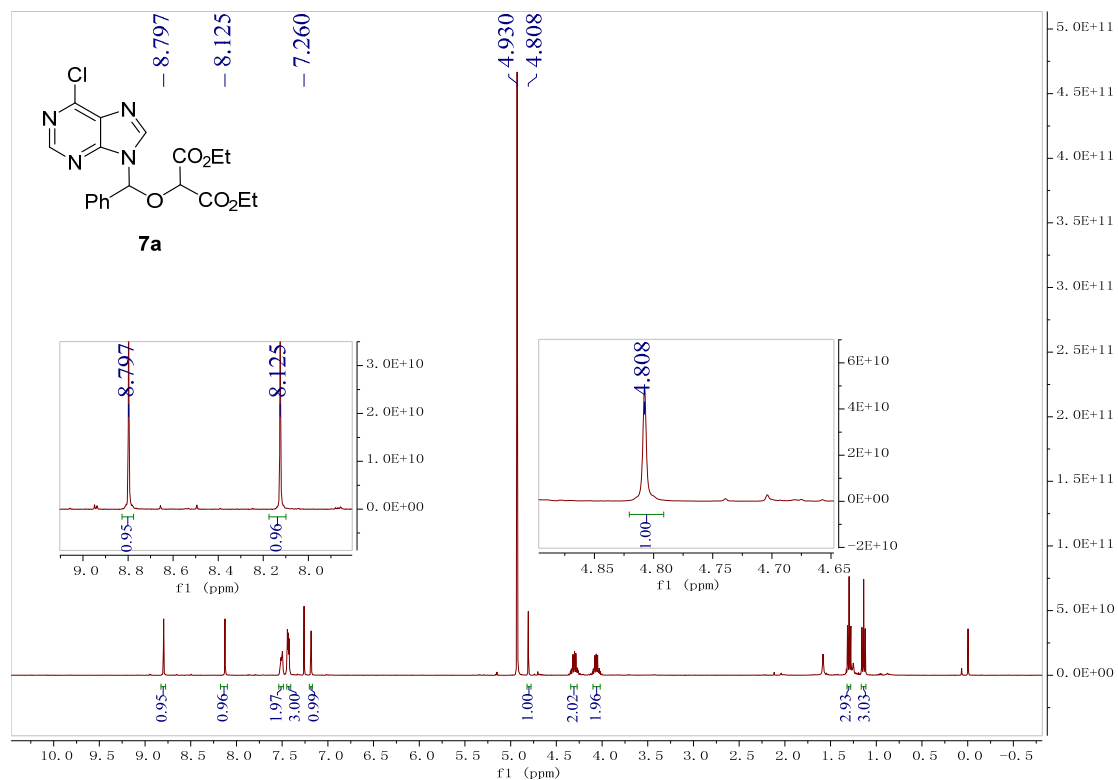

Crude  $^1\text{H}$  NMR of **7b**,  $N^9/N^7 > 95:5$

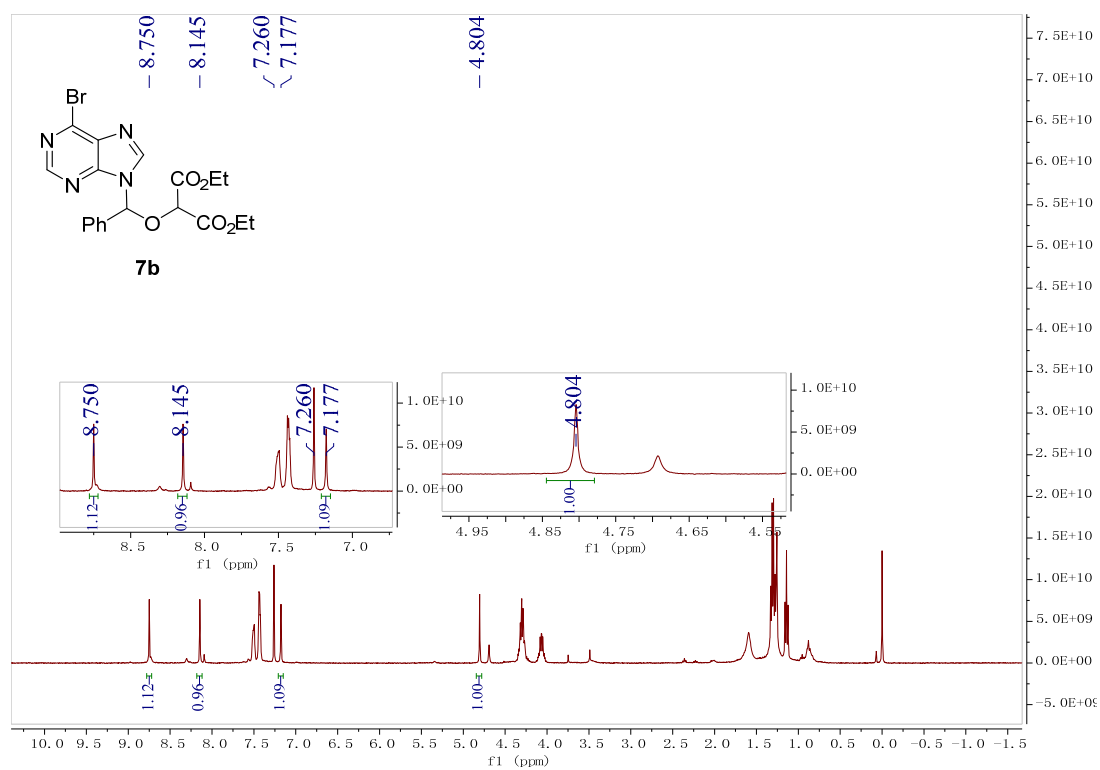

Crude  $^1\text{H}$  NMR of **7c**,  $N^9/N^7 > 95:5$

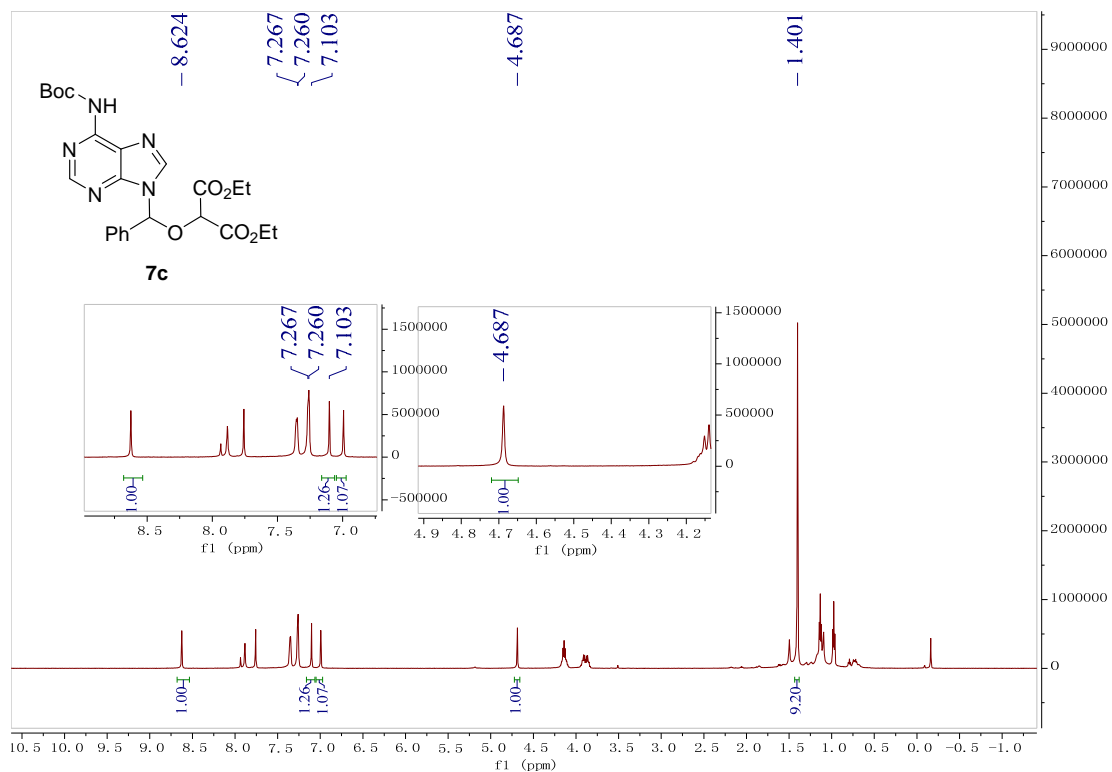

Crude  $^1\text{H}$  NMR of **7d**,  $N^9/N^7 > 95:5$

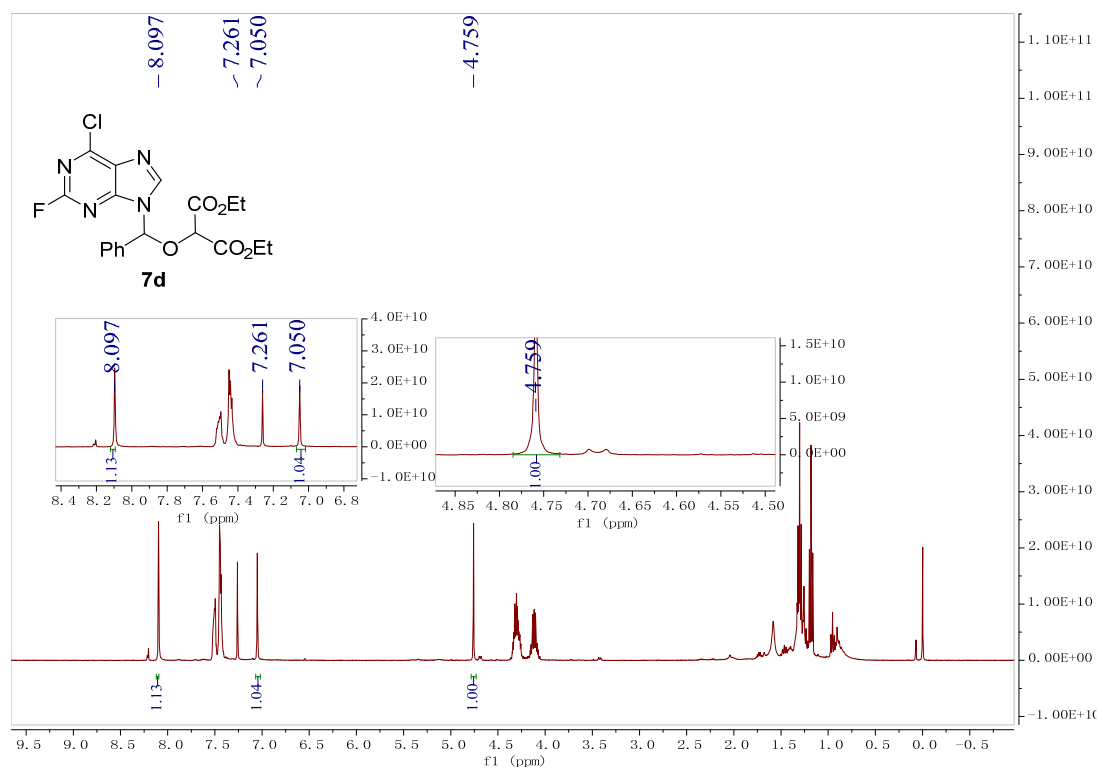

Crude  $^1\text{H}$  NMR of **7e**,  $N^9/N^7 > 95:5$

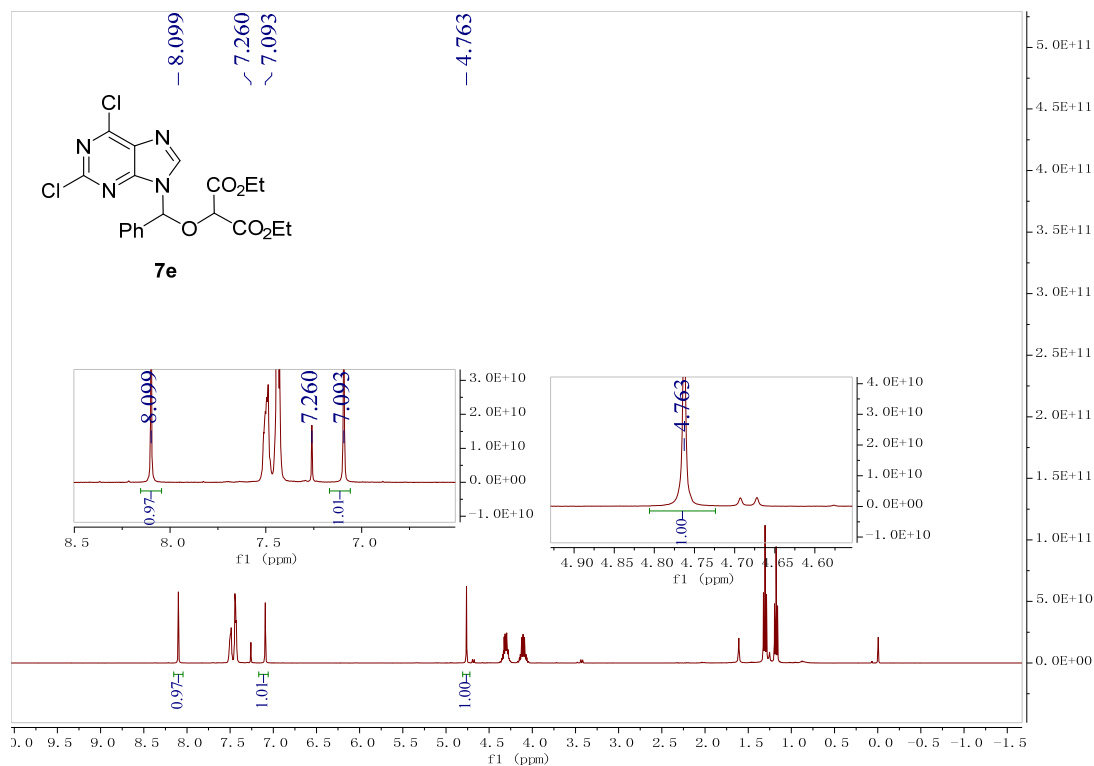

Crude  $^1\text{H}$  NMR of **7f**,  $N^9/N^7 > 95:5$

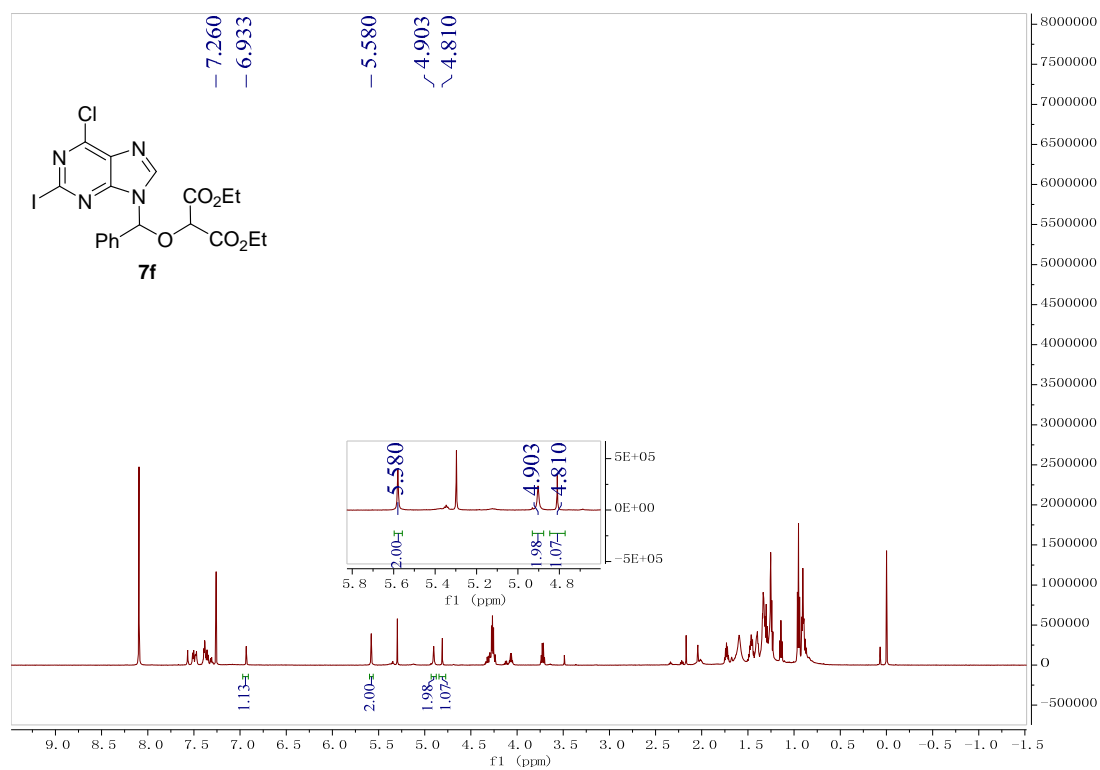



Crude  $^1\text{H}$  NMR of **7g**,  $N^9/N^7 > 95:5$

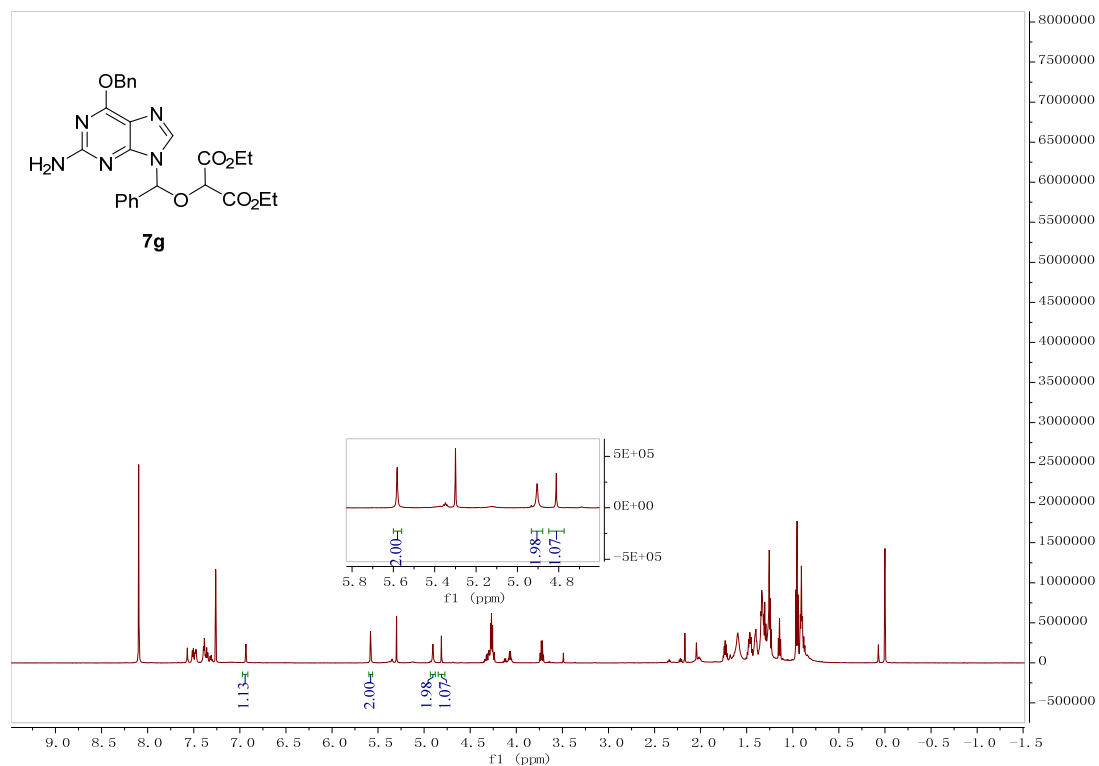

Crude  $^1\text{H}$  NMR of **7h**,  $N^9/N^7 > 95:5$

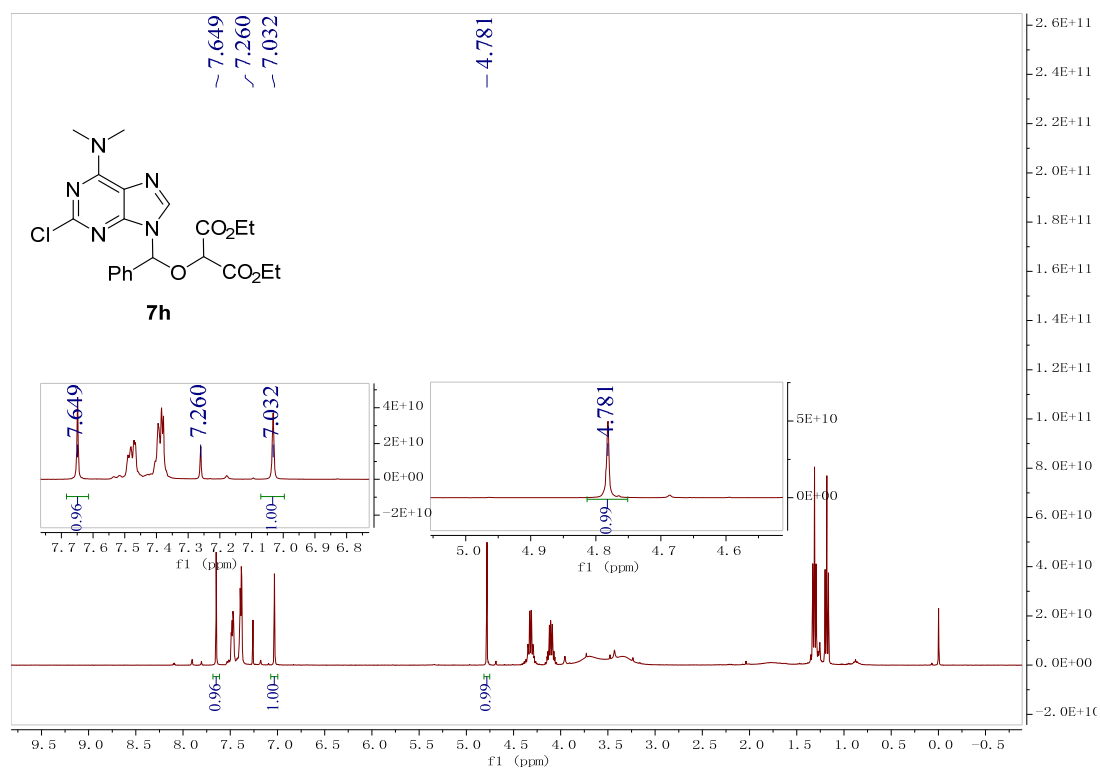

## 17. Reference

- (1) H. Zhou, X. F. Zeng, Y. Xie and G. F. Zhong, *Synlett*, 2015, **26**, 1693.
- (2) G. V. Kryshtal, G. M. Zhdankina and S. G. Zlotin, *Mendeleev Commun.*, 2013, **23**, 24.
- (3) X. Yuan, L. L. Lin, W. L. Chen, W. B. Wu, X. H. Liu and X. M. Feng, *J. Org. Chem.* **2016**, **81**, 1237.
- (4) A. Russo and A. Lattanzi, *Org. Biomol. Chem.*, 2010, **8**, 2633.
- (5) K. Xu, N. Thieme and B. Breit, *Angew. Chem., Int. Ed.*, 2014, **126**, 7896.
